# Supplementary material for: Photo-induced intramolecular dearomative [5 + 4] cycloaddition of arenes for the construction of highly strained medium-sized-rings
Source: PubMed Central journal article supplement (PMC10951311; doi:10.1038/s41467-024-46647-4), 2024-03-19
Supplement: 41467_2024_46647_MOESM1_ESM.pdf [file 41467_2024_46647_MOESM1_ESM.pdf]

# Photo-Induced Intramolecular Dearomative [5 + 4] Cycloaddition of Arenes for the Construction of Highly Strained Medium-Sized-Rings

Min Zhu,<sup>[a,b],†</sup> Yuan-Jun Gao,<sup>[a],†</sup> Xu-Lun Huang,<sup>[a,b],†</sup> Muzi Li<sup>[a]</sup>, Chao Zheng,<sup>[a],\*</sup> and Shu-Li You<sup>[a,b],\*</sup>

<sup>[a]</sup> New Cornerstone Science Laboratory, State Key Laboratory of Organometallic Chemistry, Shanghai Institute of Organic Chemistry, Chinese Academy of Sciences, 345 Lingling Lu, Shanghai 200032, China

<sup>[b]</sup> School of Physical Science and Technology, ShanghaiTech University, 100 Haik Road, Shanghai 201210, China

† These authors contributed equally.

Email: [zhengchao@sioc.ac.cn](mailto:zhengchao@sioc.ac.cn) or [slyou@sioc.ac.cn](mailto:slyou@sioc.ac.cn)

## Table of Contents

|                                                              |            |
|--------------------------------------------------------------|------------|
| <b>1. General Methods</b> .....                              | <b>2</b>   |
| <b>2. General Procedures and Characterization Data</b> ..... | <b>3</b>   |
| <b>3. Transformations of Products</b> .....                  | <b>32</b>  |
| <b>4. Mechanistic Studies</b> .....                          | <b>37</b>  |
| <b>5. Data of X-Ray Crystallographic Analyses</b> .....      | <b>43</b>  |
| <b>6. Copies of NMR Spectra</b> .....                        | <b>57</b>  |
| <b>7. Unsuccessful Substrates</b> .....                      | <b>163</b> |
| <b>8. References</b> .....                                   | <b>164</b> |

## 1. General Methods

Unless stated otherwise, all reactions were carried out in flame-dried glasswares under a dry argon atmosphere. All solvents were purified and dried according to standard methods prior to use.

$^1\text{H}$  and  $^{13}\text{C}$  NMR spectra were recorded on an Agilent instrument (400 MHz and 100 MHz, respectively) or an Agilent instrument (600 MHz and 150 MHz, respectively), and internally referenced to tetramethylsilane signal or residual protio solvent signals.  $^{19}\text{F}$  NMR spectra were recorded on an Agilent instrument (376 MHz) and referenced relative to  $\text{CFCl}_3$ . Data for  $^1\text{H}$  NMR are recorded as follows: chemical shift ( $\delta$ , ppm), multiplicity (s = singlet, d = doublet, t = triplet, m = multiplet or unresolved, br = broad singlet, coupling constant(s) in Hz, integration). Data for  $^{13}\text{C}$  NMR are reported in terms of chemical shift ( $\delta$ , ppm).

Substrates **1** and **9** were synthesized according to the literature procedures.<sup>[1]</sup> Reagents were purchased from Alfa Aesar, and used without further purification.

## 2. General Procedures and Characterization Data

### 2.1 General procedure for the synthesis of the alkyl bromide

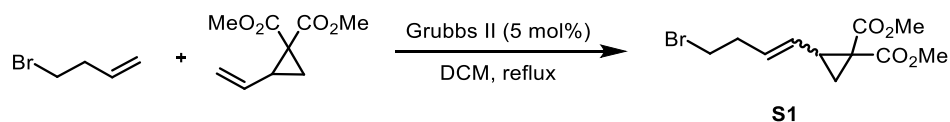

To a solution of 4-bromo-1-butene (1.3 mL, 13 mmol) in anhydrous DCM (30 mL) were added substituted vinylcyclopropanes (1.6 mL, 10 mmol) and Grubbs II catalyst (300 mg, 0.5 mmol) under argon. Then, the mixture was refluxed for 6 h at 60 °C. After completion (monitored by TLC), the reaction was quenched with water. The aqueous layer was extracted with EtOAc (30 mL  $\times$  3). The combined organic layers were washed with brine, dried over Na<sub>2</sub>SO<sub>4</sub>, filtered and concentrated by rotary evaporation. Then, the residue was purified by silica gel column chromatography (petroleum ether/EtOAc = 9/1) to afford the desired product **S1** (1.5 g, 51% yield).

### 2.2 General procedure for the synthesis of substrates **1a-1j**, **1l**, **1s**, **9a** and **9b**<sup>[2]</sup>

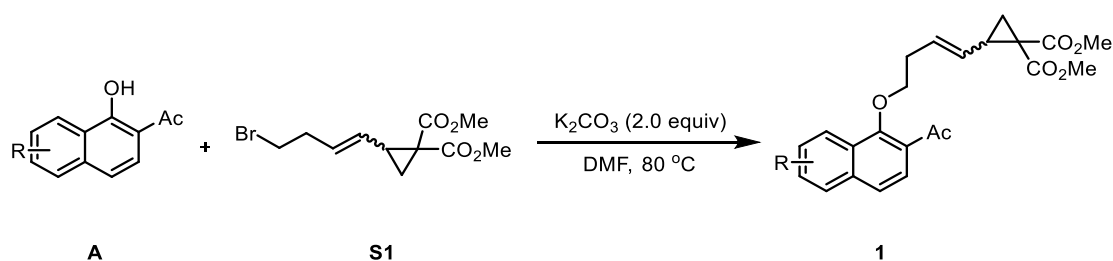

In a round bottom flask, naphthol derivative **A** (4.7 mmol) was dissolved in DMF (reagent grade, 30.0 mL). After the addition of **S1** (1.5 g, 5.2 mmol), K<sub>2</sub>CO<sub>3</sub> (1.3 g, 9.4 mmol) was added in sequence under argon. Then, the mixture was stirred for 24 h at 80 °C. After completion (monitored by TLC), the reaction was quenched with water. The aqueous layer was extracted with EtOAc (30 mL  $\times$  3). The combined organic layers were washed with brine, dried over Na<sub>2</sub>SO<sub>4</sub>, filtered and concentrated by rotary evaporation. Then the residue was purified by silica gel column chromatography (petroleum ether/EtOAc = 6/1) to afford the desired substrates **1a-1j**, **1l**, **1s**, **9a** and **9b** as mixtures

of *E/Z* isomers. The analytical data of the products are summarized below, and the peaks of minor isomers are indicated by an asterisk (\*).

### 2.3 General procedure for the synthesis of substrate **1k**

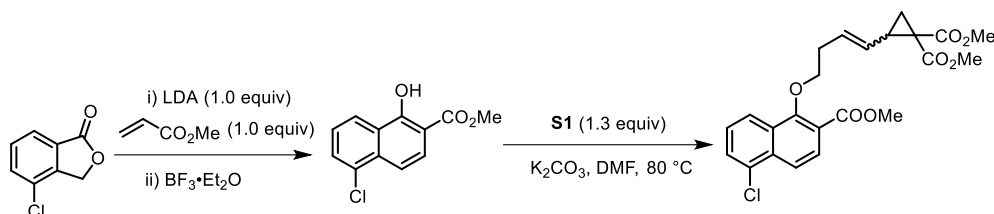

To a stirred solution of DIPEA (1.58 mL, 11.3 mmol) in THF (60 mL) was added *n*-BuLi (4.5 mL, 11.3 mmol, 2.5 M in hexanes) dropwise at  $-40$  °C. The solution was stirred for 15 min at  $-40$  °C, before a solution of 4-chloroisobenzofuran-1(3*H*)-one (1.82 g, 10.8 mmol) in THF (30 mL) was added dropwise at  $-40$  °C. The reaction mixture was stirred for another 15 min, before the addition of a solution of methyl acrylate (974  $\mu$ L, 10.8 mmol) in THF (5 mL) at  $-40$  °C. The resulting reaction mixture was stirred for 30 min at  $-40$  °C and allowed to warm to room temperature. The reaction was quenched with HCl (aq, 2 M, 100 mL) and extracted with Et<sub>2</sub>O ( $3 \times 100$  mL). The combined organics were dried by Na<sub>2</sub>SO<sub>4</sub>, concentrated under reduced pressure and used in the next step without further purification. The crude mixture was then dissolved in CH<sub>2</sub>Cl<sub>2</sub> (80 mL) and BF<sub>3</sub>·OEt<sub>2</sub> (3 mL) was added dropwise. The mixture was stirred at room temperature for 15 min. The reaction was then quenched with H<sub>2</sub>O (50 mL), extracted with CH<sub>2</sub>Cl<sub>2</sub> ( $3 \times 50$  mL), dried (Na<sub>2</sub>SO<sub>4</sub>) and concentrated under reduced pressure to afford a crude naphthol product without further purification.

The naphthol derivative obtained above (389 mg, 1.9 mmol) was dissolved in DMF (reagent grade, 30.0 mL). After the addition of **S1** (609 mg, 2.1 mmol), K<sub>2</sub>CO<sub>3</sub> (524 mg, 3.8 mmol) was added in sequence under argon. Then, the mixture was stirred for 24 h at 80 °C. After completion (monitored by TLC), the reaction was quenched with water. The aqueous layer was extracted with EtOAc (30 mL  $\times$  3). The combined organic layers were washed with brine, dried over Na<sub>2</sub>SO<sub>4</sub>, filtered and concentrated by rotary evaporation. Then the residue was purified by silica gel column chromatography (petroleum ether/EtOAc = 5/1) to afford the desired substrates **1k** as mixtures of *E/Z* isomers. The analytical data of the products are summarized below, and the peaks of minor

isomers are indicated by an asterisk (\*).

## 2.4 General procedure for the synthesis of substrates **1m-1p**

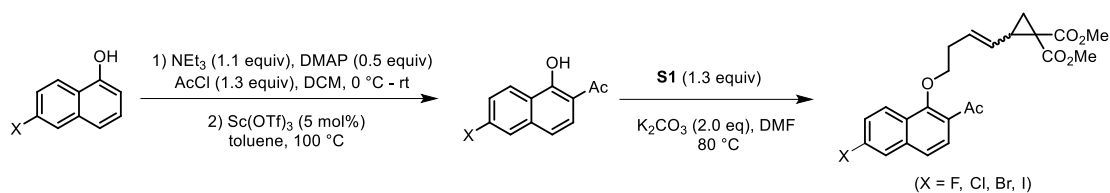

To a stirred solution of the respective naphthol (1 equiv), DMAP (0.5 equiv), Et<sub>3</sub>N (1.1 equiv) and CH<sub>2</sub>Cl<sub>2</sub> (0.3 M) at 0 °C was added the respective acid chloride (6.5 mmol, 1.3 equiv) dropwise. The reaction mixture was warmed to room temperature and stirred for 1–2 h. The reaction was then quenched with HCl (aq, 1 M, 10 mL) and extracted with CH<sub>2</sub>Cl<sub>2</sub> (3 × 10 mL). The combined organics were washed with NaHCO<sub>3</sub> (20 mL), dried over MgSO<sub>4</sub>, concentrated under reduced pressure to afford the acylated naphthol product. To an oven-dried 100 mL round bottom flask was charged Sc(OTf)<sub>3</sub> (5 mol%), the respective acylated naphthol (4.0 mmol, 1 equiv) and toluene (8 mL, anhydrous). The reaction mixture was stirred at 100 °C for 16 h. The reaction was then quenched with water (10 mL) and extracted with CH<sub>2</sub>Cl<sub>2</sub> (3 × 10 mL). The combined organics were dried over Na<sub>2</sub>SO<sub>4</sub>, concentrated under reduced pressure to afford the crude naphthol without further purification.

The naphthol derivatives obtained above were dissolved in DMF (reagent grade, 30.0 mL). After the addition of **S1** (1.3 equiv), K<sub>2</sub>CO<sub>3</sub> (2.0 equiv) was added in sequence under argon. Then, the mixture was stirred for 24 h at 80 °C. After completion (monitored by TLC), the reaction was quenched with water. The aqueous layer was extracted with EtOAc (30 mL × 3). The combined organic layers were washed with brine, dried over Na<sub>2</sub>SO<sub>4</sub>, filtered and concentrated by rotary evaporation. Then the residue was purified by silica gel column chromatography (petroleum ether/EtOAc = 3/1) to afford the desired substrates **1m-1p** as mixtures of *E/Z* isomers. The analytical data of the products are summarized below, and the peaks of minor isomers are indicated by an asterisk (\*).

## 2.5 General procedure for the synthesis of substrate **1q**

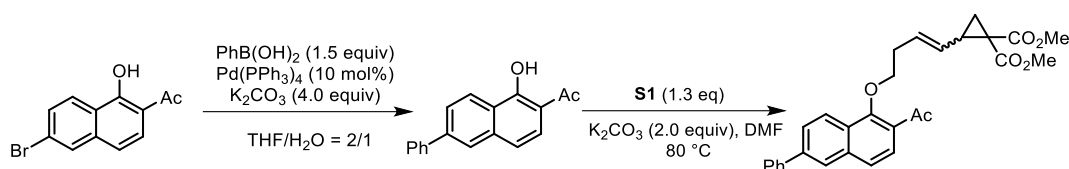

In a round bottom flask, 6-Br naphthol derivative (396 mg, 1.5 mmol) was dissolved in THF/H<sub>2</sub>O = 2/1 (4.8 mL). After the addition of PhB(OH)<sub>2</sub> (274 mg, 2.25 mmol), Pd(PPh<sub>3</sub>)<sub>4</sub> (173 mg, 0.15 mmol), K<sub>2</sub>CO<sub>3</sub> (828 g, 6 mmol) was added in sequence under argon. Then, the mixture was stirred for 24 h at 80 °C. After completion (monitored by TLC), the reaction was quenched with water. The aqueous layer was extracted with EtOAc (30 mL × 3). The combined organic layers were washed with brine, dried over Na<sub>2</sub>SO<sub>4</sub>, filtered and concentrated by rotary evaporation to afford the naphthol product without further purification.

The naphthol derivative obtained above (299 mg, 1.1 mmol) was dissolved in DMF (reagent grade, 10.0 mL). After the addition of **S1** (0.63 g, 6.1 mmol), K<sub>2</sub>CO<sub>3</sub> (320 mg, 2.3 mmol) was added in sequence under argon. Then, the mixture was stirred for 24 h at 80 °C. After completion (monitored by TLC), the reaction was quenched with water. The aqueous layer was extracted with EtOAc (30 mL × 3). The combined organic layers were washed with brine, dried over Na<sub>2</sub>SO<sub>4</sub>, filtered and concentrated by rotary evaporation. Then the residue was purified by silica gel column chromatography (petroleum ether/EtOAc = 3/1) to afford the desired substrates **1q** as mixtures of *E/Z* isomers. The analytical data of the products are summarized below, and the peaks of minor isomers are indicated by an asterisk (\*).

## 2.6 General procedure for the synthesis of substrate **1r**

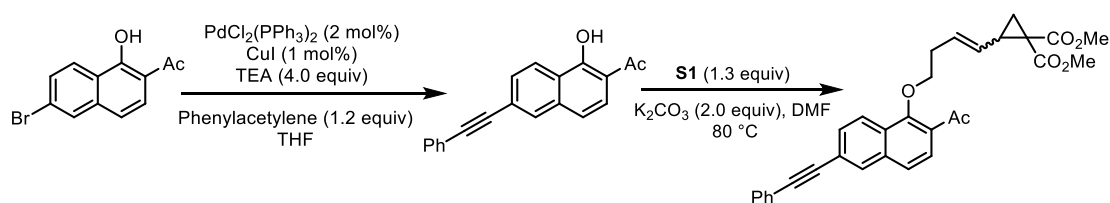

In a round bottom flask, 6-Br naphthol derivative (1.06 g, 4 mmol) was dissolved in THF (20 mL). After the addition of PdCl<sub>2</sub>(PPh<sub>3</sub>)<sub>2</sub> (56.2 mg, 0.08 mmol), CuI (7.6 mg, 0.04 mmol), TEA (2.2 mL, 16.0 mmol) was added in sequence under argon. Then, the

mixture was stirred for 18 h at 60 °C. After completion (monitored by TLC), the reaction was quenched with water. The aqueous layer was extracted with EtOAc (30 mL × 3). The combined organic layers were washed with brine, dried over Na<sub>2</sub>SO<sub>4</sub>, filtered and concentrated by rotary evaporation to afford the crude naphthol without further purification.

The naphthol derivative obtained above (330 mg, 1.2 mmol) was dissolved in DMF (reagent grade, 10.0 mL). After the addition of **S1** (368 mg, 1.3 mmol), K<sub>2</sub>CO<sub>3</sub> (317 mg, 2.3 mmol) was added in sequence under argon. Then, the mixture was stirred for 24 h at 80 °C. After completion (monitored by TLC), the reaction was quenched with water. The aqueous layer was extracted with EtOAc (30 mL × 3). The combined organic layers were washed with brine, dried over Na<sub>2</sub>SO<sub>4</sub>, filtered and concentrated by rotary evaporation. Then the residue was purified by silica gel column chromatography (petroleum ether/EtOAc = 3/1) to afford the desired substrates **1r** as mixtures of *E/Z* isomers. The analytical data of the products are summarized below, and the peaks of minor isomers are indicated by an asterisk (\*).

## 2.7 General procedure for the synthesis of substrate **1t**

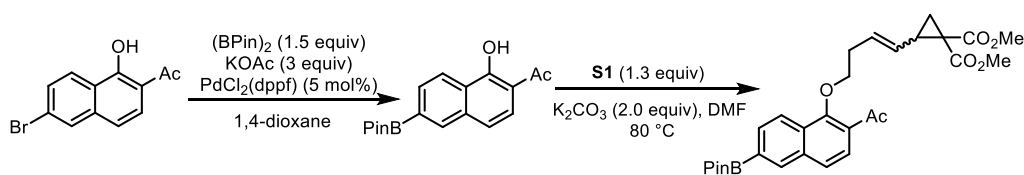

In a round bottom flask, 6-Br naphthol derivative (1.06 g, 4 mmol) was dissolved in dioxane (30 mL). After the addition of (Bpin)<sub>2</sub> (1.5 equiv), KOAc (3 equiv), PdCl<sub>2</sub>(dppf) (5 mol%) was added in sequence under argon. Then, the mixture was stirred for 18 h at 80 °C. After completion (monitored by TLC), the reaction was quenched with water. The aqueous layer was extracted with EtOAc (30 mL × 3). The combined organic layers were washed with brine, dried over Na<sub>2</sub>SO<sub>4</sub>, filtered and concentrated by rotary evaporation to afford the crude naphthol without further purification.

The naphthol derivative obtained above (204 mg, 0.7 mmol) was dissolved in DMF (reagent grade, 10.0 mL). After the addition of **S1** (210 mg, 0.7 mmol), K<sub>2</sub>CO<sub>3</sub> (180 mg, 1.3 mmol) was added in sequence under argon. Then, the mixture was stirred for

24 h at 80 °C. After completion (monitored by TLC), the reaction was quenched with water. The aqueous layer was extracted with EtOAc (30 mL × 3). The combined organic layers were washed with brine, dried over Na<sub>2</sub>SO<sub>4</sub>, filtered and concentrated by rotary evaporation. Then the residue was purified by silica gel column chromatography (petroleum ether/EtOAc = 4/1) to afford the desired substrates **1t** as mixtures of *E/Z* isomers. The analytical data of the products are summarized below, and the peaks of minor isomers are indicated by an asterisk (\*).

## 2.8 Characterization data of substrates

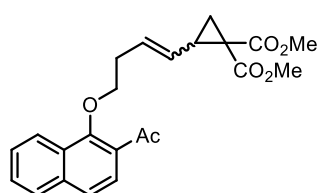

**1a**, brown oil, 0.34 g, 43% yield (2.0 mmol scale), *E/Z* = 4/1. <sup>1</sup>H NMR (400 MHz, CDCl<sub>3</sub>) δ 8.22-8.17 (m, 1H), 7.84-7.82 (m, 1H), 7.70-7.66 (m, 1H), 7.61-7.55 (m, 3H), 5.92-5.72 (m, 1H), 5.29 (dd, *J* = 15.2, 8.4 Hz, 1H), 5.20-5.14 (m, 1H\*), 4.13-3.99 (m, 2H), 3.74 (s, 3H), 3.67 (s, 3H), 2.89-2.28 (m, 3H), 2.75 (s, 3H\*), 2.73 (s, 3H), 1.74-1.55 (m, 2H). <sup>13</sup>C NMR (100 MHz, CDCl<sub>3</sub>) δ 200.4, 200.3, 169.8, 167.73, 167.68, 155.8, 155.7, 136.53, 136.49, 130.2, 129.9, 128.18, 128.15, 128.04, 128.01, 127.82, 127.75, 127.4, 126.4, 125.21, 125.18, 123.9, 123.1, 75.9, 75.7, 52.6, 52.5, 52.42, 52.40, 35.5, 35.4, 33.3, 30.64, 30.61, 28.8, 26.4, 21.7, 20.8, 20.6. IR (thin film)  $\nu_{\max}$  (cm<sup>-1</sup>) = 3000, 2951, 1723, 1673, 1622, 1595, 1566, 1502, 1434, 1398, 1358, 1207, 1126, 1072, 964, 899, 874, 817, 751, 730, 688. HRMS (ESI) calcd for C<sub>23</sub>H<sub>24</sub>NaO<sub>6</sub> [M+Na]<sup>+</sup>: 419.1465. Found: 419.1471.

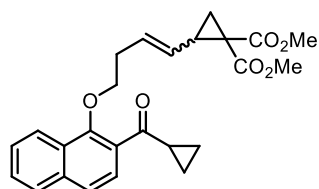

**1b**, yellow oil, 1.10 g, 56% yield (4.6 mmol scale), *E/Z* = 4.6/1. <sup>1</sup>H NMR (400 MHz, CDCl<sub>3</sub>) δ 8.27-8.22 (m, 1H), 7.84-7.81 (m, 1H), 7.64-7.53 (m, 4H), 5.90-5.74 (m, 1H), 5.26 (dd, *J* = 15.2, 8.4 Hz, 1H), 5.18-5.10 (m, 1H\*), 4.12-4.01 (m, 2H), 3.74 (s, 3H), 3.69 (s, 3H), 3.02-2.95 (m, 1H), 2.85-2.53 (m, 3H), 1.73-1.55 (m, 2H), 1.33-1.30 (m,



2H), 1.09-1.04 (m, 2H).  $^{13}\text{C}$  NMR (100 MHz,  $\text{CDCl}_3$ )  $\delta$  203.6, 169.8, 167.7, 155.6, 136.3, 130.3, 130.0, 128.6, 128.2, 127.9, 127.7, 127.5, 127.1, 126.4, 125.3, 123.7, 123.0, 76.0, 75.8, 52.5, 52.4, 35.4, 33.4, 30.7, 28.9, 26.4, 21.7, 21.1, 20.6, 12.6, 12.5. IR (thin film)  $\nu_{\text{max}}$  ( $\text{cm}^{-1}$ ) = 3005, 2951, 1723, 1660, 1622, 1594, 1502, 1433, 1383, 1359, 1264, 1206, 1126, 1089, 1001, 964, 820, 758, 728, 704, 675. HRMS (ESI) calcd for  $\text{C}_{25}\text{H}_{26}\text{NaO}_6$   $[\text{M}+\text{Na}]^+$ : 445.1622. Found: 445.1625.

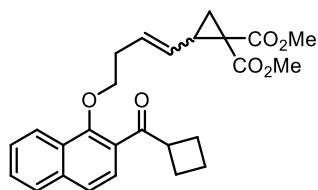

**1c**, yellow oil, 0.63 g, 30% yield (4.9 mmol scale),  $E/Z = 5.4/1$ .  $^1\text{H}$  NMR (400 MHz,  $\text{CDCl}_3$ )  $\delta$  8.23-8.16 (m, 1H), 7.84-7.81 (m, 1H), 7.63-7.53 (m, 4H), 5.92-5.76 (m, 1H), 5.28 (dd,  $J = 15.6, 8.4$  Hz, 1H), 5.19-5.12 (m, 1H\*), 4.21-4.11 (m, 1H), 4.07-3.89 (m, 2H), 3.76-3.68 (m, 6H), 2.88-2.57 (m, 3H), 2.41-2.20 (m, 4H), 2.09-1.82 (m, 2H), 1.75-1.57 (m, 2H).  $^{13}\text{C}$  NMR (100 MHz,  $\text{CDCl}_3$ )  $\delta$  204.9, 169.8, 167.6, 154.8, 136.1, 130.3, 130.0, 128.0, 127.72, 127.70, 127.5, 127.2, 127.1, 126.3, 125.2, 123.8, 123.6, 123.0, 75.9, 75.7, 52.52, 52.46, 52.4, 52.3, 45.02, 44.98, 35.4, 33.3, 30.7, 28.8, 26.4, 25.1, 21.6, 20.5, 17.6. IR (thin film)  $\nu_{\text{max}}$  ( $\text{cm}^{-1}$ ) = 2949, 2868, 1723, 1669, 1621, 1594, 1565, 1397, 1330, 1265, 1207, 1125, 1068, 965, 900, 873, 822, 780, 755, 703, 572. HRMS (ESI) calcd for  $\text{C}_{26}\text{H}_{28}\text{NaO}_6$   $[\text{M}+\text{Na}]^+$ : 459.1778. Found: 459.1774.

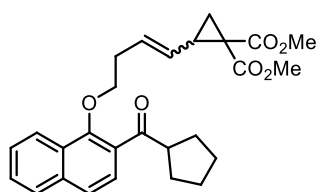

**1d**, yellow oil, 1.00 g, 47% yield (4.7 mmol scale),  $E/Z = 4.6/1$ .  $^1\text{H}$  NMR (400 MHz,  $\text{CDCl}_3$ )  $\delta$  8.19-8.17 (m, 1H), 7.85-7.82 (m, 1H), 7.63-7.48 (m, 4H), 5.89-5.68 (m, 1H), 5.25 (dd,  $J = 15.6, 8.4$  Hz, 1H), 5.18-5.09 (m, 1H\*), 4.07-3.97 (m, 2H), 3.89-3.82 (m, 1H), 3.74 (s, 3H), 3.70 (s, 3H), 2.83-2.54 (m, 3H), 1.90-1.85 (m, 4H), 1.75-1.57 (m, 6H).  $^{13}\text{C}$  NMR (100 MHz,  $\text{CDCl}_3$ )  $\delta$  207.7, 170.0, 167.9, 154.1, 136.0, 130.5, 129.3, 128.2, 127.9, 127.7, 126.5, 125.3, 124.0, 123.1, 76.1, 52.7, 52.6, 50.8, 35.6, 33.5, 30.9, 29.7, 26.1, 21.8, 20.8. IR (thin film)  $\nu_{\text{max}}$  ( $\text{cm}^{-1}$ ) = 2951, 2868, 1723, 1679, 1565, 1435,

1396, 1356, 1330, 1265, 1207, 1126, 1092, 1004, 964, 900, 873, 820, 759, 705, 571.  
HRMS (ESI) calcd for  $C_{27}H_{30}NaO_6$   $[M+Na]^+$ : 473.1935. Found: 473.1937.

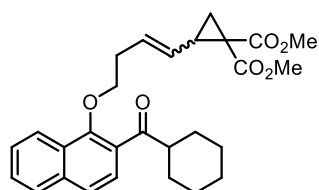

**1e**, yellow oil, 0.57 g, 31% yield (4.1 mmol scale),  $E/Z = 4.4/1$ .  $^1H$  NMR (400 MHz,  $CDCl_3$ )  $\delta$  8.21-8.16 (m, 1H), 7.84-7.82 (m, 1H), 7.61 (d,  $J = 8.4$  Hz, 1H), 7.57-7.44 (m, 3H), 5.91-5.74 (m, 1H), 5.26 (dd,  $J = 15.6, 8.4$  Hz, 1H), 5.19-5.11 (m, 1H\*), 4.07-3.96 (m, 2H), 3.74 (s, 3H), 3.70 (s, 3H), 3.41-3.31 (m, 1H), 2.85-2.55 (m, 3H), 1.92-1.88 (m, 2H), 1.82-1.64 (m, 4H), 1.61-1.58 (m, 1H), 1.50-1.20 (m, 5H).  $^{13}C$  NMR (100 MHz,  $CDCl_3$ )  $\delta$  208.2, 169.9, 167.7, 153.8, 135.9, 130.4, 130.1, 128.8, 128.0, 127.8, 127.62, 127.55, 127.1, 126.4, 125.2, 123.9, 122.9, 76.0, 75.8, 52.6, 52.4, 49.7, 35.5, 33.4, 30.8, 28.9, 28.9, 26.5, 25.9, 25.69, 25.68, 21.7, 20.7. IR (thin film)  $\nu_{max}$  ( $cm^{-1}$ ) = 2927, 2852, 1724, 1678, 1621, 1594, 1566, 1435, 1358, 1333, 1207, 1126, 1087, 985, 964, 896, 845, 821, 798, 766, 705. HRMS (ESI) calcd for  $C_{28}H_{32}NaO_6$   $[M+Na]^+$ : 487.2091. Found: 487.2101.

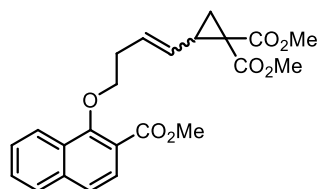

**1f**, yellow oil, 1.11 g, 57% yield (4.7 mmol scale),  $E/Z = 4.7/1$ .  $^1H$  NMR (400 MHz,  $CDCl_3$ )  $\delta$  8.29-8.23 (m, 1H), 7.87-7.83 (m, 2H), 7.61-7.53 (m, 3H), 5.96-5.81 (m, 1H), 5.29 (dd,  $J = 15.2, 8.4$  Hz, 1H), 5.20-5.09 (m, 1H\*), 4.19-4.08 (m, 2H), 3.96 (s, 3H), 3.74 (s, 3H), 3.70 (s, 3H), 2.92-2.57 (m, 3H), 1.75-1.58 (m, 2H).  $^{13}C$  NMR (100 MHz,  $CDCl_3$ )  $\delta$  170.1, 167.9, 166.7, 157.1, 136.6, 130.9, 128.7, 128.3, 127.7, 127.3, 126.6, 126.5, 123.7, 123.5, 119.1, 116.5, 75.3, 52.7, 52.5, 52.2, 35.5, 33.5, 31.0, 28.1, 25.8, 21.5, 20.8. IR (thin film)  $\nu_{max}$  ( $cm^{-1}$ ) = 2998, 2951, 1719, 1624, 1503, 1400, 1360, 1334, 1237, 1207, 1151, 1127, 1081, 965, 899, 873, 826, 800, 767, 724, 431. HRMS (ESI) calcd for  $C_{23}H_{24}NaO_7$   $[M+Na]^+$ : 435.1414. Found: 435.1416.

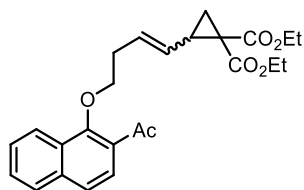

**1g**, brown oil, 0.67 g, 39% yield (4.2 mmol scale),  $E/Z = 2.9/1$ .  $^1\text{H}$  NMR (400 MHz,  $\text{CDCl}_3$ )  $\delta$  8.23-8.17 (m, 1H), 7.85-7.80 (m, 1H), 7.70-7.66 (m, 1H), 7.61-7.51 (m, 3H), 5.91-5.75 (m, 1H), 5.30 (dd,  $J = 15.2, 8.4$  Hz, 1H), 5.21-5.09 (m, 1H\*), 4.28-3.98 (m, 6H), 2.89-2.53 (m, 6H), 1.70-1.51 (m, 2H), 1.29-1.19 (m, 6H).  $^{13}\text{C}$  NMR (100 MHz,  $\text{CDCl}_3$ )  $\delta$  200.3, 169.4, 167.3, 155.7, 136.5, 129.80, 129.77, 128.2, 128.1, 128.04, 128.01, 127.8, 126.4, 125.2, 123.9, 123.2, 76.0, 75.8, 61.4, 61.2, 35.8, 35.7, 35.6, 33.3, 30.62, 30.57, 30.2, 29.7, 28.8, 21.4, 20.3, 14.02, 14.00, 13.90, 13.88. IR (thin film)  $\nu_{\text{max}}$  ( $\text{cm}^{-1}$ ) = 2981, 2936, 1719, 1674, 1595, 1427, 1394, 1316, 1269, 1244, 1127, 1111, 1072, 1019, 965, 912, 868, 817, 751, 728, 688, 664. HRMS (ESI) calcd for  $\text{C}_{25}\text{H}_{28}\text{NaO}_6$   $[\text{M}+\text{Na}]^+$ : 447.1778. Found: 447.1784.

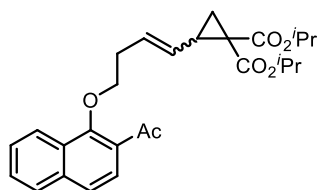

**1h**, yellow oil, 2.20 g, 78% yield (6.2 mmol scale),  $E/Z = 4.3/1$ .  $^1\text{H}$  NMR (400 MHz,  $\text{CDCl}_3$ )  $\delta$  8.16-8.08 (m, 1H), 7.77-7.73 (m, 1H), 7.62-7.58 (m, 1H), 7.53-7.45 (m, 3H), 5.82-5.63 (m, 1H), 5.20 (dd,  $J = 15.2, 8.4$  Hz, 1H), 5.12-5.05 (m, 1H\*), 5.01-4.94 (m, 2H), 4.04-3.91 (m, 2H), 2.83-2.43 (m, 3H), 2.68 (s, 3H\*), 2.65 (s, 3H), 1.60-1.38 (m, 2H), 1.19-1.14 (m, 9H), 1.11-1.07 (m, 3H).  $^{13}\text{C}$  NMR (100 MHz,  $\text{CDCl}_3$ )  $\delta$  200.4, 169.2, 167.0, 155.8, 136.6, 129.5, 129.2, 128.31, 128.27, 128.11, 128.09, 127.9, 126.5, 125.3, 124.0, 123.2, 76.1, 69.0, 68.7, 36.0, 33.4, 30.7, 29.8, 21.8, 21.6, 21.6, 21.4, 20.1. IR (thin film):  $\nu_{\text{max}}$  ( $\text{cm}^{-1}$ ) = 2980, 2936, 1714, 1675, 1596, 1458, 1427, 1358, 1335, 1311, 1270, 1244, 1146, 1097, 1072, 966, 900, 817, 751, 729, 688, 664. HRMS (ESI) calcd for  $\text{C}_{27}\text{H}_{32}\text{NaO}_6$   $[\text{M}+\text{Na}]^+$ : 475.2091. Found: 475.2092.

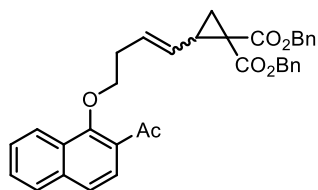

**1i**, yellow oil, 0.90 g, 36% yield (4.5 mmol scale),  $E/Z = 4.6/1$ .  $^1\text{H}$  NMR (400 MHz,  $\text{CDCl}_3$ )  $\delta$  8.18-8.15 (m, 1H), 7.84-7.81 (m, 1H), 7.70-7.66 (m, 1H), 7.60 (d,  $J = 8.4$  Hz, 1H), 7.57-7.51 (m, 2H), 7.34-7.26 (m, 5H), 7.22-7.17 (m, 5H), 5.87-5.69 (m, 1H), 5.23-5.17 (m, 2H), 5.13-5.09 (m, 3H), 3.98-3.90 (m, 2H), 2.89-2.69 (m, 3H), 2.67-2.48 (m, 3H), 1.76-1.58 (m, 2H).  $^{13}\text{C}$  NMR (100 MHz,  $\text{CDCl}_3$ )  $\delta$  200.5, 169.3, 167.2, 155.8, 136.6, 135.39, 135.35, 130.3, 128.4, 128.32, 128.29, 128.23, 128.15, 127.9, 127.7, 126.5, 125.3, 124.0, 123.3, 76.0, 67.3, 67.2, 35.7, 33.3, 31.0, 30.7, 20.9. IR (thin film)  $\nu_{\text{max}}$  ( $\text{cm}^{-1}$ ) = 3032, 2942, 1720, 1672, 1622, 1595, 1566, 1455, 1427, 1314, 1268, 1244, 1190, 1072, 964, 908, 817, 733, 694, 601, 583, 507. HRMS (ESI) calcd for  $\text{C}_{35}\text{H}_{32}\text{NaO}_6$   $[\text{M}+\text{Na}]^+$ : 571.2091. Found: 571.2097.

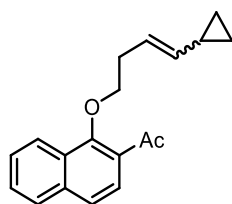

**1j**, colorless oil, 0.51 g, 43% yield (4.2 mmol scale),  $E/Z = 8/1$ .  $^1\text{H}$  NMR (400 MHz,  $\text{CDCl}_3$ )  $\delta$  8.26-8.19 (m, 1H), 7.81-7.78 (m, 1H), 7.70-7.66 (m, 1H), 7.58-7.50 (m, 3H), 5.63-5.55 (m, 1H), 5.48-5.41 (m, 1H\*), 5.15 (dd,  $J = 15.2, 8.4$  Hz, 1H), 4.96-4.91 (m, 1H\*), 4.05 (t,  $J = 6.8$  Hz, 2H\*), 3.99 (t,  $J = 6.8$  Hz, 2H), 2.79-2.72 (m, 3H), 2.57 (q,  $J = 6.8$  Hz, 2H), 1.61-1.56 (m, 1H\*), 1.42-1.34 (m, 1H), 0.78-0.61 (m, 2H), 0.36-0.32 (m, 2H).  $^{13}\text{C}$  NMR (100 MHz,  $\text{CDCl}_3$ )  $\delta$  200.5, 156.0, 137.2, 136.6, 128.3, 128.2, 128.0, 127.8, 126.3, 125.3, 123.8, 123.3, 122.7, 122.4, 76.7, 33.3, 30.7, 30.7, 28.6, 13.5, 9.7, 6.9, 6.3. IR (thin film)  $\nu_{\text{max}}$  ( $\text{cm}^{-1}$ ) = 3002, 2930, 1671, 1622, 1595, 1566, 1458, 1398, 1242, 1191, 1151, 1112, 1046, 961, 870, 814, 749, 727, 687, 663, 616, 565. HRMS (ESI) calcd for  $\text{C}_{19}\text{H}_{20}\text{NaO}_2$   $[\text{M}+\text{Na}]^+$ : 303.1356. Found: 303.1351.

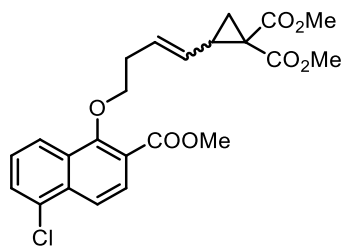

**1k**, yellow oil, 0.31 g, 37% yield (1.9 mmol scale), *E/Z* = 5.9/1. <sup>1</sup>H NMR (400 MHz, CDCl<sub>3</sub>) δ 8.15-8.13 (m, 1H), 7.95-7.93 (m, 1H), 7.88-7.86 (m, 1H), 7.60-7.58 (m, 1H), 7.41-7.37 (m, 1H), 5.86-5.82 (m, 1H), 5.81-5.74 (m, 1H\*), 5.29-5.23 (m, 1H), 5.11-5.06 (m, 1H\*), 4.04 (t, *J* = 6.4 Hz, 2H), 3.93 (s, 3H\*), 3.92 (s, 3H), 3.69 (s, 3H), 3.65 (s, 3H), 2.62-2.54 (m, 3H), 1.69-1.65 (m, 1H), 1.62-1.59 (m, 1H\*), 1.57-1.53 (m, 1H), <sup>13</sup>C NMR (100 MHz, CDCl<sub>3</sub>) δ 170.0, 167.8, 166.2, 156.9, 133.8, 131.9, 130.7, 130.1, 128.5, 127.7, 127.4, 126.3, 122.8, 119.8, 119.8, 75.5, 75.3, 52.7, 52.6, 52.5, 52.5, 52.3, 35.6, 35.6, 33.4, 30.9, 28.9, 26.7, 21.8, 20.7. IR (thin film)  $\nu_{\max}$  (cm<sup>-1</sup>) = 2953, 1726, 1592, 1495, 1437, 1401, 1359, 1328, 1262, 1204, 1132, 1103, 1062, 1002, 970, 882, 824, 779. HRMS (ESI) calcd for C<sub>23</sub>H<sub>23</sub>O<sub>7</sub>NaCl [M+Na]<sup>+</sup>: 469.1025. Found: 469.1026.

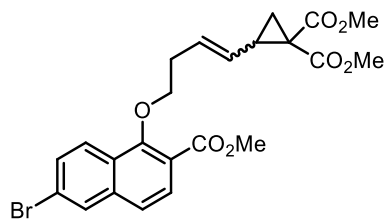

**1l**, yellow oil, 0.42 g, 39% yield (2.2 mmol scale), *E/Z* = 5.3/1. <sup>1</sup>H NMR (400 MHz, CDCl<sub>3</sub>) δ 8.10-8.08 (m, 1H), 7.951-7.946 (m, 1H), 7.84-7.81 (m, 1H), 7.59-7.57 (m, 1H), 7.46-7.44 (m, 1H), 5.91-5.83 (m, 1H), 5.81-5.75 (m, 1H\*), 5.30-5.24 (m, 1H), 5.12-5.06 (m, 1H\*), 4.34 (t, *J* = 5.2 Hz, 2H), 3.72 (s, 3H), 3.70 (s, 3H\*), 3.67 (s, 3H), 2.86-2.73 (m, 3H), 2.63-2.55 (m, 3H), 1.71-1.68 (m, 1H), 1.64-1.60 (m, 1H\*), 1.59-1.55 (m, 1H). <sup>13</sup>C NMR (100 MHz, CDCl<sub>3</sub>) δ 170.1, 167.9, 166.4, 157.2, 137.6, 130.8, 130.4\*, 123.0, 129.8, 128.1, 127.5, 127.3, 127.2\*, 125.7, 123.0, 122.5, 119.4, 75.5, 75.3\*, 53.5\*, 52.7, 52.6, 52.3, 35.7\*, 35.6, 33.5, 31.0, 29.0\*, 26.7\*, 21.9\*, 20.8. IR (thin film)  $\nu_{\max}$  (cm<sup>-1</sup>) = 3028, 1725, 1619, 1437, 1333, 1273, 1237, 1212, 1185, 1132, 1089, 1004, 968, 880, 832, 793, 733. HRMS (ESI) calcd for C<sub>23</sub>H<sub>23</sub>O<sub>7</sub>Na<sup>79</sup>Br [M+Na]<sup>+</sup>: 513.0519. Found: 513.0514.

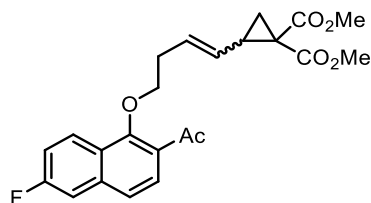

**1m**, brown oil, 0.33 g, 66% yield (1.2 mmol scale), *E/Z* = 4.6/1. <sup>1</sup>H NMR (400 MHz, CDCl<sub>3</sub>) δ 8.20-8.16 (m, 1H), 7.69-7.67 (m, 1H), 7.53-7.51 (m, 1H), 7.44-7.09 (m, 1H), 7.33-7.28 (m, 1H), 6.09-6.03 (m, 1H\*), 5.89-5.82 (m, 1H), 5.57-5.51 (m, 1H\*), 5.30-5.24 (m, 1H), 4.04-4.01 (m, 2H\*), 3.99-3.96 (m, 2H), 3.73 (s, 3H), 3.68 (s, 3H), 2.70 (s, 3H), 2.62-2.56 (s, 3H), 1.72-1.68 (m, 1H), 1.60-1.57 (m, 1H). <sup>13</sup>C NMR (100 MHz, CDCl<sub>3</sub>) δ 200.3, 170.1, 168.0, 163.5, 161.0, 156.2, 138.0, 137.9, 130.3, 128.2, 127.8, 127.0, 126.5, 126.4, 125.4, 123.5, 123.4, 117.1, 116.9, 111.5, 111.3, 52.8, 52.7, 35.6, 33.5, 30.9, 30.7, 20.9. <sup>19</sup>F NMR (376 MHz, CDCl<sub>3</sub>) δ -111.10 ~ -119.16 (m, 1F\*), -111.22 ~ -119.29 (m, 1F). IR (thin film)  $\nu_{\text{max}}$  (cm<sup>-1</sup>) = 2991, 1727, 1677, 1619, 1563, 1437, 1405, 1354, 1332, 1266, 1242, 1211, 1182, 1125, 1088, 1066, 967, 894, 829, 736, 701. HRMS (ESI) calcd for C<sub>23</sub>H<sub>23</sub>O<sub>6</sub>FNa [M+Na]<sup>+</sup>: 437.1371. Found: 437.1367.

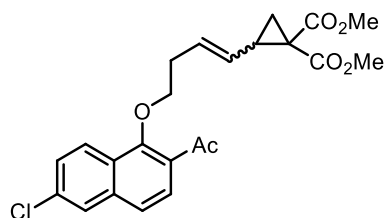

**1n**, yellow oil, 0.63 g, 49% yield (2.4 mmol scale), *E/Z* = 6.2/1. <sup>1</sup>H NMR (400 MHz, CDCl<sub>3</sub>) δ 8.02-7.99 (m, 1H), 7.67-7.66 (m, 1H), 7.58-7.56 (m, 1H), 7.38-7.35 (m, 2H), 5.81-5.73 (m, 1H), 5.70-5.67 (m, 1H\*), 5.50-5.44 (m, 1H\*), 5.23-5.18 (m, 1H), 3.89-3.85 (m, 2H), 3.65 (s, 3H), 3.61 (s, 3H), 2.61 (s, 3H), 2.53-2.50 (m, 3H), 1.64-1.61 (m, 1H), 1.52-1.48 (m, 1H). <sup>13</sup>C NMR (100 MHz, CDCl<sub>3</sub>) δ 199.7, 169.7, 167.6, 155.7, 137.0, 134.1, 130.1, 128.3, 127.9, 127.3, 126.7, 126.5, 126.4, 125.0, 122.9, 76.2, 52.5, 52.4, 35.4, 33.2, 30.6, 30.5, 20.5. IR (thin film)  $\nu_{\text{max}}$  (cm<sup>-1</sup>) = 2995, 1728, 1667, 1618, 1437, 1400, 135, 1332, 1267, 1242, 1212, 1182, 1126, 1078, 1066, 967, 894, 829, 736, 702. HRMS (ESI) calcd for C<sub>23</sub>H<sub>23</sub>O<sub>6</sub>Na<sup>35</sup>Cl [M+Na]<sup>+</sup>: 453.1075. Found: 453.1081.

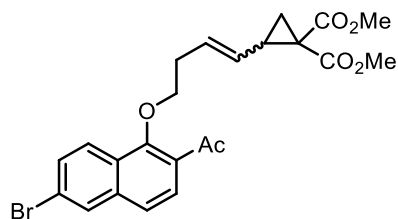

**1o**, yellow oil, 0.50 g, 56% yield (1.9 mmol scale), *E/Z* = 5.3/1. <sup>1</sup>H NMR (400 MHz, CDCl<sub>3</sub>) δ 8.02-7.99 (m, 1H), 7.95 (s, 1H), 7.65-7.63 (m, 1H), 7.59-7.56 (m, 1H), 7.47-7.45 (m, 1H), 5.87-5.79 (m, 1H), 5.77-5.70 (m, 1H\*), 5.50-5.44 (m, 1H), 5.15-5.09 (m, 1H\*), 3.96-3.93 (m, 2H), 3.71 (s, 3H), 3.67 (s, 3H), 2.68 (s, 3H), 2.60-2.54 (m, 3H), 1.70-1.67 (m, 1H), 1.58-1.55 (m, 1H). <sup>13</sup>C NMR (100 MHz, CDCl<sub>3</sub>) δ 200.2, 170.0, 167.9, 155.9, 137.6, 130.2, 130.05, 130.03, 128.6, 128.1, 126.8, 126.8, 125.2, 123.1, 122.8, 76.4, 52.8, 52.6, 35.6, 33.4, 30.8, 30.7, 20.8. IR (thin film)  $\nu_{\max}$  (cm<sup>-1</sup>) = 3040, 1729, 1675, 1616, 1437, 1405, 1354, 1332, 1266, 1242, 1211, 1182, 1125, 1088, 1066, 967, 894, 829, 736, 702. HRMS (ESI) calcd for C<sub>23</sub>H<sub>23</sub>O<sub>6</sub>Na<sup>79</sup>Br [M+Na]<sup>+</sup>: 498.3248. Found: 498.3254.

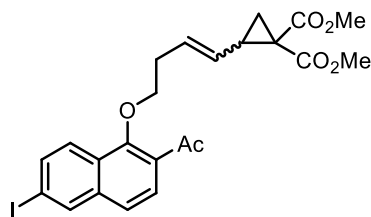

**1p**, yellow oil, 0.44 g, 53% yield (1.6 mmol scale), *E/Z* = 5.8/1. <sup>1</sup>H NMR (400 MHz, CDCl<sub>3</sub>) δ 8.19 (s, 1H), 7.89-7.87 (m, 1H), 7.78-7.75 (m, 1H), 7.66-7.64 (m, 1H), 7.45-7.43 (m, 1H), 5.91-5.84 (m, 1H), 5.82-5.75 (m, 1H\*), 5.33-5.28 (m, 1H), 5.19-5.15 (m, 1H\*), 3.98-3.95 (m, 2H), 3.75 (s, 3H), 3.71 (s, 3H), 2.71 (s, 3H), 2.62-2.58 (m, 3H), 1.74-1.70 (m, 1H), 1.62-1.58 (m, 1H). <sup>13</sup>C NMR (100 MHz, CDCl<sub>3</sub>) δ 199.6, 169.6, 167.5, 155.6, 137.5, 136.3, 134.9, 130.0, 128.4, 127.8, 126.8, 126.3, 124.7, 122.6, 94.7, 76.1, 52.4, 52.3, 35.3, 33.1, 30.43, 30.41, 20.4. IR (thin film)  $\nu_{\max}$  (cm<sup>-1</sup>) = 3021, 1721, 1676, 1614, 1436, 1329, 1272, 1240, 1210, 1181, 1124, 1077, 967, 879, 827, 743, 681. HRMS (ESI) calcd for C<sub>23</sub>H<sub>23</sub>O<sub>6</sub>NaI [M+Na]<sup>+</sup>: 545.0432. Found: 545.0428.

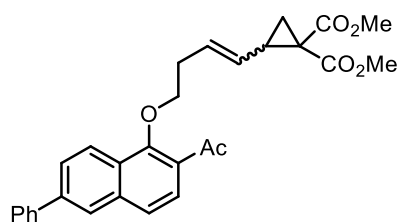

**1q**, yellow oil, 0.33 g, 63% yield (1.1 mmol scale), *E/Z* = 5/1.  $^1\text{H}$  NMR (400 MHz,  $\text{CDCl}_3$ )  $\delta$  8.27-8.25 (m, 1H), 8.031-8.026 (m, 1H), 7.84-7.81 (m, 1H), 7.74-7.70 (m, 3H), 7.67-7.65 (m, 1H), 7.52-7.48 (m, 2H), 7.43-7.38 (m, 1H), 5.94-5.86 (m, 1H), 5.85-5.78 (m, 1H\*), 5.34-5.28 (m, 1H), 5.20-5.14 (m, 1H\*), 4.06-4.02 (m, 2H), 3.74 (s, 3H), 3.71 (s, 3H), 2.75 (s, 3H), 2.67-2.59 (m, 3H), 1.75-1.72 (m, 1H), 1.62-1.59 (s, 1H).  $^{13}\text{C}$  NMR (100 MHz,  $\text{CDCl}_3$ )  $\delta$  200.6, 170.1, 168.0, 156.1, 141.1, 140.5, 137.2, 130.5, 129.1, 128.4, 128.1, 128.0, 127.51, 127.45, 126.4, 126.1, 125.9, 124.4, 124.2, 76.3, 52.8, 52.7, 35.7, 33.6, 31.0, 30.9, 20.9. IR (thin film)  $\nu_{\text{max}}$  ( $\text{cm}^{-1}$ ) = 3050, 1727, 1674, 1625, 1463, 1438, 1408, 1341, 1282, 1246, 1210, 1124, 1079, 1040, 1014, 967, 895, 838, 810, 760, 733, 697, 654. HRMS (ESI) calcd for  $\text{C}_{29}\text{H}_{28}\text{O}_6\text{Na}$   $[\text{M}+\text{Na}]^+$ : 495.1886. Found: 495.1808.

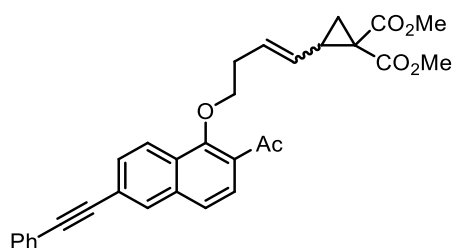

**1r**, yellow oil, 0.37 g, 65% yield (1.0 mmol scale), *E/Z* = 5.7/1.  $^1\text{H}$  NMR (400 MHz,  $\text{CDCl}_3$ )  $\delta$  8.17-8.14 (m, 1H), 8.030-8.026 (m, 1H), 7.74-7.70 (m, 2H), 7.59-7.57 (m, 3H), 7.38-7.36 (m, 3H), 5.91-5.84 (m, 1H), 5.82-5.76 (m, 1H\*), 5.32-5.26 (m, 1H), 5.19-5.13 (m, 1H\*), 4.02-3.99 (m, 2H), 3.75 (s, 3H), 3.71 (s, 3H), 2.73 (s, 3H), 2.64-2.58 (m, 3H), 1.74-1.71 (m, 1H), 1.62-1.59 (s, 1H).  $^{13}\text{C}$  NMR (100 MHz,  $\text{CDCl}_3$ )  $\delta$  200.5, 170.1, 168.0, 155.8, 136.4, 131.8, 131.4, 130.4, 129.3, 129.1, 128.7, 128.6, 128.2, 127.7, 126.4, 124.0, 123.6, 123.3, 123.0, 91.4, 89.3, 76.4, 52.8, 52.7, 35.7, 33.6, 30.9, 30.84, 20.9. IR (thin film)  $\nu_{\text{max}}$  ( $\text{cm}^{-1}$ ) = 3080, 1723, 1676, 1653, 1653, 1621, 1559, 1559, 1541, 1457, 1438, 1339, 1211, 1130, 1071, 968, 897, 837, 758, 733, 691. HRMS (ESI) calcd for  $\text{C}_{31}\text{H}_{28}\text{O}_6\text{Na}$   $[\text{M}+\text{Na}]^+$ : 519.1884. Found: 519.1806.



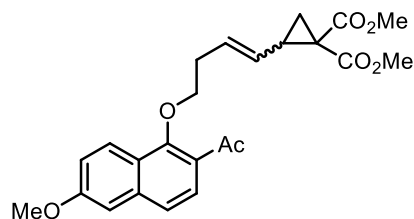

**1s**, yellow oil, 0.63 g, 37% yield (4.0 mmol scale),  $E/Z = 5.6/1$ .  $^1\text{H}$  NMR (400 MHz,  $\text{CDCl}_3$ )  $\delta$  8.05-8.03 (m, 1H), 7.65-7.62 (m, 1H), 7.44-7.41 (m, 1H), 7.16-7.13 (m, 1H), 7.07-7.06 (m, 1H), 5.87-5.79 (m, 1H), 5.77-5.72 (m, 1H\*), 5.57-5.50 (m, 1H\*), 5.27-5.21 (m, 1H), 3.96-3.92 (m, 2H), 3.87 (s, 3H), 3.70 (s, 3H), 3.66 (s, 3H), 2.67 (s, 3H), 2.60-2.53 (m, 3H), 1.69-1.66 (m, 1H), 1.57-1.54 (s, 1H).  $^{13}\text{C}$  NMR (100 MHz,  $\text{CDCl}_3$ )  $\delta$  199.8, 170.0, 167.8, 159.6, 156.4, 138.6, 130.4, 127.9, 126.4, 126.2, 125.2, 123.3, 122.8, 119.3, 106.0, 76.1, 55.3, 52.7, 52.5, 35.5, 33.4, 30.8, 30.6, 20.7. IR (thin film)  $\nu_{\text{max}}$  ( $\text{cm}^{-1}$ ) = 2996, 1725, 1670, 1622, 1474, 1437, 1416, 1340, 1272, 1243, 1210, 1129, 1078, 1025, 967, 856, 831, 801, 689. HRMS (ESI) calcd for  $\text{C}_{24}\text{H}_{26}\text{O}_7\text{Na}$   $[\text{M}+\text{Na}]^+$ : 449.1571. Found: 449.1570.

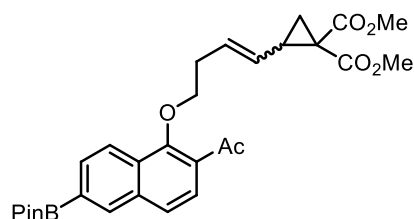

**1t**, yellow oil, 0.42 g, 52% yield (1.6 mmol scale),  $E/Z = 5.8/1$ .  $^1\text{H}$  NMR (400 MHz,  $\text{CDCl}_3$ )  $\delta$  8.34 (s, 1H), 8.18-8.13 (m, 1H), 7.91-7.89 (m, 1H), 7.74-7.53 (m, 2H), 5.89-5.82 (m, 1H), 5.78-5.76 (m, 1H\*), 5.30-5.24 (m, 1H), 4.12-3.97 (m, 2H), 3.73 (s, 3H), 3.69 (s, 3H), 2.72 (s, 3H), 2.62-2.55 (m, 3H), 1.72-1.69 (m, 1H), 1.60-1.57 (m, 1H), 1.38 (s, 12H).  $^{13}\text{C}$  NMR (100 MHz,  $\text{CDCl}_3$ )  $\delta$  200.8, 169.9, 167.8, 155.5, 136.0, 135.9, 131.2, 130.3, 129.7, 129.3, 127.9, 125.1, 124.7, 122.2, 84.1, 76.1, 52.6, 52.5, 35.5, 33.4, 30.8, 24.8, 20.7. IR (thin film)  $\nu_{\text{max}}$  ( $\text{cm}^{-1}$ ) = 3080, 1729, 1669, 1629, 1475, 1430, 1410, 1340, 1273, 1244, 1217, 1120, 1070, 1021, 966, 856, 832, 801, 688. HRMS (ESI) calcd for  $\text{C}_{29}\text{H}_{35}\text{BO}_8\text{Na}$   $[\text{M}+\text{Na}]^+$ : 545.2425. Found: 545.2419.

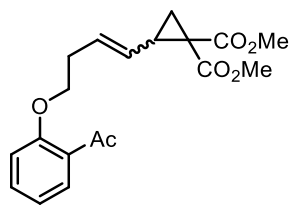

**9a** (prepared from the corresponding phenol derivatives), yellow oil, 0.34 g, 21% yield (4.7 mmol scale),  $E/Z = 7.8/1$ .  $^1\text{H NMR}$  (400 MHz,  $\text{CDCl}_3$ )  $\delta$  7.73 (d,  $J = 7.6$  Hz, 1H), 7.43 (t,  $J = 6.8$  Hz, 1H), 6.97 (t,  $J = 7.6$  Hz, 1H), 6.92 (d,  $J = 8.4$  Hz, 1H), 5.87-5.80 (m, 1H), 5.74-5.68 (m, 1H\*), 5.26 (dd,  $J = 15.6, 8.8$  Hz, 1H), 5.10-5.05 (m, 1H\*), 4.15-4.02 (m, 2H), 3.73 (s, 3H), 3.71 (s, 3H), 2.79-2.55 (m, 3H), 2.61 (s, 3H), 1.71-1.56 (m, 2H).  $^{13}\text{C NMR}$  (100 MHz,  $\text{CDCl}_3$ )  $\delta$  199.4, 169.7, 167.6, 157.9, 133.5, 130.4, 130.2, 127.9, 127.4, 120.4, 112.0, 67.6, 52.5, 52.3, 35.3, 32.2, 31.9, 30.6, 20.5. IR (thin film)  $\nu_{\text{max}}$  ( $\text{cm}^{-1}$ ) = 3089, 1727, 1663, 1620, 1470, 1431, 1418, 1347, 1273, 1244, 1215, 1126, 1077, 1027, 962, 856, 837, 805, 667. HRMS (ESI) calcd for  $\text{C}_{19}\text{H}_{22}\text{O}_6\text{Na}$   $[\text{M}+\text{Na}]^+$ : 369.1416. Found: 369.1512.

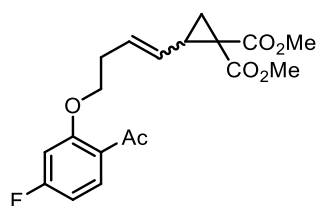

**9b** (prepared from the corresponding phenol derivatives), yellow oil, 0.32 g, 18% yield (5.0 mmol scale),  $E/Z = 8.3/1$ .  $^1\text{H NMR}$  (400 MHz,  $\text{CDCl}_3$ )  $\delta$  7.80-7.76 (m, 1H), 6.67-6.57 (m, 2H), 5.82-5.75 (m, 1H), 5.69-5.63 (m, 1H\*), 5.26-5.20 (m, 1H), 5.08-5.03 (m, 1H\*), 4.02-3.99 (m, 2H), 3.70 (s, 3H), 3.69 (s, 3H), 2.75-2.30 (m, 6H), 1.66-1.63 (m, 1H), 1.57-1.53 (m, 1H).  $^{13}\text{C NMR}$  (100 MHz,  $\text{CDCl}_3$ )  $\delta$  197.7, 169.9, 167.9, 167.5, 165.0, 160.1, 160.0, 132.9, 132.8, 130.2, 129.9, 128.1, 127.6, 124.4, 124.3, 107.8, 107.6, 100.3, 100.3, 100.1, 100.0, 68.31, 68.1, 52.9, 52.8, 52.7, 52.6, 35.7, 35.6, 32.3, 32.2, 32.1, 30.8, 27.8, 26.5, 21.8, 20.8.  $^{19}\text{F NMR}$  (376 MHz,  $\text{CDCl}_3$ )  $\delta$  -103.7 ~ -103.8 (m, 1F). IR (thin film)  $\nu_{\text{max}}$  ( $\text{cm}^{-1}$ ) = 3100, 1740, 1669, 1621, 1479, 1439, 1418, 1346, 1273, 1241, 1211, 1122, 1073, 1024, 958, 840, 830, 801, 651. HRMS (ESI) calcd for  $\text{C}_{19}\text{H}_{21}\text{FO}_6\text{Na}$   $[\text{M}+\text{Na}]^+$ : 387.1322. Found: 387.1316.

## 2.2 Procedure for the dearomative [5 + 4] cycloadditions of naphthalene derivatives (using **1a** as an example)

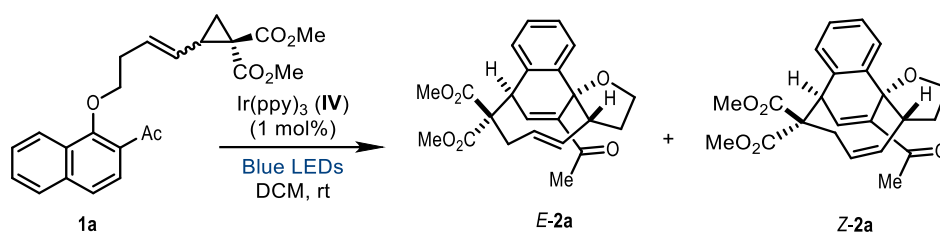

To a flame-dried sealed tube were added **1a** (79 mg, 0.2 mmol), photosensitizer **IV** (1.3 mg, 0.002 mmol) and anhydrous DCM (2.0 mL). The reaction mixture was degassed *via* freeze-pump-thaw for 3 cycles. After the reaction mixture was thoroughly degassed, the vial was sealed and positioned approximately 10 cm from blue LEDs (24 W,  $\lambda_{\max}$  = 455 nm). Then the reaction mixture was stirred at room temperature for 24 h (monitored by TLC) under argon atmosphere. Afterwards, the reaction mixture was concentrated by rotary evaporation. Then, the residue was purified by silica gel column chromatography (petroleum ether/acetone = 6/1) to afford the desired major product **E-2a** and minor product **Z-2a**.

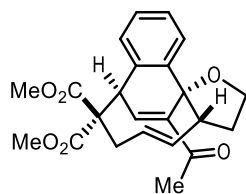

**E-2a**, white solid, 68.1 mg, 86% yield, m.p. = 124.9-126.6 °C, *E/Z* = 7.7/1. <sup>1</sup>H NMR (400 MHz, CDCl<sub>3</sub>)  $\delta$  7.54 (d, *J* = 8.0 Hz, 1H), 7.33 (t, *J* = 7.2 Hz, 1H), 7.16 (t, *J* = 7.2 Hz, 1H), 6.94 (d, *J* = 8.0 Hz, 1H), 6.79 (d, *J* = 5.6 Hz, 1H), 5.29 (dd, *J* = 16.0, 8.4 Hz, 1H), 5.13-5.05 (m, 1H), 4.54 (d, *J* = 5.6 Hz, 1H), 4.39 (t, *J* = 8.0 Hz, 1H), 4.31-4.24 (m, 1H), 3.84 (s, 3H), 3.79 (s, 3H), 3.07 (dd, *J* = 12.8, 2.8 Hz, 1H), 2.60-2.48 (m, 2H), 2.33 (s, 3H), 2.22 (t, *J* = 12.4 Hz, 1H), 2.13-2.09 (m, 1H). <sup>13</sup>C NMR (100 MHz, CDCl<sub>3</sub>)  $\delta$  202.3, 171.3, 171.0, 147.9, 143.3, 135.3, 134.2, 133.3, 127.9, 126.6, 126.4, 126.3, 124.4, 89.1, 72.3, 68.5, 55.4, 52.8, 52.5, 44.3, 39.0, 30.5, 29.8. IR (thin film)  $\nu_{\max}$  (cm<sup>-1</sup>) = 2957, 2922, 2855, 1729, 1694, 1482, 1434, 1358, 1259, 1228, 1179, 1131, 1041, 999,

899, 845, 789, 764. HRMS (ESI) calcd for C<sub>23</sub>H<sub>24</sub>O<sub>6</sub>Na [M+Na]<sup>+</sup>: 419.1465. Found: 419.1467.

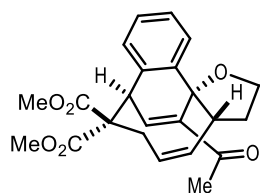

**Z-2a**, colorless oil, 7.7 mg, 10% yield. <sup>1</sup>H NMR (400 MHz, CDCl<sub>3</sub>) δ 7.58 (dd, *J* = 8.0, 1.4 Hz, 1H), 7.35 (td, *J* = 7.6, 1.3 Hz, 1H), 7.26 (d, *J* = 6.4 Hz, 1H), 7.15 (td, *J* = 7.6, 1.3 Hz, 1H), 6.78-6.70 (m, 1H), 5.50-5.46 (m, 1H), 5.43-5.36 (m, 1H), 4.53 (d, *J* = 6.4 Hz, 1H), 4.50-4.33 (m, 2H), 3.83 (s, 3H), 3.80 (s, 3H), 3.27-3.14 (m, 1H), 2.74-2.62 (m, 1H), 2.55-2.40 (m, 2H), 2.25 (s, 3H), 1.85-1.73 (m, 1H). <sup>13</sup>C NMR (100 MHz, CDCl<sub>3</sub>) δ 199.5, 170.6, 169.7, 147.3, 147.0, 138.8, 135.4, 130.8, 128.3, 127.2, 126.4, 126.0, 124.5, 88.2, 71.9, 65.0, 54.7, 53.0, 52.8, 44.6, 34.6, 30.2, 28.8. IR (thin film) ν<sub>max</sub> (cm<sup>-1</sup>) = 2991, 1722, 1599, 1551, 1390, 1292, 1241, 1166, 913, 783, 720. HRMS (ESI) calcd for C<sub>23</sub>H<sub>24</sub>O<sub>6</sub>Na [M+Na]<sup>+</sup>: 419.1573. Found: 419.1565.

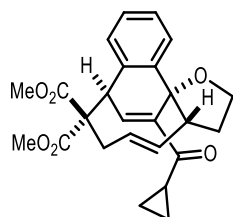

**E-2b**, yellow oil, 61.9 mg, 74% yield, *E/Z* = 7.2/1. <sup>1</sup>H NMR (400 MHz, CDCl<sub>3</sub>) δ 7.56 (d, *J* = 8.0 Hz, 1H), 7.34 (t, *J* = 7.2 Hz, 1H), 7.17 (t, *J* = 7.2 Hz, 1H), 6.96 (d, *J* = 7.6 Hz, 1H), 6.78 (d, *J* = 5.2 Hz, 1H), 5.34 (dd, *J* = 16.0, 9.2 Hz, 1H), 5.14-5.06 (m, 1H), 4.57 (d, *J* = 5.2 Hz, 1H), 4.37-4.24 (m, 2H), 3.84 (s, 3H), 3.80 (s, 3H), 3.07 (dd, *J* = 12.8, 2.8 Hz, 1H), 2.57-2.46 (m, 2H), 2.31-2.23 (m, 2H), 2.16-2.08 (m, 1H), 1.13-1.05 (m, 2H), 0.97-0.86 (m, 2H). <sup>13</sup>C NMR (100 MHz, CDCl<sub>3</sub>) δ 205.3, 171.6, 171.1, 148.9, 143.3, 135.6, 134.6, 132.1, 128.0, 126.7, 126.6, 126.3, 124.5, 89.2, 72.2, 68.7, 55.3, 52.9, 52.6, 44.4, 39.1, 29.9, 21.1, 12.1, 12.0. IR (thin film) ν<sub>max</sub> (cm<sup>-1</sup>) = 3005, 2929, 2859, 1727, 1671, 1481, 1433, 1339, 1228, 1201, 1177, 1127, 1042, 998, 895, 820, 786, 763. HRMS (ESI) calcd for C<sub>25</sub>H<sub>26</sub>O<sub>6</sub>Na [M+Na]<sup>+</sup>: 445.1622. Found: 445.1621.

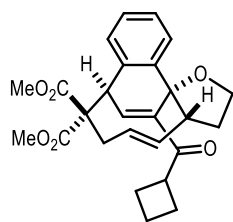

*E*-**2c**, yellow solid, 70.2 mg, 74% yield, m.p. = 147.5-149.1 °C, *E/Z* = 6.7/1. <sup>1</sup>H NMR (400 MHz, CDCl<sub>3</sub>) δ 7.54 (d, *J* = 7.6 Hz, 1H), 7.33 (t, *J* = 7.2 Hz, 1H), 7.16 (t, *J* = 7.2 Hz, 1H), 6.93 (d, *J* = 7.6 Hz, 1H), 6.66 (d, *J* = 5.6 Hz, 1H), 5.31 (dd, *J* = 16.0, 9.6 Hz, 1H), 5.12-5.04 (m, 1H), 4.50 (d, *J* = 5.6 Hz, 1H), 4.40 (t, *J* = 8.4 Hz, 1H), 4.31-4.25 (m, 1H), 3.84 (s, 3H), 3.79 (s, 3H), 3.68-3.59 (m, 1H), 3.07 (dd, *J* = 12.4, 2.8 Hz, 1H), 2.71-2.60 (m, 1H), 2.56-2.48 (m, 1H), 2.33-2.26 (m, 1H), 2.24-2.00 (m, 5H), 1.97-1.86 (m, 1H), 1.81-1.72 (m, 1H). <sup>13</sup>C NMR (100 MHz, CDCl<sub>3</sub>) δ 205.4, 171.5, 171.2, 146.9, 143.5, 135.6, 134.4, 132.7, 128.0, 126.6, 126.5, 126.3, 124.6, 89.2, 72.5, 68.6, 55.6, 52.9, 52.6, 44.9, 44.4, 39.2, 29.8, 25.1, 24.8, 17.5. IR (thin film)  $\nu_{\text{max}}$  (cm<sup>-1</sup>) = 2950, 2857, 1728, 1677, 1433, 1233, 1210, 1182, 1131, 1064, 1042, 1002, 959, 931, 896, 824, 790, 763. HRMS (ESI) calcd for C<sub>26</sub>H<sub>28</sub>O<sub>6</sub>Na [M+Na]<sup>+</sup>: 459.1778. Found: 459.1779.

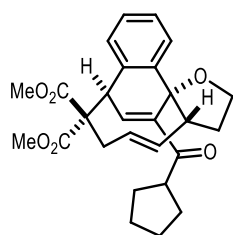

*E*-**2d**, white solid, 64.0 mg, 71% yield, m.p. = 156.2-157.3 °C, *E/Z* = 7.0/1. <sup>1</sup>H NMR (400 MHz, CDCl<sub>3</sub>) δ 7.53 (d, *J* = 8.0 Hz, 1H), 7.33 (t, *J* = 7.6 Hz, 1H), 7.17 (t, *J* = 7.6 Hz, 1H), 6.95 (d, *J* = 8.0 Hz, 1H), 6.61 (d, *J* = 5.2 Hz, 1H), 5.37 (dd, *J* = 16.0, 9.6 Hz, 1H), 5.13-5.05 (m, 1H), 4.52 (d, *J* = 5.6 Hz, 1H), 4.33-4.23 (m, 2H), 3.84 (s, 3H), 3.79 (s, 3H), 3.33-3.25 (m, 1H), 3.06 (dd, *J* = 12.8, 2.8 Hz, 1H), 2.72-2.61 (m, 1H), 2.56-2.49 (m, 1H), 2.23 (t, *J* = 12.4 Hz, 1H), 2.12-2.06 (m, 1H), 1.94-1.85 (m, 1H), 1.76-1.62 (m, 4H), 1.61-1.47 (m, 3H). <sup>13</sup>C NMR (100 MHz, CDCl<sub>3</sub>) δ 208.0, 171.6, 171.2, 148.7, 143.5, 135.6, 134.5, 131.0, 128.0, 126.6, 126.5, 126.3, 124.5, 89.4, 72.4, 68.6, 55.7, 52.9, 52.6, 50.7, 44.3, 39.1, 29.9, 29.7, 28.2, 26.0, 25.7. IR (thin film)  $\nu_{\text{max}}$  (cm<sup>-1</sup>) = 2952, 2852, 1731, 1681, 1429, 1229, 1207, 1182, 1043, 990, 950, 899, 820, 788, 762, 713, 680, 646. HRMS (ESI) calcd for C<sub>27</sub>H<sub>30</sub>O<sub>6</sub>Na [M+Na]<sup>+</sup>: 473.1935. Found: 473.1929.

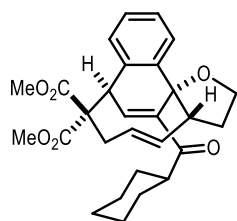

**E-2e**, yellow oil, 35.6 mg, 38% yield, *E/Z* = 8.6/1.  $^1\text{H}$  NMR (400 MHz,  $\text{CDCl}_3$ )  $\delta$  7.52 (d,  $J$  = 8.0 Hz, 1H), 7.33 (t,  $J$  = 7.2 Hz, 1H), 7.17 (t,  $J$  = 7.6 Hz, 1H), 6.95 (d,  $J$  = 8.0 Hz, 1H), 6.48 (d,  $J$  = 5.2 Hz, 1H), 5.42 (dd,  $J$  = 16.0, 9.6 Hz, 1H), 5.12-5.05 (m, 1H), 4.52 (d,  $J$  = 5.2 Hz, 1H), 4.30-4.21 (m, 2H), 3.84 (s, 3H), 3.79 (s, 3H), 3.06 (dd,  $J$  = 12.8, 2.8 Hz, 1H), 2.74-2.58 (m, 2H), 2.55-2.48 (m, 1H), 2.24 (t,  $J$  = 12.4 Hz, 1H), 2.11-2.05 (m, 1H), 1.83-1.61 (m, 6H), 1.43-1.34 (m, 1H), 1.23-1.10 (m, 3H).  $^{13}\text{C}$  NMR (100 MHz,  $\text{CDCl}_3$ )  $\delta$  209.6, 171.6, 171.3, 148.3, 143.4, 135.7, 134.6, 129.4, 128.0, 126.6, 126.5, 126.3, 124.6, 89.4, 72.3, 68.7, 55.7, 52.9, 52.6, 50.1, 44.3, 39.1, 29.7, 29.0, 27.9, 25.9, 25.9, 25.3. IR (thin film)  $\nu_{\text{max}}$  ( $\text{cm}^{-1}$ ) = 2925, 2850, 1733, 1687, 1446, 1433, 1231, 1205, 1183, 1069, 998, 945, 821, 788, 755, 732, 678, 645. HRMS (ESI) calcd for  $\text{C}_{28}\text{H}_{32}\text{O}_6\text{Na}$  [ $\text{M}+\text{Na}$ ] $^+$ : 487.2091. Found: 487.2088.

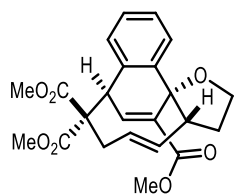

**E-2f**, yellow oil, 66.5 mg, 80% yield, *E/Z* = 7.1/1.  $^1\text{H}$  NMR (400 MHz,  $\text{CDCl}_3$ )  $\delta$  7.55 (d,  $J$  = 8.4 Hz, 1H), 7.32 (t,  $J$  = 8.0 Hz, 1H), 7.15 (t,  $J$  = 7.6 Hz, 1H), 7.07 (d,  $J$  = 5.6 Hz, 1H), 6.91 (d,  $J$  = 8.0 Hz, 1H), 5.31 (dd,  $J$  = 16.0, 9.2 Hz, 1H), 5.16-5.08 (m, 1H), 4.53-4.47 (m, 2H), 4.34-4.28 (m, 1H), 3.84 (s, 3H), 3.80 (s, 3H), 3.75 (s, 3H), 3.09 (dd,  $J$  = 12.8, 2.8 Hz, 1H), 2.69-2.53 (m, 2H), 2.24 (t,  $J$  = 12.4 Hz, 1H), 2.17-2.13 (m, 1H).  $^{13}\text{C}$  NMR (100 MHz,  $\text{CDCl}_3$ )  $\delta$  171.5, 171.0, 167.0, 143.4, 139.2, 136.8, 135.4, 134.3, 128.0, 127.0, 126.41, 126.39, 124.5, 89.0, 72.6, 68.6, 55.4, 52.9, 52.6, 51.8, 44.5, 39.2, 30.0. IR (thin film)  $\nu_{\text{max}}$  ( $\text{cm}^{-1}$ ) = 2952, 2857, 1729, 1708, 1435, 1340, 1272, 1231, 1205, 1132, 1066, 1040, 996, 968, 817, 788, 763, 699, 677, 644. HRMS (ESI) calcd for  $\text{C}_{23}\text{H}_{24}\text{O}_7\text{Na}$  [ $\text{M}+\text{Na}$ ] $^+$ : 435.1414. Found: 435.1415.

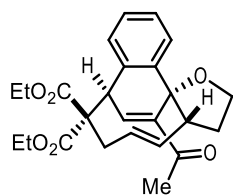

*E*-**2g**, yellow oil, 61.2 mg, 72% yield, *E/Z* = 6.3/1.  $^1\text{H}$  NMR (400 MHz,  $\text{CDCl}_3$ )  $\delta$  7.54 (d,  $J$  = 8.0 Hz, 1H), 7.33 (t,  $J$  = 8.0 Hz, 1H), 7.15 (t,  $J$  = 8.0 Hz, 1H), 7.01 (d,  $J$  = 8.0 Hz, 1H), 6.82 (d,  $J$  = 5.2 Hz, 1H), 5.28 (dd,  $J$  = 16.0, 8.8 Hz, 1H), 5.13-5.06 (m, 1H), 4.54 (d,  $J$  = 5.2 Hz, 1H), 4.42-4.36 (m, 2H), 4.32-4.18 (m, 4H), 3.08 (dd,  $J$  = 12.8, 2.8 Hz, 1H), 2.59-2.49 (m, 2H), 2.34 (s, 3H), 2.21 (t,  $J$  = 12.4 Hz, 1H), 2.14-2.08 (m, 1H), 1.30 (q,  $J$  = 7.2 Hz, 6H).  $^{13}\text{C}$  NMR (100 MHz,  $\text{CDCl}_3$ )  $\delta$  202.5, 171.1, 170.7, 147.9, 143.4, 135.3, 134.5, 133.8, 128.0, 126.9, 126.6, 126.3, 124.4, 89.3, 72.4, 68.7, 61.8, 55.6, 44.2, 39.2, 30.6, 30.0, 29.6, 14.0, 13.8. IR (thin film)  $\nu_{\text{max}}$  ( $\text{cm}^{-1}$ ) = 2920, 2852, 1726, 1685, 1446, 1363, 1245, 1225, 1131, 1095, 938, 905, 888, 870, 780, 757, 710, 675. HRMS (ESI) calcd for  $\text{C}_{25}\text{H}_{28}\text{O}_6\text{Na}$  [ $\text{M}+\text{Na}$ ] $^+$ : 447.1778. Found: 447.1774.

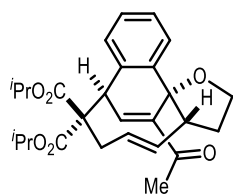

*E*-**2h**, yellow oil, 63.9 mg, 70% yield, *E/Z* = 8/1.  $^1\text{H}$  NMR (400 MHz,  $\text{CDCl}_3$ )  $\delta$  7.54 (d,  $J$  = 8.0 Hz, 1H), 7.33 (t,  $J$  = 8.4 Hz, 1H), 7.17-7.10 (m, 2H), 6.84 (d,  $J$  = 5.2 Hz, 1H), 5.27 (dd,  $J$  = 16.0, 8.8 Hz, 1H), 5.19-5.05 (m, 3H), 4.52 (d,  $J$  = 5.6 Hz, 1H), 4.42-4.38 (m, 1H), 4.31-4.24 (m, 1H), 3.07 (dd,  $J$  = 12.8, 2.8 Hz, 1H), 2.63-2.48 (m, 2H), 2.33 (s, 3H), 2.19-2.09 (m, 2H), 1.40 (d,  $J$  = 6.4 Hz, 3H), 1.28 (d,  $J$  = 6.4 Hz, 6H), 1.24 (d,  $J$  = 6.4 Hz, 3H).  $^{13}\text{C}$  NMR (100 MHz,  $\text{CDCl}_3$ )  $\delta$  202.5, 170.7, 170.2, 147.7, 143.4, 135.1, 134.6, 134.2, 127.9, 127.1, 126.8, 126.2, 124.4, 72.4, 70.0, 69.9, 69.3, 68.9, 55.6, 44.1, 39.4, 30.6, 30.0, 21.6, 21.5, 21.4. IR (thin film)  $\nu_{\text{max}}$  ( $\text{cm}^{-1}$ ) = 2980, 2936, 2861, 1724, 1682, 1447, 1372, 1232, 1208, 1181, 1047, 941, 911, 833, 789, 757, 707, 682. HRMS (ESI) calcd for  $\text{C}_{27}\text{H}_{32}\text{O}_6\text{Na}$  [ $\text{M}+\text{Na}$ ] $^+$ : 475.2091. Found: 475.2083.

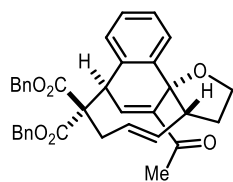

**E-2i**, yellow oil, 87.5 mg, 80% yield,  $E/Z = 8.8/1$ .  $^1\text{H NMR}$  (400 MHz,  $\text{CDCl}_3$ )  $\delta$  7.52 (d,  $J = 8.0$  Hz, 1H), 7.34-7.24 (m, 10H), 7.00 (t,  $J = 8.0$  Hz, 1H), 6.92 (d,  $J = 7.2$  Hz, 1H), 6.80 (d,  $J = 5.6$  Hz, 1H), 5.31-5.25 (m, 2H), 5.15-5.06 (m, 4H), 4.57 (d,  $J = 5.6$  Hz, 1H), 4.41-4.37 (m, 1H), 4.29-4.23 (m, 1H), 3.13 (dd,  $J = 12.8, 2.8$  Hz, 1H), 2.60-2.46 (m, 2H), 2.30 (s, 3H), 2.25-2.16 (m, 1H), 2.15-2.02 (m, 1H).  $^{13}\text{C NMR}$  (100 MHz,  $\text{CDCl}_3$ )  $\delta$  202.4, 170.7, 170.3, 148.1, 143.3, 135.4, 135.0, 134.5, 134.2, 133.4, 128.6, 128.54, 128.47, 128.4, 128.1, 128.0, 126.8, 126.6, 126.3, 124.4, 89.2, 72.4, 68.9, 67.5, 67.4, 55.6, 44.2, 39.3, 30.6, 29.9. IR (thin film)  $\nu_{\text{max}}$  ( $\text{cm}^{-1}$ ) = 2928, 2882, 1730, 1688, 1497, 1453, 1361, 1284, 1219, 1181, 1041, 997, 910, 844, 754, 733, 692, 620. HRMS (ESI) calcd for  $\text{C}_{35}\text{H}_{32}\text{O}_6\text{Na}$   $[\text{M}+\text{Na}]^+$ : 571.2091. Found: 571.2085.

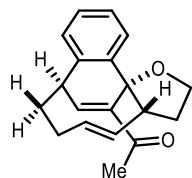

**E-2j**, colorless oil, 39.1 mg, 70% yield,  $E/Z = 2.6/1$ .  $^1\text{H NMR}$  (400 MHz,  $\text{CDCl}_3$ )  $\delta$  7.56-7.49 (m, 1H), 7.35-7.11 (m, 3H), 6.74 (d,  $J = 6.4$  Hz, 1H\*), 6.51 (d,  $J = 5.2$  Hz, 1H), 5.63-5.56 (m, 1H\*), 5.29 (dd,  $J = 10.8, 6.4$  Hz, 1H\*), 5.09 (dd,  $J = 16.0, 9.6$  Hz, 1H), 4.73-4.65 (m, 1H), 4.51-4.24 (m, 2H), 3.91-3.59 (m, 1H), 3.09-3.02 (m, 2H\*), 2.68-2.54 (m, 2H), 2.44-2.23 (m, 2H), 2.34 (s, 3H), 2.25 (s, 3H\*), 2.19-2.03 (m, 2H), 1.96-1.88 (m, 1H\*), 1.79-1.72 (m, 1H).  $^{13}\text{C NMR}$  (100 MHz,  $\text{CDCl}_3$ )  $\delta$  201.6, 198.9, 146.2, 144.9, 144.5, 141.1, 140.1, 139.2, 137.6, 135.1, 134.8, 132.5, 132.0, 130.8, 127.3, 127.0, 126.5, 126.1, 125.6, 123.69, 123.67, 89.9, 89.0, 72.2, 72.0, 57.0, 55.5, 40.6, 40.3, 39.0, 34.7, 34.3, 32.1, 30.11, 30.09, 28.5, 24.4. IR (thin film)  $\nu_{\text{max}}$  ( $\text{cm}^{-1}$ ) = 2923, 2844, 1676, 1478, 1451, 1373, 1254, 1219, 1183, 1123, 1045, 999, 937, 854, 753, 708, 669, 615. HRMS (ESI) calcd for  $\text{C}_{19}\text{H}_{20}\text{O}_2\text{Na}$   $[\text{M}+\text{Na}]^+$ : 303.1356. Found: 303.1356.

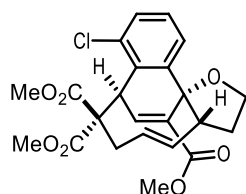

**E-2k**, white foam, 72.4 mg, 81% yield,  $E/Z = 5.3/1$ .  $^1\text{H NMR}$  (400 MHz,  $\text{CDCl}_3$ )  $\delta$  7.50-7.48 (m, 1H), 7.32-7.24 (m, 2H), 6.69 (d,  $J = 5.6$  Hz, 1H), 5.54-5.46 (m, 1H), 5.38-5.32 (m, 1H), 5.14 (d,  $J = 6.0$  Hz, 1H), 4.48 (t,  $J = 8.4$  Hz, 1H), 4.36-4.30 (m, 1H), 3.90



(s, 3H), 3.74 (s, 3H), 3.72 (s, 3H), 2.90-2.83 (m, 1H), 2.79-2.74 (m, 1H), 2.72-2.63 (m, 1H), 2.59-2.53 (m, 1H), 2.23-2.17 (m, 1H).  $^{13}\text{C}$  NMR (100 MHz,  $\text{CDCl}_3$ )  $\delta$  171.8, 171.5, 166.8, 147.2, 139.6, 136.4, 136.2, 134.8, 133.0, 129.0, 127.7, 127.1, 123.9, 89.8, 72.9, 66.5, 55.4, 53.4, 53.1, 52.1, 42.7, 40.9, 30.2. IR (thin film)  $\nu_{\text{max}}$  ( $\text{cm}^{-1}$ ) = 1727, 1435, 1249, 1211, 1183, 1049, 1005, 912, 778, 732, 701, 646. HRMS (ESI) calcd for  $\text{C}_{23}\text{H}_{23}\text{O}_7\text{Na}^{35}\text{Cl}$   $[\text{M}+\text{Na}]^+$ : 469.1025. Found: 469.1027.

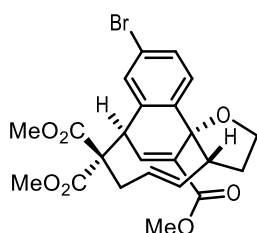

*E*-2l, white foam, 79.6 mg, 81% yield, *E/Z* = 5.6/1.  $^1\text{H}$  NMR (400 MHz,  $\text{CDCl}_3$ )  $\delta$  7.422-7.417 (m, 2H), 7.08 (s, 1H), 7.03 (d,  $J$  = 5.2 Hz, 1H), 5.30-5.23 (m, 1H), 5.14-5.07 (m, 1H), 4.49-4.43 (m, 2H), 4.30-4.24 (m, 1H), 3.88 (s, 3H), 3.79 (s, 3H), 3.73 (s, 3H), 3.08 (d,  $J$  = 15.2 Hz, 1H), 2.56-2.46 (m, 2H), 2.25-2.10 (m, 2H).  $^{13}\text{C}$  NMR (100 MHz,  $\text{CDCl}_3$ )  $\delta$  171.3, 170.8, 166.8, 142.7, 139.0, 136.6, 135.5, 131.1, 129.7, 127.2, 126.5, 120.6, 89.0, 72.8, 68.7, 55.5, 53.2, 53.0, 52.1, 44.4, 39.3, 30.1. IR (thin film)  $\nu_{\text{max}}$  ( $\text{cm}^{-1}$ ) = 1734, 1688, 1435, 1235, 1212, 1182, 1047, 1003, 911, 822, 733, 650. HRMS (ESI) calcd for  $\text{C}_{23}\text{H}_{23}\text{O}_7\text{Na}^{79}\text{Br}$   $[\text{M}+\text{H}]^+$ : 513.0519. Found: 513.0518.

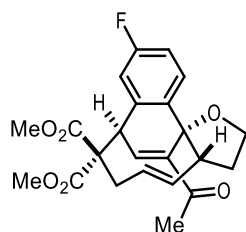

*E*-2m, white solid, 58.7 mg, 71% yield, m.p. = 153.5-155.1 °C, *E/Z* = 6.1/1.  $^1\text{H}$  NMR (400 MHz,  $\text{CDCl}_3$ )  $\delta$  7.52-7.48 (m, 1H), 7.05-7.00 (m, 1H), 6.75 (d,  $J$  = 5.6 Hz, 1H), 6.64 (dd,  $J$  = 10.8, 2.8 Hz, 1H), 5.29-5.22 (m, 1H), 5.10-5.02 (m, 1H), 4.47 (d,  $J$  = 5.6 Hz, 1H), 4.37 (t,  $J$  = 7.6 Hz, 1H), 4.27-4.21 (m, 1H), 3.86 (s, 3H), 3.78 (s, 3H), 3.07 (dd,  $J$  = 12.8, 2.8 Hz, 1H), 2.53-2.41 (m, 2H), 2.32 (s, 3H), 2.26-2.17 (m, 1H), 2.12-2.06 (m, 1H).  $^{13}\text{C}$  NMR (100 MHz,  $\text{CDCl}_3$ )  $\delta$  202.4, 171.3, 171.1, 161.4 (d,  $J$  = 243.5 Hz), 148.2, 139.4 (d,  $J$  = 2.9 Hz), 136.5 (d,  $J$  = 7.3 Hz), 135.6, 133.2, 126.7, 126.5 (d,  $J$  = 8.2 Hz), 115.4 (d,  $J$  = 21.1 Hz), 113.2 (d,  $J$  = 22.3 Hz), 89.3, 72.5, 68.7, 55.8, 53.1,

52.9, 44.5 (d,  $J = 1.8$  Hz), 39.2, 30.7, 30.0.  $^{19}\text{F}$  NMR (376 MHz,  $\text{CDCl}_3$ )  $\delta$  -116.15 ~ -116.21 (m, 1F), IR (thin film)  $\nu_{\text{max}}$  ( $\text{cm}^{-1}$ ) = 1735, 1691, 1491, 1437, 1233, 1047, 914, 823, 732, 652. HRMS (ESI) calcd for  $\text{C}_{23}\text{H}_{23}\text{O}_6\text{FNa}$   $[\text{M}+\text{Na}]^+$ : 437.1371. Found: 437.1377.

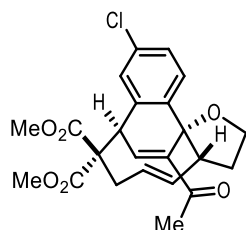

*E*-**2n**, white solid, 56.7 mg, 66% yield, m.p. = 139.2-140.4 °C,  $E/Z = 5.0/1$ .  $^1\text{H}$  NMR (400 MHz,  $\text{CDCl}_3$ )  $\delta$  7.48-7.46 (m, 1H), 7.31-7.29 (m, 1H), 6.95-6.94 (m, 1H), 6.76-6.75 (m, 1H), 5.29-5.23 (m, 1H), 5.12-5.04 (m, 1H), 4.47 (d,  $J = 5.2$  Hz, 1H), 4.38 (t,  $J = 8.0$  Hz, 1H), 4.28-4.18 (m, 1H), 3.88 (s, 3H), 3.79 (s, 3H), 3.07 (dd,  $J = 13.2, 2.8$  Hz, 1H), 2.56-2.44 (m, 2H), 2.33 (s, 3H), 2.23-2.17 (m, 1H), 2.14-2.08 (m, 1H).  $^{13}\text{C}$  NMR (100 MHz,  $\text{CDCl}_3$ )  $\delta$  202.3, 171.3, 171.1, 148.0, 142.2, 136.3, 135.6, 133.3, 132.5, 128.3, 126.9, 126.8, 126.3, 89.2, 72.7, 68.8, 55.7, 53.2, 53.0, 44.4, 39.2, 30.8, 30.0. IR (thin film)  $\nu_{\text{max}}$  ( $\text{cm}^{-1}$ ) = 1733, 1683, 1438, 1237, 1215, 1047, 1005, 894, 851, 823, 732, 681, 648, 625. HRMS (ESI) calcd for  $\text{C}_{23}\text{H}_{23}\text{O}_6\text{Na}^{35}\text{Cl}$   $[\text{M}+\text{Na}]^+$ : 453.1075. Found: 453.1072.

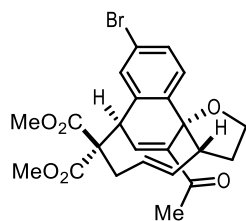

*E*-**2o**, white solid, 77.8 mg, 82% yield, m.p. = 144.6-144.9 °C,  $E/Z = 8.2/1$ .  $^1\text{H}$  NMR (400 MHz,  $\text{CDCl}_3$ )  $\delta$  7.45-7.38 (m, 2H), 7.10-7.09 (m, 1H), 6.75-6.73 (m, 1H), 5.28-5.21 (m, 1H), 5.11-5.04 (m, 1H), 4.46 (d,  $J = 5.2$  Hz, 1H), 4.37 (t,  $J = 8.0$  Hz, 1H), 4.27-4.20 (m, 1H), 3.88 (s, 3H), 3.78 (s, 3H), 3.06 (dd,  $J = 12.8, 2.4$  Hz, 1H), 2.54-2.44 (m, 2H), 2.32 (s, 3H), 2.22-2.16 (m, 1H), 2.12-2.07 (m, 1H).  $^{13}\text{C}$  NMR (100 MHz,  $\text{CDCl}_3$ )  $\delta$  202.2, 171.3, 171.0, 147.9, 142.7, 136.6, 135.6, 133.3, 131.2, 129.7, 126.9, 126.5, 120.6, 89.2, 72.6, 68.8, 55.6, 53.2, 53.0, 44.3, 39.2, 30.7, 30.0. IR (thin film)  $\nu_{\text{max}}$  ( $\text{cm}^{-1}$ ) =

$^1$ ) = 1734, 1688, 1435, 1235, 1212, 1182, 1047, 1003, 911, 822, 733, 650. HRMS (ESI) calcd for  $C_{23}H_{23}O_6Na^{79}Br$   $[M+Na]^+$ : 497.0570. Found: 497.0577.

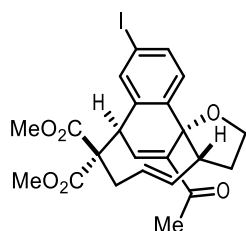

**E-2p**, white foam, 77.3 mg, 74% yield,  $E/Z = 7.7/1$ .  $^1H$  NMR (400 MHz,  $CDCl_3$ )  $\delta$  7.62-7.60 (m, 1H), 7.31-7.30 (m, 1H), 7.24 (s, 1H), 6.70 (d,  $J = 5.2$  Hz, 1H), 5.27-5.21 (m, 1H), 5.12-5.04 (m, 1H), 4.44 (d,  $J = 5.6$  Hz, 1H), 4.36 (t,  $J = 8.0$  Hz, 1H), 4.25-4.19 (m, 1H), 3.89 (s, 3H), 3.77 (s, 3H), 3.05 (dd,  $J = 12.8, 2.4$  Hz, 1H), 2.54-2.44 (m, 2H), 2.32 (s, 3H), 2.21-2.14 (m, 1H), 2.12-2.06 (m, 1H).  $^{13}C$  NMR (100 MHz,  $CDCl_3$ )  $\delta$  202.2, 171.2, 170.9, 147.9, 143.4, 136.9, 136.8, 135.8, 135.5, 133.0, 126.9, 126.6, 92.2, 89.1, 72.6, 68.7, 55.5, 53.1, 52.9, 44.1, 39.2, 30.6, 29.9. IR (thin film)  $\nu_{max}$  ( $cm^{-1}$ ) = 1734, 1688, 1437, 1234, 1214, 1182, 1047, 1004, 912, 822, 732, 648. HRMS (ESI) calcd for  $C_{23}H_{23}O_6NaI$   $[M+Na]^+$ : 545.0432. Found: 545.0437.

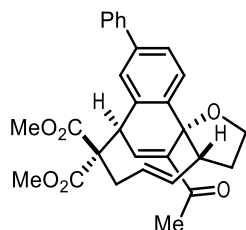

**E-2q**, yellow oil, 65.2 mg, 69% yield,  $E/Z = 6.4/1$ .  $^1H$  NMR (400 MHz,  $CDCl_3$ )  $\delta$  7.62-7.60 (m, 1H), 7.57-7.52 (m, 3H), 7.44-7.40 (m, 2H), 7.35-7.31 (m, 1H), 7.17 (d,  $J = 2.0$  Hz, 1H), 6.81 (d,  $J = 5.2$  Hz, 1H), 5.34-5.28 (m, 1H), 5.20-5.14 (m, 1H), 4.60 (d,  $J = 4.0$  Hz, 1H), 4.44-4.40 (m, 1H), 4.34-4.28 (m, 1H), 3.80 (s, 3H), 3.78 (s, 3H), 3.11 (dd,  $J = 12.8, 2.0$  Hz, 1H), 2.60-2.51 (m, 2H), 2.36 (s, 3H), 2.27-2.21 (m, 1H), 2.15-2.12 (m, 1H).  $^{13}C$  NMR (100 MHz,  $CDCl_3$ )  $\delta$  202.7, 171.6, 171.3, 148.3, 142.6, 141.0, 139.6, 135.6, 134.9, 133.5, 128.9, 127.5, 127.2, 127.2, 127.0, 125.8, 125.1, 89.4, 72.6, 68.9, 55.8, 53.1, 52.9, 44.7, 39.4, 30.8, 30.1. IR (thin film)  $\nu_{max}$  ( $cm^{-1}$ ) = 1737, 1689, 1437, 1236, 1217, 1181, 1041, 1002, 912, 825, 723, 641. HRMS (ESI) calcd for  $C_{29}H_{28}O_6Na$   $[M+Na]^+$ : 495.1884. Found: 495.1816.

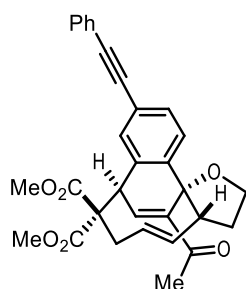

*E*-**2r**, yellow oil, 50.3 mg, 54% yield, *E/Z* = 6.4/1. <sup>1</sup>H NMR (400 MHz, CDCl<sub>3</sub>) δ 7.53-7.48 (m, 4H), 7.36-7.33 (m, 3H), 7.14-7.13 (m, 1H), 6.79 (d, *J* = 5.2 Hz, 1H), 5.32-5.26 (m, 1H), 5.15-5.08 (m, 1H), 4.52 (d, *J* = 5.6 Hz, 1H), 4.41 (t, *J* = 8.0 Hz, 1H), 4.31-4.25 (m, 1H), 3.91 (s, 3H), 3.81 (s, 3H), 3.09 (dd, *J* = 12.8, 2.4 Hz, 1H), 2.58-2.48 (m, 2H), 2.35 (s, 3H), 2.25-2.19 (m, 1H), 2.15-2.11 (m, 1H). <sup>13</sup>C NMR (100 MHz, CDCl<sub>3</sub>) δ 202.4, 171.5, 171.2, 148.0, 143.8, 135.6, 134.7, 133.5, 131.7, 131.1, 130.2, 128.5, 128.5, 127.1, 124.9, 123.3, 121.6, 89.5, 89.3, 89.1, 72.7, 68.9, 55.8, 53.1, 52.9, 44.4, 39.3, 30.8, 30.1. IR (thin film)  $\nu_{\max}$  (cm<sup>-1</sup>) = 1739, 1689, 1437, 1238, 1217, 1171, 1041, 1002, 913, 822, 724, 651. HRMS (ESI) calcd for C<sub>31</sub>H<sub>28</sub>O<sub>6</sub>Na [M+Na]<sup>+</sup>: 519.1886. Found: 519.1854.

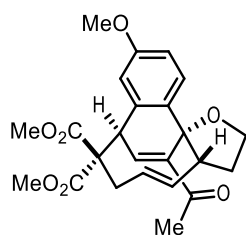

*E*-**2s**, white solid, 63.7 mg, 74% yield, m.p. = 162.9-164.5 °C, *E/Z* = 4.8/1. <sup>1</sup>H NMR (400 MHz, CDCl<sub>3</sub>) δ 7.46-7.43 (m, 1H), 6.91-6.88 (m, 1H), 6.76-6.74 (m, 1H), 6.51-6.50 (m, 1H), 5.29-5.23 (m, 1H), 5.15-5.06 (m, 1H), 4.52 (d, *J* = 5.2 Hz, 1H), 4.37 (t, *J* = 7.6 Hz, 1H), 4.26-4.22 (m, 1H), 3.87 (s, 3H), 3.79 (s, 3H), 3.76 (s, 3H), 3.09-3.06 (m, 1H), 2.56-2.48 (m, 2H), 2.33 (s, 3H), 2.23-2.17 (m, 1H), 2.12-2.08 (m, 1H). <sup>13</sup>C NMR (100 MHz, CDCl<sub>3</sub>) δ 202.8, 171.6, 171.3, 158.2, 148.6, 135.8, 135.8, 135.7, 133.5, 126.6, 125.8, 113.8, 112.5, 89.5, 72.4, 68.7, 55.8, 55.4, 53.1, 52.9, 44.5, 39.3, 30.8, 30.1. IR (thin film)  $\nu_{\max}$  (cm<sup>-1</sup>) = 2953, 1733, 1685, 1611, 1497, 1436, 1237, 1130, 1046, 1003, 913, 880, 817, 732, 685, 649. HRMS (ESI) calcd for C<sub>24</sub>H<sub>26</sub>O<sub>7</sub>Na [M+Na]<sup>+</sup>: 449.1571. Found: 449.1565.

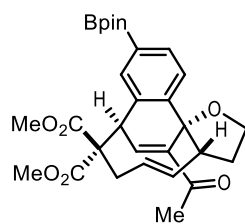

*E*-**2t**, white foam, 71.0 mg, 68% yield, *E/Z* = 8/1.  $^1\text{H}$  NMR (400 MHz,  $\text{CDCl}_3$ )  $\delta$  7.73 (d,  $J$  = 7.6 Hz, 1H), 7.52 (d,  $J$  = 7.6 Hz, 1H), 7.43 (s, 1H), 6.77 (d,  $J$  = 5.2 Hz, 1H), 5.30-5.24 (m, 1H), 5.12-5.05 (m, 1H), 4.56 (d,  $J$  = 5.2 Hz, 1H), 4.41-4.37 (m, 1H), 4.31-4.25 (m, 1H), 3.95 (s, 3H), 3.79 (s, 3H), 3.09-3.06 (m, 1H), 2.56-2.46 (m, 2H), 2.33 (s, 3H), 2.23-2.09 (m, 2H), 1.32 (s, 12H).  $^{13}\text{C}$  NMR (100 MHz,  $\text{CDCl}_3$ )  $\delta$  202.5, 171.3, 171.2, 147.9, 146.4, 135.4, 134.0, 133.61, 133.60, 133.5, 127.0, 123.7, 89.3, 83.7, 72.5, 68.6, 55.5, 52.9, 52.7, 44.3, 39.4, 30.6, 30.0, 25.0, 24.9. IR (thin film)  $\nu_{\text{max}}$  ( $\text{cm}^{-1}$ ) = 2962, 1734, 1685, 1612, 1499, 1439 1231, 1131, 1041, 1002, 912, 881, 814, 733, 686, 642. HRMS (ESI) calcd for  $\text{C}_{29}\text{H}_{35}\text{BO}_8\text{Na}$   $[\text{M}+\text{Na}]^+$ : 545.2425. Found: 545.2436.

### 2.3 Procedure for the cascade dearomative [5 + 4]/[2 + 2] cycloadditions of benzene derived VCPs (using **9a** as an example)

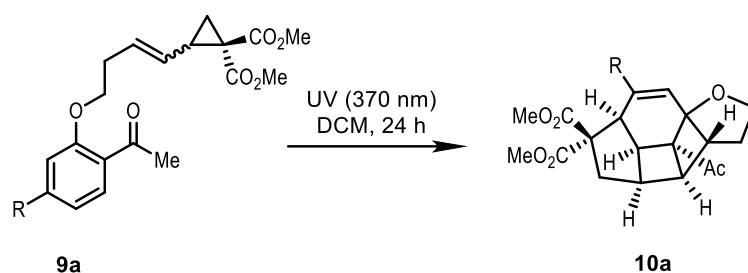

To a flame-dried sealed tube were added benzene derivative **9a** (70.0 mg, 0.2 mmol) and anhydrous DCM (20 mL). The reaction mixture was degassed *via* freeze-pump-thaw for 3 cycles. After the reaction mixture was thoroughly degassed, the vial was sealed and positioned approximately 10 cm from UV LEDs (24 W,  $\lambda_{\text{max}} = 370$  nm). Then the reaction mixture was stirred at room temperature for 24 h (monitored by TLC) under argon atmosphere. Afterwards, the reaction mixture was filtered and concentrated by rotary evaporation. Then, the residue was purified by silica gel column chromatography (petroleum ether/EtOAc = 3/1) to afford the desired product **10a**.

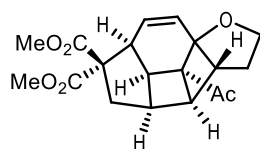

**10a**, yellow oil, 33.2 mg, 48% yield.  $^1\text{H}$  NMR (400 MHz,  $\text{CDCl}_3$ )  $\delta$  6.08 (d,  $J = 10.4$  Hz, 1H), 5.68 (dd,  $J = 10.8, 5.2$  Hz, 1H), 4.00 (t,  $J = 8.8$  Hz, 1H), 3.81-3.73 (m, 7H), 3.47-3.44 (m, 1H), 3.20-3.15 (m, 1H), 2.99-2.85 (m, 2H), 2.67-2.59 (m, 2H), 2.18-2.06 (m, 2H), 1.93 (s, 3H), 1.81-1.76 (m, 1H).  $^{13}\text{C}$  NMR (100 MHz,  $\text{CDCl}_3$ )  $\delta$  207.5, 171.9, 169.5, 132.2, 126.5, 83.7, 69.2, 67.5, 55.1, 53.0, 52.6, 46.6, 41.0, 40.3, 33.7, 31.4, 30.7, 29.7, 25.5. IR (thin film)  $\nu_{\text{max}}$  ( $\text{cm}^{-1}$ ) = 2954, 2923, 2852, 1723, 1694, 1452, 1434, 1355, 1229, 1171, 1107, 1065, 982, 854, 749, 732, 681, 604. HRMS (ESI) calcd for  $\text{C}_{19}\text{H}_{22}\text{O}_6\text{Na}$   $[\text{M}+\text{Na}]^+$ : 369.1309. Found: 369.1302.

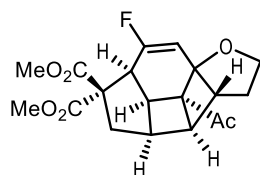

**10b**, yellow solid, 21.9 mg, 30% yield, m.p. = 127.3-127.9 °C. <sup>1</sup>H NMR (400 MHz, CDCl<sub>3</sub>) δ 5.67 (d, *J* = 17.6 Hz, 1H), 3.99-3.95 (m, 1H), 3.76-3.66 (m, 7H), 3.27-3.21 (m, 1H), 3.01-2.99 (m, 1H), 2.96-2.84 (m, 2H), 2.78-2.72 (m, 1H), 2.64-2.63 (m, 1H), 2.26-2.22 (s, 1H), 2.15-2.05 (m, 1H), 1.94 (s, 3H), 1.82-1.76 (m, 1H). <sup>13</sup>C NMR (100 MHz, CDCl<sub>3</sub>) δ 206.6, 171.4, 169.2, 159.0, 156.5, 109.8, 109.6, 85.7, 85.6, 69.4, 66.2, 66.1, 55.0, 53.3, 53.0, 46.6, 46.6, 44.0, 43.8, 41.7, 41.6, 33.20, 33.17, 33.1, 31.30, 31.27, 29.8, 25.7. <sup>19</sup>F NMR (376 MHz, CDCl<sub>3</sub>) δ -99.55 ~ -99.58 (m, 1F). IR (thin film) ν<sub>max</sub> (cm<sup>-1</sup>) = 2989, 2928, 2851, 1720, 1693, 1451, 1434, 1355, 1228, 1170, 1108, 1066, 983, 854, 746, 733, 680, 602. HRMS (ESI) calcd for C<sub>19</sub>H<sub>21</sub>FO<sub>6</sub>Na [M+Na]<sup>+</sup>: 387.1322. Found: 387.1312.

### 3. Transformations of Products

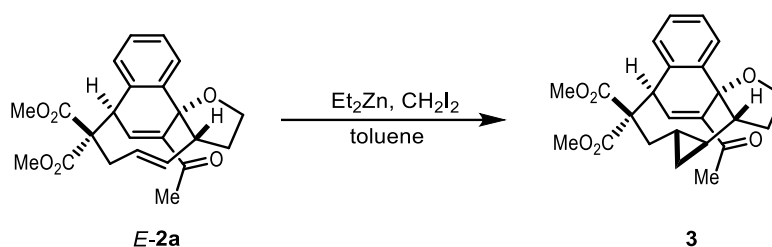

To a solution of *E*-**2a** (78.0 mg, 0.2 mmol) in toluene was added diethylzinc (0.8 mL, 1.6 mmol) and diiodomethane (0.26 mL, 3.2 mmol) under argon atmosphere. The reaction mixture was stirred at room temperature overnight. After completion (monitored by TLC), the reaction was quenched with water. The aqueous layer was extracted with EtOAc (10 mL  $\times$  3). The combined organic layers were washed with brine, dried over Na<sub>2</sub>SO<sub>4</sub>, filtered and concentrated by rotary evaporation and the residue was purified by silica gel column chromatography (petroleum ether/EtOAc = 6/1) to afford the desired product **3**.

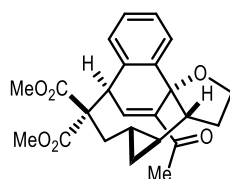

**3**, colorless oil, 56.0 mg, 70% yield. <sup>1</sup>H NMR (400 MHz, CDCl<sub>3</sub>)  $\delta$  7.46 (d,  $J$  = 8.0 Hz, 1H), 7.28 (t,  $J$  = 7.6 Hz, 1H), 7.14 (t,  $J$  = 7.6 Hz, 1H), 7.02 (d,  $J$  = 8.0 Hz, 1H), 6.83 (d,  $J$  = 5.6 Hz, 1H), 4.79 (d,  $J$  = 5.6 Hz, 1H), 4.31 (t,  $J$  = 8.4 Hz, 1H), 4.23-4.17 (m, 1H), 3.82 (s, 3H), 3.77 (s, 3H), 2.71 (d,  $J$  = 14.0 Hz, 1H), 2.51-2.42 (m, 1H), 2.38 (s, 3H), 2.10-2.04 (m, 1H), 1.46-1.39 (m, 1H), 1.01-0.95 (m, 1H), 0.34-0.20 (m, 4H). <sup>13</sup>C NMR (100 MHz, CDCl<sub>3</sub>)  $\delta$  203.8, 171.8, 171.5, 148.4, 146.8, 133.1, 132.9, 127.7, 126.7, 126.3, 124.6, 85.6, 71.3, 63.3, 56.8, 52.8, 51.7, 43.7, 37.4, 31.6, 30.9, 24.2, 11.3, 8.8. IR (thin film)  $\nu_{\max}$  (cm<sup>-1</sup>) = 2946, 2845, 1729, 1695, 1435, 1356, 1235, 1209, 1149, 1097, 1071, 1042, 1001, 942, 894, 790, 762, 733, 679, 530, 478, 428. HRMS (ESI) calcd for C<sub>24</sub>H<sub>26</sub>O<sub>6</sub>Na [M+Na]<sup>+</sup>: 433.1622. Found: 433.1628.



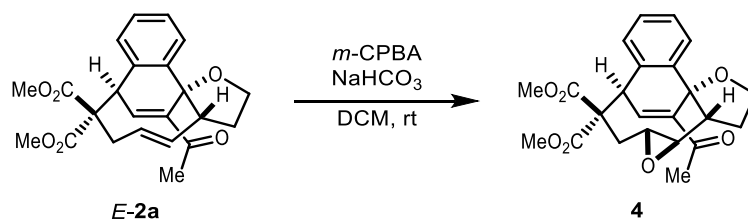

To a solution of *E*-**2a** (78.0 mg, 0.2 mmol) in DCM was added sodium bicarbonate (34.0 mg, 0.4 mmol) and *m*-chloroperbenzoic acid (52.0 mg, 0.3 mmol). The reaction mixture was stirred at room temperature overnight. After the completion of the reaction (monitored by TLC), the suspension was filtered and washed with dichloromethane. Then, the filtrate was concentrated by rotary evaporation and the residue was purified by silica gel column chromatography (petroleum ether /EtOAc = 3/1) to afford the desired product **4**.

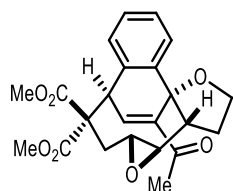

**4**, viscous solid, 61.1 mg, 96% yield. <sup>1</sup>H NMR (400 MHz, CDCl<sub>3</sub>) δ 7.50 (d, *J* = 8.0 Hz, 1H), 7.32 (t, *J* = 7.6 Hz, 1H), 7.19 (t, *J* = 7.6 Hz, 1H), 7.02 (d, *J* = 8.0 Hz, 1H), 6.75 (d, *J* = 5.6 Hz, 1H), 4.82 (d, *J* = 5.6 Hz, 1H), 4.38 (t, *J* = 8.4 Hz, 1H), 4.31-4.25 (m, 1H), 3.84 (s, 3H), 3.80 (s, 3H), 2.93 (d, *J* = 13.2 Hz, 1H), 2.69-2.56 (m, 2H), 2.50-2.47 (m, 1H), 2.37 (s, 3H), 2.28-2.21 (m, 1H), 1.81-1.74 (m, 1H), 1.33-1.25 (m, 1H). <sup>13</sup>C NMR (100 MHz, CDCl<sub>3</sub>) δ 203.5, 170.73, 170.71, 148.1, 145.5, 132.6, 132.0, 128.2, 127.0, 126.8, 124.8, 84.4, 72.3, 61.8, 61.4, 54.6, 53.2, 52.7, 51.9, 43.8, 35.2, 31.0, 29.8. IR (thin film) ν<sub>max</sub> (cm<sup>-1</sup>) = 2959, 2917, 1731, 1693, 1435, 1357, 1258, 1212, 1137, 1086, 1068, 1041, 970, 948, 902, 888, 840, 823, 791, 777, 740. HRMS (ESI) calcd for C<sub>23</sub>H<sub>24</sub>O<sub>7</sub>Na [M+Na]<sup>+</sup>: 435.1414. Found: 435.1411.

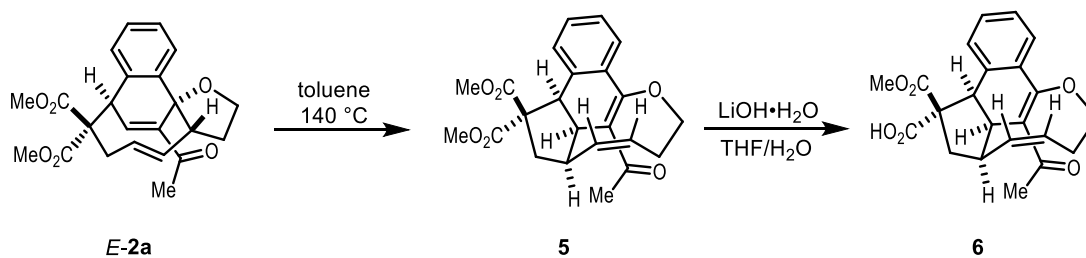

To a solution of *E*-**2a** (79.0 mg, 0.2 mmol) in toluene was heated at 140 °C for 1.5 h under argon. After the completion of the reaction (monitored by TLC), the suspension was filtered and washed with dichloromethane. Then the filtrate was concentrated by rotary evaporation and the residue was purified by silica gel column chromatography (petroleum ether/EtOAc = 4/1) to afford the desired product **5**.

To a solution of **5** (79.2 mg, 0.2 mmol) in THF/H<sub>2</sub>O (v/v = 1/1) was added LiOH·H<sub>2</sub>O (34.0 mg, 0.8 mmol). The reaction mixture was stirred at room temperature overnight. After the completion of the reaction (monitored by TLC), the resulted solution was acidified with HCl (2 N) until pH < 2. The aqueous layer was extracted with EtOAc (10 mL × 3). The combined organic layers were washed with brine, dried over Na<sub>2</sub>SO<sub>4</sub>, filtered and concentrated by rotary evaporation and the residue was purified by silica gel column chromatography (petroleum ether/EtOAc = 1/5) to afford the desired product **6**.

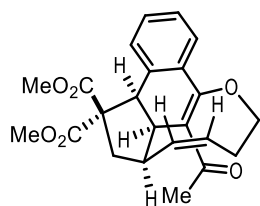

**5**, brown oil, 70.7 mg, 89% yield. <sup>1</sup>H NMR (400 MHz, CDCl<sub>3</sub>) δ 7.55-7.53 (m, 1H), 7.15-7.13 (m, 2H), 7.01-6.98 (m, 1H), 5.58 (dd, *J* = 11.6, 6.0 Hz, 1H), 5.10-5.03 (m, 1H), 4.75 (d, *J* = 8.8 Hz, 1H), 4.71-4.67 (m, 1H), 4.58-4.51 (m, 1H), 3.80 (s, 3H), 3.67 (s, 3H), 3.39-3.36 (m, 1H), 3.08-3.03 (m, 1H), 2.60-2.57 (m, 1H), 2.42 (s, 3H), 2.37-2.31 (m, 1H), 2.16-2.04 (m, 2H). <sup>13</sup>C NMR (100 MHz, CDCl<sub>3</sub>) δ 199.8, 173.2, 172.5, 162.5, 136.9, 136.1, 134.9, 129.4, 129.3, 127.7, 126.9, 122.2, 76.8, 69.2, 60.4, 53.2, 52.4, 48.7, 47.7, 40.1, 29.5, 29.1, 14.3. IR (thin film)  $\nu_{\max}$  (cm<sup>-1</sup>) = 1730, 1642, 1610, 1564, 1434, 1389, 1364, 1295, 1246, 1205, 1163, 1114, 1067, 1023, 911, 784, 729, 646. HRMS (ESI) calcd for C<sub>23</sub>H<sub>24</sub>O<sub>6</sub>Na [M+Na]<sup>+</sup>: 419.1465. Found: 419.1465.

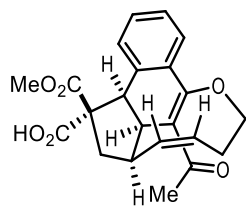

**6**, white solid, 46.6 mg, 61% yield, m.p. = 189.0-194.5 °C. <sup>1</sup>H NMR (400 MHz, CDCl<sub>3</sub>) δ 7.52-7.50 (m, 1H), 7.11-7.09 (m, 2H), 7.01-6.99 (m, 1H), 6.79 (br, 1H), 5.54 (dd, *J* = 11.6, 6.0 Hz, 1H), 5.08-5.00 (m, 1H), 4.72-4.68 (m, 2H), 4.57-4.51 (m, 1H), 3.64 (s, 3H), 3.47-3.44 (m, 1H), 3.07-3.02 (m, 1H), 2.60-2.57 (m, 1H), 2.50-2.46 (m, 1H), 2.41 (s, 3H), 2.13-1.99 (m, 2H). <sup>13</sup>C NMR (100 MHz, CDCl<sub>3</sub>) δ 200.2, 177.6, 173.7, 163.2, 137.5, 135.9, 135.4, 129.3, 129.0, 127.7, 126.6, 123.5, 122.1, 69.8, 46.5, 40.4, 52.3, 49.0, 47.6, 29.7, 29.4, 28.9. IR (thin film)  $\nu_{\max}$  (cm<sup>-1</sup>) = 1726, 1593, 1559, 1392, 1299, 1249, 1165, 910, 780, 723. HRMS (ESI) calcd for C<sub>22</sub>H<sub>22</sub>O<sub>6</sub>Na [M+Na]<sup>+</sup>: 405.1309. Found: 405.1310.

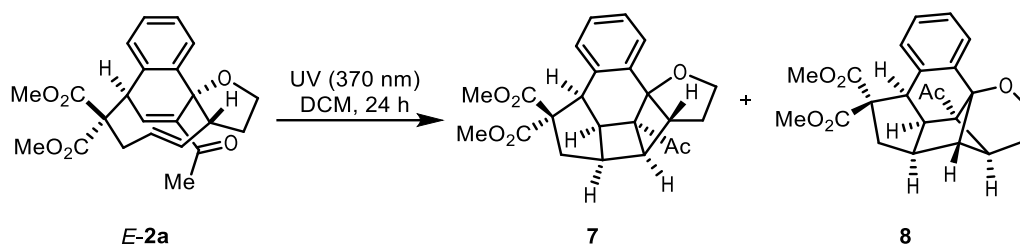

To a flame-dried sealed tube were added *E-2a* (79.0 mg, 0.2 mmol) and anhydrous DCM (2.0 mL). The reaction mixture was degassed *via* freeze-pump-thaw for 3 cycles. After the reaction mixture was thoroughly degassed, the vial was sealed and positioned approximately 10 cm from UV LEDs (24 W,  $\lambda_{\max}$  = 370 nm). Then the reaction mixture was stirred at room temperature for the indicated time (monitored by TLC) under argon atmosphere. Afterwards, the reaction mixture was concentrated by rotary evaporation. Then the residue was purified by silica gel column chromatography (petroleum ether/EtOAc = 4/1) to afford the desired products **7** and **8**.

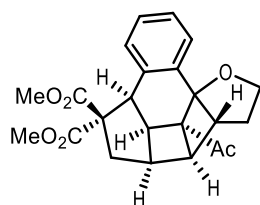

**7**, white solid, 33.3 mg, 42% yield, m.p. = 171.6-172.5 °C. <sup>1</sup>H NMR (400 MHz, CDCl<sub>3</sub>) δ 7.61-7.60 (m, 1H), 7.28-7.26 (m, 1H), 7.22-7.20 (m, 1H), 7.12-7.11 (m, 1H), 4.42 (d, *J* = 6.4 Hz, 1H), 4.24 (t, *J* = 5.6 Hz, 1H), 3.96-3.92 (m, 1H), 3.78 (s, 3H), 3.56 (s, 3H), 3.35-3.32 (m, 1H), 3.12-3.07 (m, 2H), 2.80-2.77 (m, 1H), 2.73-2.72 (m, 1H), 2.26-2.15

(m, 2H), 1.86 (dd,  $J = 8.4, 3.6$  Hz, 1H), 1.72 (s, 3H).  $^{13}\text{C}$  NMR (100 MHz,  $\text{CDCl}_3$ )  $\delta$  207.2, 172.9, 169.5, 136.6, 133.0, 130.0, 127.7, 127.2, 125.2, 85.5, 71.2, 69.2, 55.4, 53.2, 52.3, 46.0, 45.5, 41.5, 35.2, 34.4, 32.2, 31.8, 25.5. IR (thin film)  $\nu_{\text{max}}$  ( $\text{cm}^{-1}$ ) = 2989, 1728, 1592, 1558, 1391, 1298, 1247, 1166, 911, 781, 720. HRMS (ESI) calcd for  $\text{C}_{23}\text{H}_{24}\text{O}_6\text{Na}$   $[\text{M}+\text{Na}]^+$ : 419.1465. Found: 419.1464.

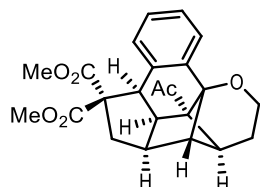

**8**, white solid, 32.5 mg, 41% yield, m.p. = 163.3-164.4 °C.  $^1\text{H}$  NMR (400 MHz,  $\text{CDCl}_3$ )  $\delta$  7.65-7.64 (m, 1H), 7.27-7.25 (m, 1H), 7.17-7.14 (m, 1H), 6.98-6.96 (m, 1H), 4.20-4.15 (m, 1H), 4.06 (d,  $J = 4.0$  Hz, 1H), 3.85-3.81 (m, 1H), 3.77 (s, 3H), 3.61 (s, 3H), 3.25 (dd,  $J = 6.4, 4.0$  Hz, 1H), 2.95 (s, 1H), 2.57-2.52 (m, 2H), 2.19-2.14 (m, 2H), 2.00-1.95 (m, 1H), 1.77 (dd,  $J = 9.2, 5.6$  Hz, 1H), 1.53 (s, 3H).  $^{13}\text{C}$  NMR (100 MHz,  $\text{CDCl}_3$ )  $\delta$  209.7, 171.3, 169.1, 138.9, 133.9, 127.5, 127.4, 127.1, 126.4, 86.7, 70.9, 63.1, 61.3, 53.2, 52.8, 52.5, 51.9, 48.2, 46.6, 41.1, 30.5, 29.5, 24.2. IR (thin film)  $\nu_{\text{max}}$  ( $\text{cm}^{-1}$ ) = 2989, 1727, 1590, 1558, 1391, 1298, 1248, 1167, 912, 782, 721. HRMS (ESI) calcd for  $\text{C}_{23}\text{H}_{24}\text{O}_6\text{Na}$   $[\text{M}+\text{Na}]^+$ : 419.1465. Found: 419.1464.

## 4. Mechanistic Studies

### 4.1 Control experiment with triplet quencher

2,5-Dimethylhexa-2,4-diene is known as a triplet quencher.<sup>[3]</sup> The target dearomative [5 + 4] cycloaddition reaction of **1a** to *E*-**2a** was significantly inhibited in the presence of 2,5-dimethylhexa-2,4-diene (1 equiv) and the <sup>1</sup>H NMR yield of *E*-**2a** was reduced to 13%. This result suggested that a triplet diradical intermediate might be involved in the reaction.

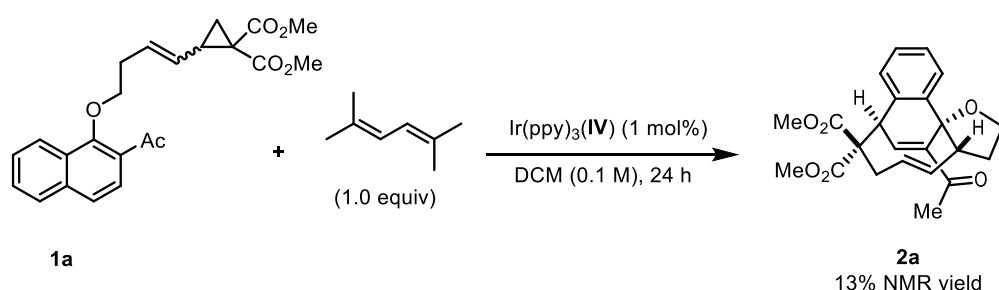

### 4.2 Transformation of *E*-**2a** under photosensitizer **V**

Compound *E*-**2a** (0.2 mmol) were subjected to following conditions: photosensitizer **V** (1 mol%) in CH<sub>2</sub>Cl<sub>2</sub> (2.0 mL) in the presence of 24 W blue LEDs at room temperature under argon. At each time interval, 0.2 mL of the reaction mixture was taken out and quenched. The ratios of *E*-**2a**, *Z*-**2a**, and combined **7** and **8** in each crude mixture were determined by <sup>1</sup>H NMR analysis (Supplementary Table 1 and Supplementary Figure 1).

**Supplementary Table 1.** Transformation of *E*-**2a** under photosensitizer **V**.

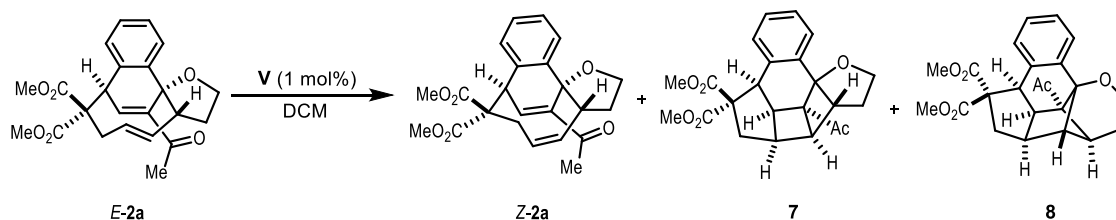

|            |   |   |   |   |    |    |
|------------|---|---|---|---|----|----|
| time (min) | 0 | 2 | 4 | 6 | 12 | 22 |
|------------|---|---|---|---|----|----|

|                                |     |    |    |    |    |    |
|--------------------------------|-----|----|----|----|----|----|
| <i>E-2a</i>                    | 100 | 46 | 38 | 30 | 17 | 0  |
| Combined <b>7</b> and <b>8</b> | 0   | 28 | 28 | 28 | 30 | 41 |
| <i>Z-2a</i>                    | 0   | 26 | 34 | 42 | 53 | 59 |

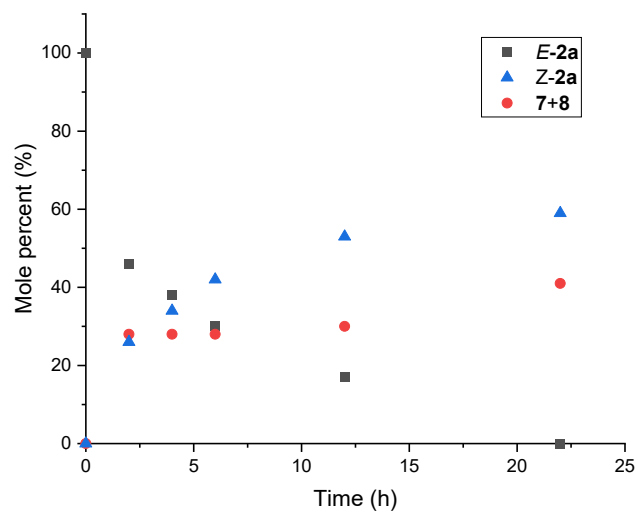

**Supplementary Figure 1.** Time course of mole percent of *E-2a*, *Z-2a*, **7** and **8**.

### 4.3 DFT calculations

#### *Computational methods*

All the calculations in this study were performed with Gaussian16.<sup>[4]</sup> DFT studies were carried out with the (U)B3LYP functional.<sup>[5-7]</sup> The Grimme dispersion correction scheme D3 with Becke–Johnson damping<sup>[8]</sup> was added to consider weak dispersion interaction.<sup>[9]</sup> The def2-SVP basis sets<sup>[10-11]</sup> of Weigend and Ahlrichs were employed for all atoms. Optimizations were conducted without any constraint in dichloromethane (SMD model,<sup>[12]</sup>  $\epsilon = 8.93$ ). Frequency analyses at the same computational level were carried out to confirm that each structure is a local minimum (no imaginary frequency) or a transition state (only one imaginary frequency). Single-point calculations were performed at the (U)M062X-D3/def2-TZVPP (SMD, DCM) level of theory in order to obtain more accurate estimation of the energies. The searching for minimal energy crossing points was conducted using a modified version of Harvey's code<sup>[13]</sup> (sobMECP<sup>[14]</sup>) interfaced with Gaussian16.

#### *Cartesian coordinates and energies for all the optimized structures*

The coordinates of all the optimized structures are included in the Source Data file of this manuscript.

##### **1a**

```
Opt @ B3LYP-D3(BJ)/def2-SVP in dichloromethane (SMD model)
SCF Done: E(RB3LYP) = -1341.38963154 a.u.
Sum of electronic and thermal Free Energies = -1341.020292 a.u.
SP @ M062X-D3/def2-TZVPP in dichloromethane (SMD model)
SCF Done: E(RM062X) = -1342.23592769 a.u.
```

##### **1a-T<sub>1</sub>**

```
Opt @ B3LYP-D3(BJ)/def2-SVP in dichloromethane (SMD model)
SCF Done: E(UB3LYP) = -1341.30216962 a.u.
Sum of electronic and thermal Free Energies = -1340.937981 a.u.
SP @ M062X-D3/def2-TZVPP in dichloromethane (SMD model)
```

SCF Done: E(UM062X) = -1342.13569702 a.u.

### **TS1-T<sub>1</sub>**

Opt @ B3LYP-D3(BJ)/def2-SVP in dichloromethane (SMD model)

SCF Done: E(UB3LYP) = -1341.29748593 a.u.

Sum of electronic and thermal Free Energies = -1340.931687 a.u.

SP @ M062X-D3/def2-TZVPP in dichloromethane (SMD model)

SCF Done: E(UM062X) = -1342.12794740 a.u.

### **INT1-T<sub>1</sub>**

Opt @ B3LYP-D3(BJ)/def2-SVP in dichloromethane (SMD model)

SCF Done: E(UB3LYP) = -1341.31478088 a.u.

Sum of electronic and thermal Free Energies = -1340.946167 a.u.

SP @ M062X-D3/def2-TZVPP in dichloromethane (SMD model)

SCF Done: E(UM062X) = -1342.15554547 a.u.

### **TS2-Z-T<sub>1</sub>**

Opt @ B3LYP-D3(BJ)/def2-SVP in dichloromethane (SMD model)

SCF Done: E(UB3LYP) = -1341.30558950 a.u.

Sum of electronic and thermal Free Energies = -1340.940485 a.u.

SP @ M062X-D3/def2-TZVPP in dichloromethane (SMD model)

SCF Done: E(UM062X) = -1342.14512613 a.u.

### **TS2-E-T<sub>1</sub>**

Opt @ B3LYP-D3(BJ)/def2-SVP in dichloromethane (SMD model)

SCF Done: E(UB3LYP) = -1341.31202575 a.u.

Sum of electronic and thermal Free Energies = -1340.944144 a.u.

SP @ M062X-D3/def2-TZVPP in dichloromethane (SMD model)

SCF Done: E(UM062X) = -1342.14936041 a.u.

### **INT2-Z-T<sub>1</sub>**

Opt @ B3LYP-D3(BJ)/def2-SVP in dichloromethane (SMD model)

SCF Done: E(UB3LYP) = -1341.32619376 a.u.

Sum of electronic and thermal Free Energies = -1340.959135 a.u.

SP @ M062X-D3/def2-TZVPP in dichloromethane (SMD model)

SCF Done: E(UM062X) = -1342.16185361 a.u.



**INT2-E-T<sub>1</sub>**

Opt @ B3LYP-D3(BJ)/def2-SVP in dichloromethane (SMD model)  
SCF Done: E(UB3LYP) = -1341.32954461 a.u.  
Sum of electronic and thermal Free Energies = -1340.961183 a.u.  
SP @ M062X-D3/def2-TZVPP in dichloromethane (SMD model)  
SCF Done: E(UM062X) = -1342.16333040 a.u.

**MECP1**

Opt @ B3LYP-D3(BJ)/def2-SVP in dichloromethane (SMD model)  
For open-shell singlet state  
SCF Done: E(UB3LYP) = -1341.3294481500 a.u.  
For triplet state  
SCF Done: E(UB3LYP) = -1341.3294981100 a.u.

**MECP2**

Opt @ B3LYP-D3(BJ)/def2-SVP in dichloromethane (SMD model)  
For open-shell singlet state  
SCF Done: E(UB3LYP) = -1341.32568463 a.u.  
For triplet state  
SCF Done: E(UB3LYP) = -1341.32572861 a.u.

**INT2-Z-OSS**

Opt @ B3LYP-D3(BJ)/def2-SVP in dichloromethane (SMD model)  
SCF Done: E(UB3LYP) = -1341.32600178 a.u.  
Sum of electronic and thermal Free Energies = -1340.958052 a.u.  
SP @ M062X-D3/def2-TZVPP in dichloromethane (SMD model)  
SCF Done: E(UM062X) = -1342.16151159 a.u.

**INT2-E-OSS**

Opt @ B3LYP-D3(BJ)/def2-SVP in dichloromethane (SMD model)  
SCF Done: E(UB3LYP) = -1341.32967525 a.u.  
Sum of electronic and thermal Free Energies = -1340.960444 a.u.  
SP @ M062X-D3/def2-TZVPP in dichloromethane (SMD model)  
SCF Done: E(UM062X) = -1342.16407885 a.u.

**TS3-Z-OSS**

Opt @ B3LYP-D3(BJ)/def2-SVP in dichloromethane (SMD model)  
SCF Done: E(UB3LYP) = -1341.32472239 a.u.  
Sum of electronic and thermal Free Energies = -1340.954182 a.u.  
SP @ M062X-D3/def2-TZVPP in dichloromethane (SMD model)  
SCF Done: E(UM062X) = -1342.15891634 a.u.

**TS3-E-OSS**

Opt @ B3LYP-D3(BJ)/def2-SVP in dichloromethane (SMD model)  
SCF Done: E(UB3LYP) = -1341.32963312 a.u.  
Sum of electronic and thermal Free Energies = -1340.958276 a.u.  
SP @ M062X-D3/def2-TZVPP in dichloromethane (SMD model)  
SCF Done: E(UM062X) = -1342.16450125 a.u.

**Z-2a**

Opt @ B3LYP-D3(BJ)/def2-SVP in dichloromethane (SMD model)  
SCF Done: E(RB3LYP) = -1341.38836858 a.u.  
Sum of electronic and thermal Free Energies = -1341.011828 a.u.  
SP @ M062X-D3/def2-TZVPP in dichloromethane (SMD model)  
SCF Done: E(RM062X) = -1342.23449745 a.u.

**E-2a**

Opt @ B3LYP-D3(BJ)/def2-SVP in dichloromethane (SMD model)  
SCF Done: E(RB3LYP) = -1341.37383766 a.u.  
Sum of electronic and thermal Free Energies = -1340.998230 a.u.  
SP @ M062X-D3/def2-TZVPP in dichloromethane (SMD model)  
SCF Done: E(RM062X) = -1342.22170537 a.u.

## 5. Data of X-Ray Crystallographic Analyses

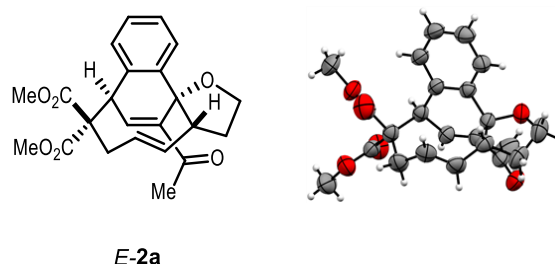

**Supplementary Figure 2.** X-Ray crystal structure of *E-2a* (CCDC 2306009) (The crystal was obtained by slow evaporation of its solution of DCM and PE).

**Supplementary Table 2.** Crystal data and structure refinement for mo\_d8v21450\_0m.

|                                 |                                                |                   |
|---------------------------------|------------------------------------------------|-------------------|
| Identification code             | mo_d8v21450_0m                                 |                   |
| Empirical formula               | C <sub>23</sub> H <sub>24</sub> O <sub>6</sub> |                   |
| Formula weight                  | 396.42                                         |                   |
| Temperature                     | 293(2) K                                       |                   |
| Wavelength                      | 0.71073 Å                                      |                   |
| Crystal system                  | Monoclinic                                     |                   |
| Space group                     | C 2/c                                          |                   |
| Unit cell dimensions            | a = 21.3487(8) Å                               | a = 90°           |
|                                 | b = 12.0164(4) Å                               | b = 109.1310(10)° |
|                                 | c = 16.6320(6) Å                               | g = 90°           |
| Volume                          | 4031.0(3) Å <sup>3</sup>                       |                   |
| Z                               | 8                                              |                   |
| Density (calculated)            | 1.306 Mg/m <sup>3</sup>                        |                   |
| Absorption coefficient          | 0.094 mm <sup>-1</sup>                         |                   |
| F(000)                          | 1680                                           |                   |
| Crystal size                    | 0.160 x 0.140 x 0.100 mm <sup>3</sup>          |                   |
| Theta range for data collection | 2.714 to 25.999°                               |                   |
| Index ranges                    | -23 ≤ h ≤ 26, -14 ≤ k ≤ 14, -20 ≤ l ≤ 20       |                   |
| Reflections collected           | 29785                                          |                   |
| Independent reflections         | 3944 [R(int) = 0.0490]                         |                   |
| Completeness to theta = 25.242° | 99.4 %                                         |                   |
| Absorption correction           | Semi-empirical from equivalents                |                   |
| Max. and min. transmission      | 0.7456 and 0.5501                              |                   |

|                                   |                                             |
|-----------------------------------|---------------------------------------------|
| Refinement method                 | Full-matrix least-squares on F <sup>2</sup> |
| Data / restraints / parameters    | 3944 / 0 / 266                              |
| Goodness-of-fit on F <sup>2</sup> | 1.079                                       |
| Final R indices [I>2sigma(I)]     | R1 = 0.0706, wR2 = 0.2074                   |
| R indices (all data)              | R1 = 0.0871, wR2 = 0.2258                   |
| Extinction coefficient            | 0.0045(15)                                  |
| Largest diff. peak and hole       | 1.342 and -0.280 e.Å <sup>-3</sup>          |

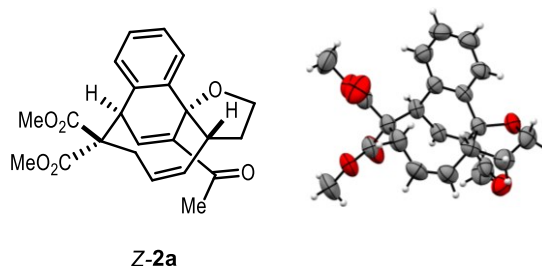

**Supplementary Figure 3.** X-Ray crystal structure of **Z-2a** (CCDC 2306010) (The crystal was obtained by slow evaporation of its solution of DCM and PE).

**Supplementary Table 3.** Crystal data and structure refinement for d8v21441.

|                                   |                                                |                |
|-----------------------------------|------------------------------------------------|----------------|
| Identification code               | d8v21441                                       |                |
| Empirical formula                 | C <sub>23</sub> H <sub>24</sub> O <sub>6</sub> |                |
| Formula weight                    | 396.42                                         |                |
| Temperature                       | 293(2) K                                       |                |
| Wavelength                        | 0.71073 Å                                      |                |
| Crystal system                    | Monoclinic                                     |                |
| Space group                       | P 21/c                                         |                |
| Unit cell dimensions              | a = 10.4581(10) Å                              | a = 90°        |
|                                   | b = 21.448(2) Å                                | b = 97.906(3)° |
|                                   | c = 8.9823(10) Å                               | g = 90°        |
| Volume                            | 1995.6(4) Å <sup>3</sup>                       |                |
| Z                                 | 4                                              |                |
| Density (calculated)              | 1.319 Mg/m <sup>3</sup>                        |                |
| Absorption coefficient            | 0.095 mm <sup>-1</sup>                         |                |
| F(000)                            | 840                                            |                |
| Crystal size                      | 0.110 x 0.100 x 0.050 mm <sup>3</sup>          |                |
| Theta range for data collection   | 2.734 to 25.500°                               |                |
| Index ranges                      | -12 ≤ h ≤ 12, -25 ≤ k ≤ 25, -10 ≤ l ≤ 8        |                |
| Reflections collected             | 15680                                          |                |
| Independent reflections           | 3707 [R(int) = 0.0628]                         |                |
| Completeness to theta = 25.242°   | 99.8 %                                         |                |
| Absorption correction             | Semi-empirical from equivalents                |                |
| Max. and min. transmission        | 0.7456 and 0.5202                              |                |
| Refinement method                 | Full-matrix least-squares on F <sup>2</sup>    |                |
| Data / restraints / parameters    | 3707 / 0 / 266                                 |                |
| Goodness-of-fit on F <sup>2</sup> | 1.058                                          |                |
| Final R indices [I > 2σ(I)]       | R1 = 0.0579, wR2 = 0.1305                      |                |

R indices (all data)

$R_1 = 0.1062$ ,  $wR_2 = 0.1545$

Extinction coefficient

0.013(3)

Largest diff. peak and hole

0.179 and -0.118 e.Å<sup>-3</sup>

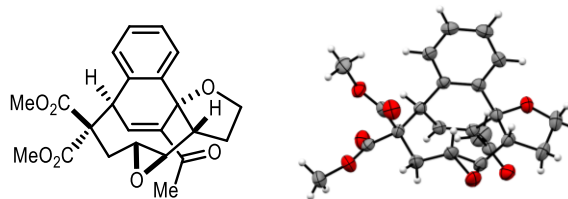

4

**Supplementary Figure 4.** X-Ray crystal structure of **4** (CCDC 2306011) (The crystal was obtained by slow evaporation of the solution of DCM and PE).

**Supplementary Table 4.** Crystal data and structure refinement for mo\_d8v21712\_0m.

|                                   |                                                |          |
|-----------------------------------|------------------------------------------------|----------|
| Identification code               | mo_d8v21712_0m                                 |          |
| Empirical formula                 | C <sub>23</sub> H <sub>24</sub> O <sub>7</sub> |          |
| Formula weight                    | 412.42                                         |          |
| Temperature                       | 213(2) K                                       |          |
| Wavelength                        | 0.71073 Å                                      |          |
| Crystal system                    | Trigonal                                       |          |
| Space group                       | P 32 2 1                                       |          |
| Unit cell dimensions              | a = 12.1993(4) Å                               | a = 90°  |
|                                   | b = 12.1993(4) Å                               | b = 90°  |
|                                   | c = 23.4620(8) Å                               | g = 120° |
| Volume                            | 3023.9(2) Å <sup>3</sup>                       |          |
| Z                                 | 6                                              |          |
| Density (calculated)              | 1.359 Mg/m <sup>3</sup>                        |          |
| Absorption coefficient            | 0.101 mm <sup>-1</sup>                         |          |
| F(000)                            | 1308                                           |          |
| Crystal size                      | 0.170 x 0.150 x 0.120 mm <sup>3</sup>          |          |
| Theta range for data collection   | 2.114 to 25.997°.                              |          |
| Index ranges                      | -15 ≤ h ≤ 13, -13 ≤ k ≤ 15, -28 ≤ l ≤ 28       |          |
| Reflections collected             | 26834                                          |          |
| Independent reflections           | 3950 [R(int) = 0.0333]                         |          |
| Completeness to theta = 25.242°   | 99.5 %                                         |          |
| Absorption correction             | Semi-empirical from equivalents                |          |
| Max. and min. transmission        | 0.7456 and 0.6556                              |          |
| Refinement method                 | Full-matrix least-squares on F <sup>2</sup>    |          |
| Data / restraints / parameters    | 3950 / 0 / 275                                 |          |
| Goodness-of-fit on F <sup>2</sup> | 1.063                                          |          |

|                                      |                                       |
|--------------------------------------|---------------------------------------|
| Final R indices [ $I > 2\sigma(I)$ ] | R1 = 0.0321, wR2 = 0.0799             |
| R indices (all data)                 | R1 = 0.0358, wR2 = 0.0831             |
| Absolute structure parameter         | 0.2(3)                                |
| Extinction coefficient               | 0.014(2)                              |
| Largest diff. peak and hole          | 0.171 and -0.160 e. $\text{\AA}^{-3}$ |



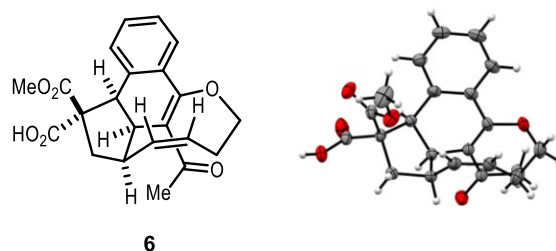

**Supplementary Figure 5.** X-Ray crystal structure of **6** (CCDC 2306012) (The crystal was obtained by slow evaporation of the solution of DCM and PE).

**Supplementary Table 5.** Crystal data and structure refinement for mj22448\_0m.

|                                   |                                                                |                  |
|-----------------------------------|----------------------------------------------------------------|------------------|
| Identification code               | mj22448_0m                                                     |                  |
| Empirical formula                 | C <sub>23</sub> H <sub>24</sub> Cl <sub>2</sub> O <sub>6</sub> |                  |
| Formula weight                    | 467.32                                                         |                  |
| Temperature                       | 222.00 K                                                       |                  |
| Wavelength                        | 1.34139 Å                                                      |                  |
| Crystal system                    | Monoclinic                                                     |                  |
| Space group                       | C 1 2/c 1                                                      |                  |
| Unit cell dimensions              | a = 16.0500(2) Å                                               | a = 90°          |
|                                   | b = 12.2364(2) Å                                               | b = 94.7710(10)° |
|                                   | c = 22.2958(3) Å                                               | g = 90°          |
| Volume                            | 4363.59(11) Å <sup>3</sup>                                     |                  |
| Z                                 | 8                                                              |                  |
| Density (calculated)              | 1.423 Mg/m <sup>3</sup>                                        |                  |
| Absorption coefficient            | 1.982 mm <sup>-1</sup>                                         |                  |
| F(000)                            | 1952                                                           |                  |
| Crystal size                      | 0.07 x 0.07 x 0.05 mm <sup>3</sup>                             |                  |
| Theta range for data collection   | 3.957 to 54.955°.                                              |                  |
| Index ranges                      | -19<=h<=19, -14<=k<=14, -27<=l<=27                             |                  |
| Reflections collected             | 34975                                                          |                  |
| Independent reflections           | 4159 [R(int) = 0.0435]                                         |                  |
| Completeness to theta = 53.594°   | 99.8 %                                                         |                  |
| Absorption correction             | Semi-empirical from equivalents                                |                  |
| Max. and min. transmission        | 0.7508 and 0.5805                                              |                  |
| Refinement method                 | Full-matrix least-squares on F <sup>2</sup>                    |                  |
| Data / restraints / parameters    | 4159 / 0 / 283                                                 |                  |
| Goodness-of-fit on F <sup>2</sup> | 1.062                                                          |                  |
| Final R indices [I>2sigma(I)]     | R1 = 0.0735, wR2 = 0.2007                                      |                  |

R indices (all data)

R1 = 0.0849, wR2 = 0.2114

Extinction coefficient

n/a

Largest diff. peak and hole

1.688 and -1.268 e.Å<sup>-3</sup>

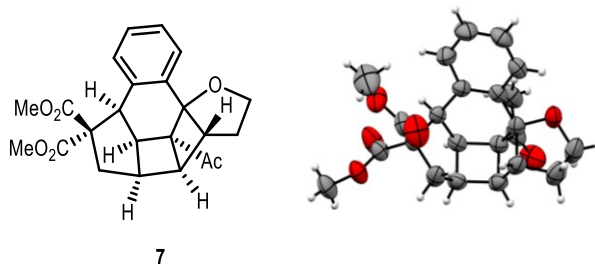

**Supplementary Figure 6.** X-Ray crystal structure of **7** (CCDC 2306013) (The crystal was obtained by slow evaporation of its solution of DCM and PE).

**Supplementary Table 6.** Crystal data and structure refinement for mo\_d8v20517\_0m.

|                                   |                                                |                  |
|-----------------------------------|------------------------------------------------|------------------|
| Identification code               | mo_d8v20517_0m                                 |                  |
| Empirical formula                 | C <sub>23</sub> H <sub>24</sub> O <sub>6</sub> |                  |
| Formula weight                    | 396.42                                         |                  |
| Temperature                       | 293(2) K                                       |                  |
| Wavelength                        | 0.71073 Å                                      |                  |
| Crystal system                    | Monoclinic                                     |                  |
| Space group                       | P 2 <sub>1</sub> /n                            |                  |
| Unit cell dimensions              | a = 7.6087(2) Å                                | a = 90°          |
|                                   | b = 24.2039(9) Å                               | b = 96.5780(10)° |
|                                   | c = 10.9288(4) Å                               | g = 90°          |
| Volume                            | 1999.40(12) Å <sup>3</sup>                     |                  |
| Z                                 | 4                                              |                  |
| Density (calculated)              | 1.317 Mg/m <sup>3</sup>                        |                  |
| Absorption coefficient            | 0.095 mm <sup>-1</sup>                         |                  |
| F(000)                            | 840                                            |                  |
| Crystal size                      | 0.150 x 0.120 x 0.070 mm <sup>3</sup>          |                  |
| Theta range for data collection   | 2.520 to 26.000°.                              |                  |
| Index ranges                      | -9<=h<=9, -26<=k<=29, -13<=l<=13               |                  |
| Reflections collected             | 20044                                          |                  |
| Independent reflections           | 3932 [R(int) = 0.0409]                         |                  |
| Completeness to theta = 25.242°   | 99.8 %                                         |                  |
| Absorption correction             | Semi-empirical from equivalents                |                  |
| Max. and min. transmission        | 0.7456 and 0.6700                              |                  |
| Refinement method                 | Full-matrix least-squares on F <sup>2</sup>    |                  |
| Data / restraints / parameters    | 3932 / 0 / 266                                 |                  |
| Goodness-of-fit on F <sup>2</sup> | 1.045                                          |                  |

|                                      |                                    |
|--------------------------------------|------------------------------------|
| Final R indices [ $I > 2\sigma(I)$ ] | R1 = 0.0489, wR2 = 0.1114          |
| R indices (all data)                 | R1 = 0.0735, wR2 = 0.1282          |
| Extinction coefficient               | 0.028(3)                           |
| Largest diff. peak and hole          | 0.194 and -0.143 e.Å <sup>-3</sup> |

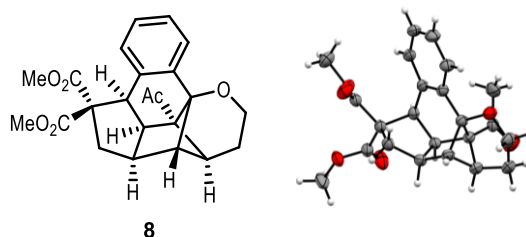

**Supplementary Figure 7.** X-Ray crystal structure of **8** (CCDC 2306014) (The crystal was obtained by slow evaporation of its solution of DCM and PE).

**Supplementary Table 7.** Crystal data and structure refinement for mj22259\_0m.

|                                   |                                                |                    |
|-----------------------------------|------------------------------------------------|--------------------|
| Identification code               | mj22259_0m                                     |                    |
| Empirical formula                 | C <sub>23</sub> H <sub>24</sub> O <sub>6</sub> |                    |
| Formula weight                    | 396.42                                         |                    |
| Temperature                       | 213 K                                          |                    |
| Wavelength                        | 1.34139 Å                                      |                    |
| Crystal system                    | Triclinic                                      |                    |
| Space group                       | P-1                                            |                    |
| Unit cell dimensions              | a = 9.2876(2) Å                                | a = 96.6560(10)°   |
|                                   | b = 9.8998(2) Å                                | b = 107.6530(10)°  |
|                                   | c = 11.7254(2) Å                               | g = 105.5850(10)°. |
| Volume                            | 966.41(3) Å <sup>3</sup>                       |                    |
| Z                                 | 2                                              |                    |
| Density (calculated)              | 1.362 Mg/m <sup>3</sup>                        |                    |
| Absorption coefficient            | 0.515 mm <sup>-1</sup>                         |                    |
| F(000)                            | 420                                            |                    |
| Crystal size                      | 0.07 x 0.07 x 0.05 mm <sup>3</sup>             |                    |
| Theta range for data collection   | 3.524 to 55.046°.                              |                    |
| Index ranges                      | -11 ≤ h ≤ 11, -12 ≤ k ≤ 11, -14 ≤ l ≤ 14       |                    |
| Reflections collected             | 12960                                          |                    |
| Independent reflections           | 3600 [R(int) = 0.0380]                         |                    |
| Completeness to theta = 53.594°   | 97.4 %                                         |                    |
| Absorption correction             | Semi-empirical from equivalents                |                    |
| Max. and min. transmission        | 0.7508 and 0.6660                              |                    |
| Refinement method                 | Full-matrix least-squares on F <sup>2</sup>    |                    |
| Data / restraints / parameters    | 3600 / 0 / 265                                 |                    |
| Goodness-of-fit on F <sup>2</sup> | 1.052                                          |                    |
| Final R indices [I > 2σ(I)]       | R1 = 0.0414, wR2 = 0.1083                      |                    |
| R indices (all data)              | R1 = 0.0447, wR2 = 0.1110                      |                    |

Extinction coefficient

n/a

Largest diff. peak and hole

0.236 and -0.189 e. $\text{\AA}^{-3}$

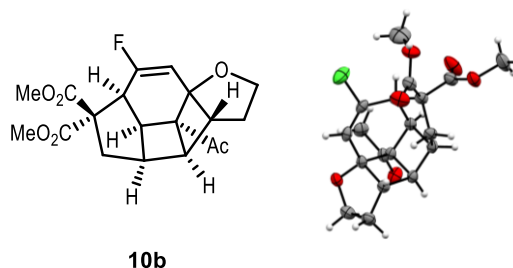

**Supplementary Figure 8.** X-Ray crystal structure of **10b** (CCDC 2306015) (The crystal was obtained by slow evaporation of the solution of DCM and PE).

**Supplementary Table 8.** Crystal data and structure refinement for mj22522\_0m.

|                                   |                                                   |                   |
|-----------------------------------|---------------------------------------------------|-------------------|
| Identification code               | mj22522_0m                                        |                   |
| Empirical formula                 | C <sub>19</sub> H <sub>21</sub> Cl O <sub>6</sub> |                   |
| Formula weight                    | 380.81                                            |                   |
| Temperature                       | 213.00 K                                          |                   |
| Wavelength                        | 1.34139 Å                                         |                   |
| Crystal system                    | Triclinic                                         |                   |
| Space group                       | P-1                                               |                   |
| Unit cell dimensions              | a = 7.36980(10) Å                                 | a = 109.4910(10)° |
|                                   | b = 11.0888(2) Å                                  | b = 107.1150(10)° |
|                                   | c = 12.4624(2) Å                                  | g = 95.8060(10)°  |
| Volume                            | 894.83(3) Å <sup>3</sup>                          |                   |
| Z                                 | 2                                                 |                   |
| Density (calculated)              | 1.413 Mg/m <sup>3</sup>                           |                   |
| Absorption coefficient            | 1.435 mm <sup>-1</sup>                            |                   |
| F(000)                            | 400                                               |                   |
| Crystal size                      | 0.07 x 0.07 x 0.05 mm <sup>3</sup>                |                   |
| Theta range for data collection   | 3.772 to 54.944°                                  |                   |
| Index ranges                      | -8 ≤ h ≤ 8, -13 ≤ k ≤ 13, -15 ≤ l ≤ 15            |                   |
| Reflections collected             | 15581                                             |                   |
| Independent reflections           | 3354 [R(int) = 0.0379]                            |                   |
| Completeness to theta = 53.594°   | 98.7 %                                            |                   |
| Absorption correction             | Semi-empirical from equivalents                   |                   |
| Max. and min. transmission        | 0.7508 and 0.5846                                 |                   |
| Refinement method                 | Full-matrix least-squares on F <sup>2</sup>       |                   |
| Data / restraints / parameters    | 3354 / 0 / 238                                    |                   |
| Goodness-of-fit on F <sup>2</sup> | 1.103                                             |                   |
| Final R indices [I > 2σ(I)]       | R1 = 0.0505, wR2 = 0.1491                         |                   |

R indices (all data)

$R1 = 0.0551$ ,  $wR2 = 0.1527$

Extinction coefficient

n/a

Largest diff. peak and hole

0.280 and -0.684 e.Å<sup>-3</sup>



## 6. Copies of NMR Spectra

$^1\text{H}$  NMR Spectrum (400 MHz,  $\text{CDCl}_3$ ) of **1a**

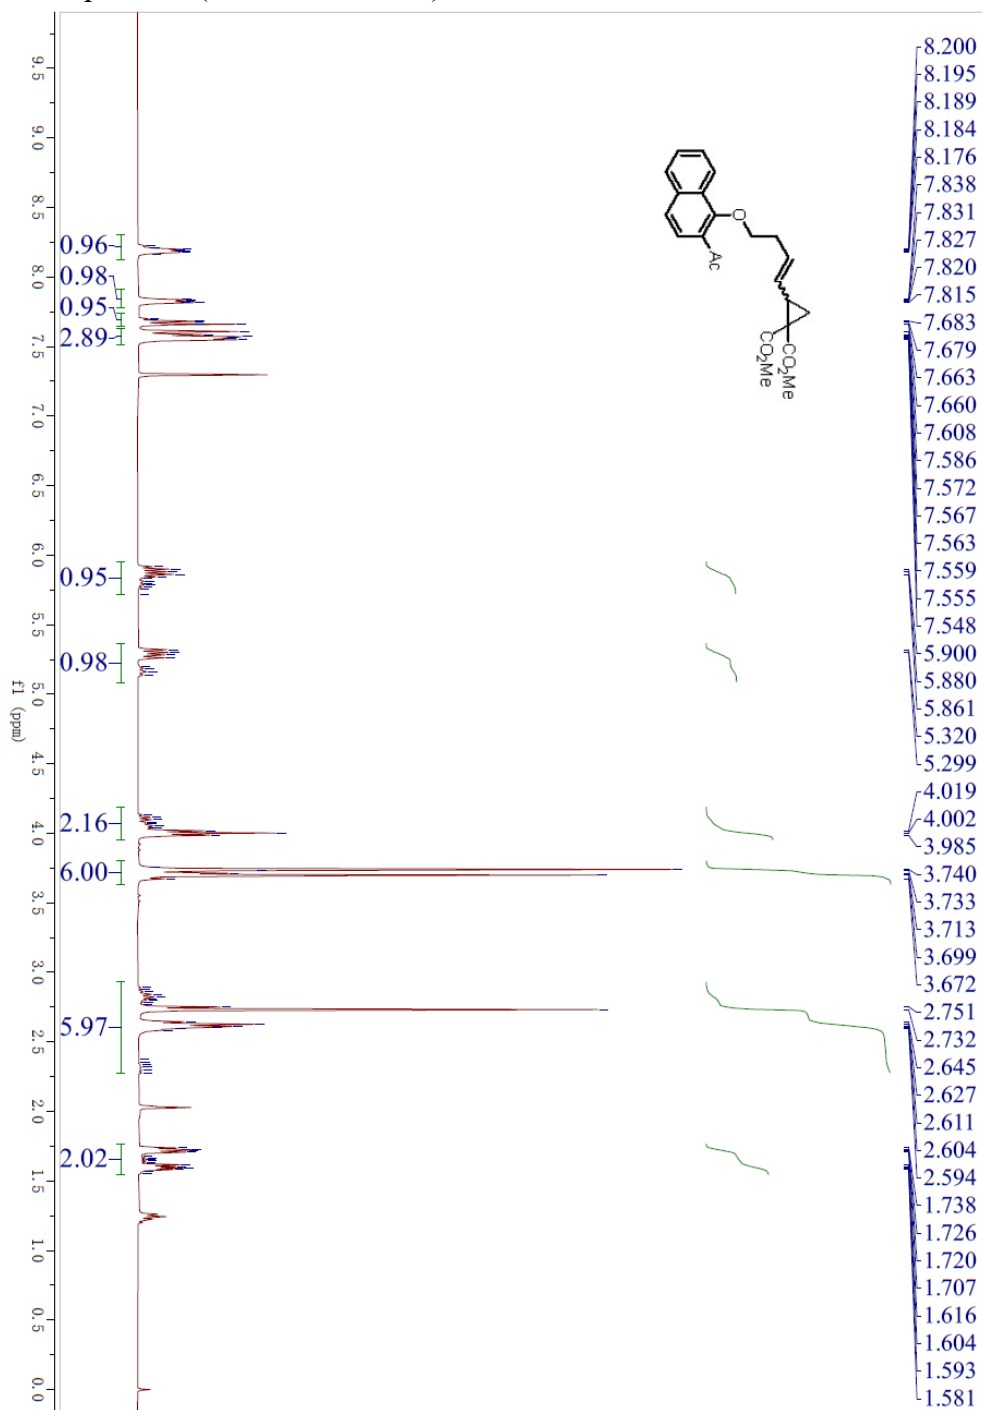

<sup>13</sup>C NMR Spectrum (100 MHz, CDCl<sub>3</sub>) of **1a**

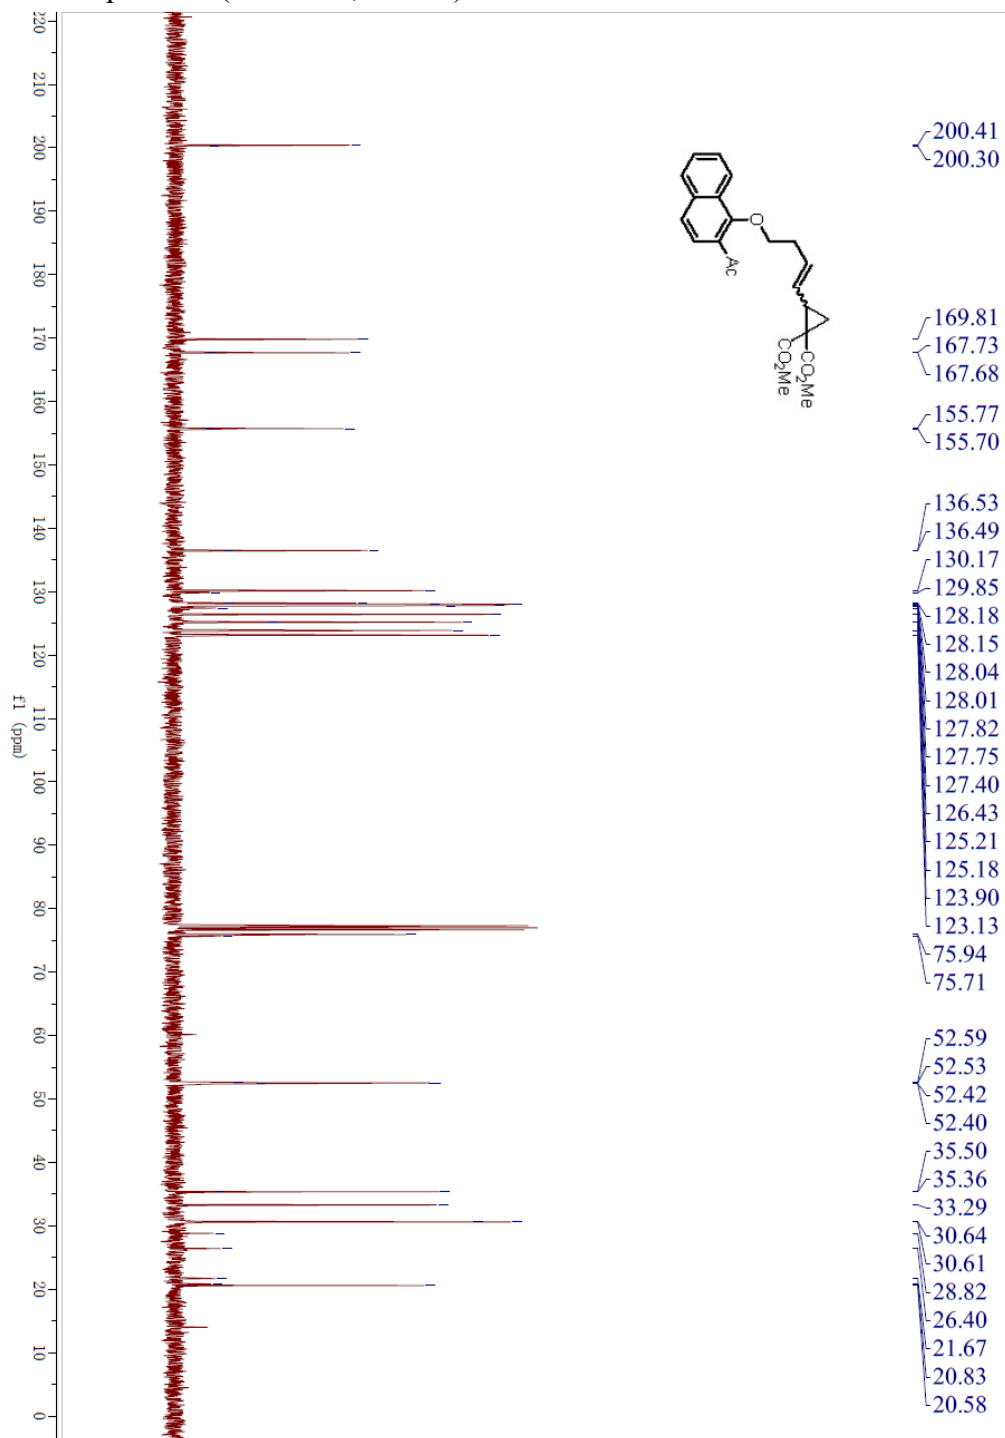

<sup>1</sup>H NMR Spectrum (400 MHz, CDCl<sub>3</sub>) of **1b**

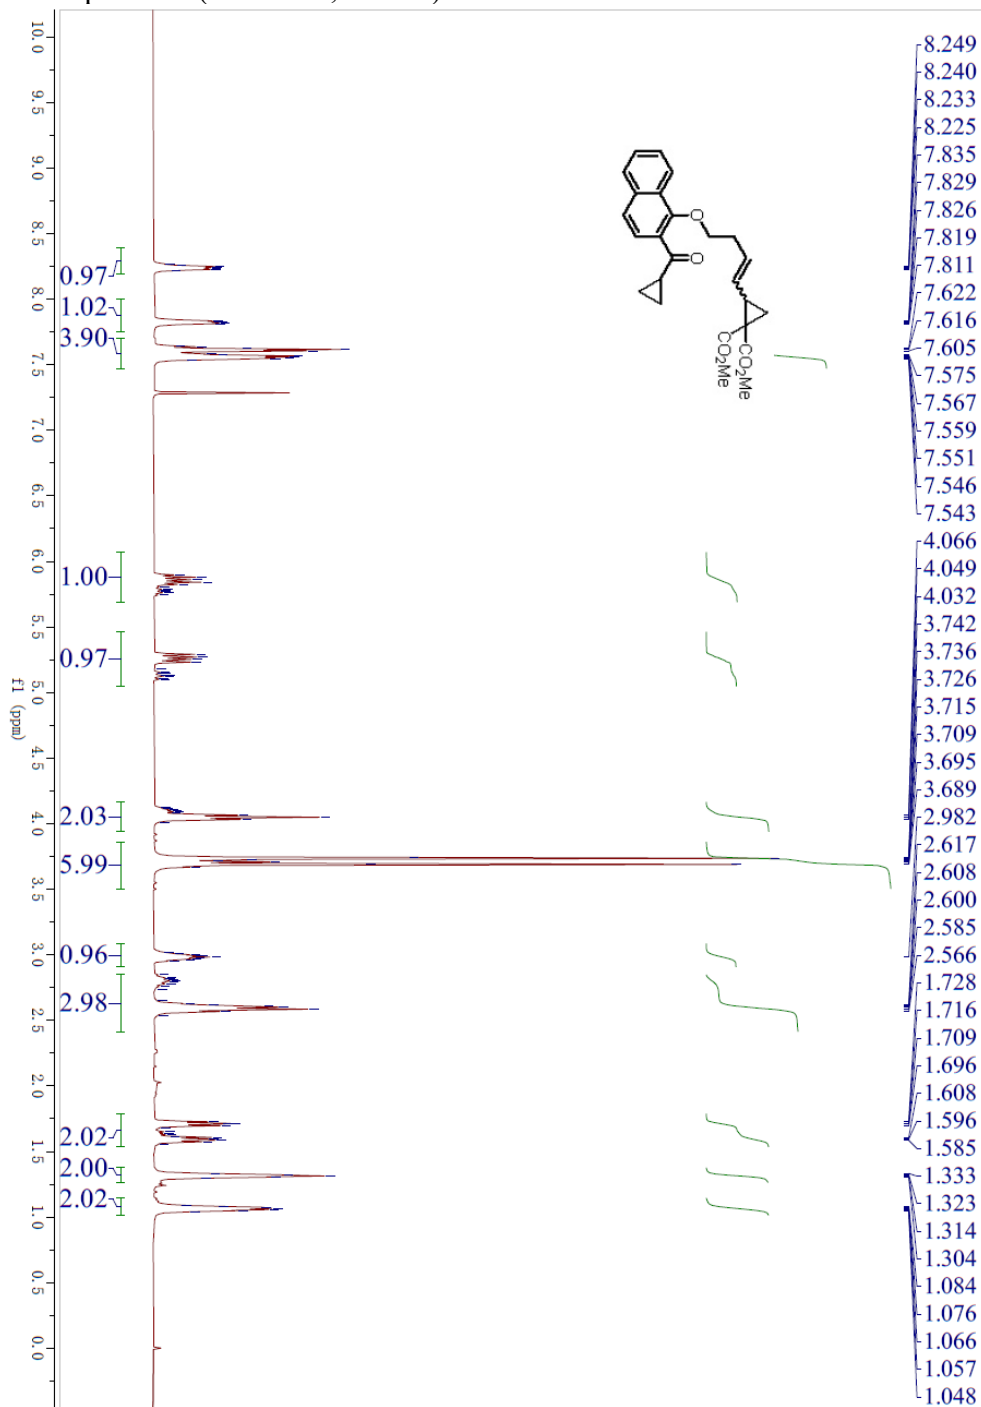

<sup>13</sup>C NMR Spectrum (100 MHz, CDCl<sub>3</sub>) of **1b**

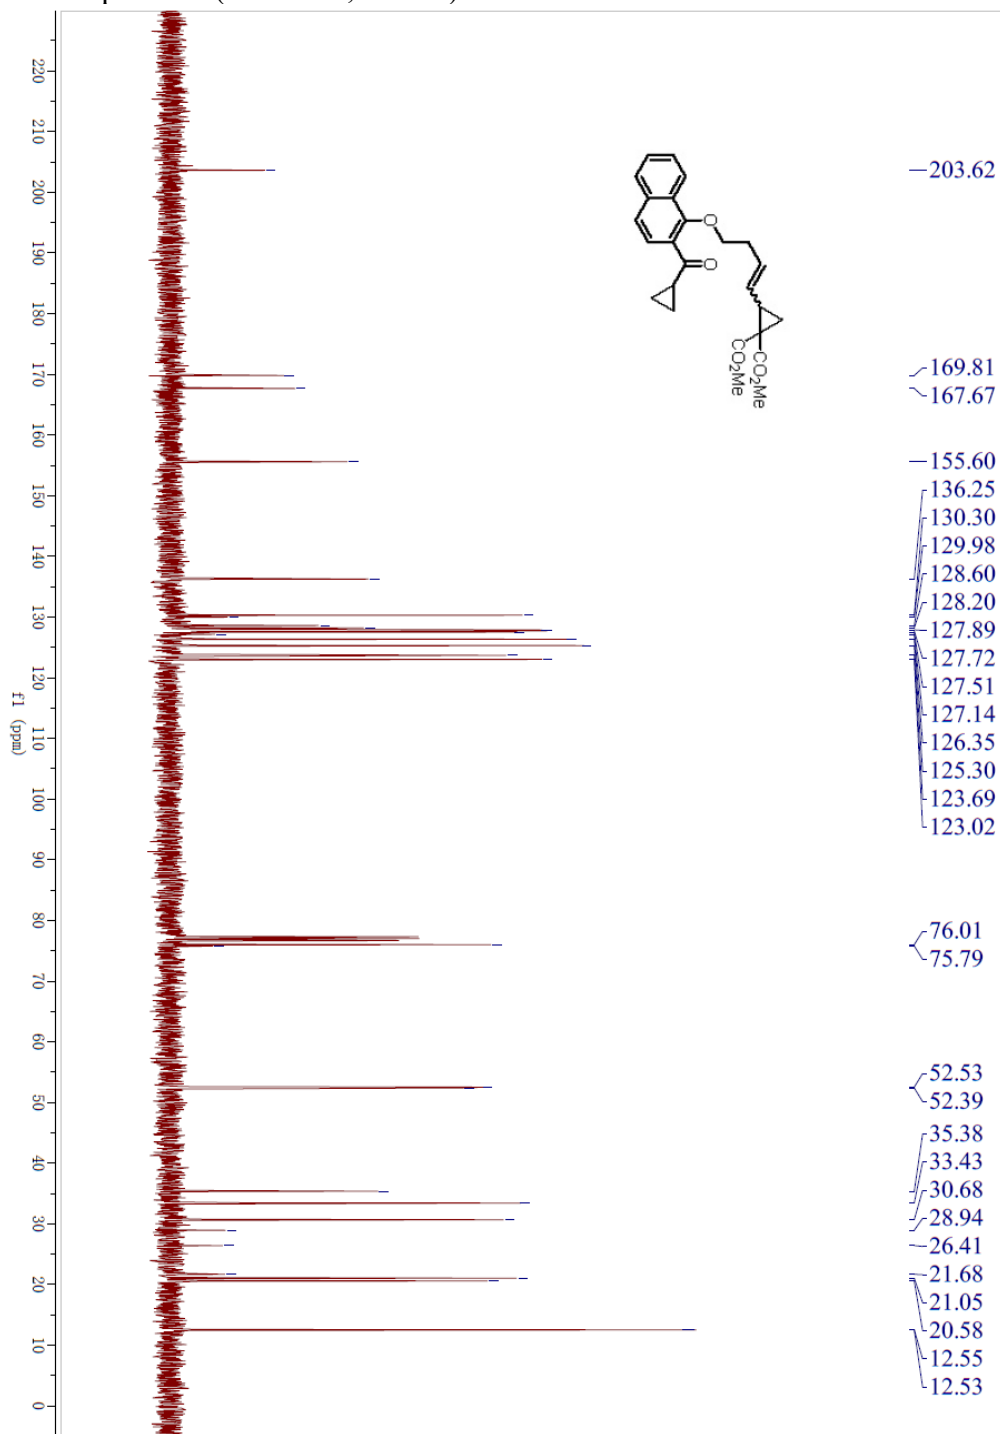

<sup>1</sup>H NMR Spectrum (400 MHz, CDCl<sub>3</sub>) of **1c**

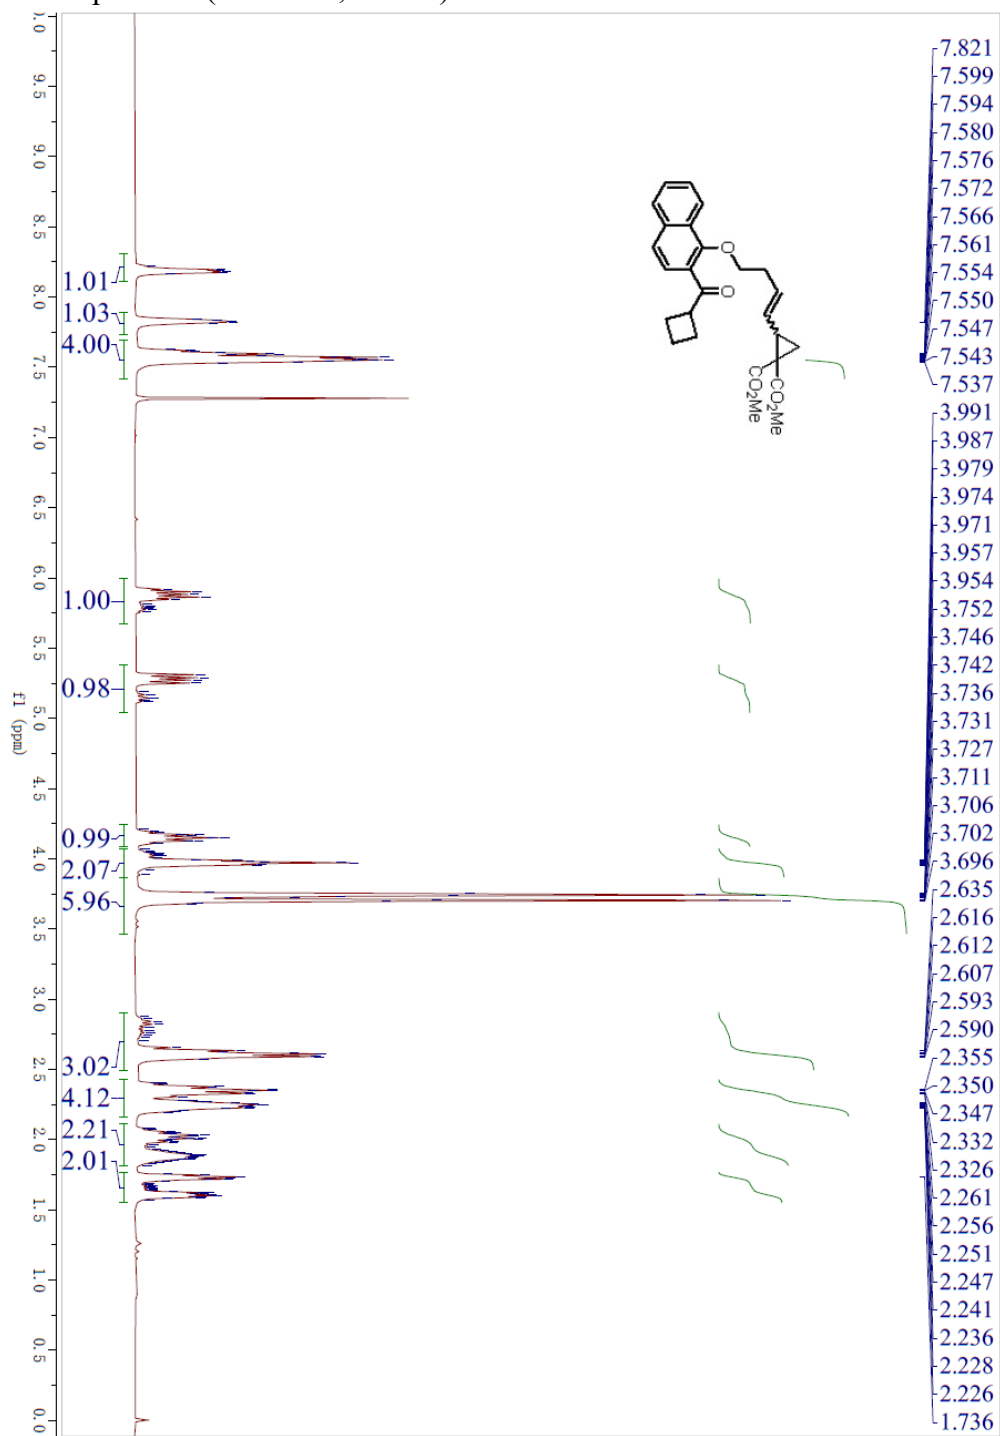

<sup>13</sup>C NMR Spectrum (100 MHz, CDCl<sub>3</sub>) of **1c**

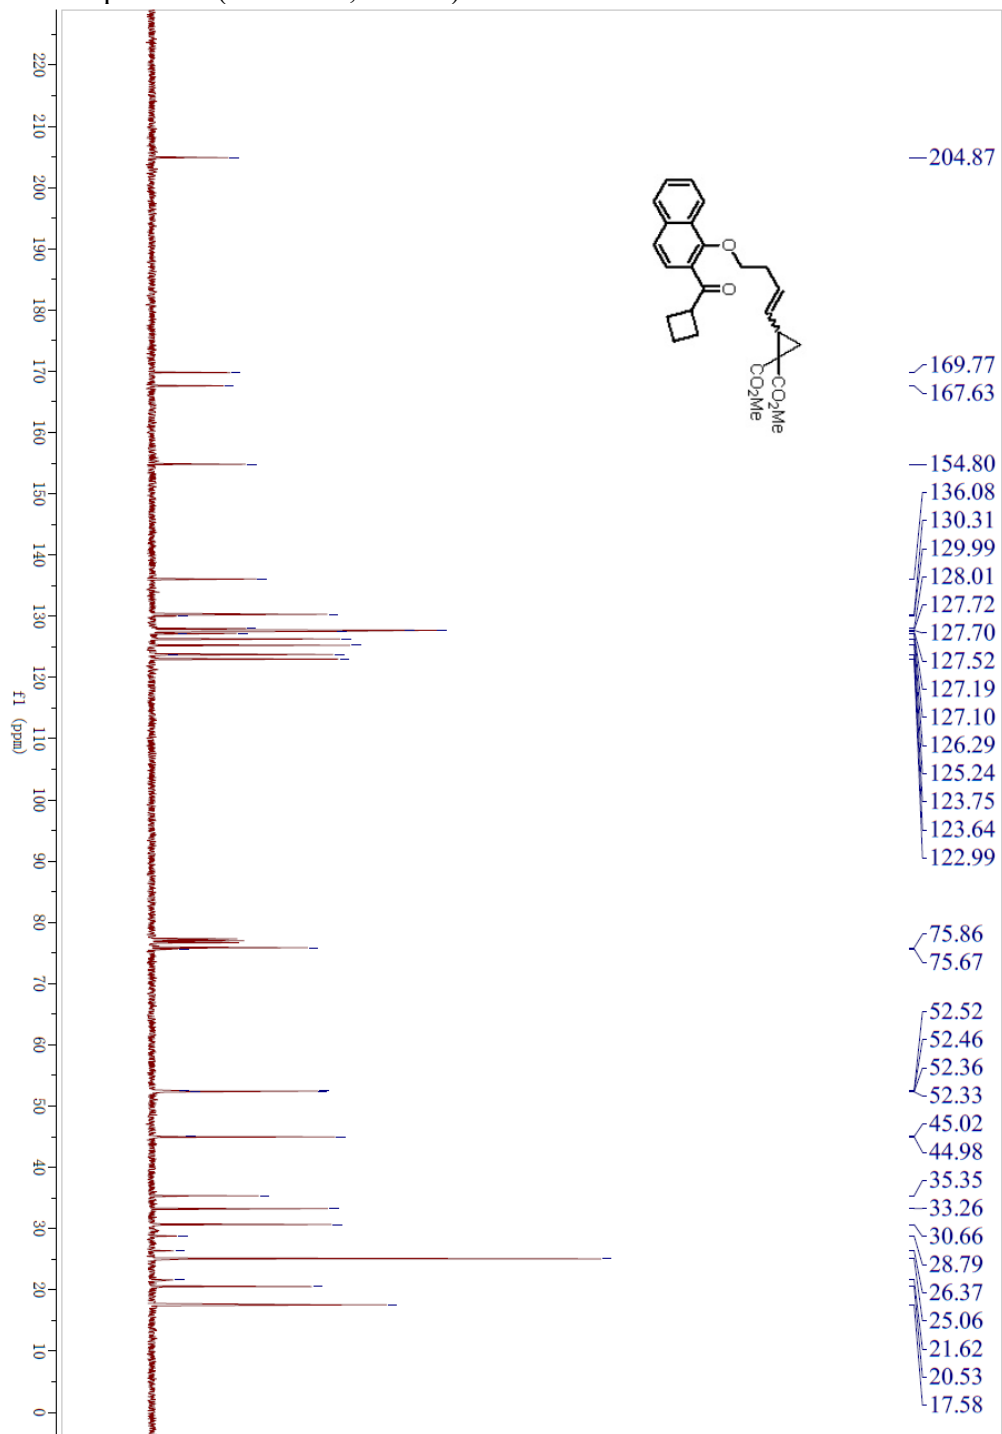

<sup>1</sup>H NMR Spectrum (400 MHz, CDCl<sub>3</sub>) of **1d**

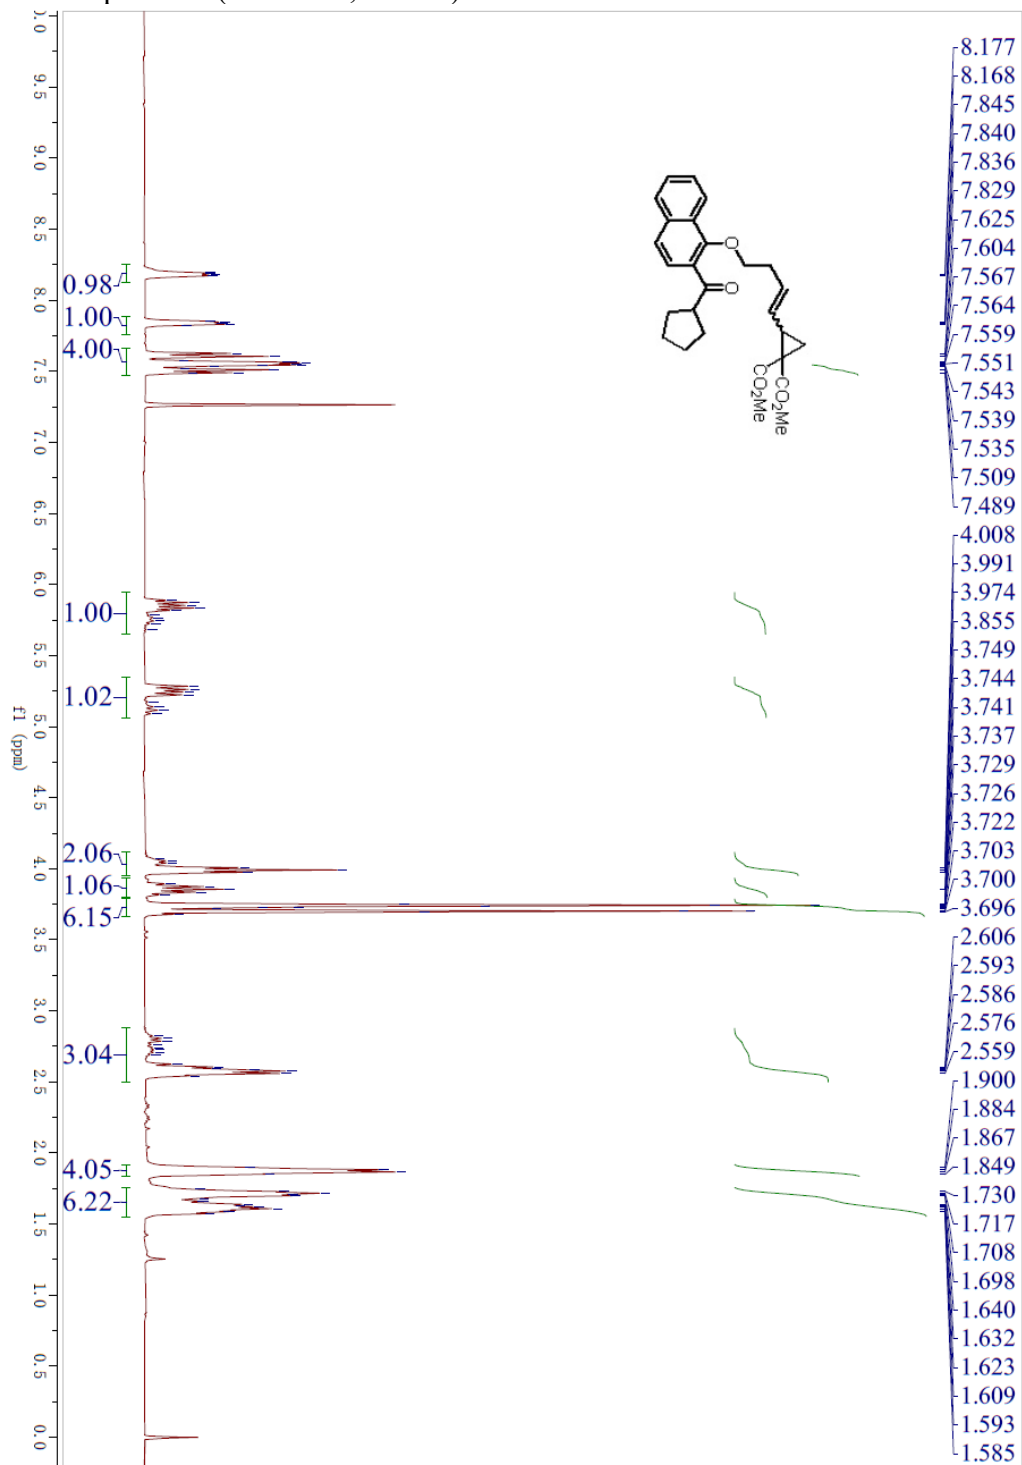

<sup>13</sup>C NMR Spectrum (100 MHz, CDCl<sub>3</sub>) of **1d**

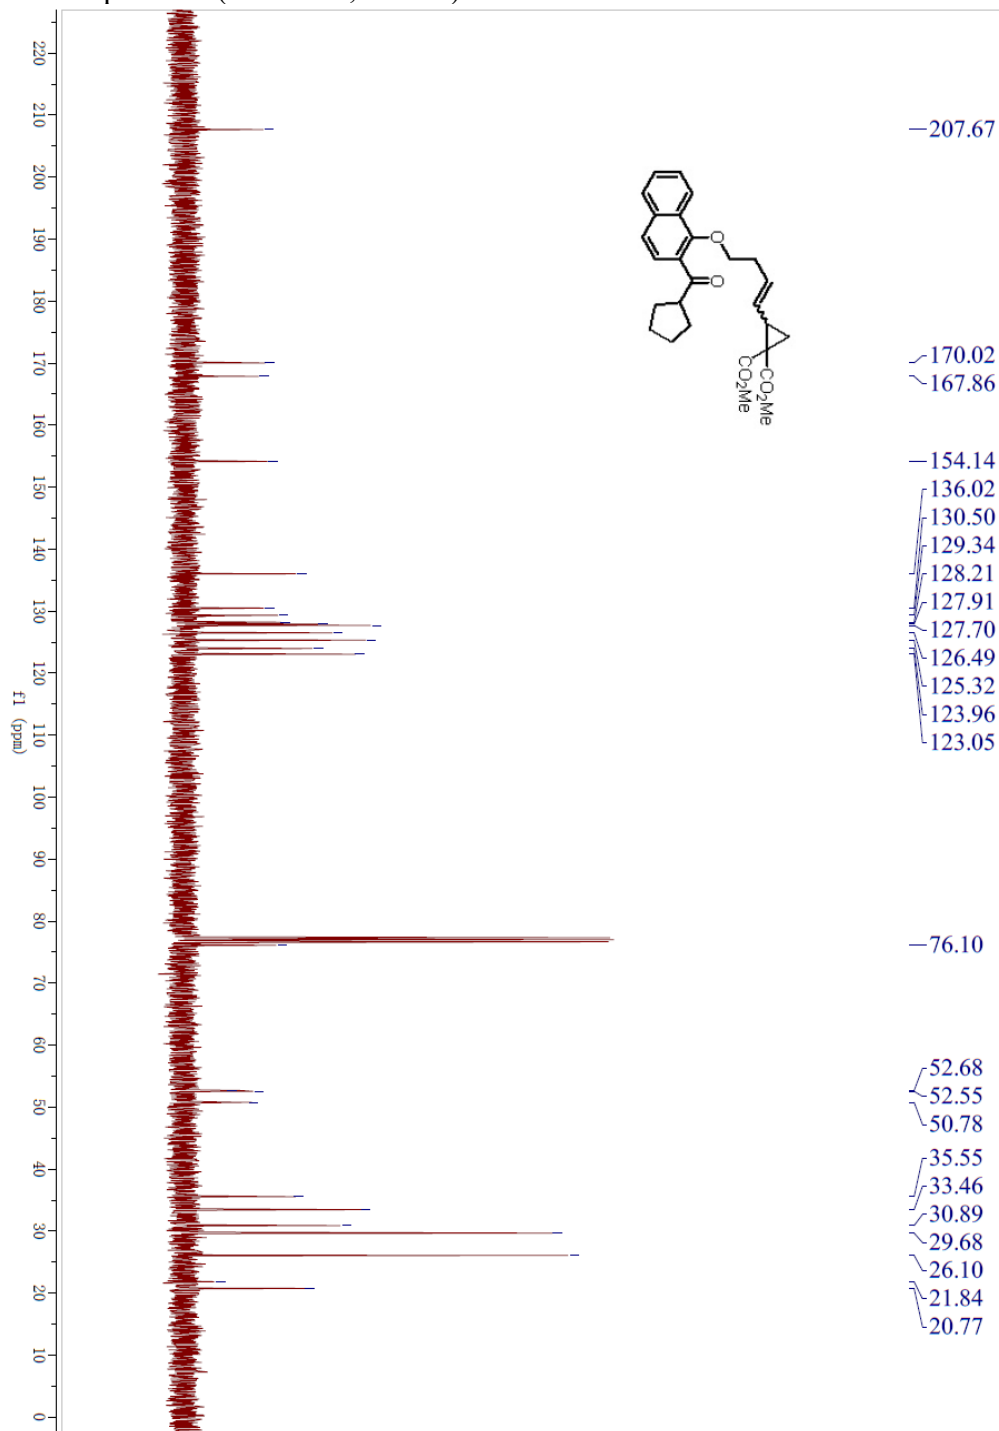



<sup>1</sup>H NMR Spectrum (400 MHz, CDCl<sub>3</sub>) of **1e**

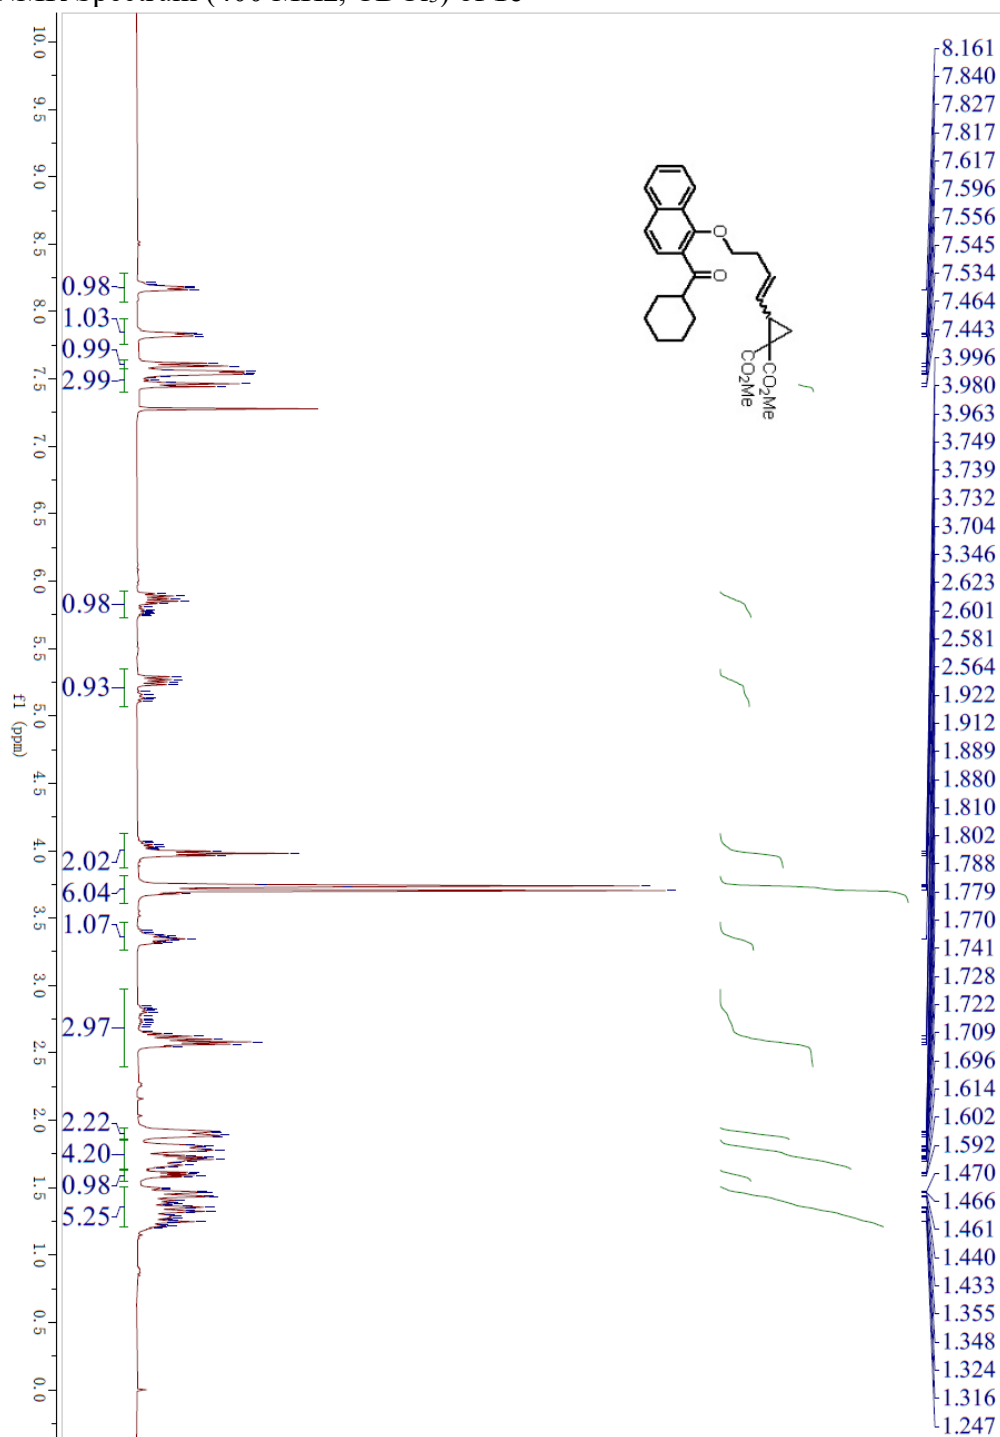

<sup>13</sup>C NMR Spectrum (100 MHz, CDCl<sub>3</sub>) of **1e**

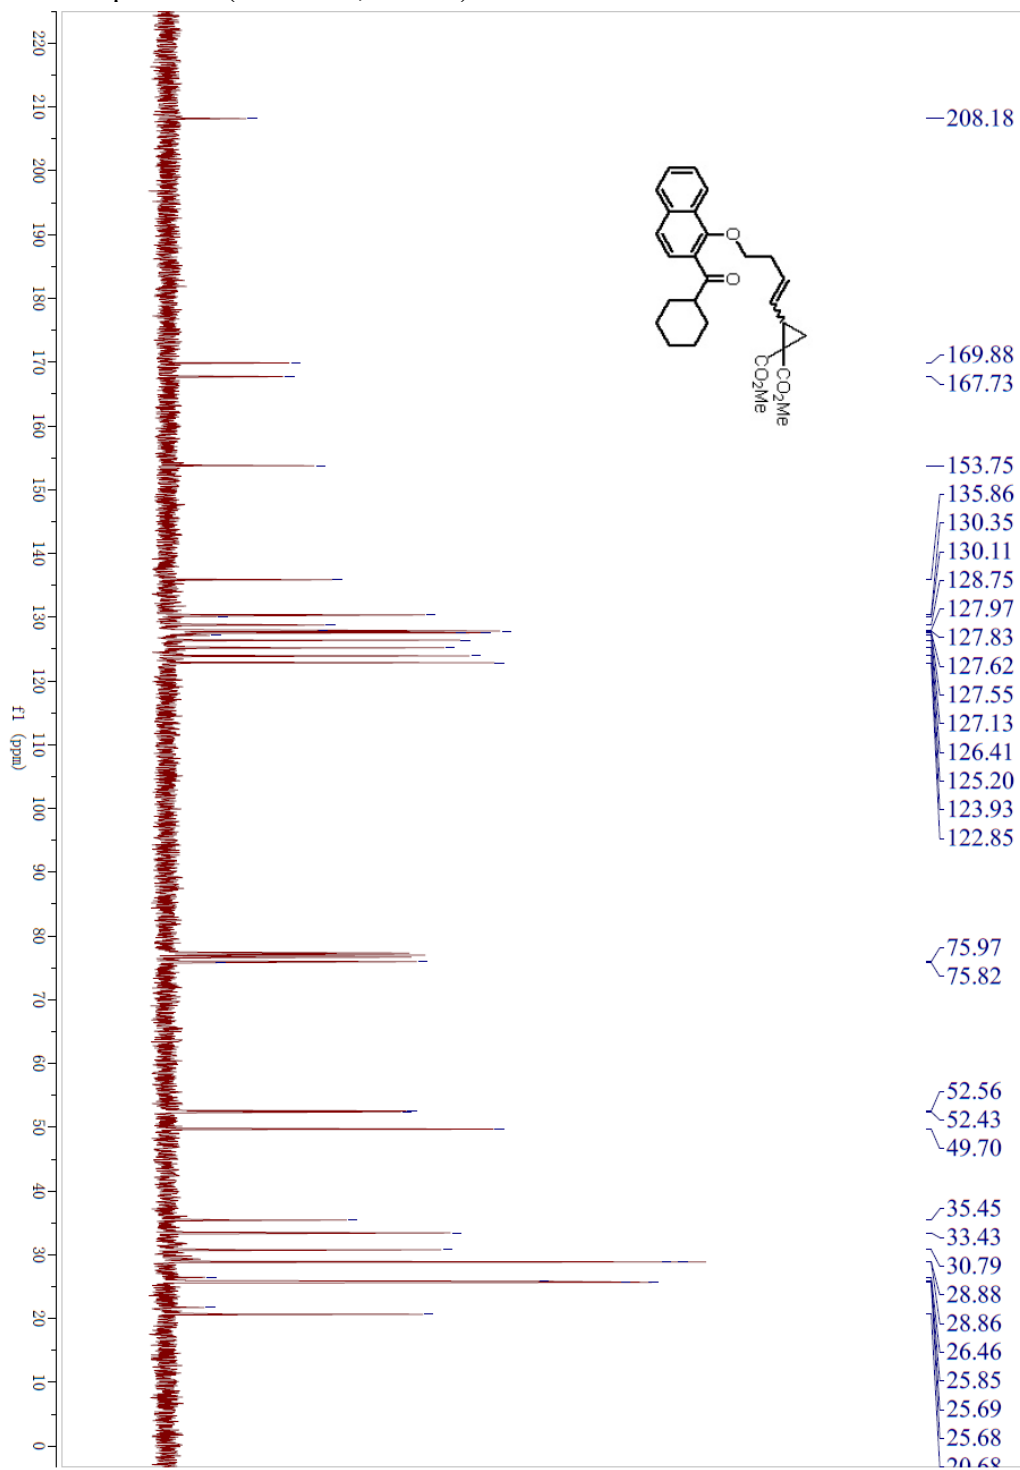

<sup>1</sup>H NMR Spectrum (400 MHz, CDCl<sub>3</sub>) of **1f**

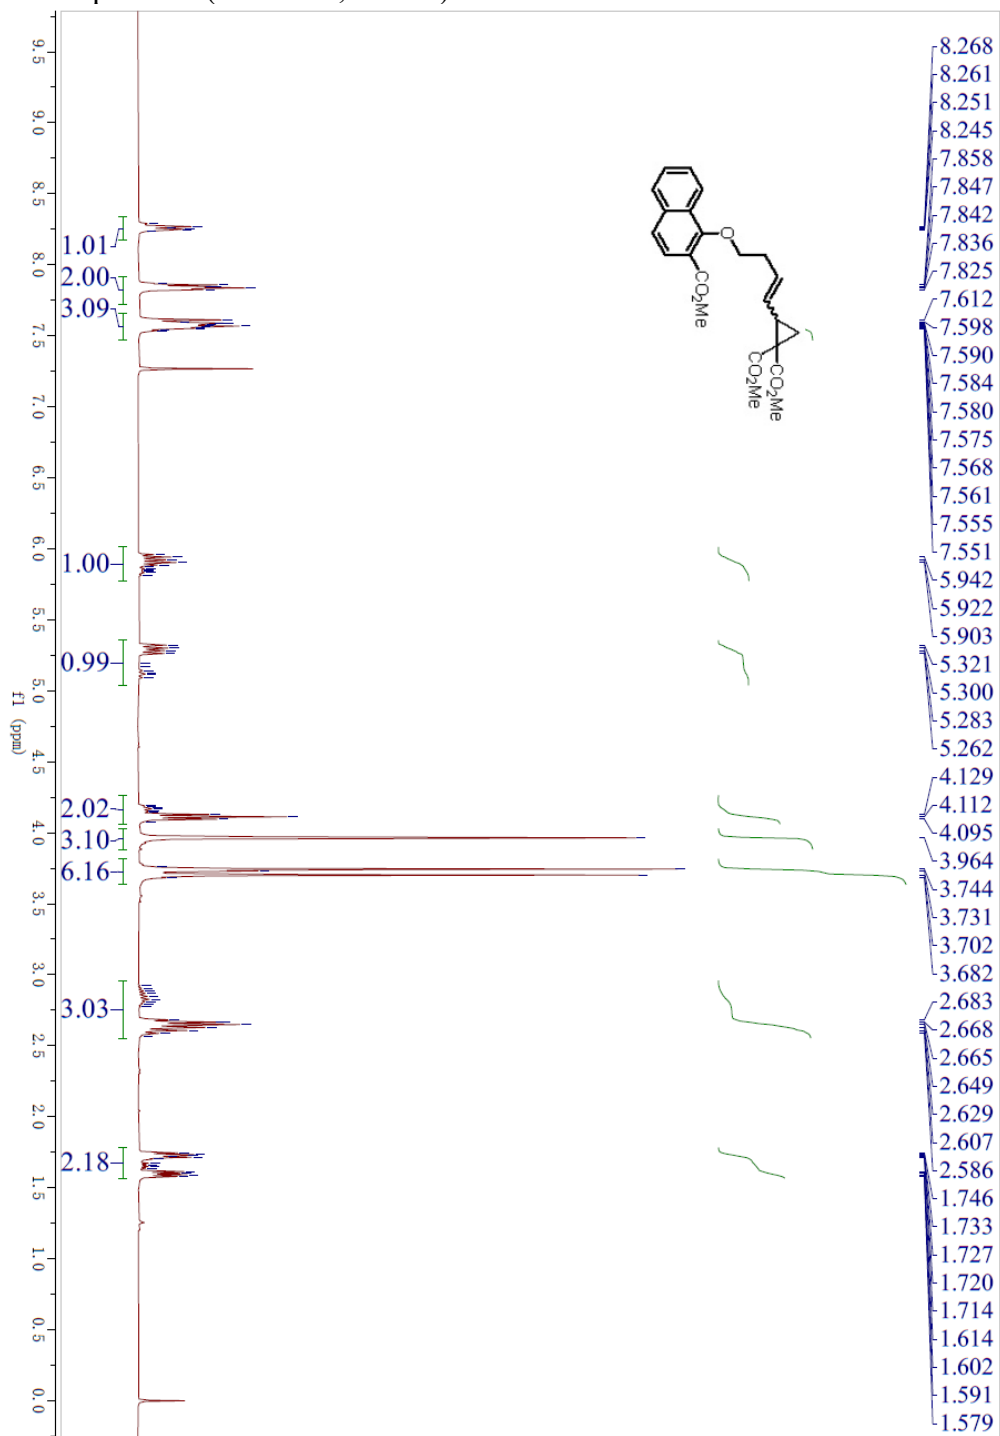

<sup>13</sup>C NMR Spectrum (100 MHz, CDCl<sub>3</sub>) of **1f**

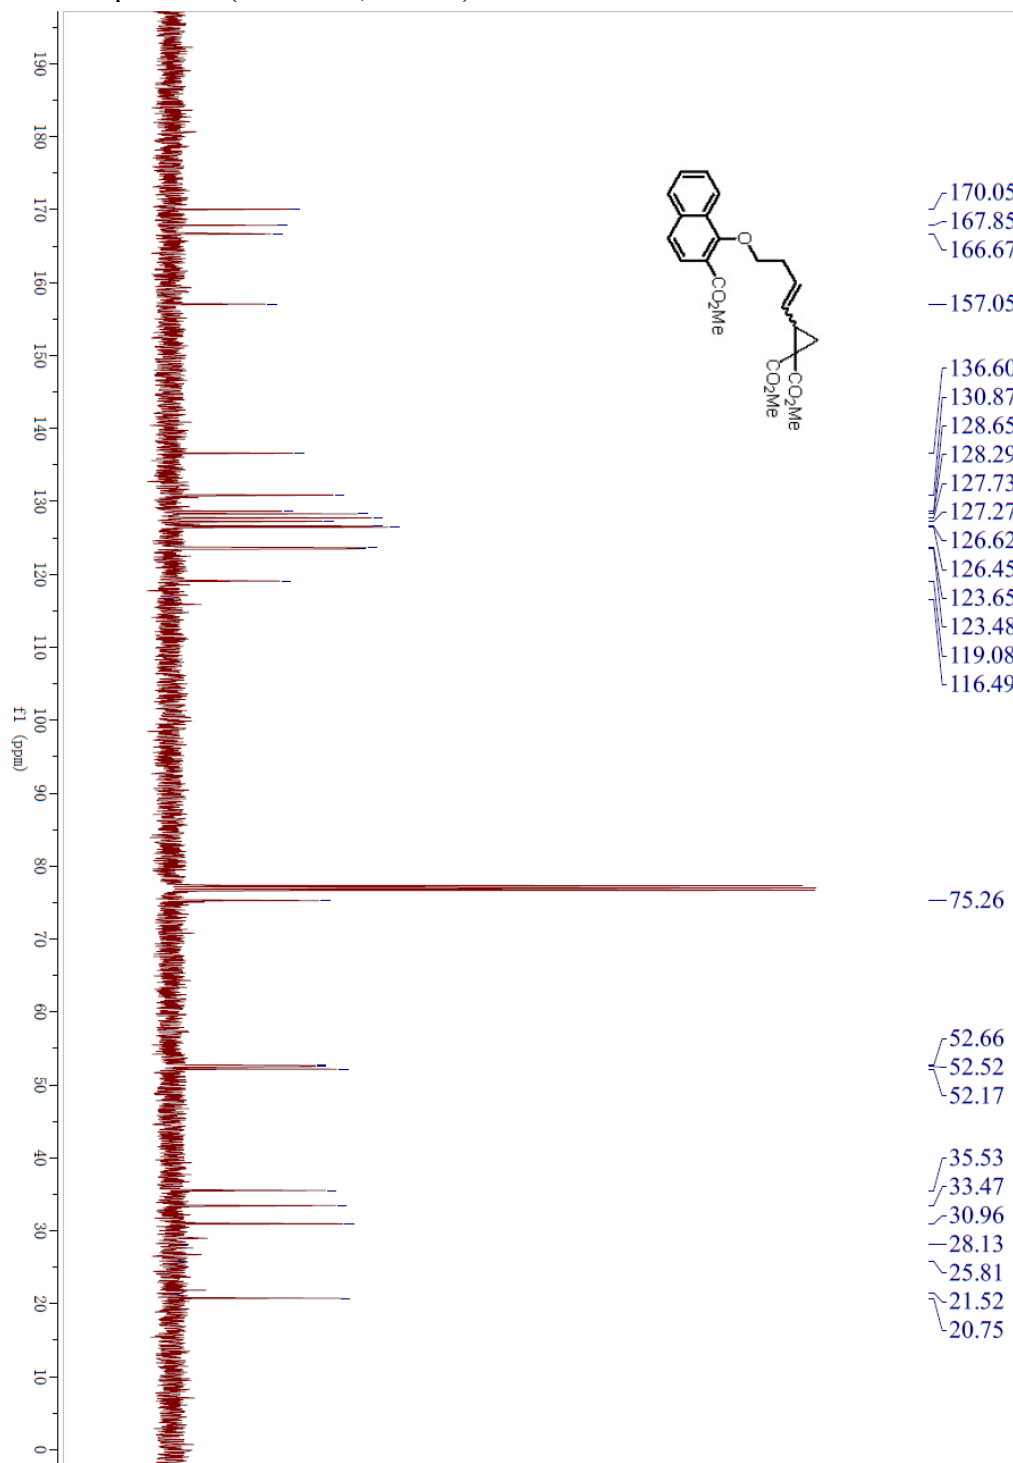

<sup>1</sup>H NMR Spectrum (400 MHz, CDCl<sub>3</sub>) of **1g**

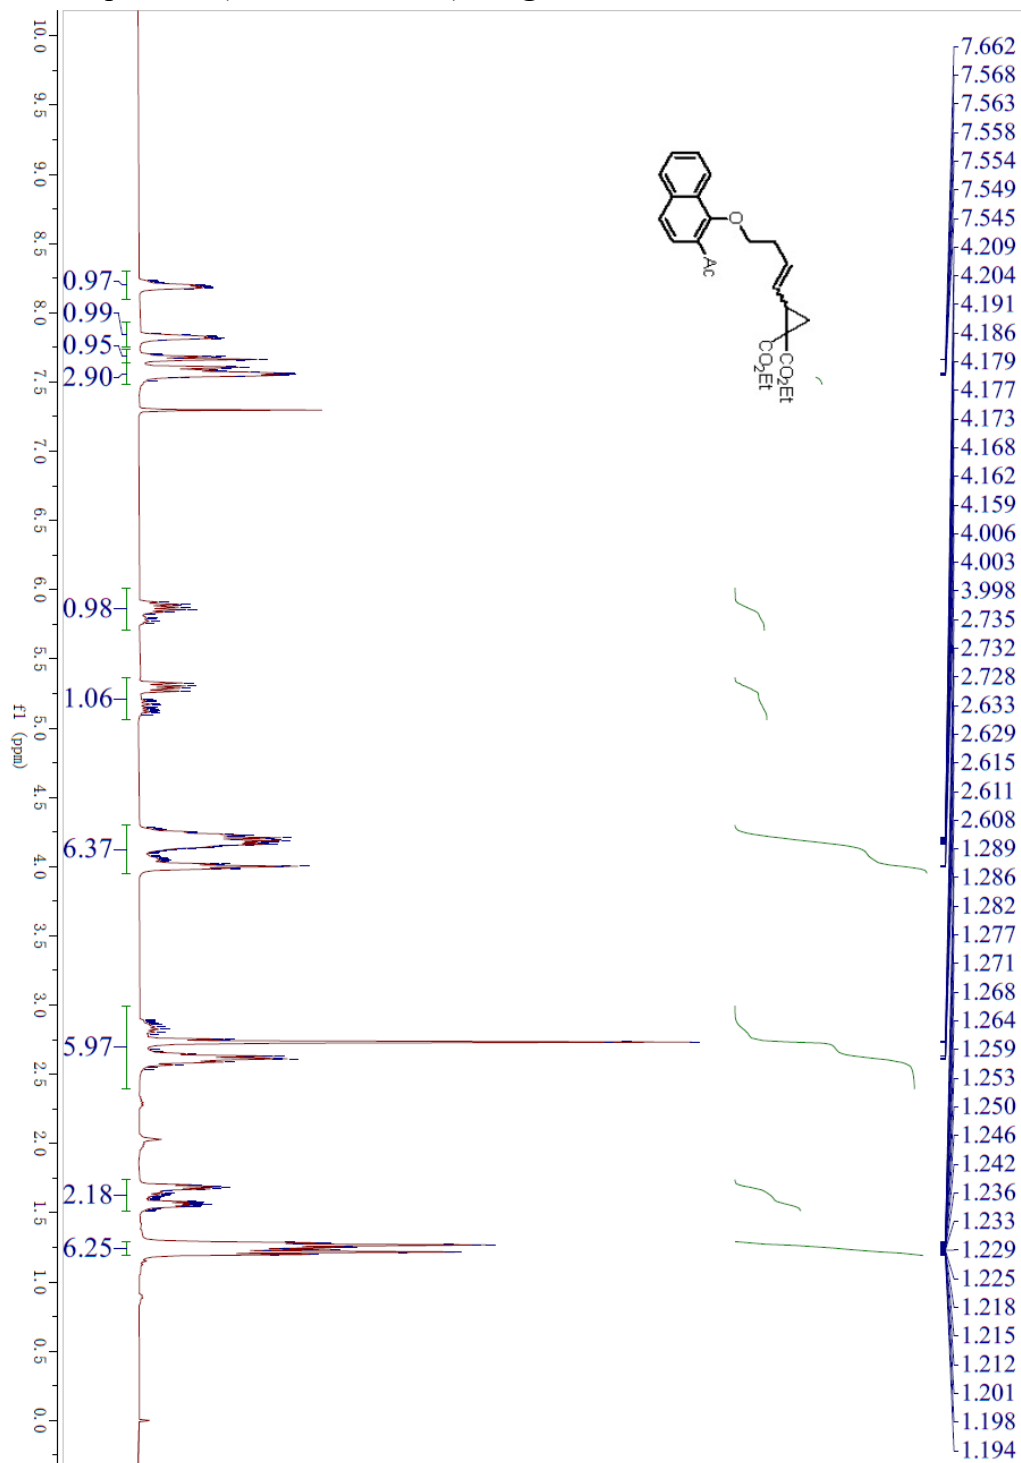

<sup>13</sup>C NMR Spectrum (100 MHz, CDCl<sub>3</sub>) of **1g**

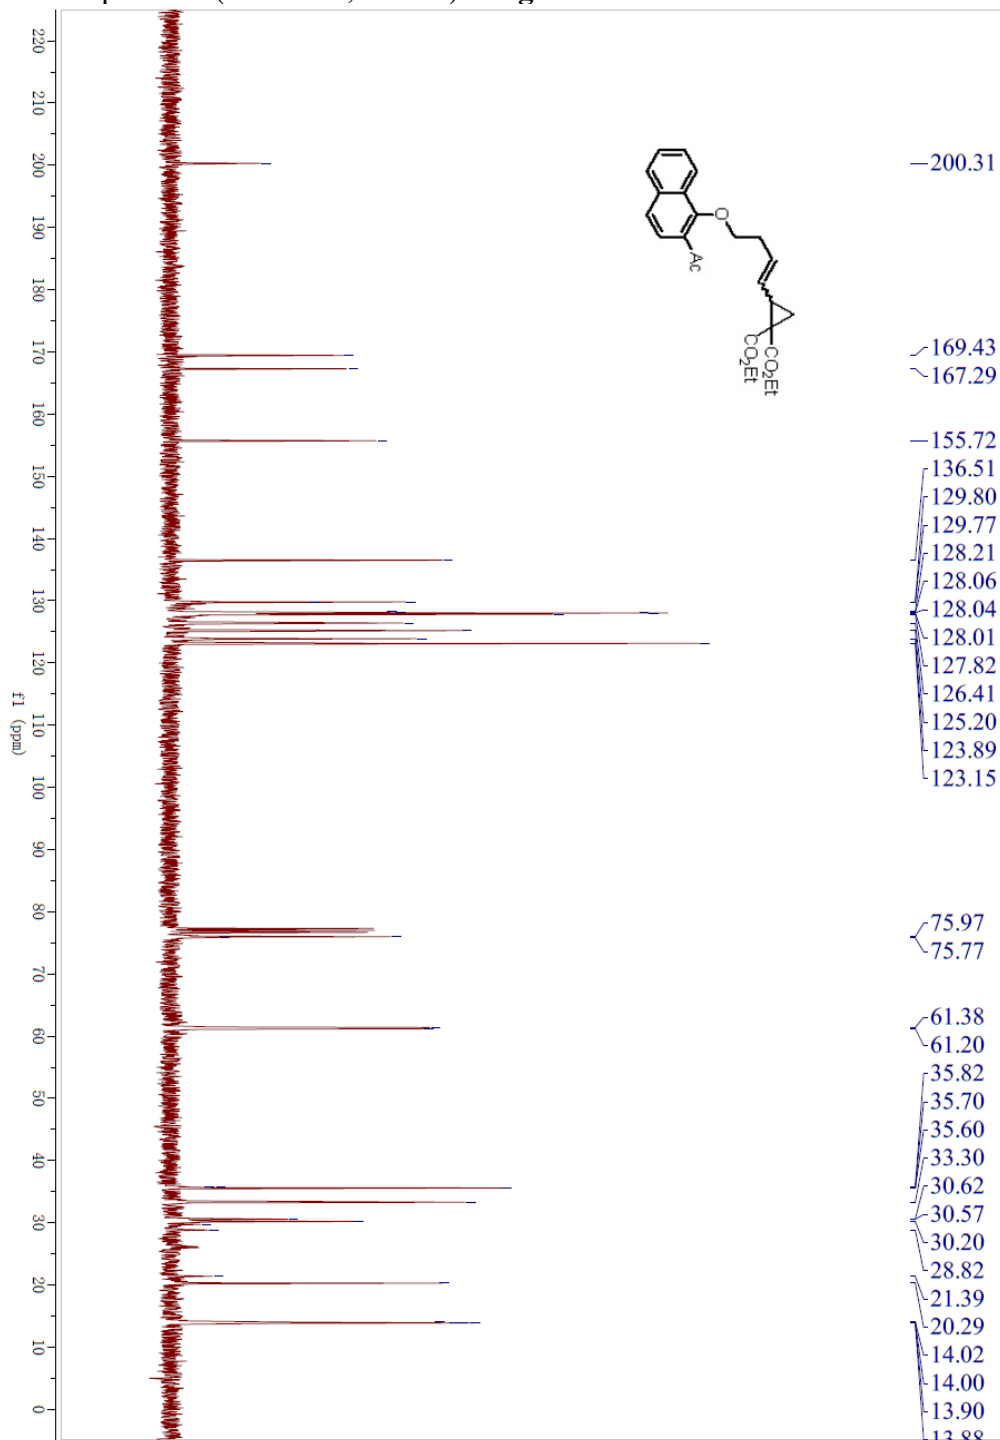

<sup>1</sup>H NMR Spectrum (400 MHz, CDCl<sub>3</sub>) of **1h**

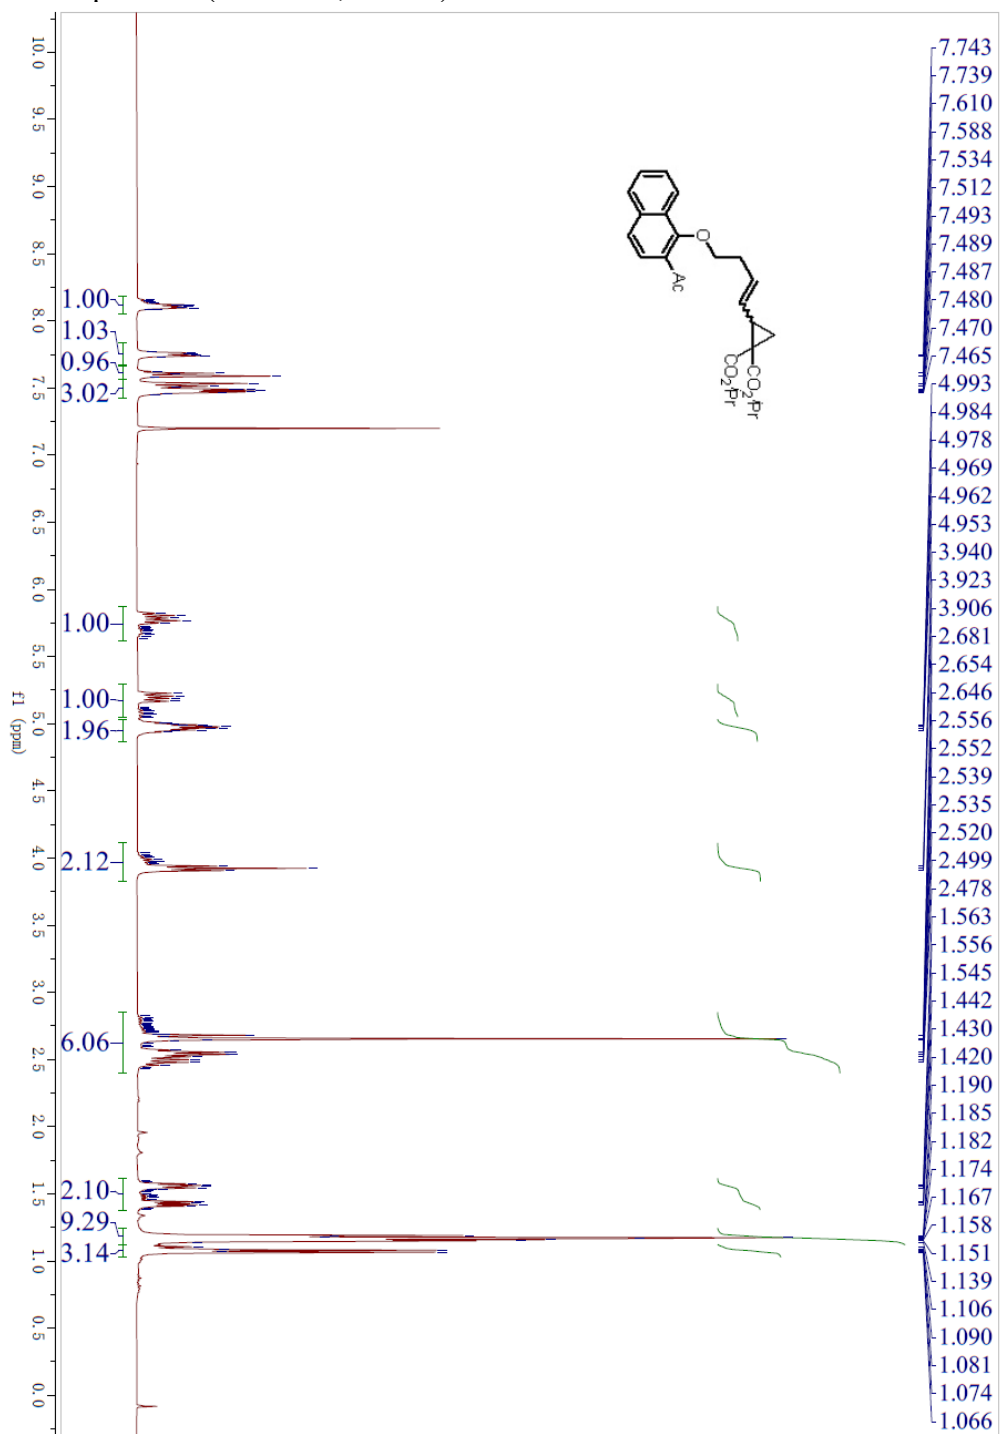

<sup>13</sup>C NMR Spectrum (100 MHz, CDCl<sub>3</sub>) of **1h**

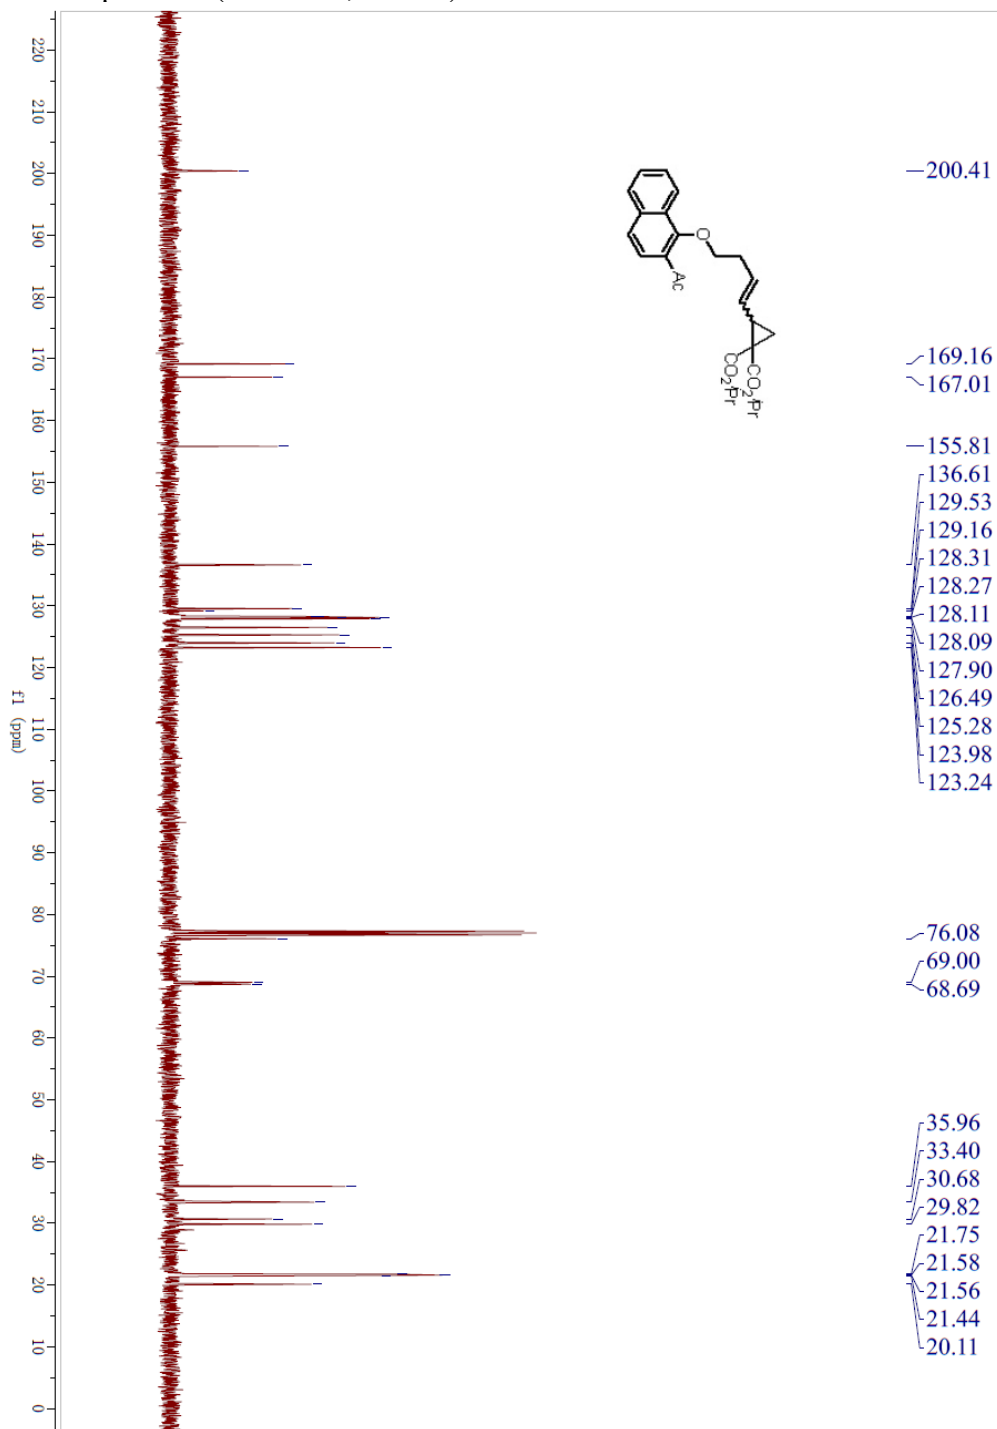



<sup>1</sup>H NMR Spectrum (400 MHz, CDCl<sub>3</sub>) of **1i**

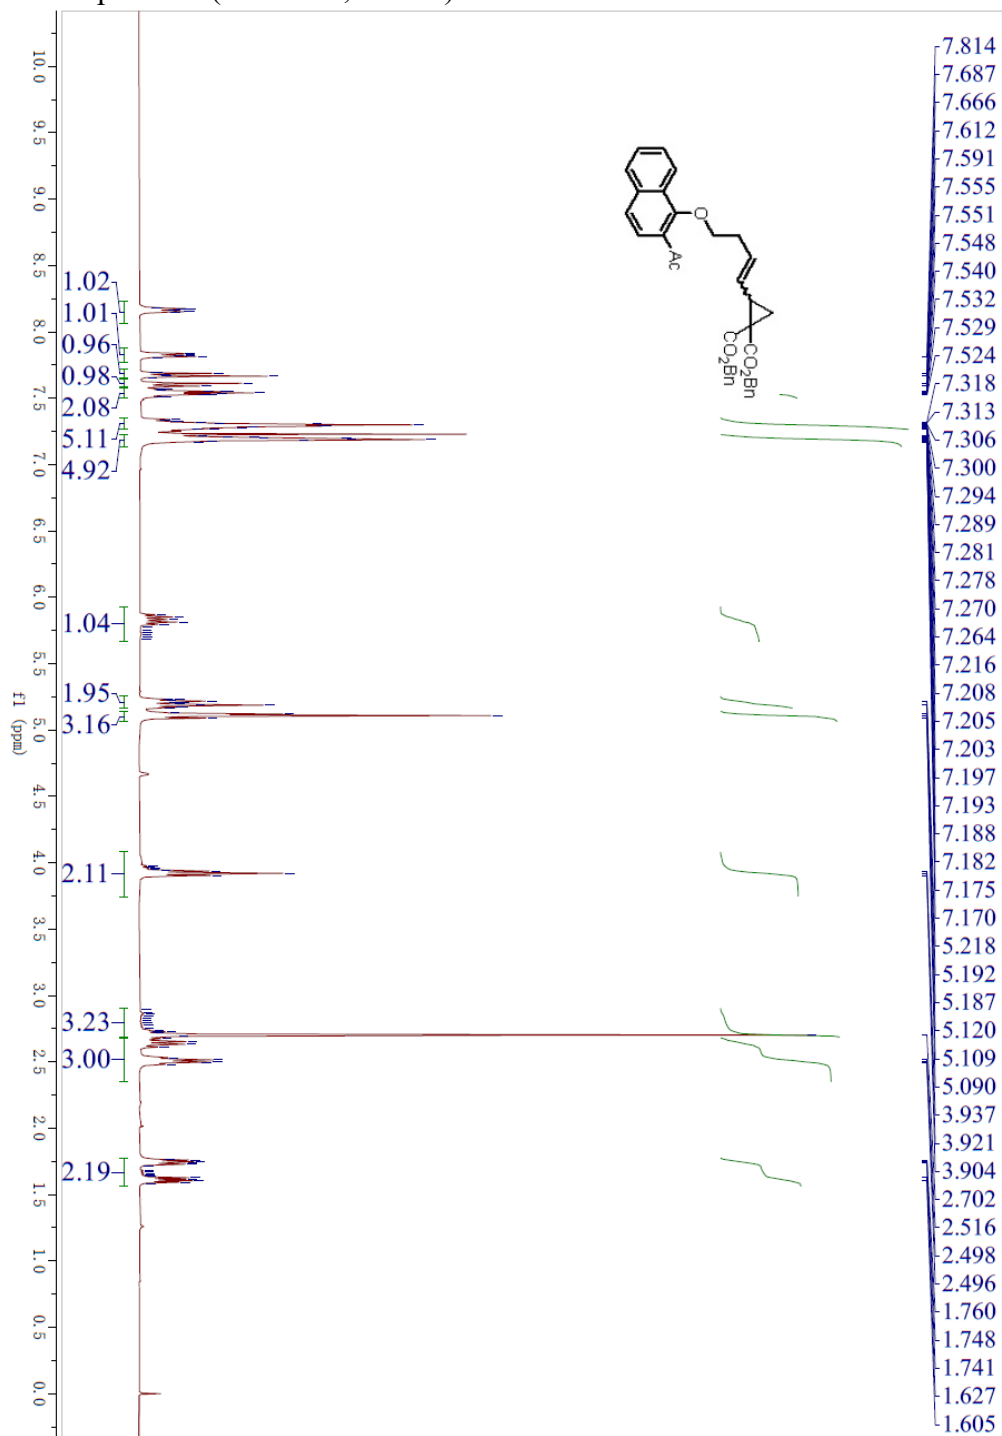

<sup>13</sup>C NMR Spectrum (100 MHz, CDCl<sub>3</sub>) of **1i**

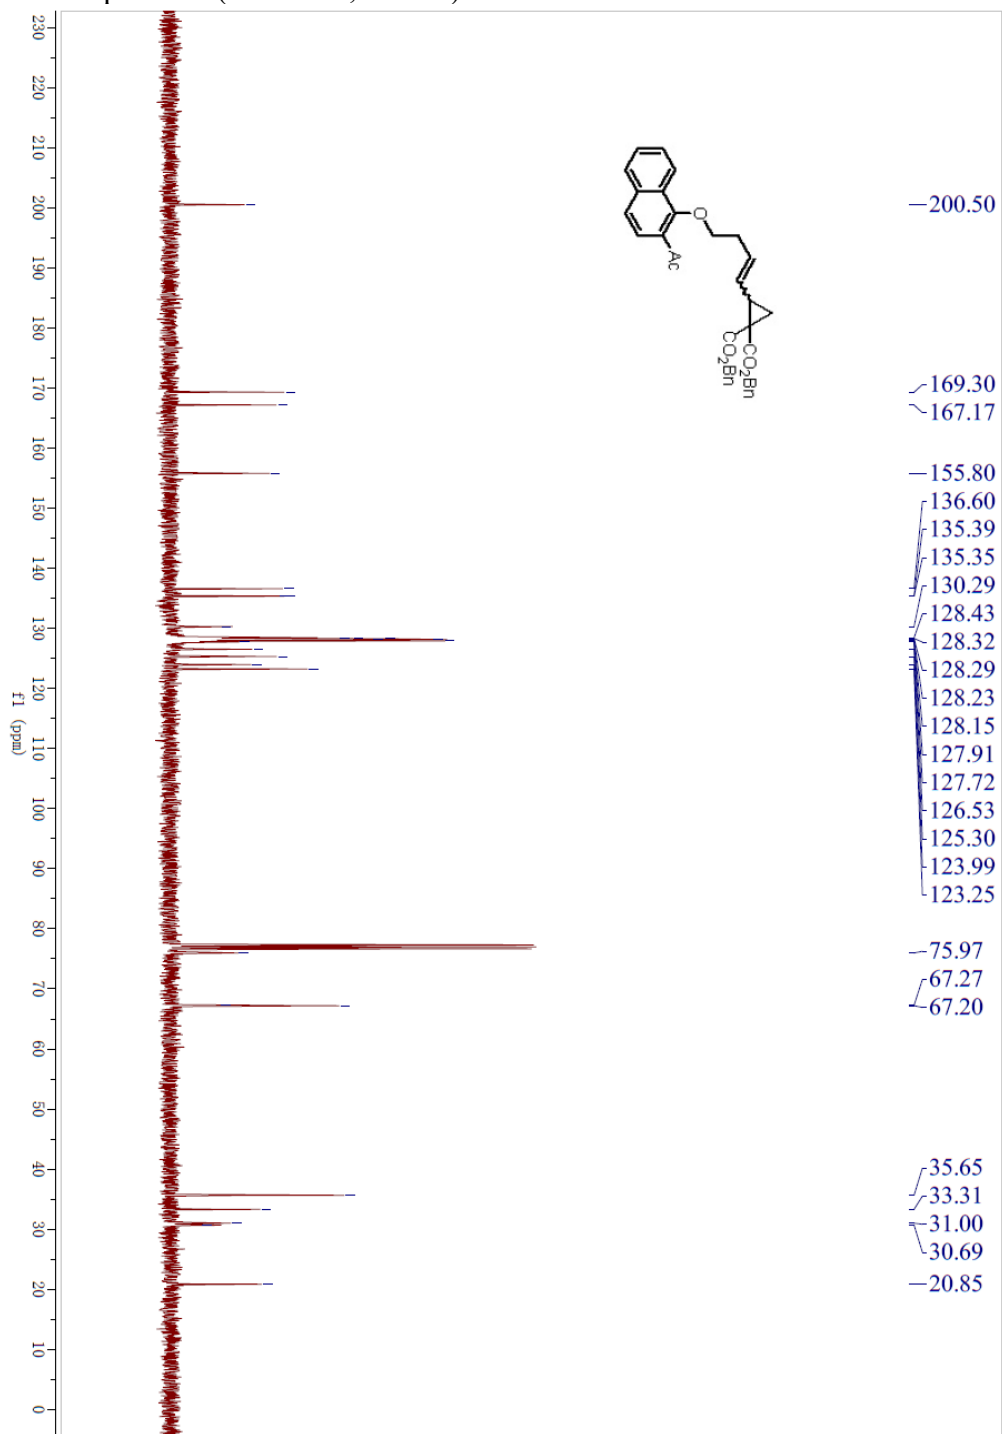

<sup>1</sup>H NMR Spectrum (400 MHz, CDCl<sub>3</sub>) of **1j**

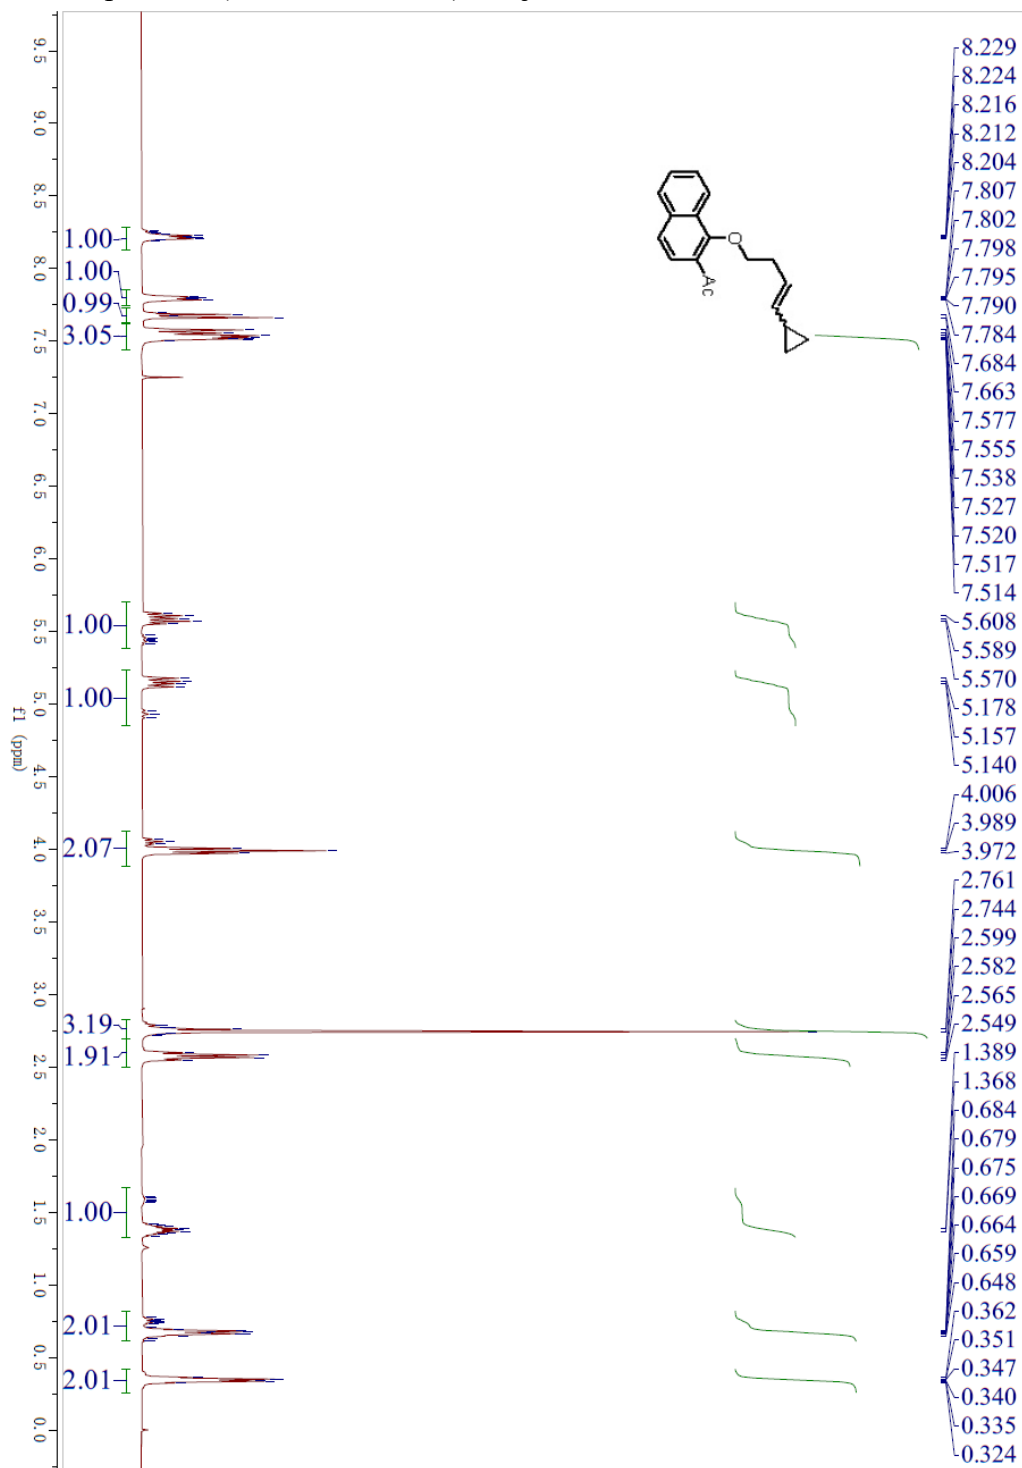

<sup>13</sup>C NMR Spectrum (100 MHz, CDCl<sub>3</sub>) of **1j**

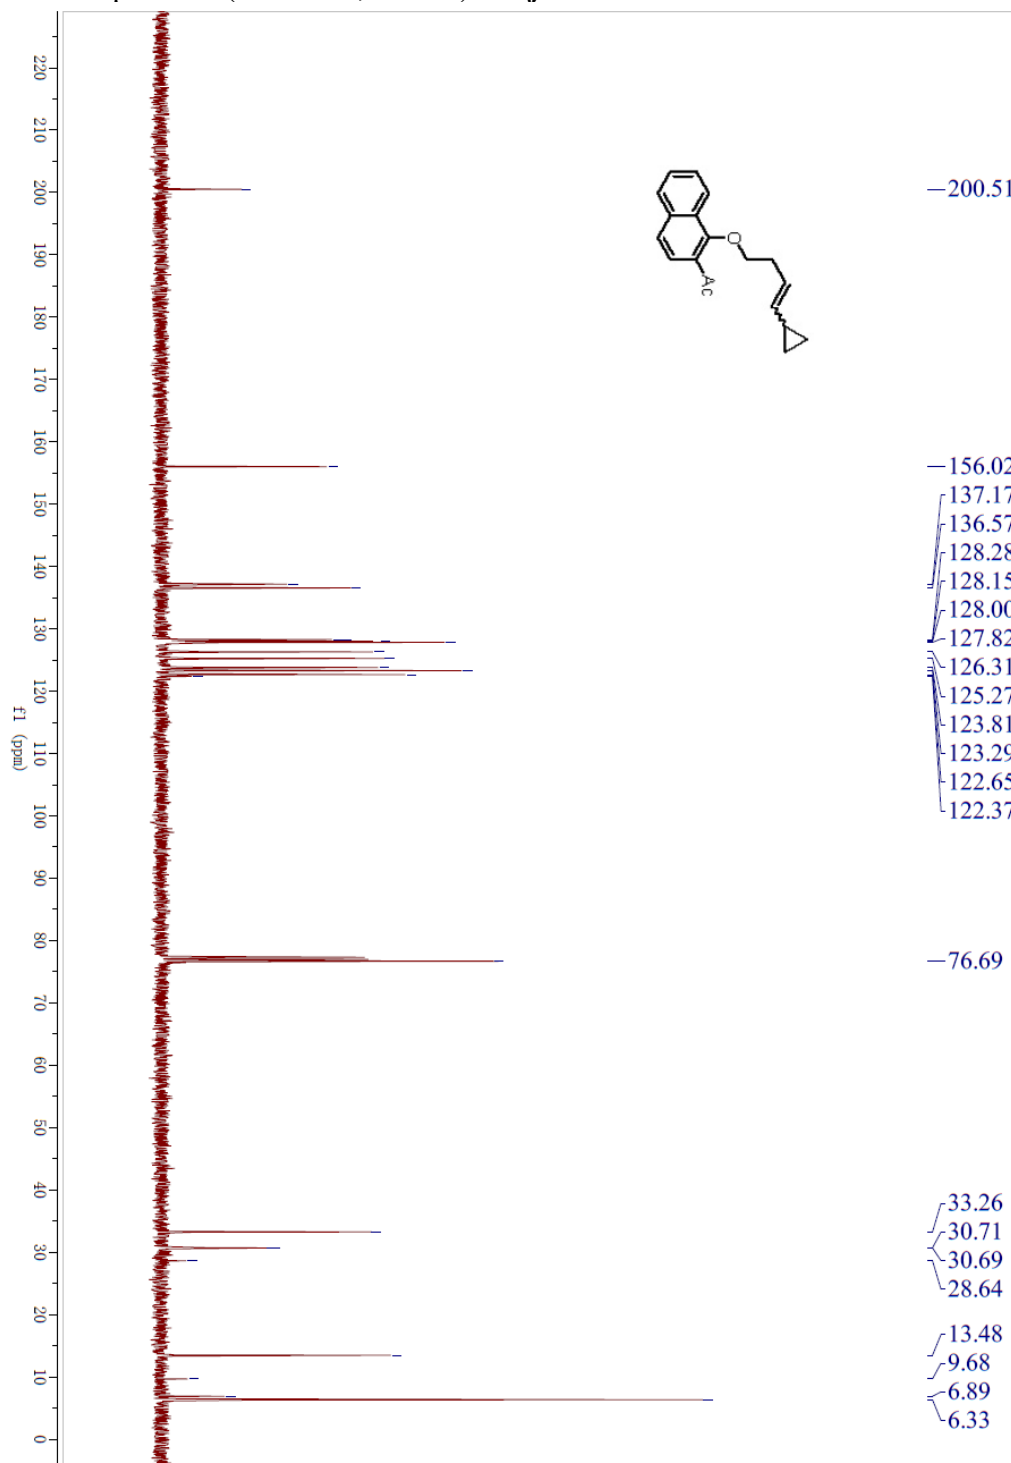

<sup>1</sup>H NMR Spectrum (400 MHz, CDCl<sub>3</sub>) of **1k**

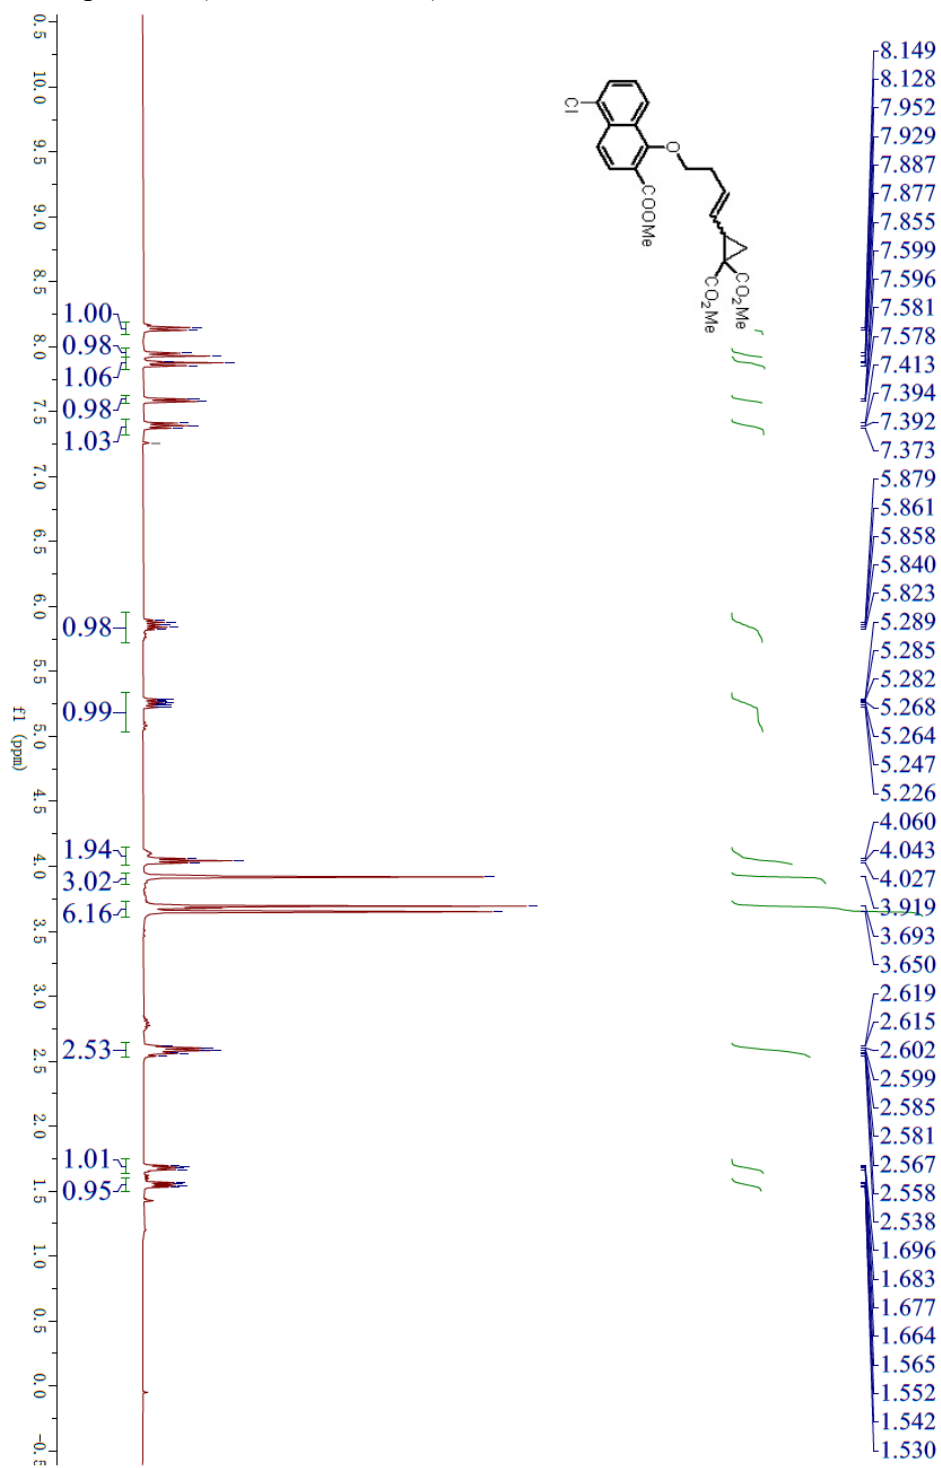

<sup>13</sup>C NMR Spectrum (100 MHz, CDCl<sub>3</sub>) of **1k**

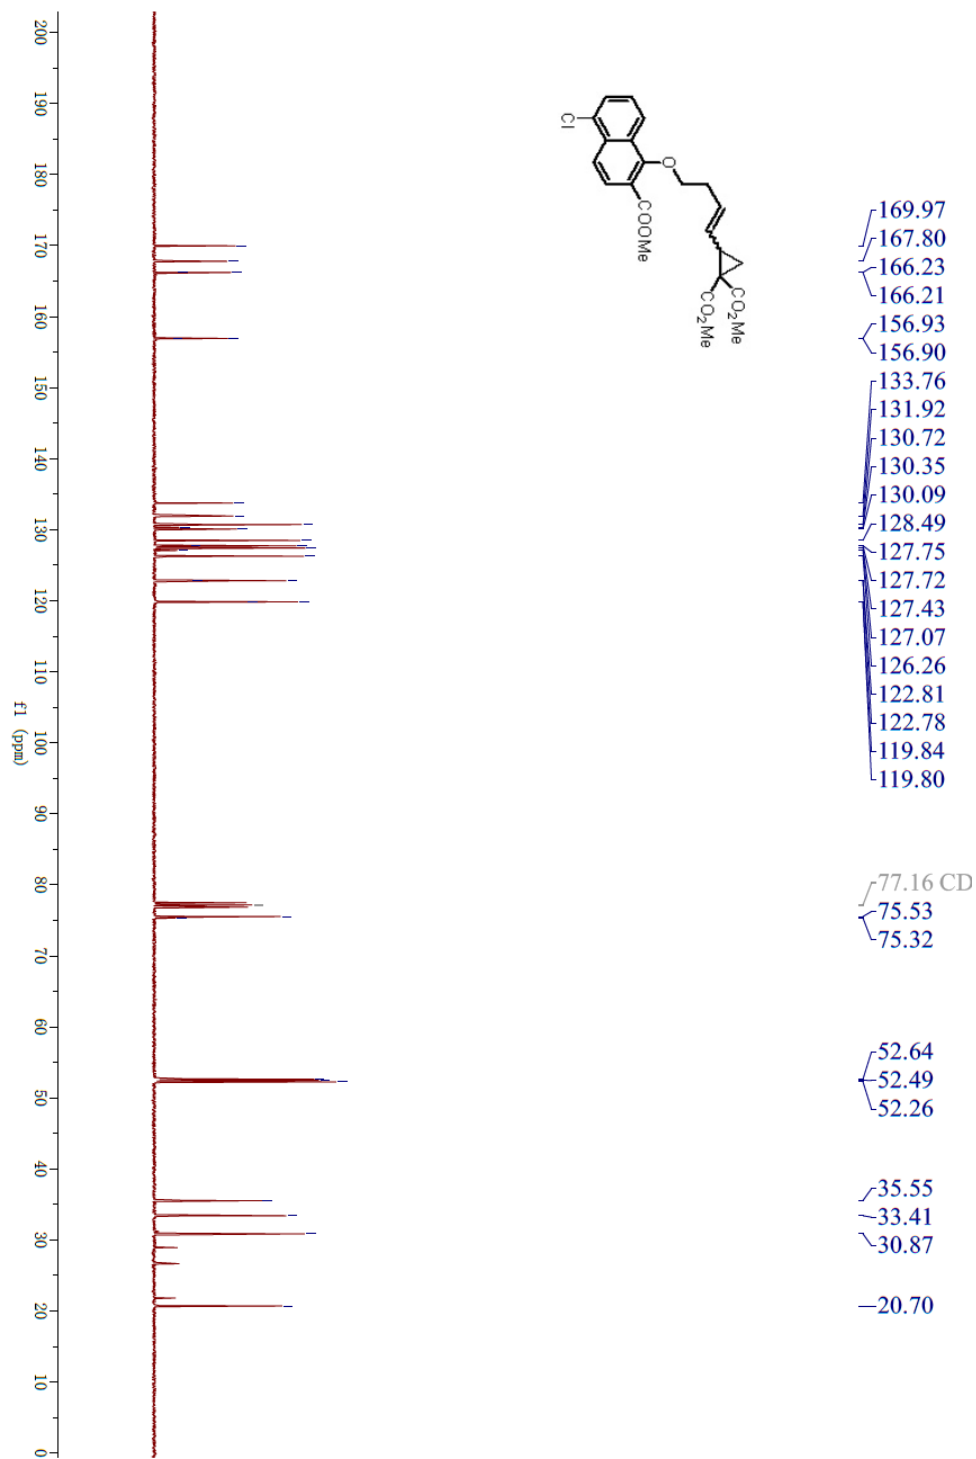

<sup>1</sup>H NMR Spectrum (400 MHz, CDCl<sub>3</sub>) of **11**

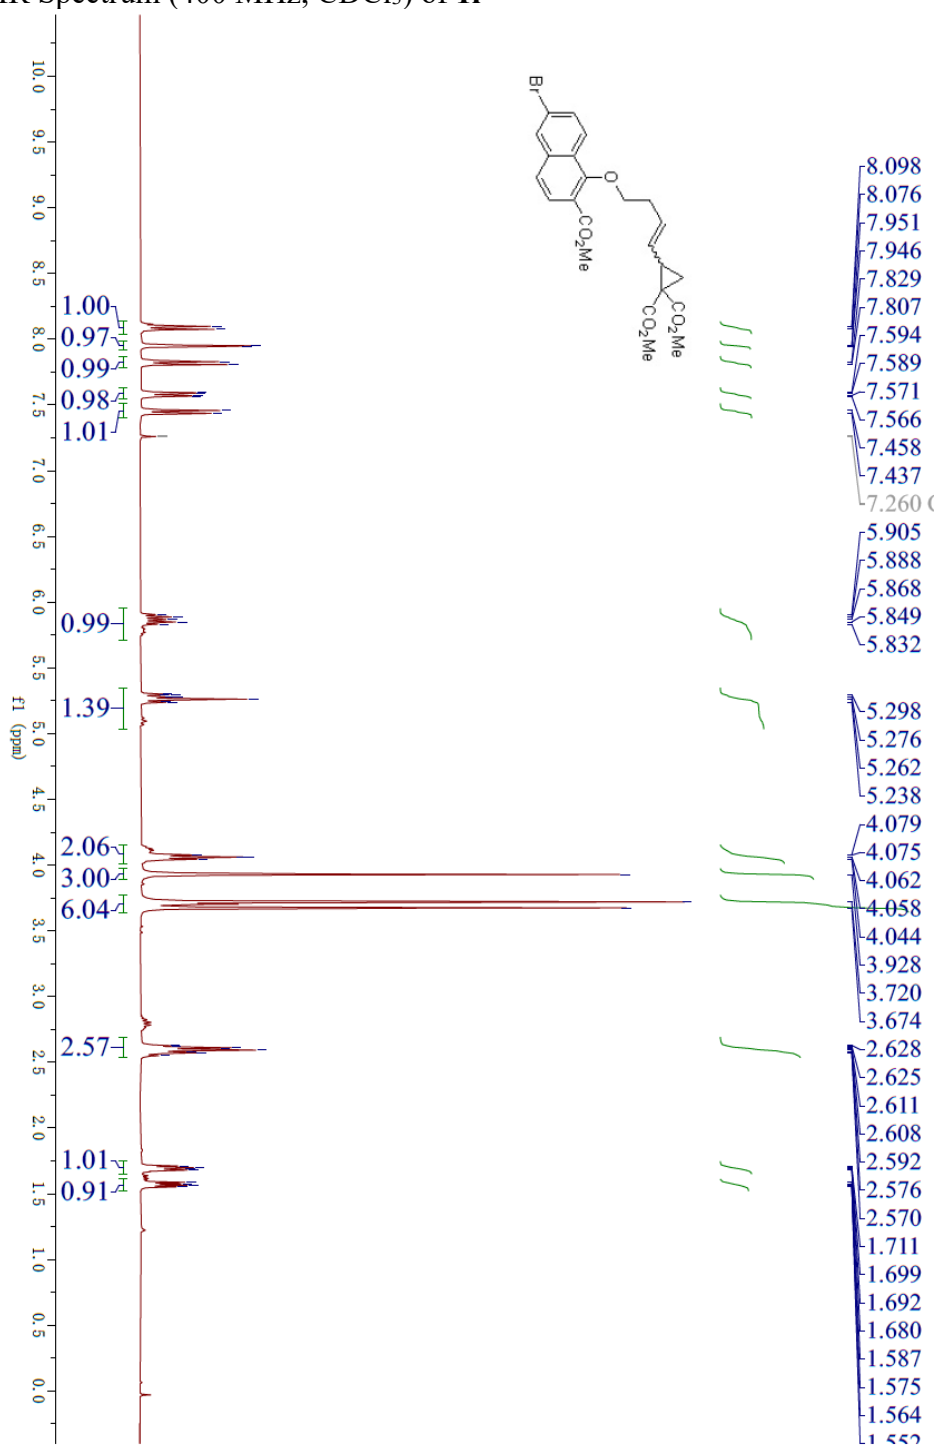

<sup>13</sup>C NMR Spectrum (100 MHz, CDCl<sub>3</sub>) of **11**

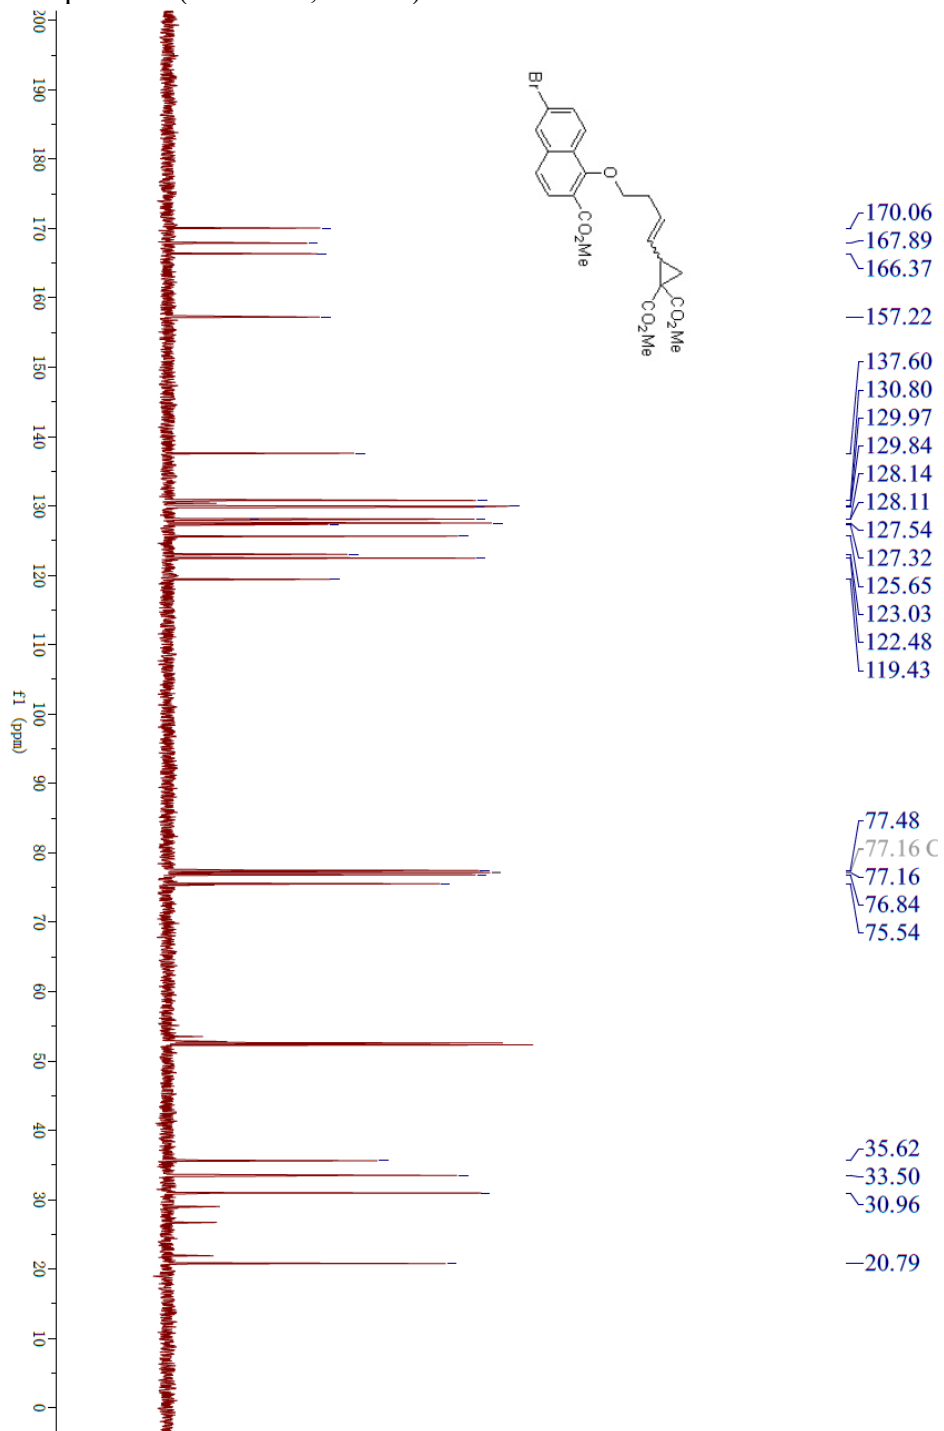



<sup>1</sup>H NMR Spectrum (400 MHz, CDCl<sub>3</sub>) of **1m**

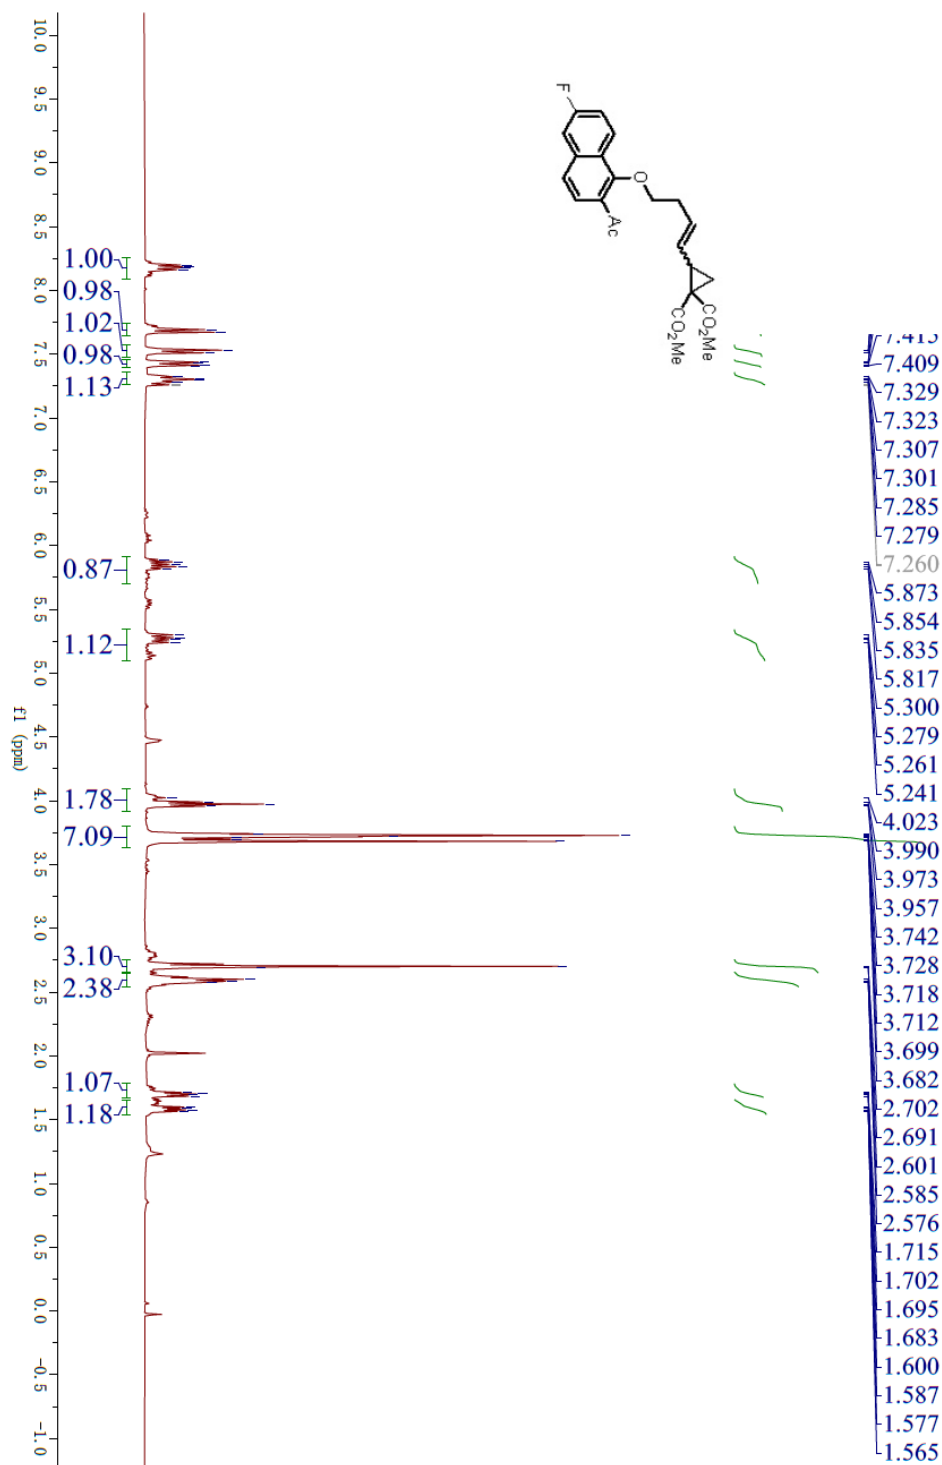

<sup>13</sup>C NMR Spectrum (100 MHz, CDCl<sub>3</sub>) of **1m**

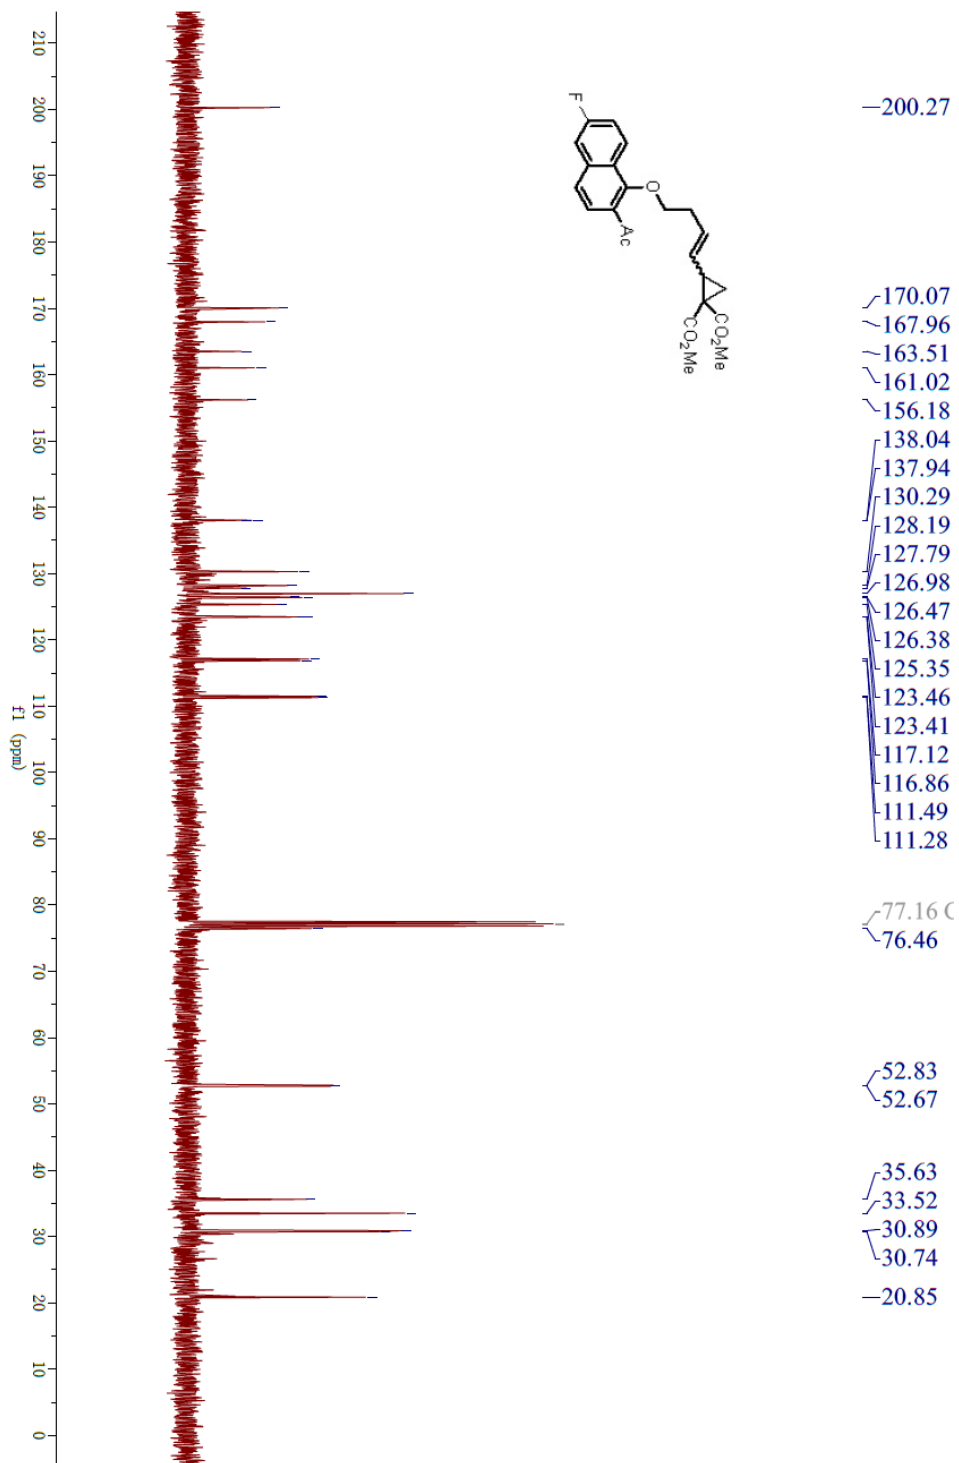

<sup>19</sup>F NMR Spectrum (376 MHz, CDCl<sub>3</sub>) of **1m**

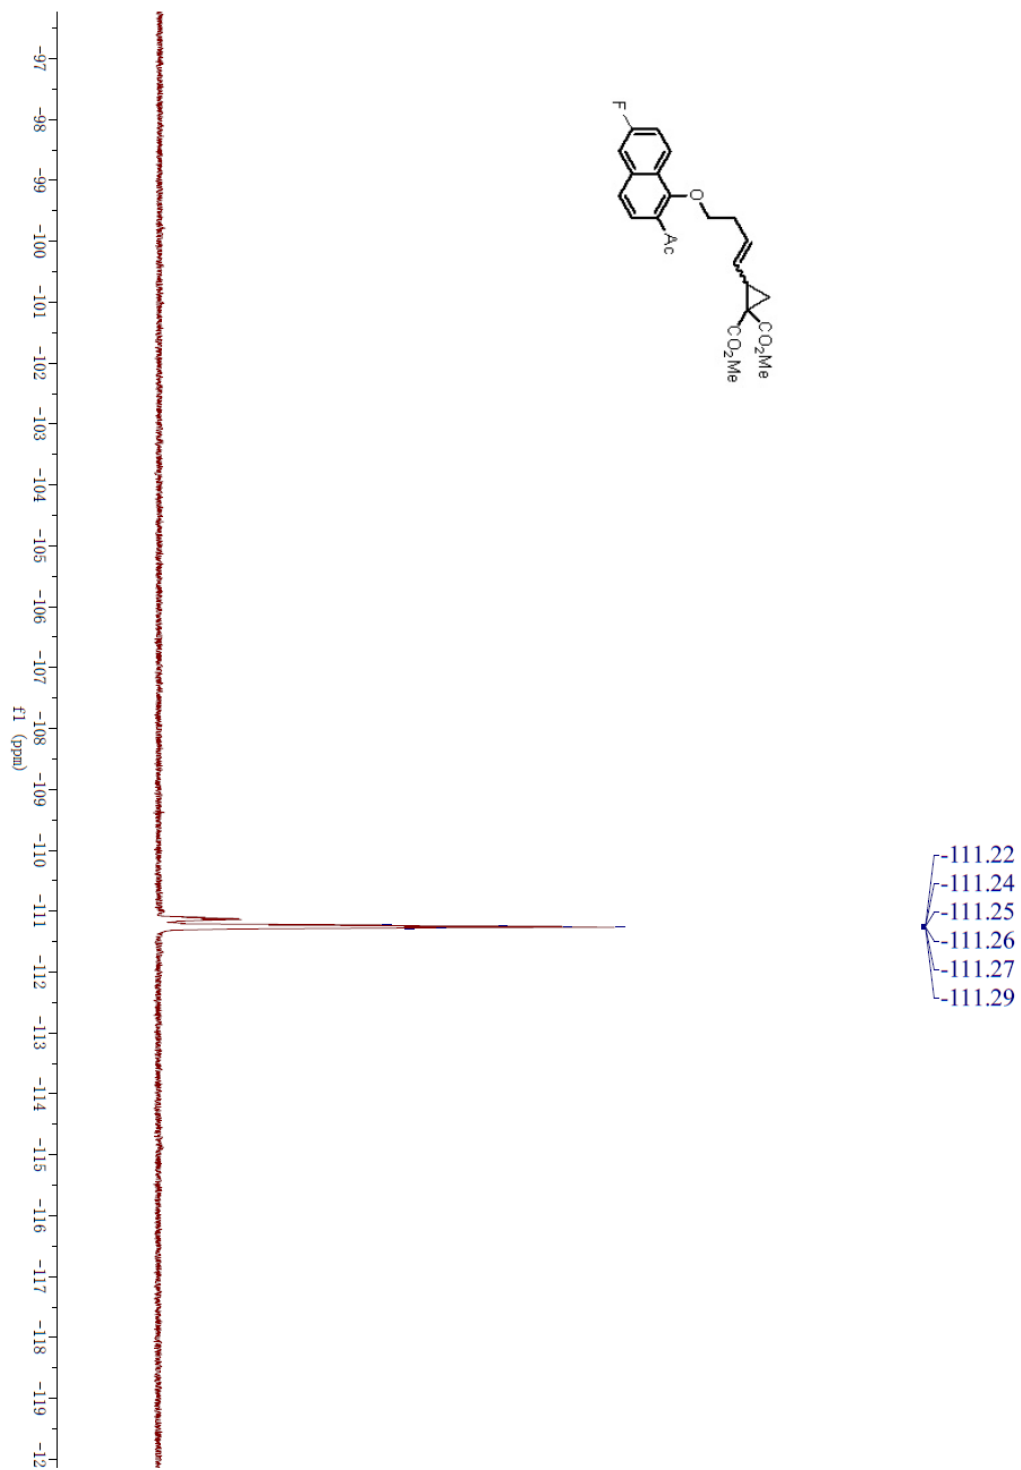

<sup>1</sup>H NMR Spectrum (400 MHz, CDCl<sub>3</sub>) of **1n**

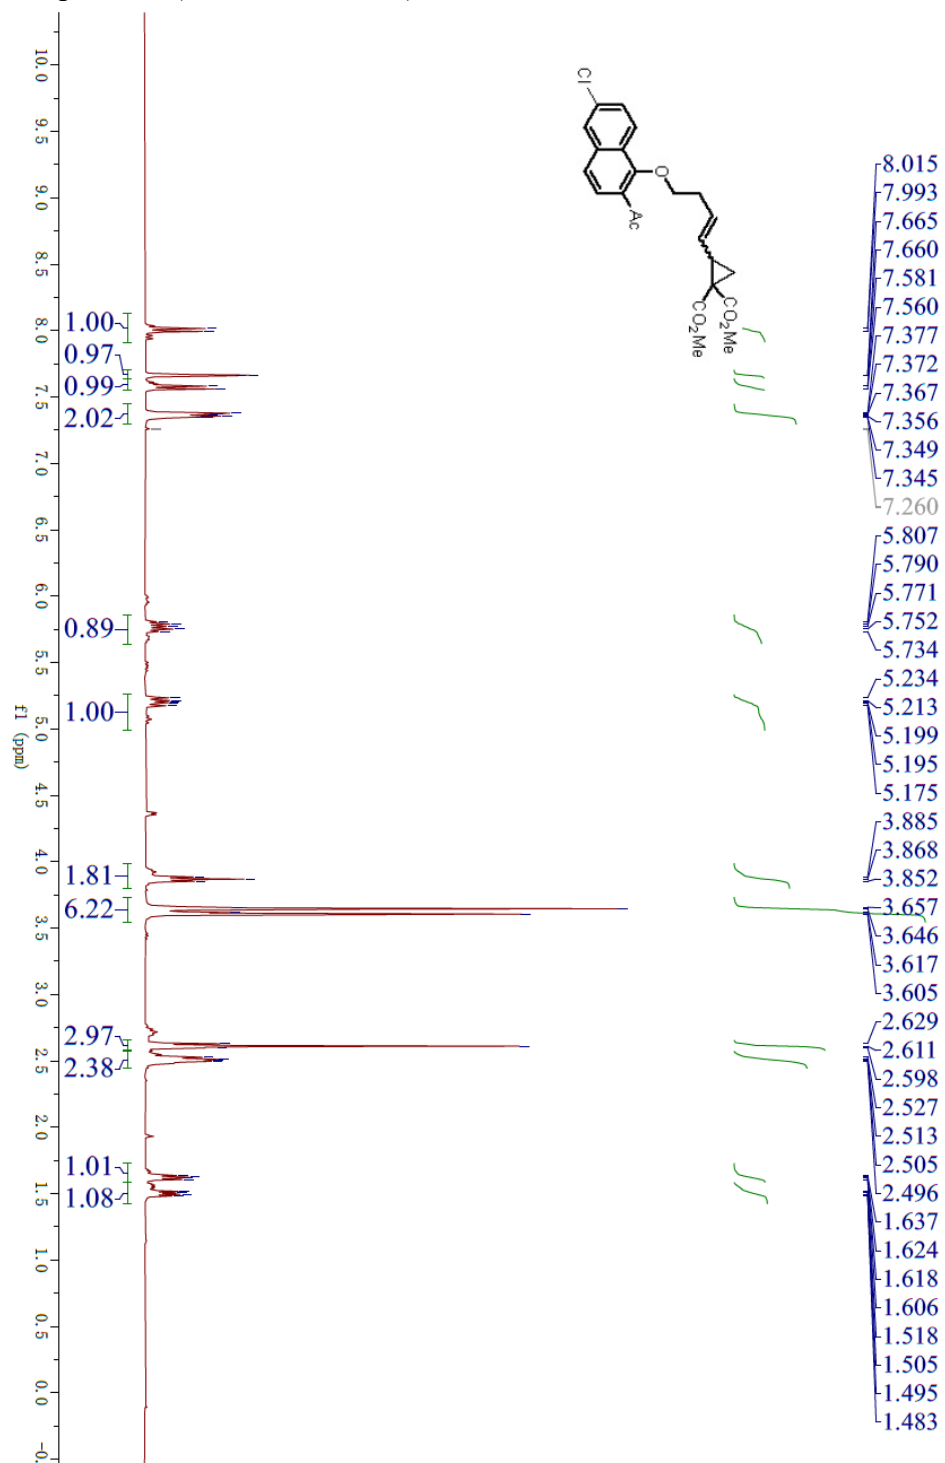

<sup>13</sup>C NMR Spectrum (100 MHz, CDCl<sub>3</sub>) of **1n**

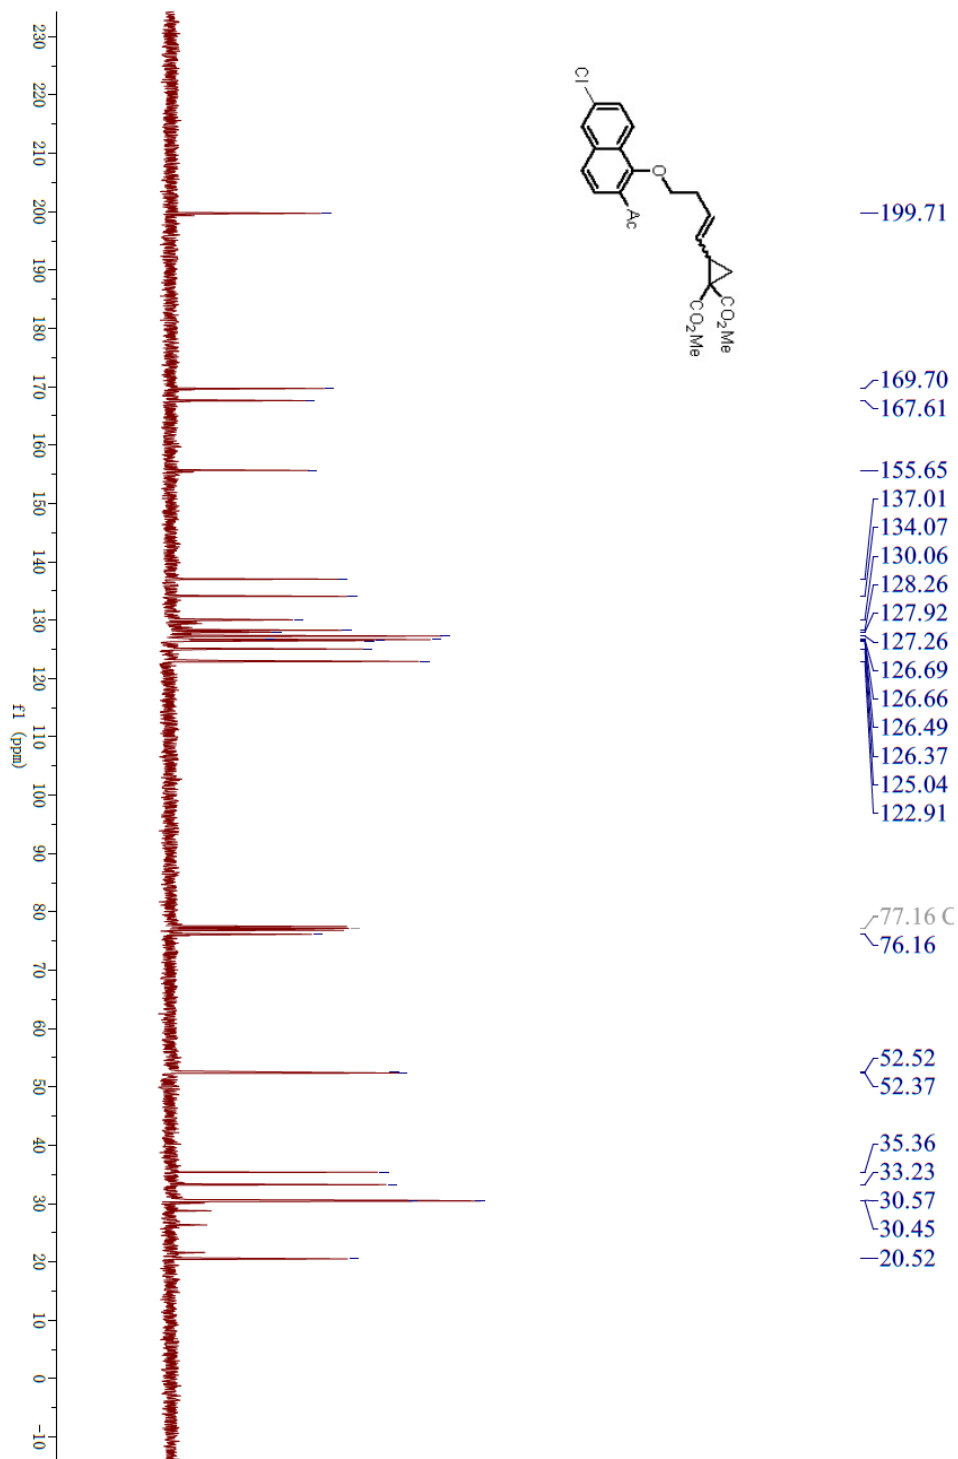

<sup>1</sup>H NMR Spectrum (400 MHz, CDCl<sub>3</sub>) of **10**

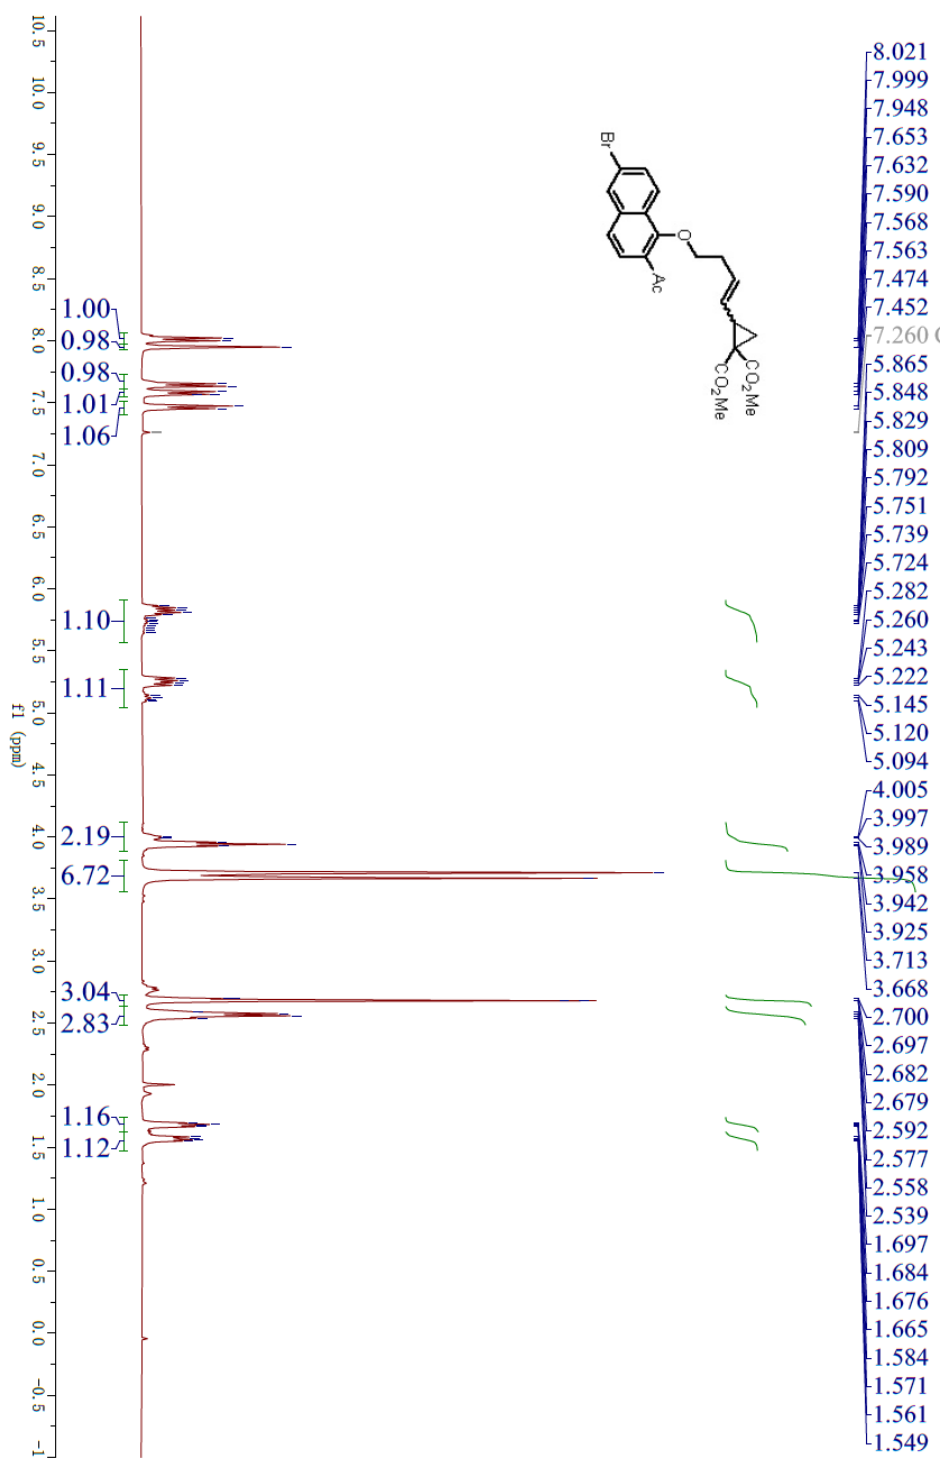

<sup>13</sup>C NMR Spectrum (100 MHz, CDCl<sub>3</sub>) of **10**

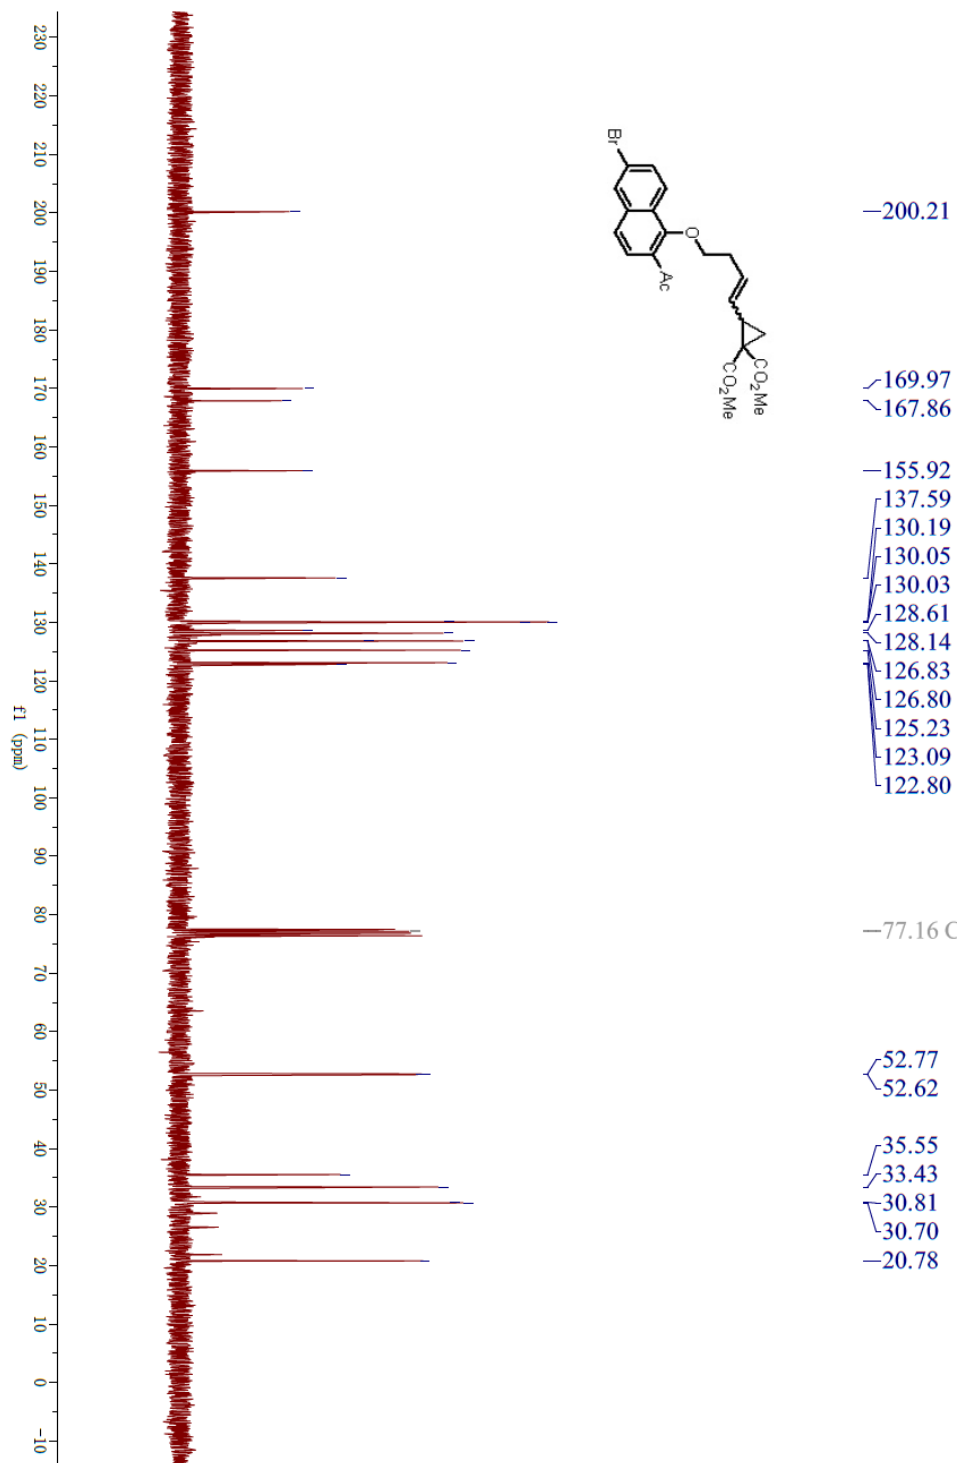

<sup>1</sup>H NMR Spectrum (400 MHz, CDCl<sub>3</sub>) of **1p**

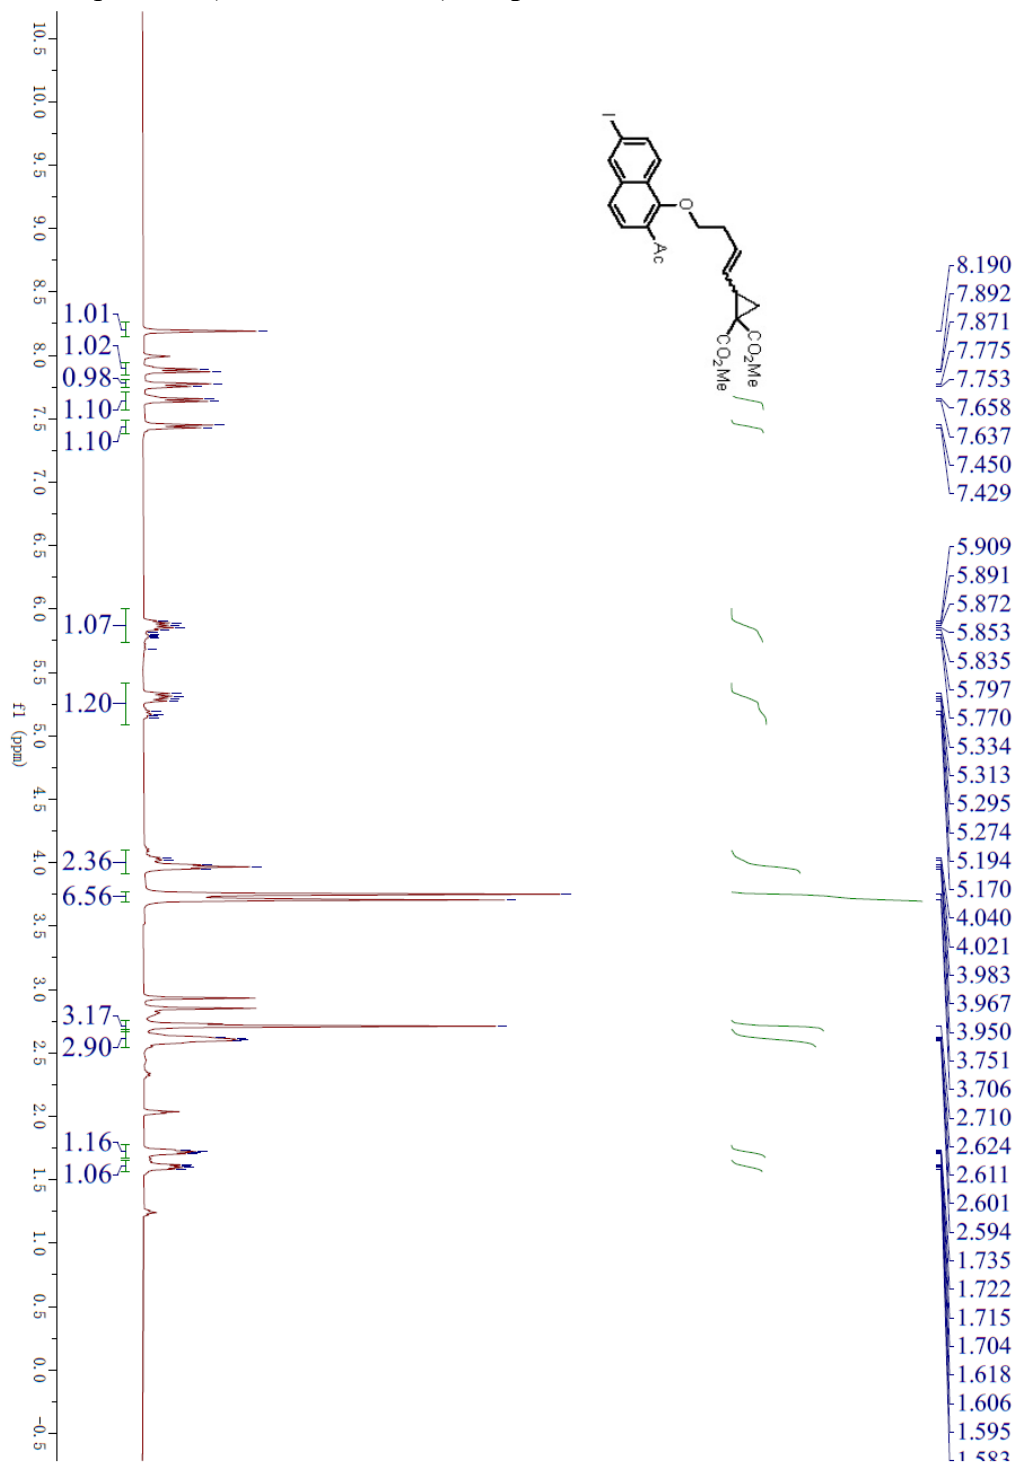



<sup>13</sup>C NMR Spectrum (100 MHz, CDCl<sub>3</sub>) of **1p**

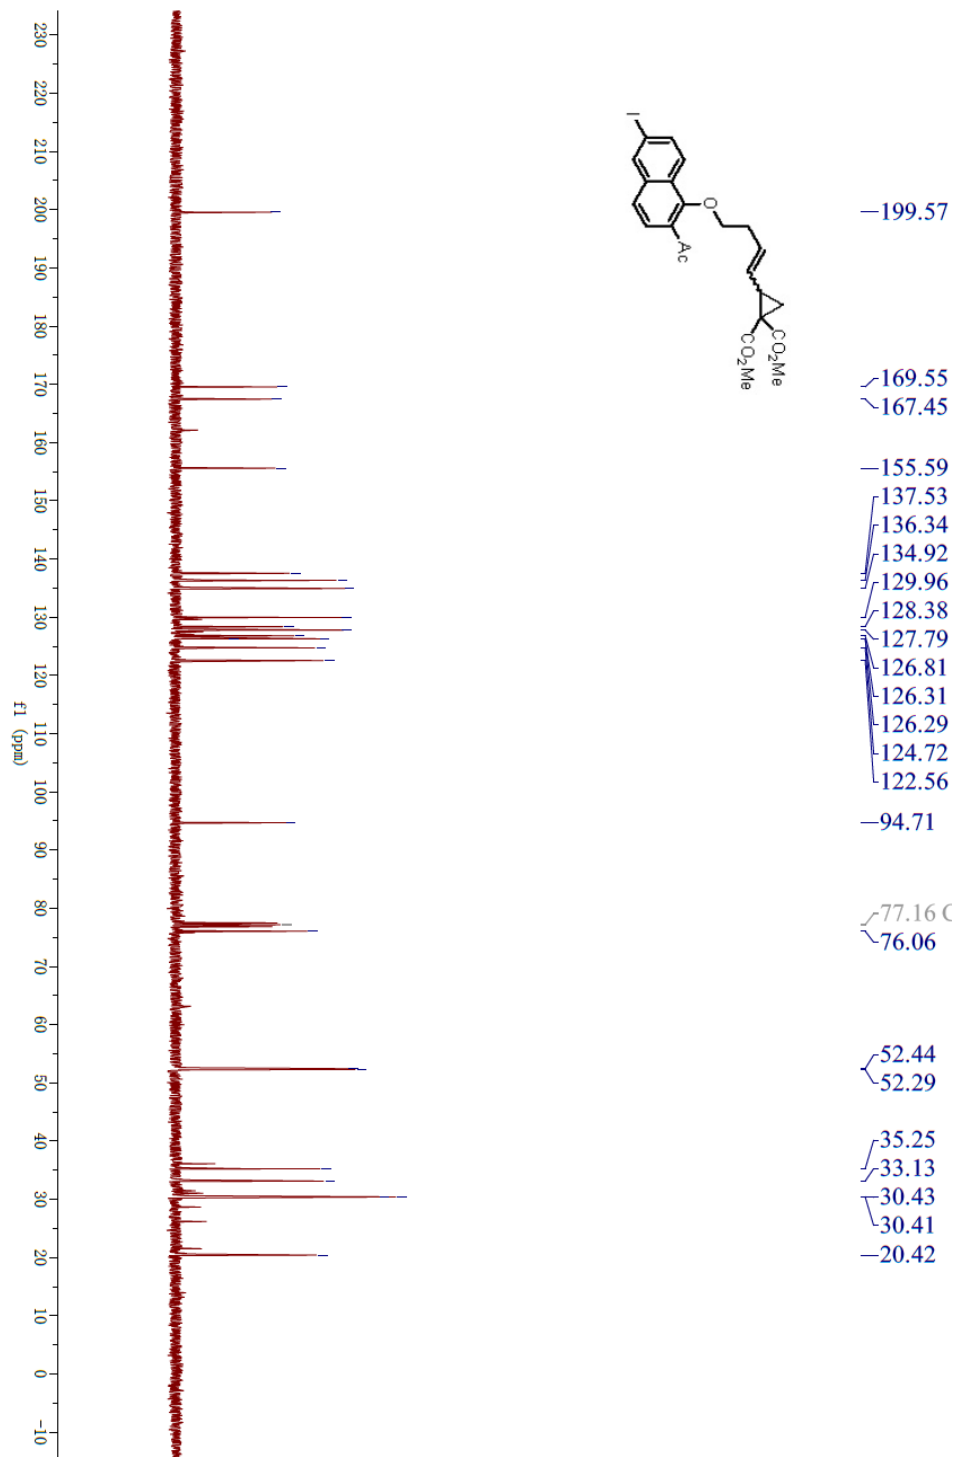

<sup>1</sup>H NMR Spectrum (400 MHz, CDCl<sub>3</sub>) of **1q**

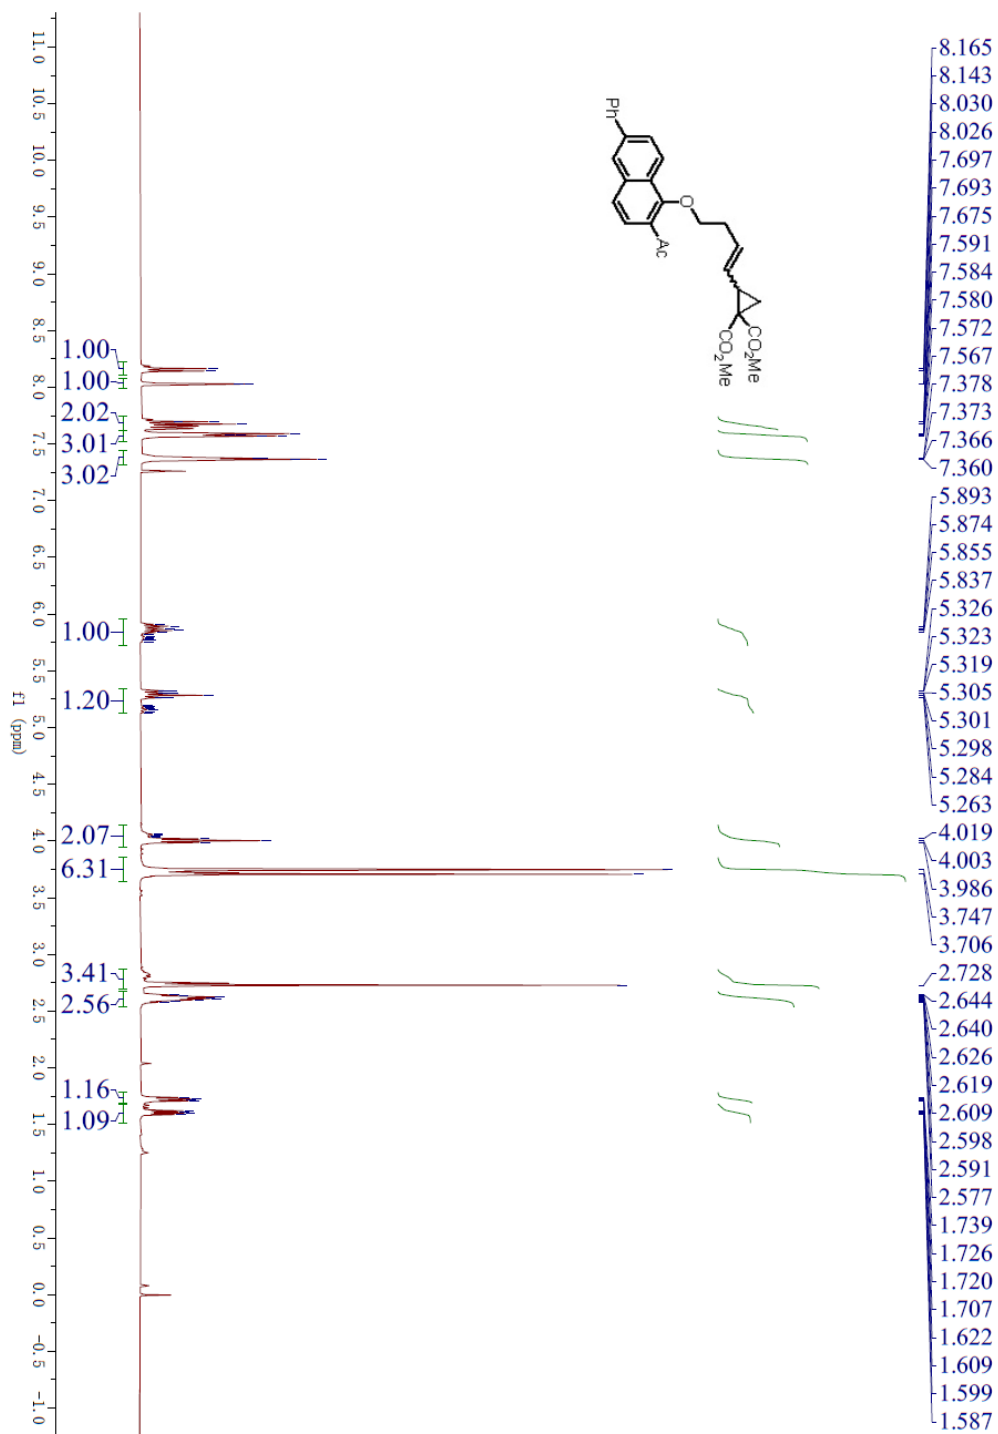

<sup>13</sup>C NMR Spectrum (100 MHz, CDCl<sub>3</sub>) of **1q**

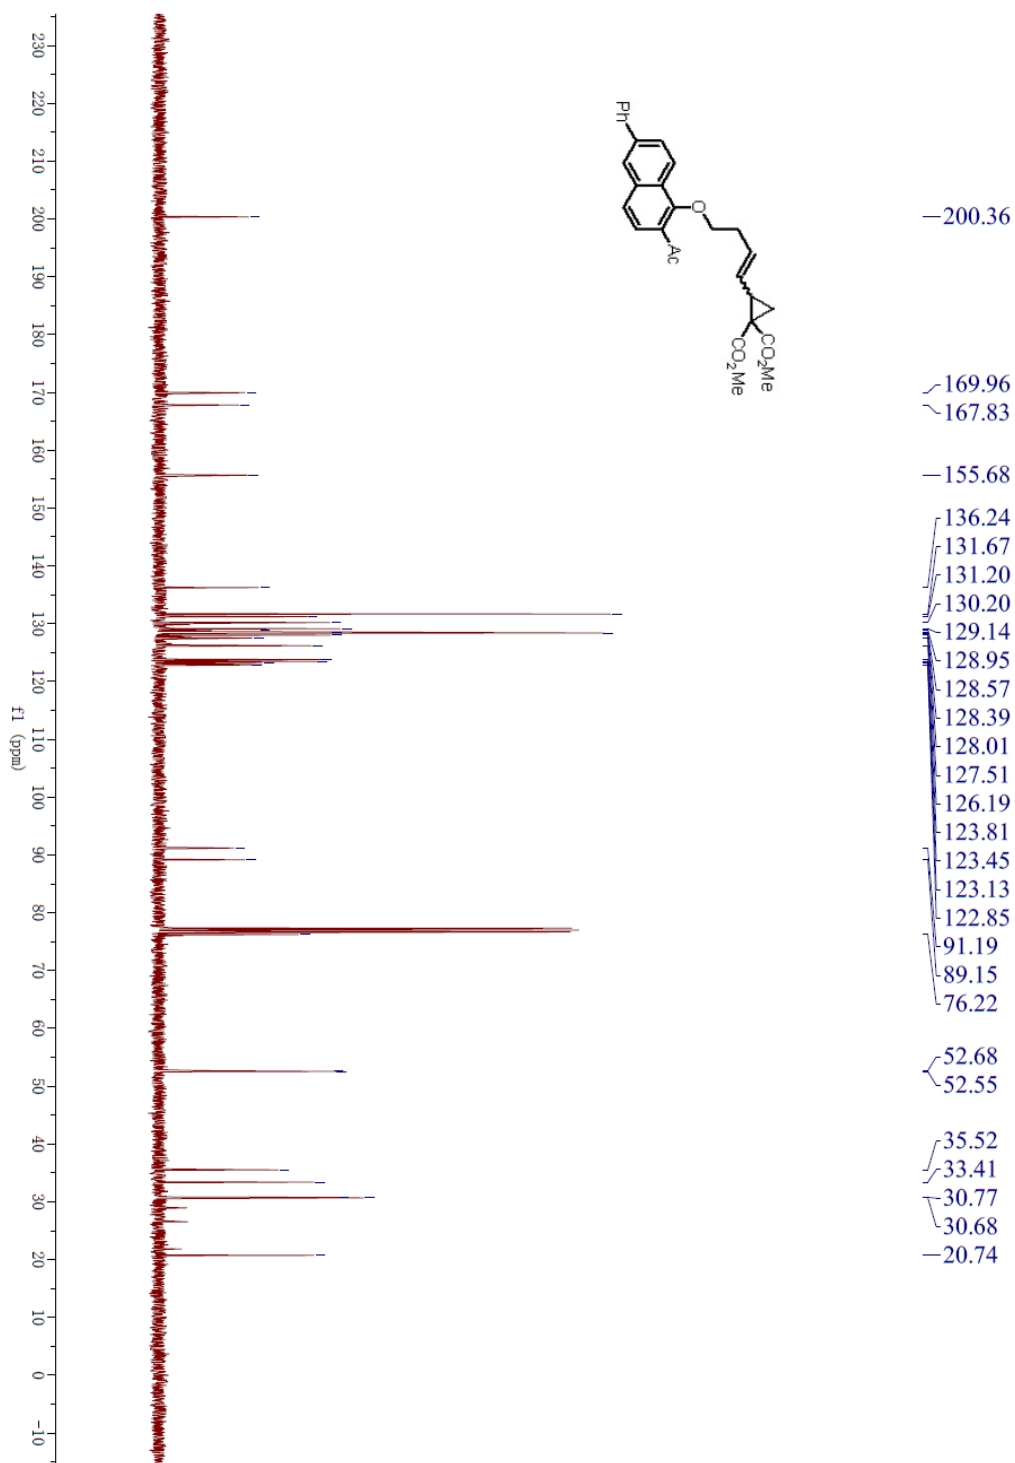

<sup>1</sup>H NMR Spectrum (400 MHz, CDCl<sub>3</sub>) of **1r**

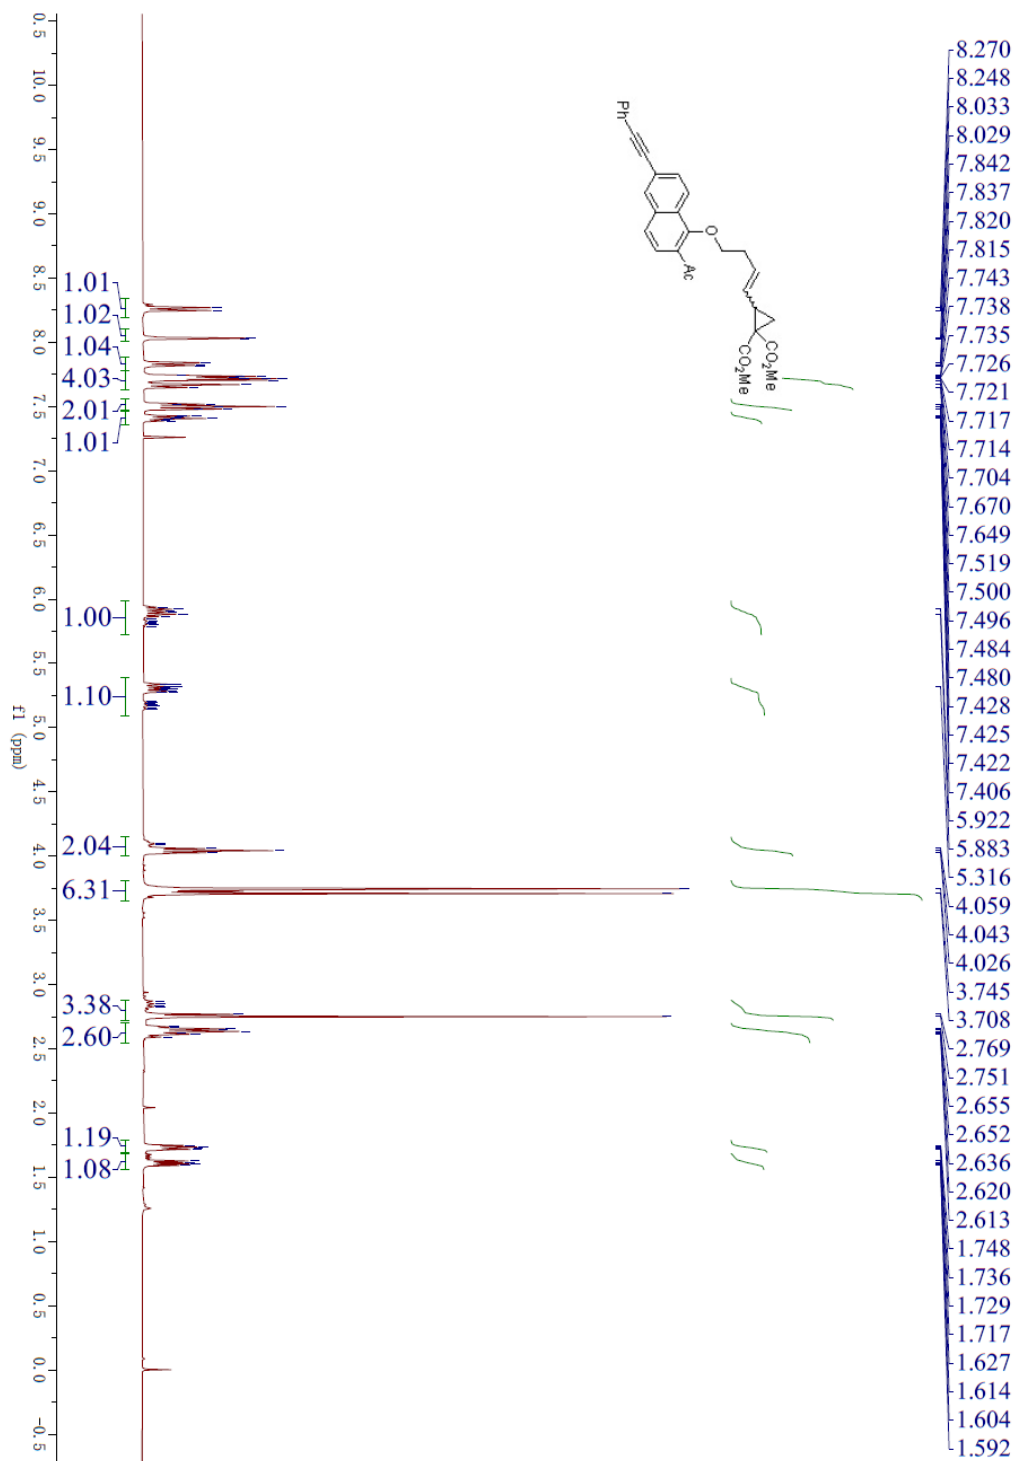

<sup>13</sup>C NMR Spectrum (100 MHz, CDCl<sub>3</sub>) of **1r**

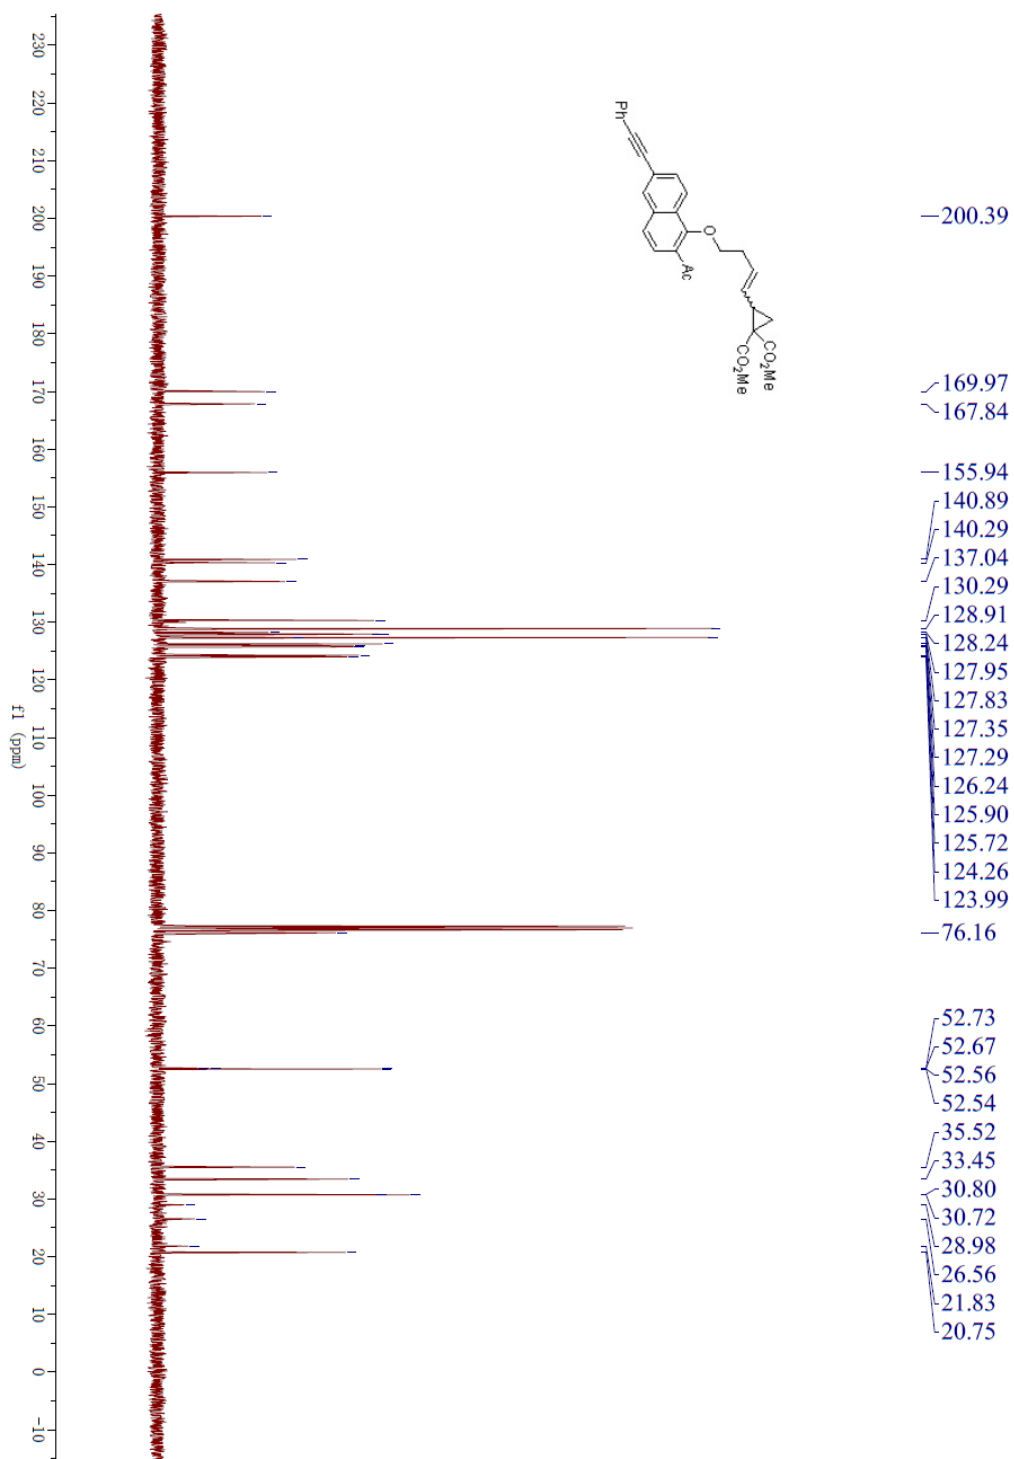

<sup>1</sup>H NMR Spectrum (400 MHz, CDCl<sub>3</sub>) of **1s**

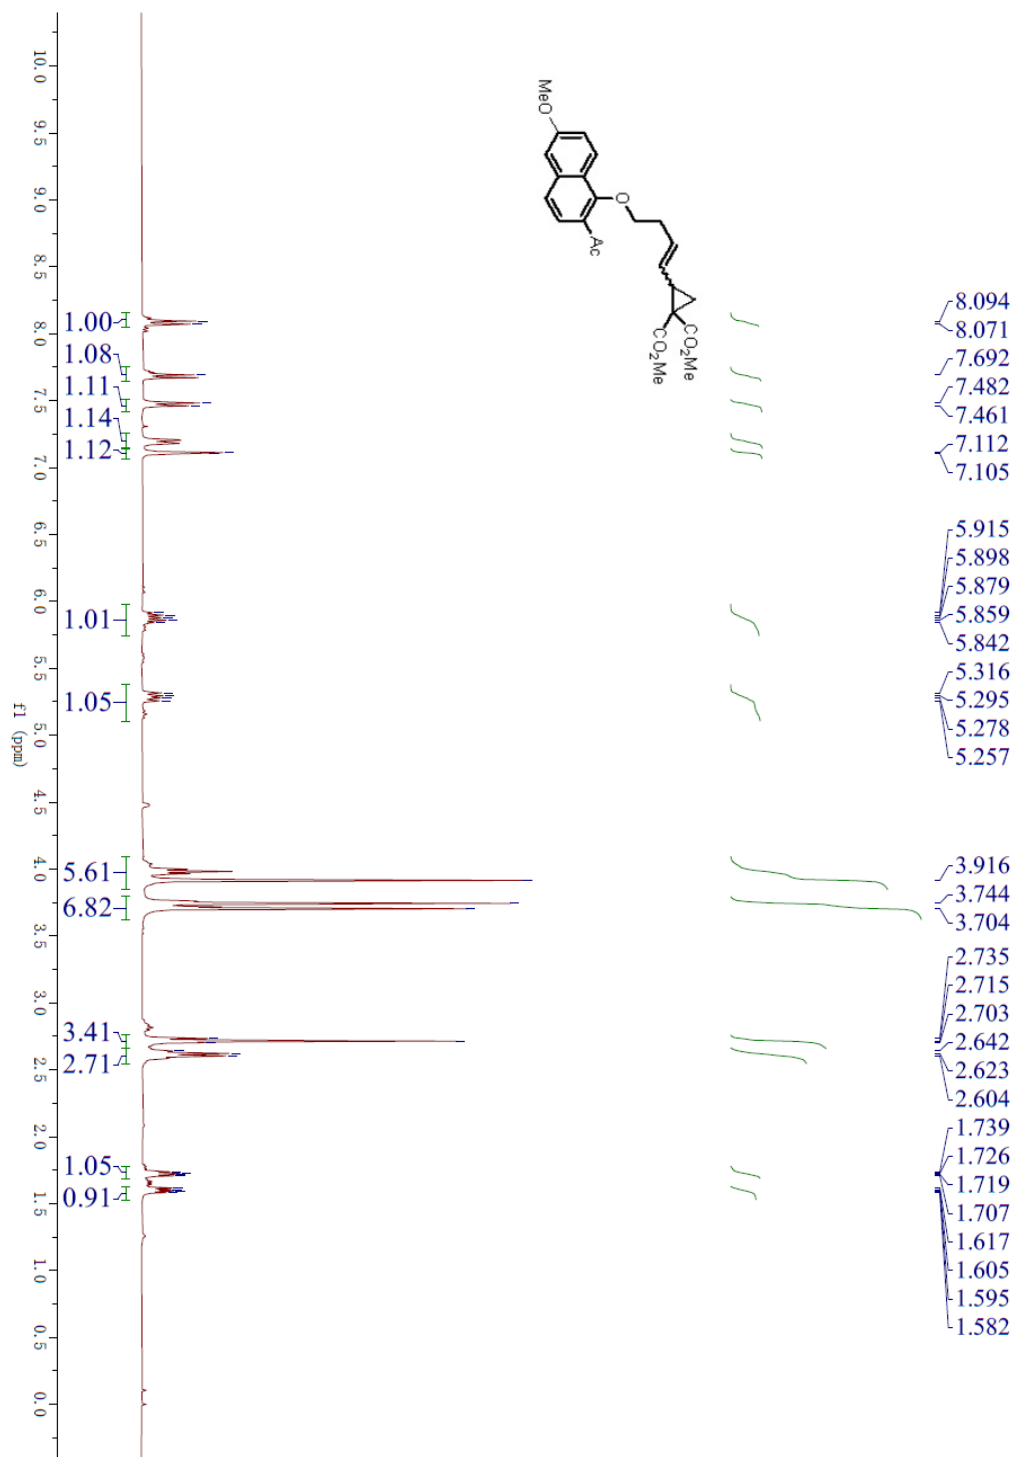

<sup>13</sup>C NMR Spectrum (100 MHz, CDCl<sub>3</sub>) of **1s**

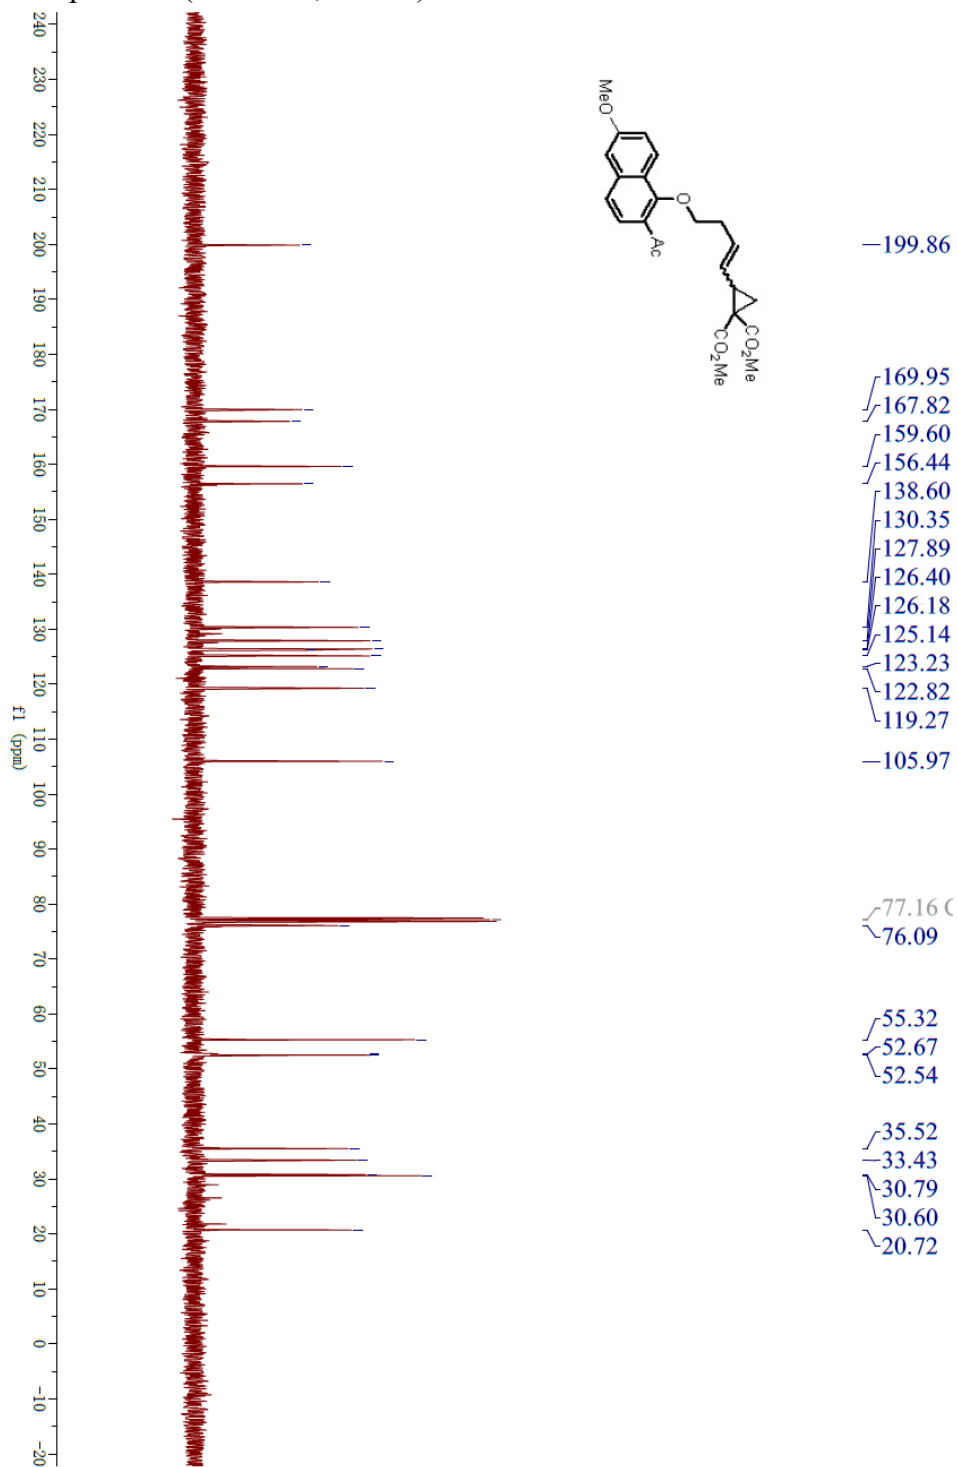

<sup>1</sup>H NMR Spectrum (400 MHz, CDCl<sub>3</sub>) of **1t**

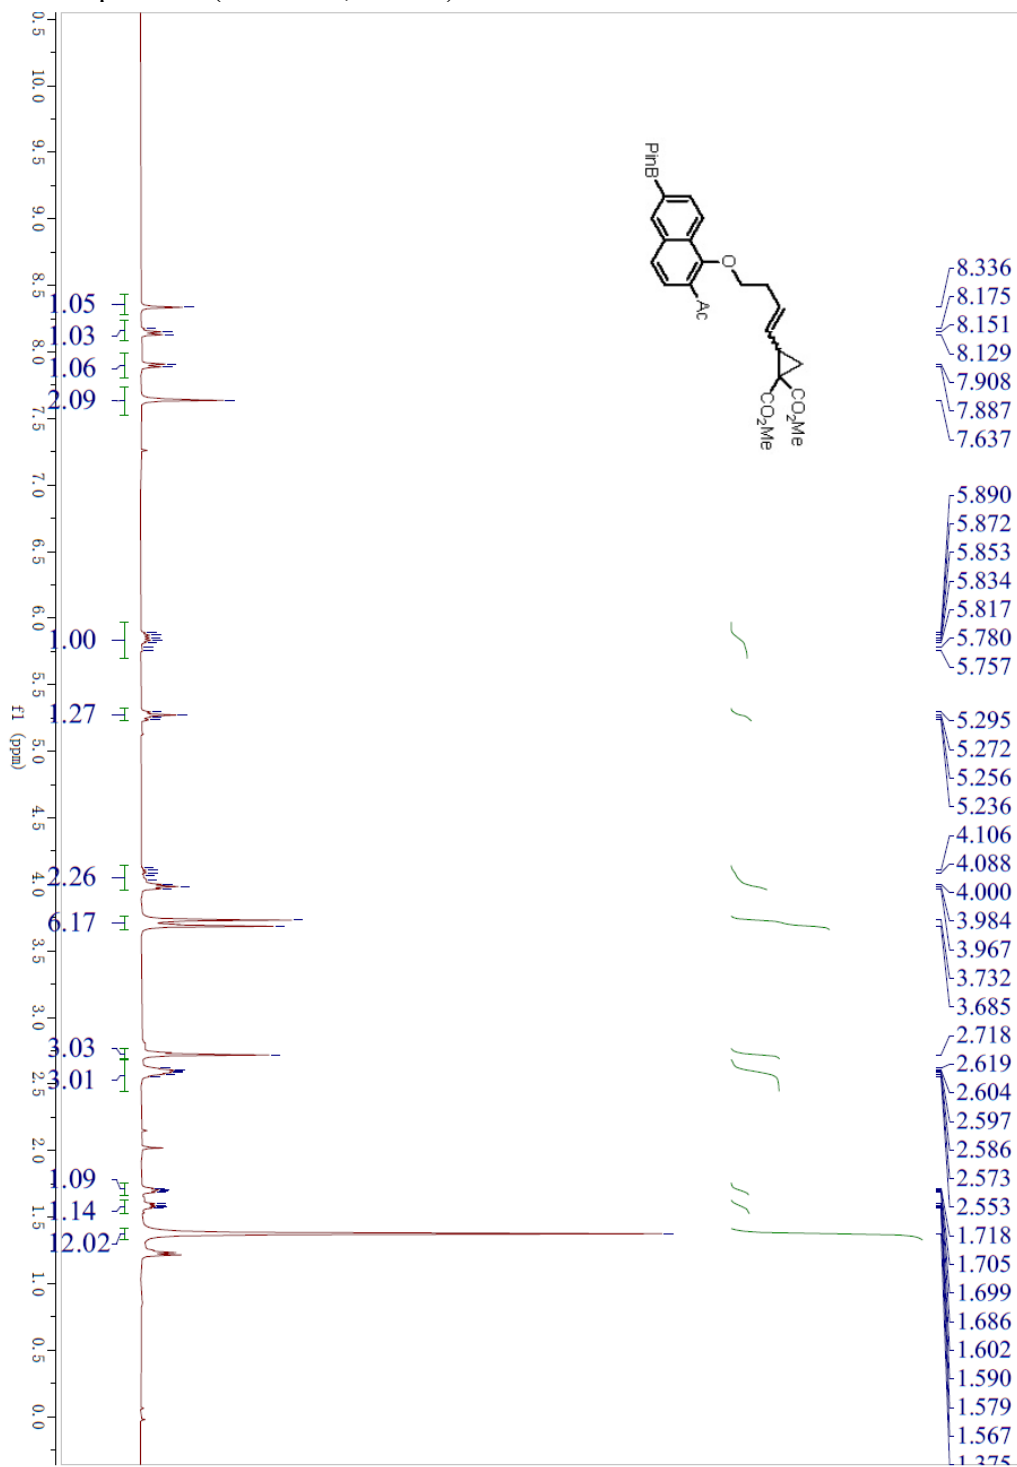



<sup>13</sup>C NMR Spectrum (100 MHz, CDCl<sub>3</sub>) of **1t**

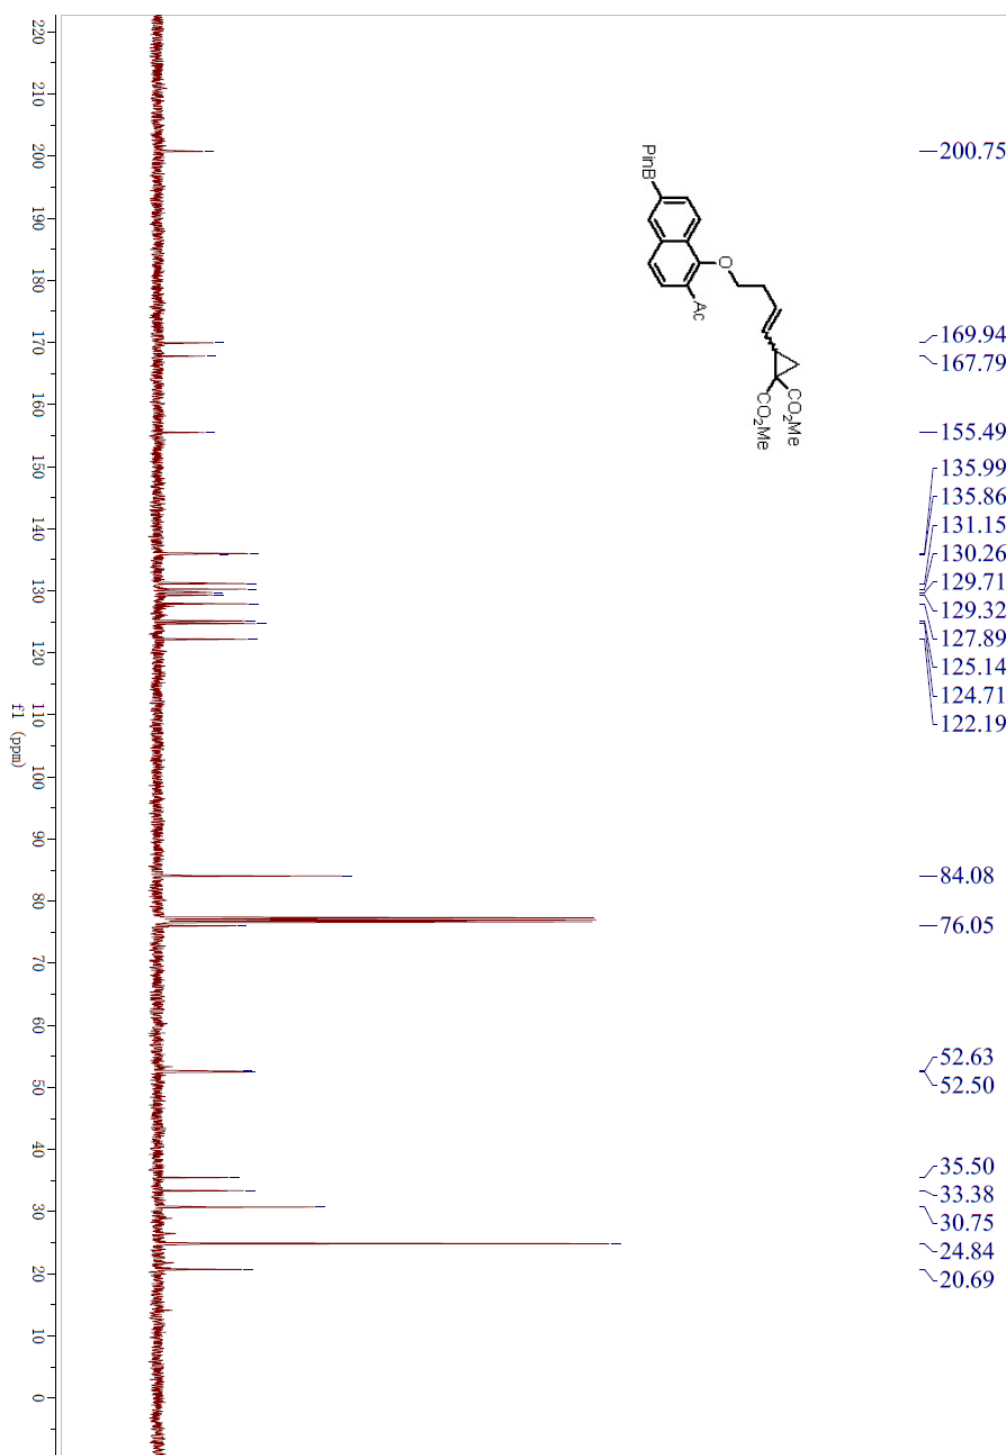

<sup>1</sup>H NMR Spectrum (400 MHz, CDCl<sub>3</sub>) of **9a**

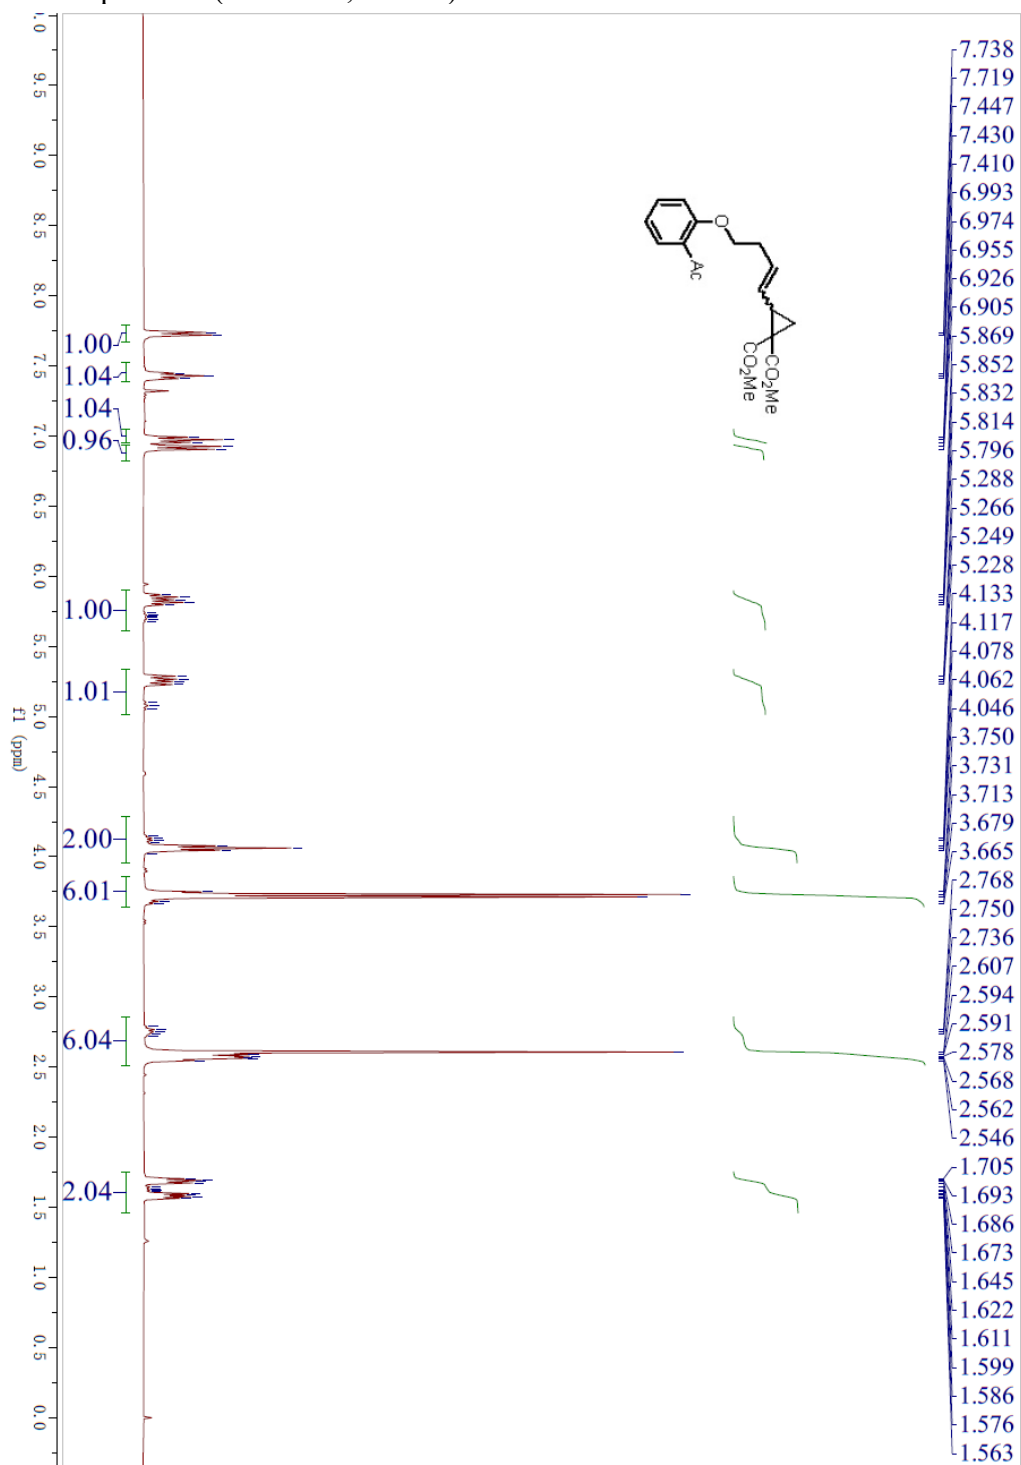

$^{13}\text{C}$  NMR Spectrum (100 MHz,  $\text{CDCl}_3$ ) of **9a**

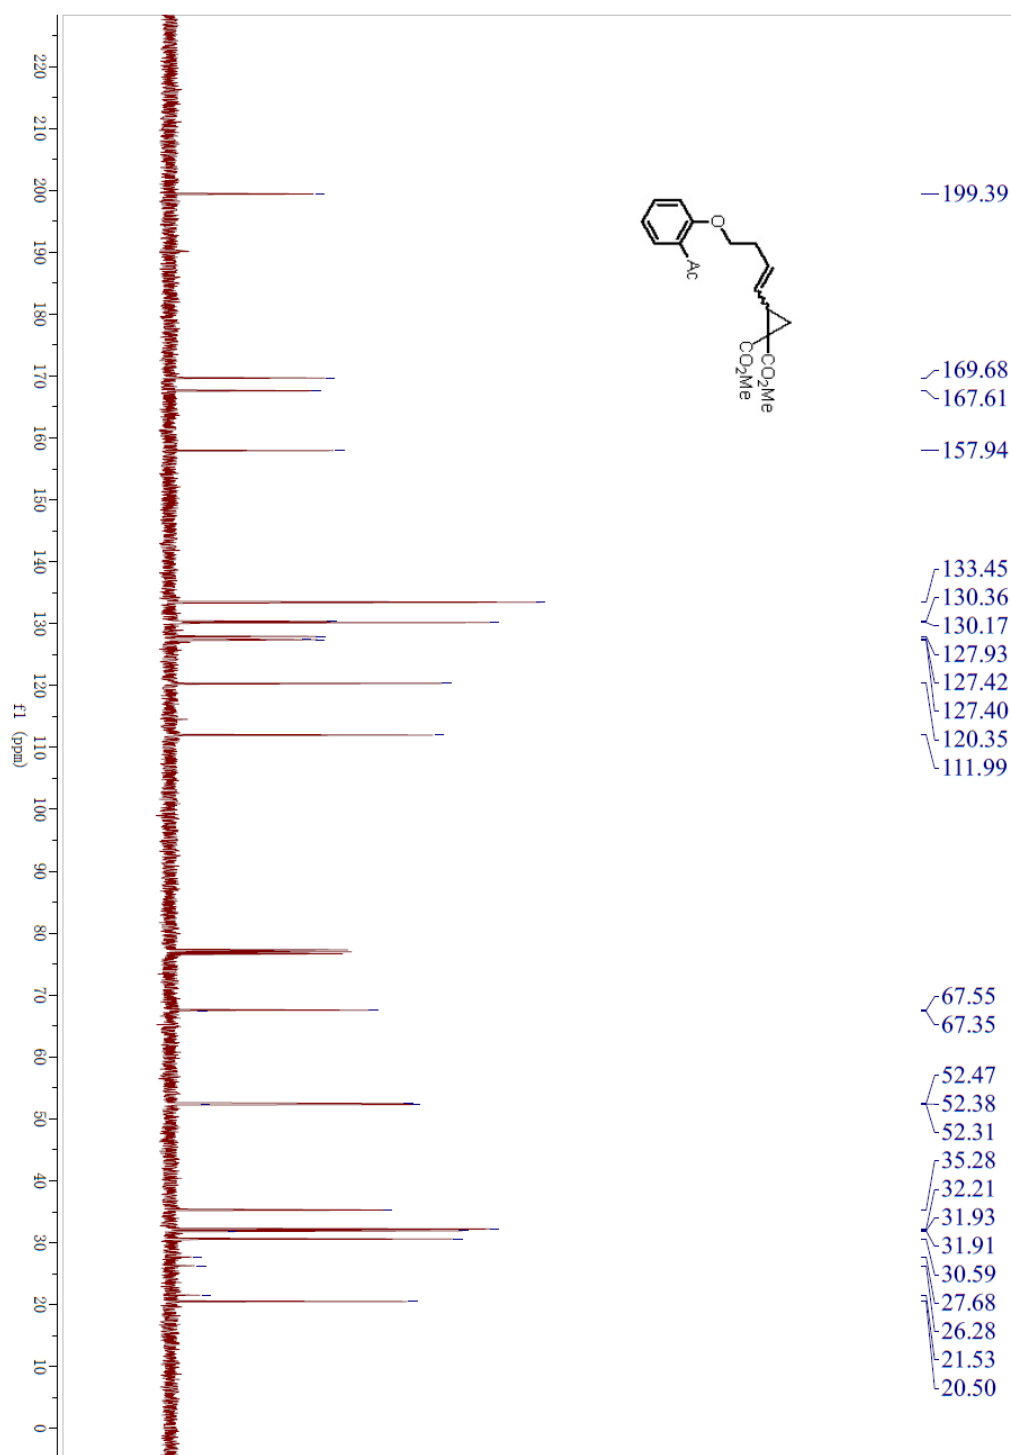

<sup>1</sup>H NMR Spectrum (400 MHz, CDCl<sub>3</sub>) of **9b**

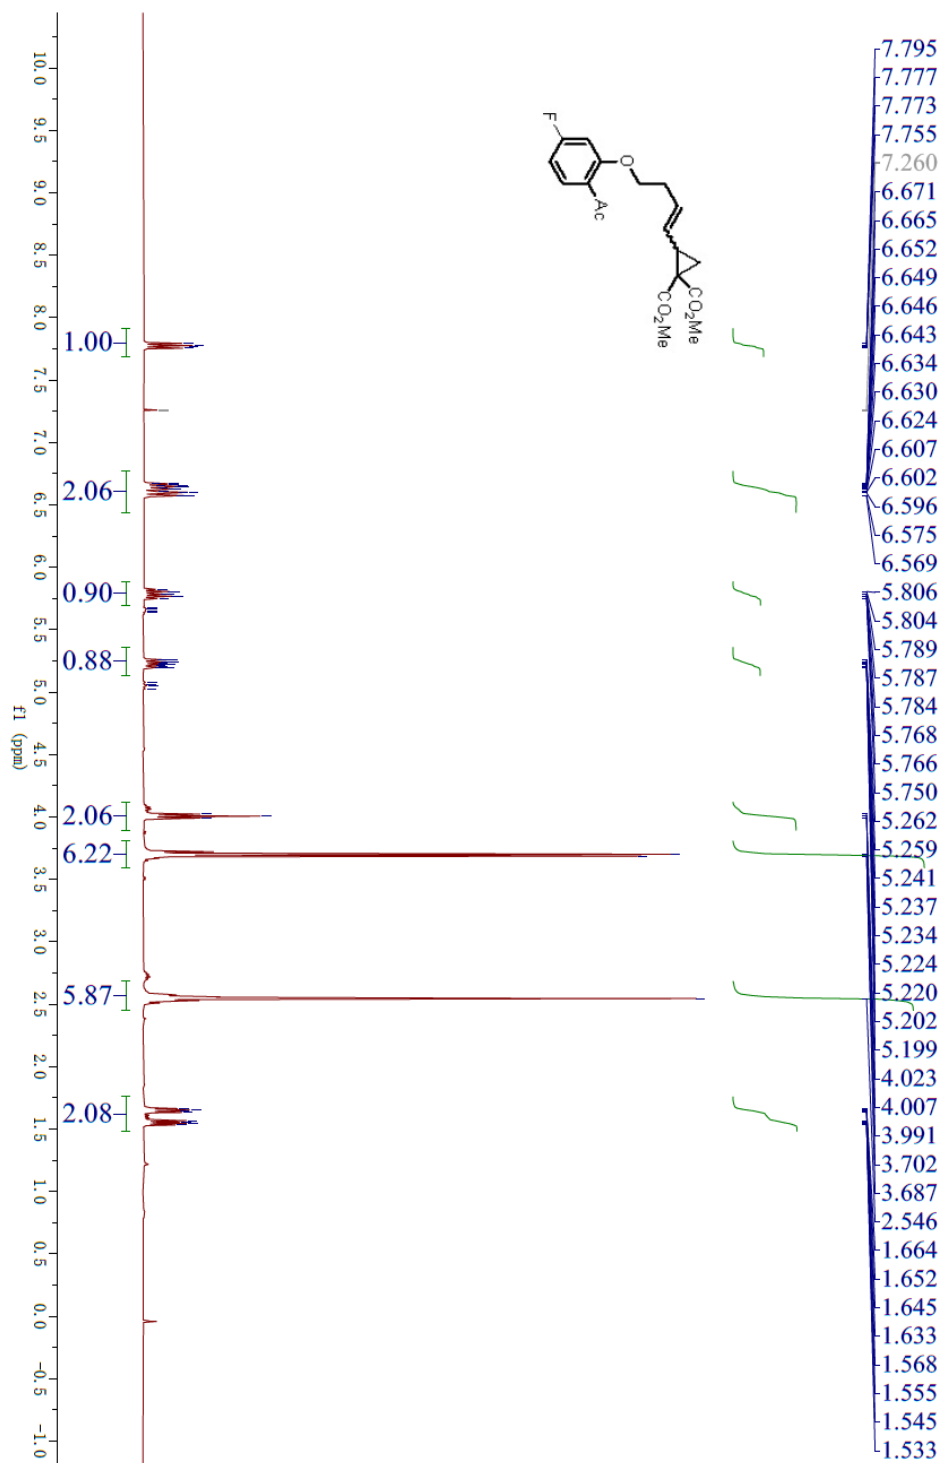

<sup>13</sup>C NMR Spectrum (100 MHz, CDCl<sub>3</sub>) of **9b**

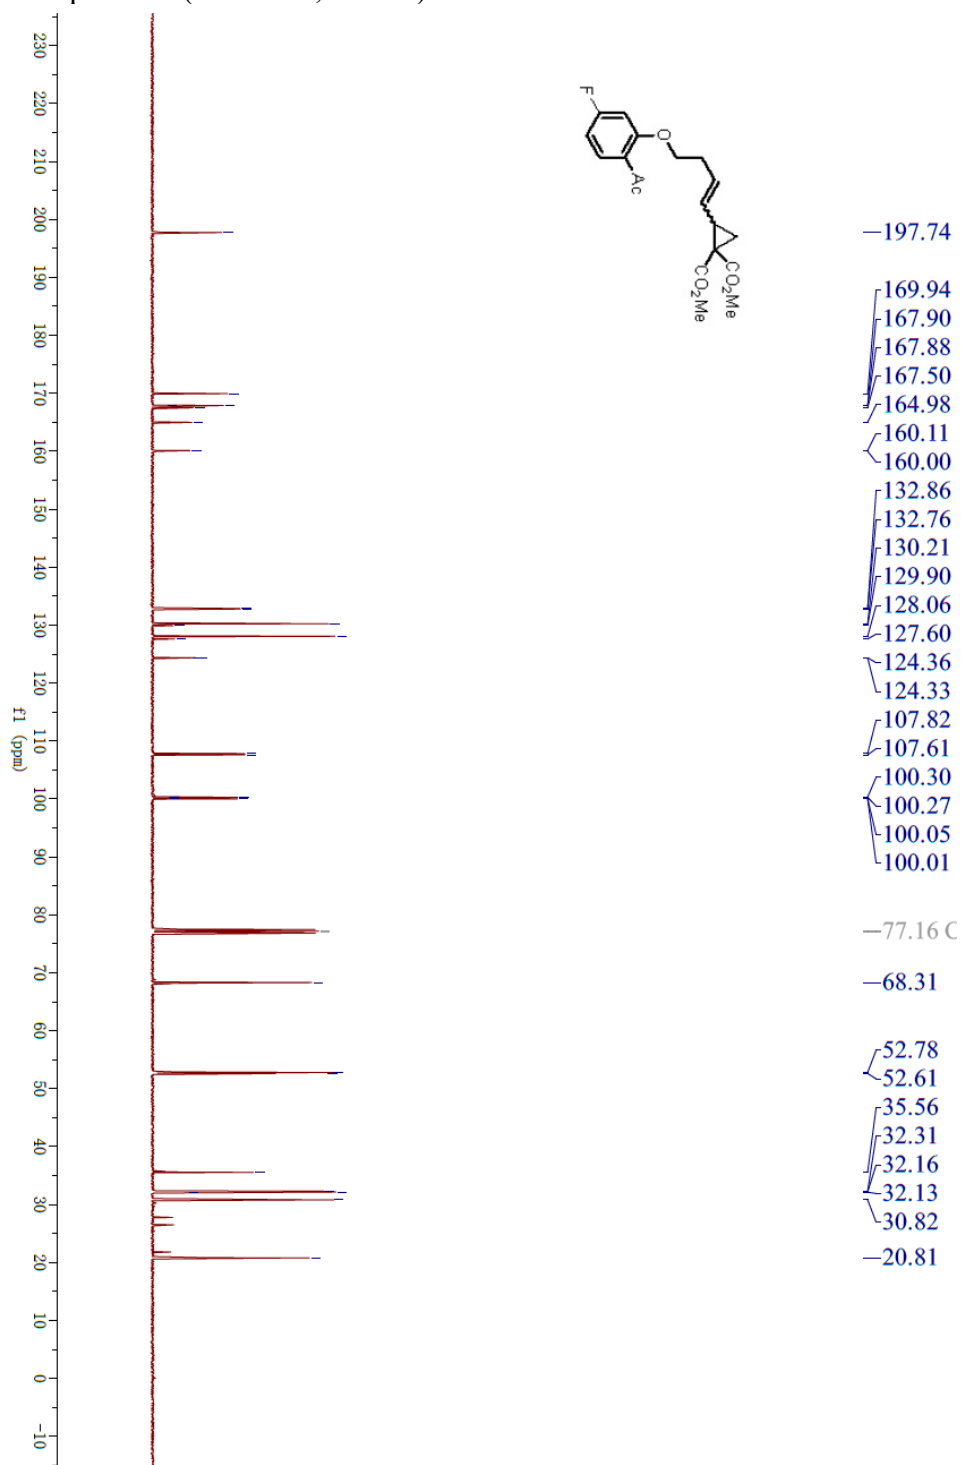

<sup>19</sup>F NMR Spectrum (376 MHz, CDCl<sub>3</sub>) of **9b**

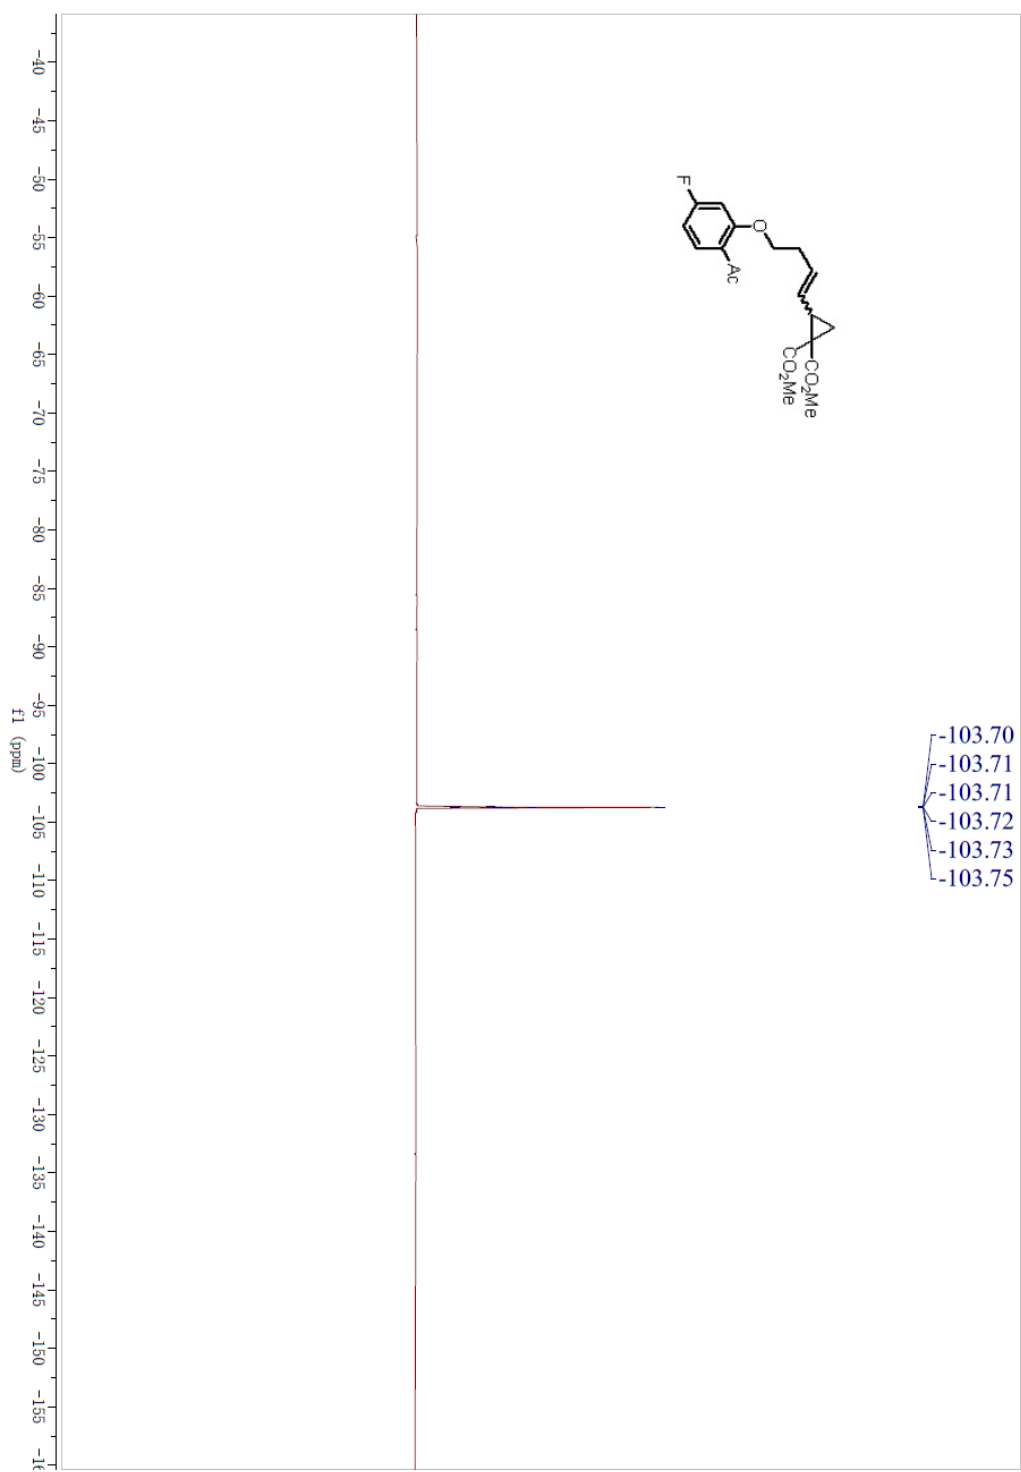

<sup>1</sup>H NMR Spectrum (400 MHz, CDCl<sub>3</sub>) of *E*-2a

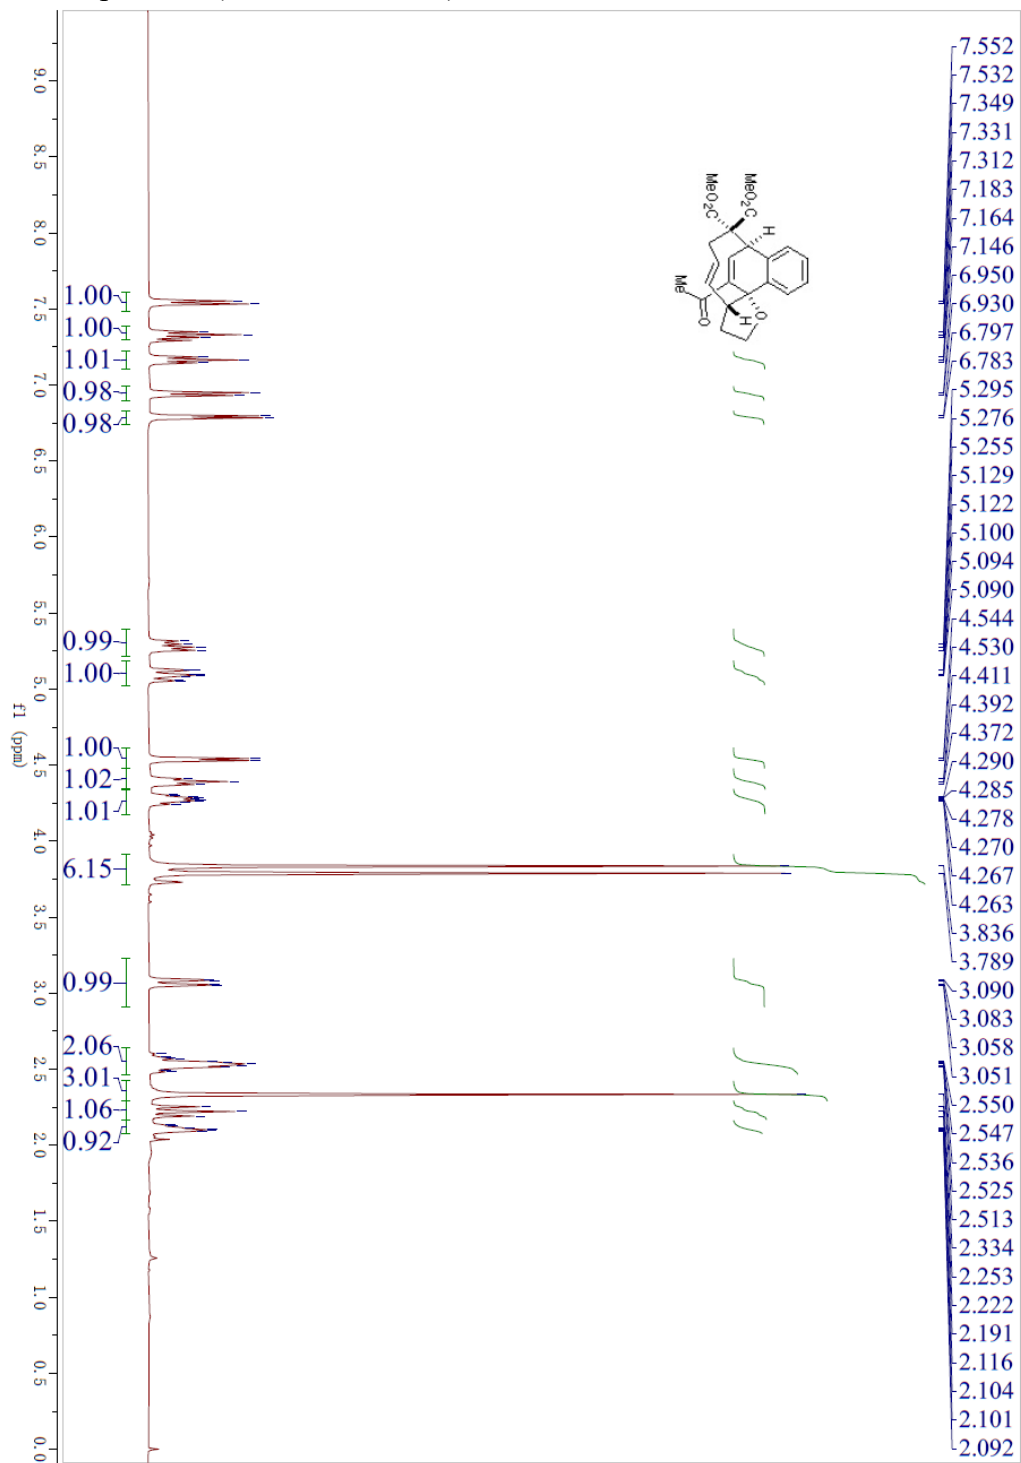

<sup>13</sup>C NMR Spectrum (100 MHz, CDCl<sub>3</sub>) of *E*-2a

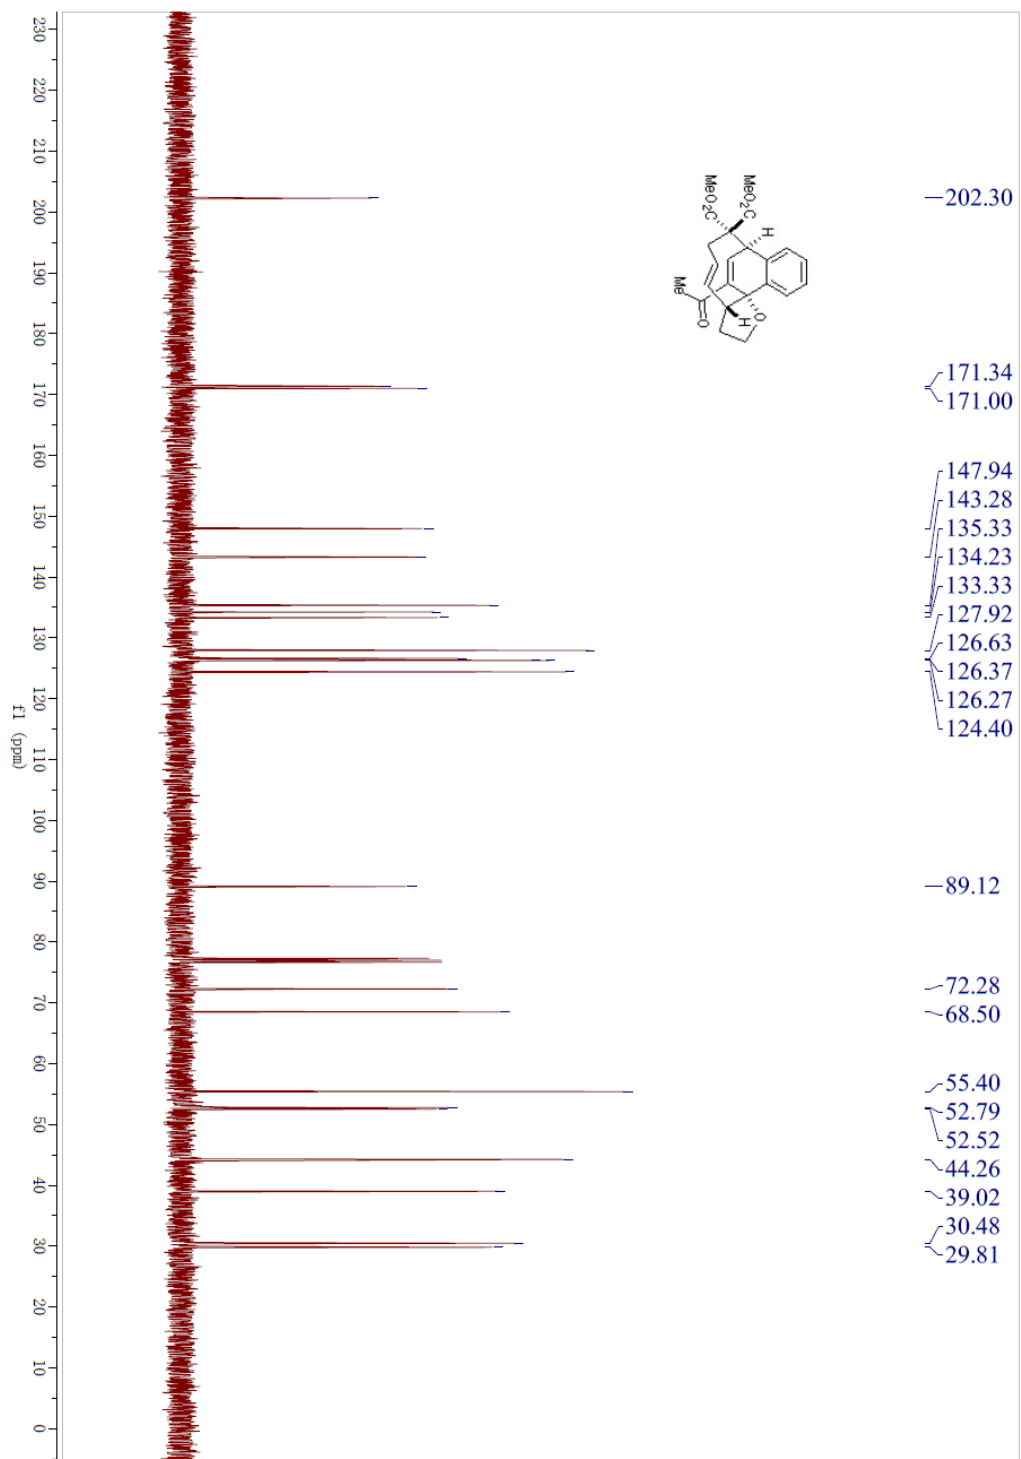



<sup>1</sup>H NMR Spectrum (400 MHz, CDCl<sub>3</sub>) of Z-2a

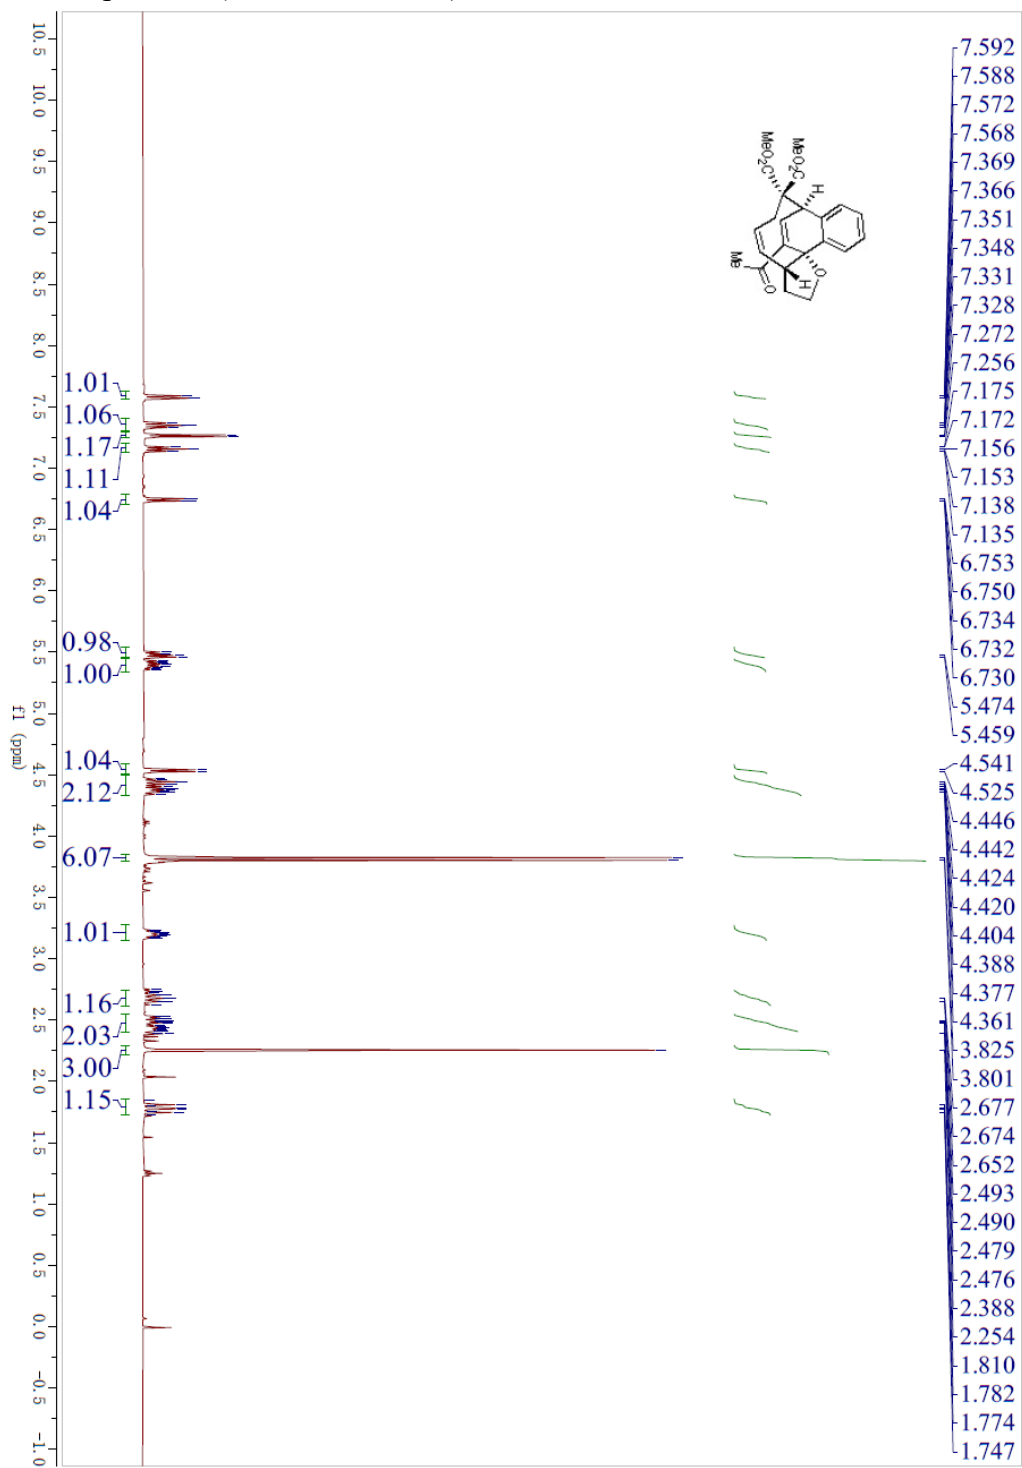

<sup>13</sup>C NMR Spectrum (100 MHz, CDCl<sub>3</sub>) of Z-2a

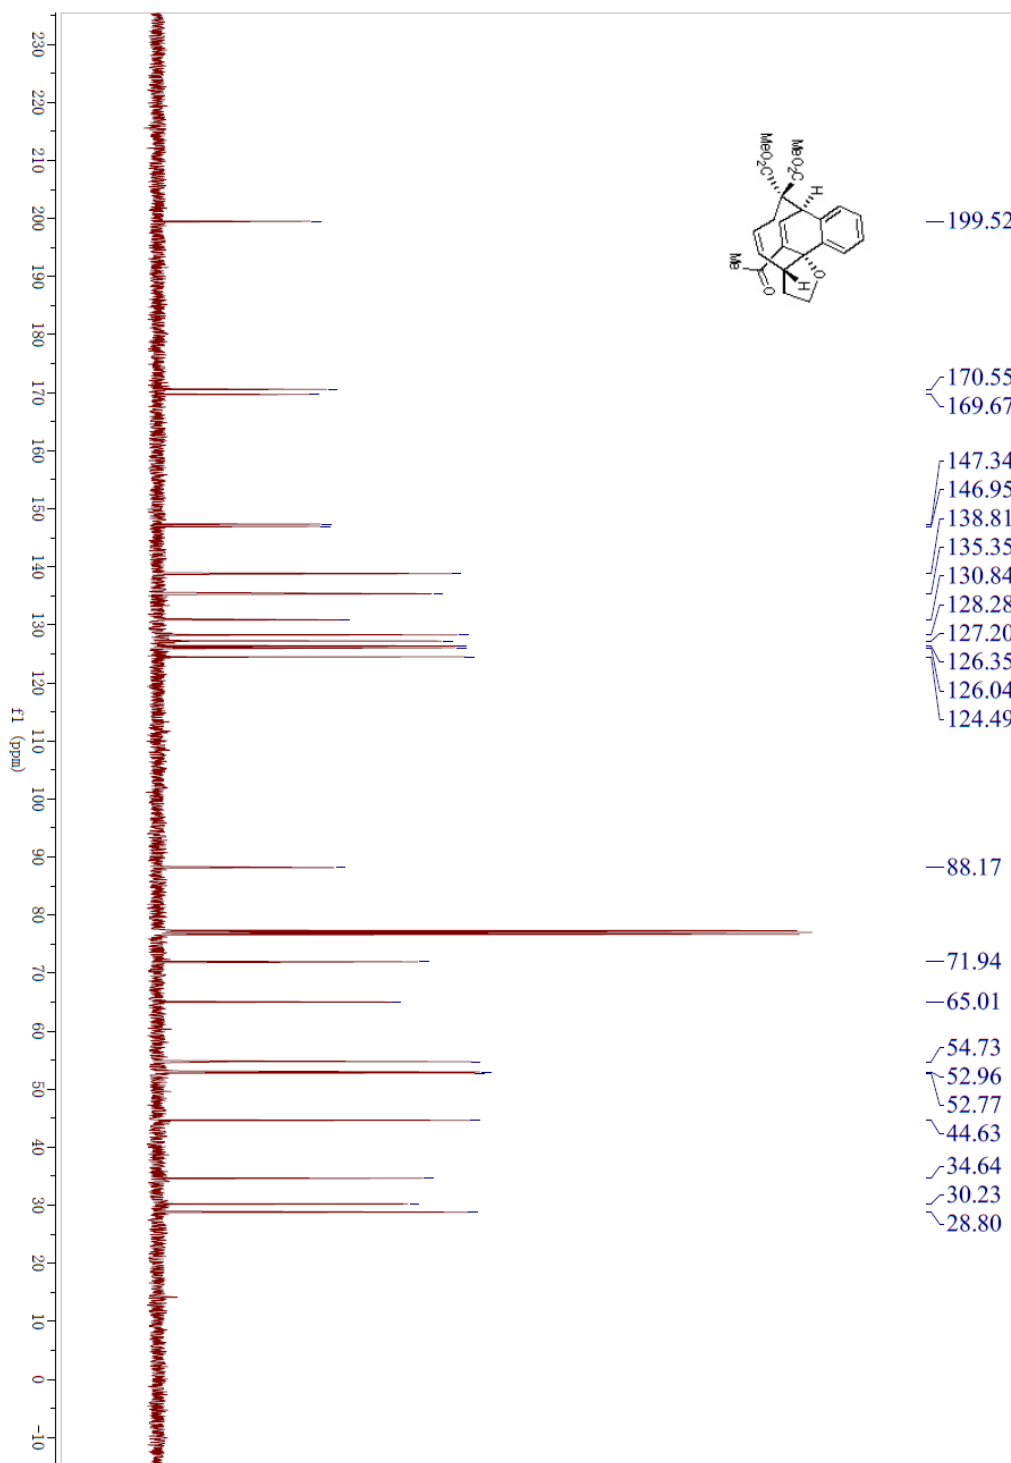

<sup>1</sup>H NMR Spectrum (400 MHz, CDCl<sub>3</sub>) of *E-2b*

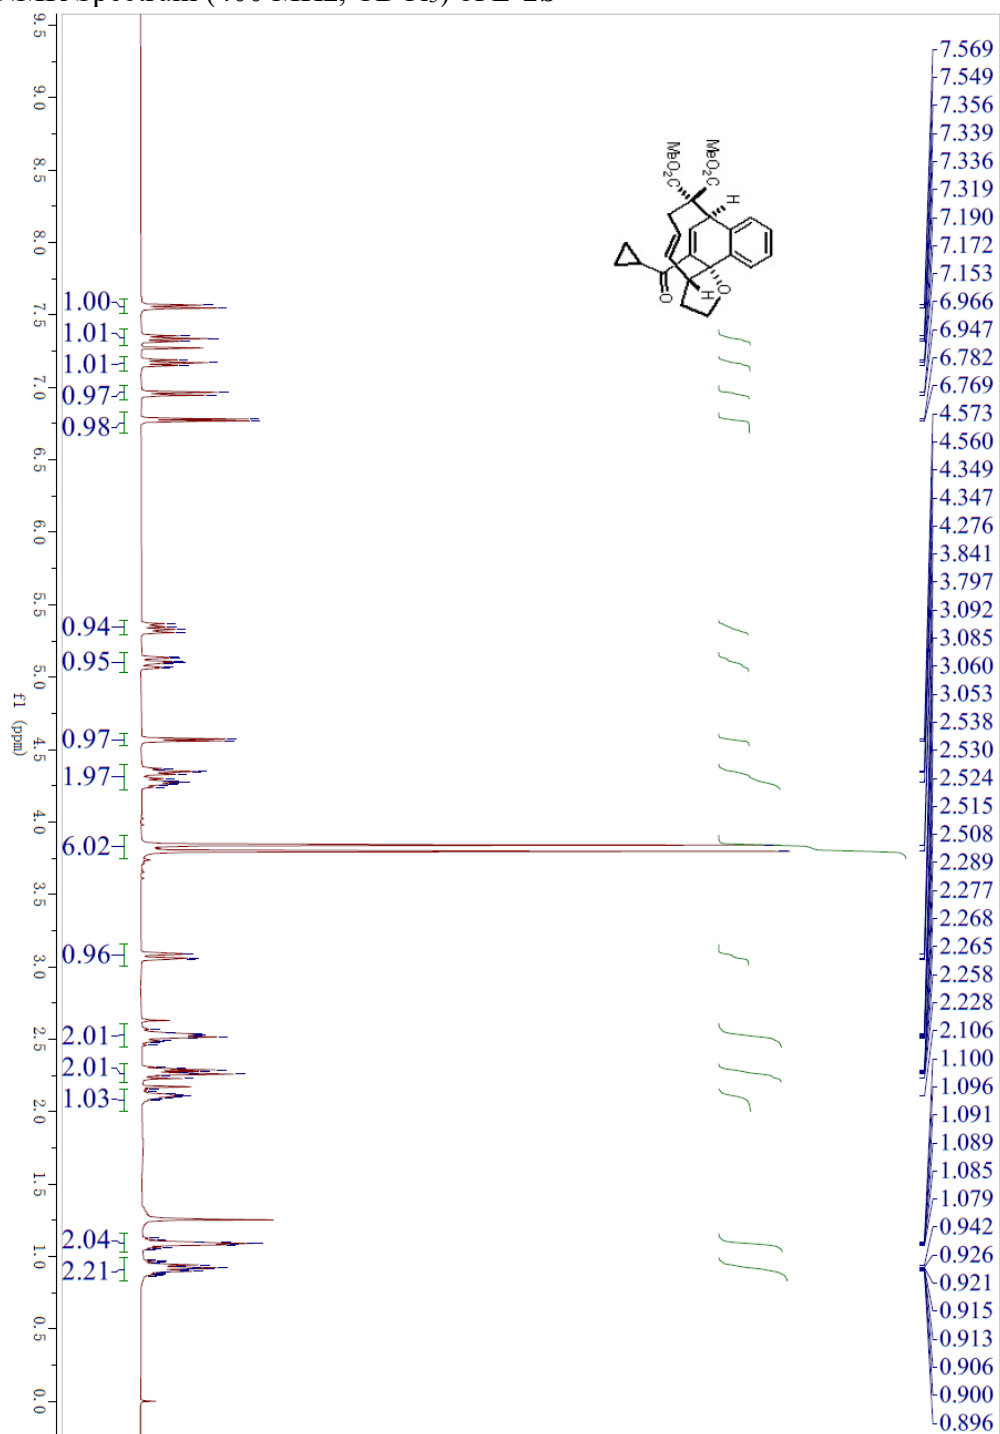

<sup>13</sup>C NMR Spectrum (100 MHz, CDCl<sub>3</sub>) of *E*-2b

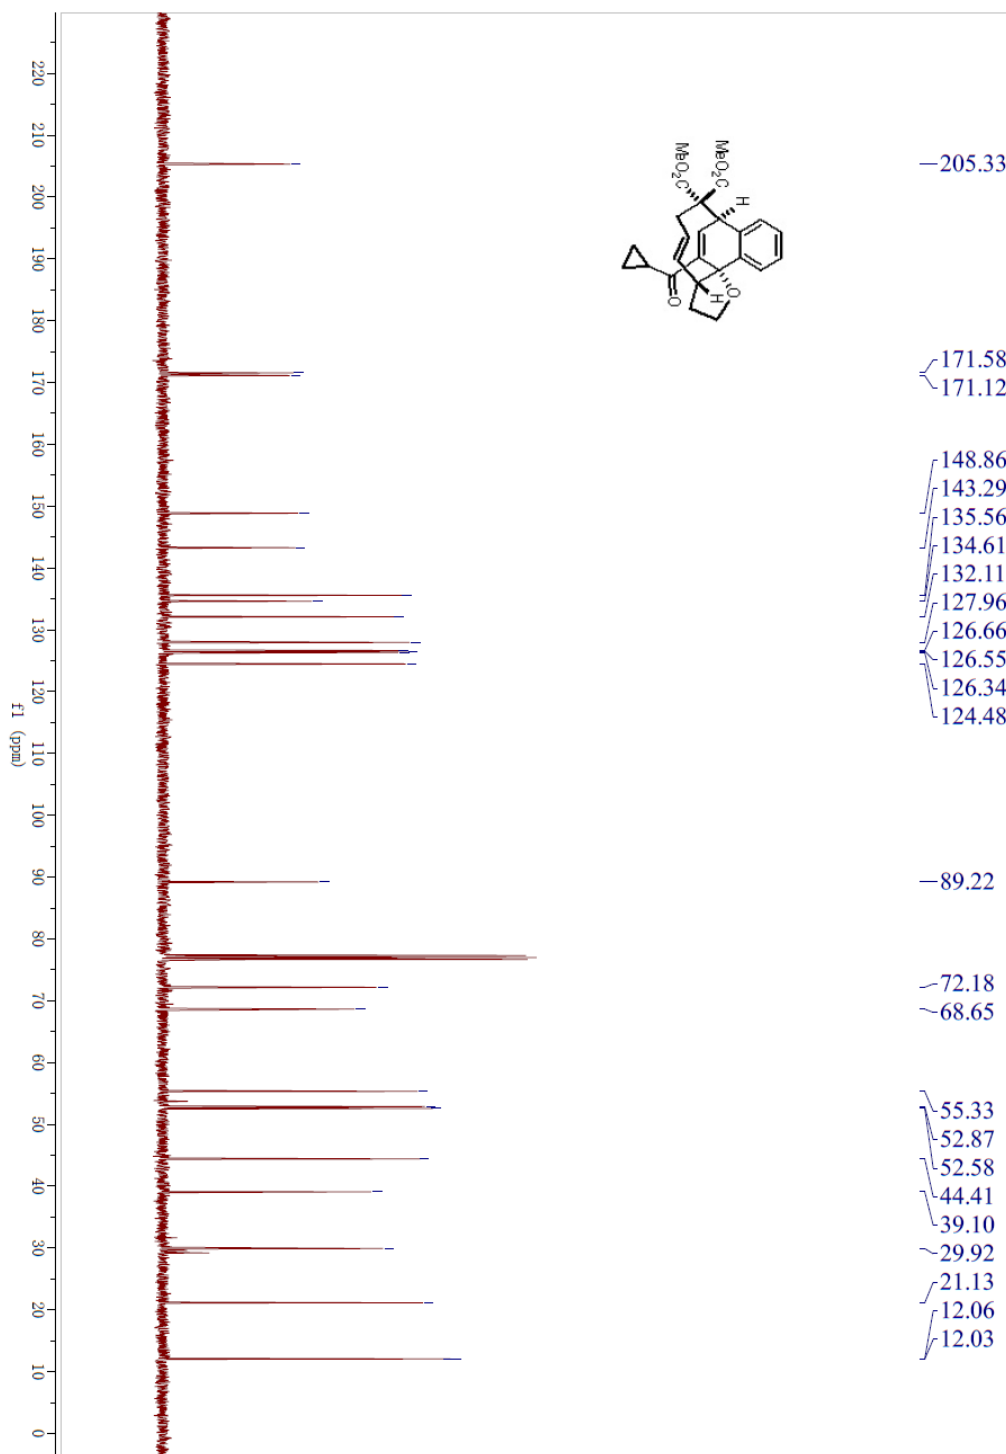

<sup>1</sup>H NMR Spectrum (400 MHz, CDCl<sub>3</sub>) of *E*-2c

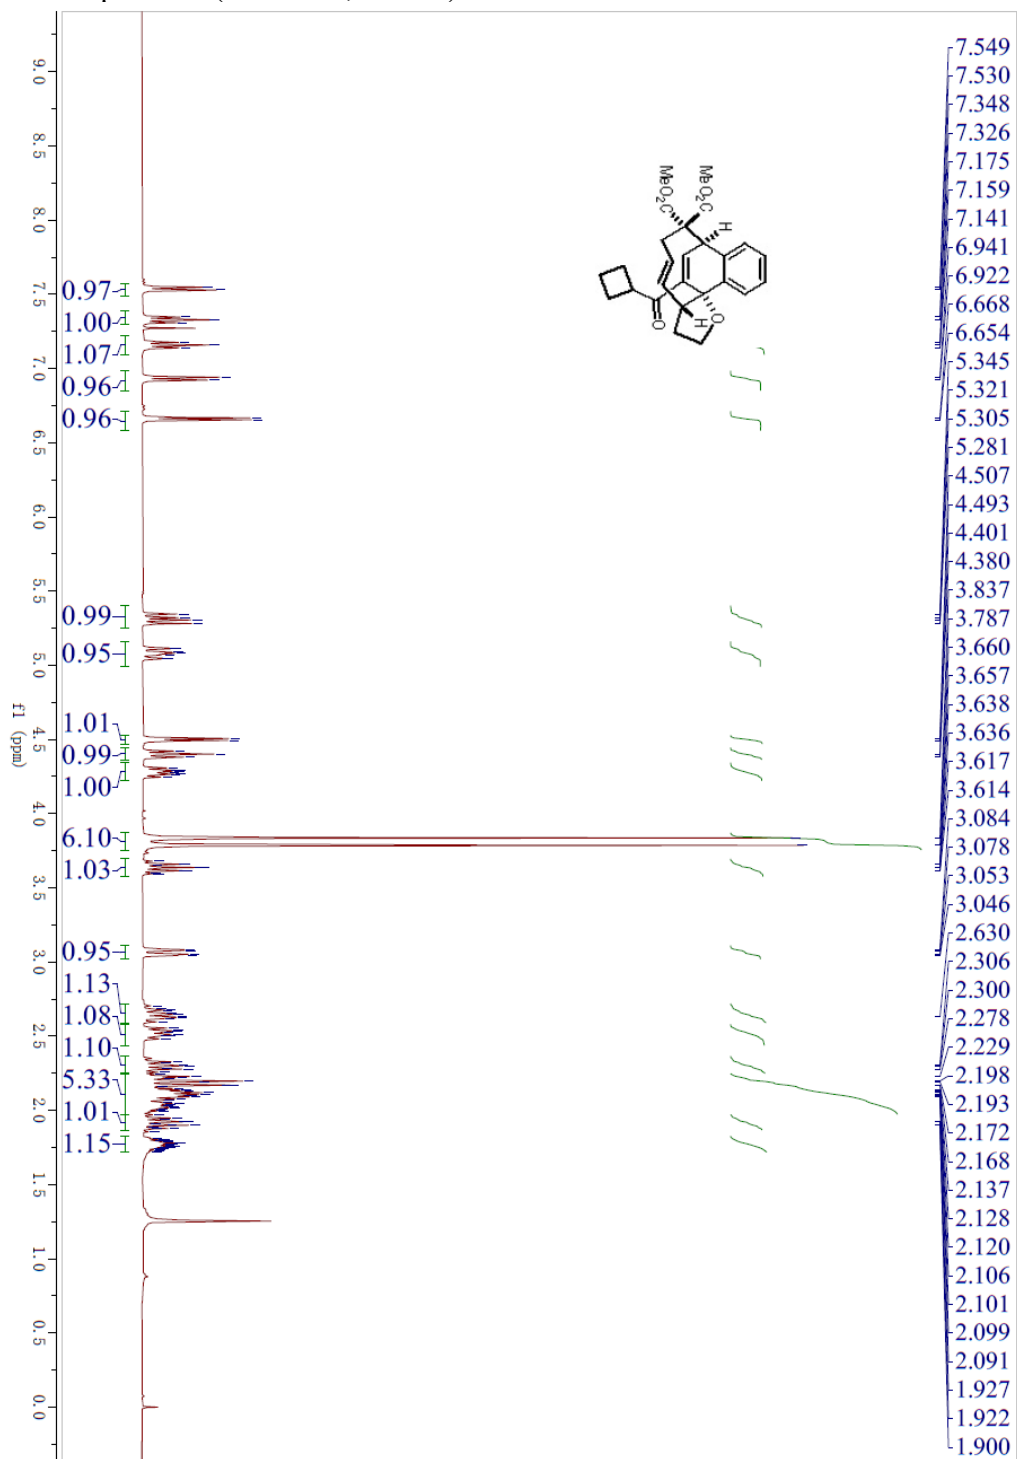

$^{13}\text{C}$  NMR Spectrum (100 MHz,  $\text{CDCl}_3$ ) of *E*-2c

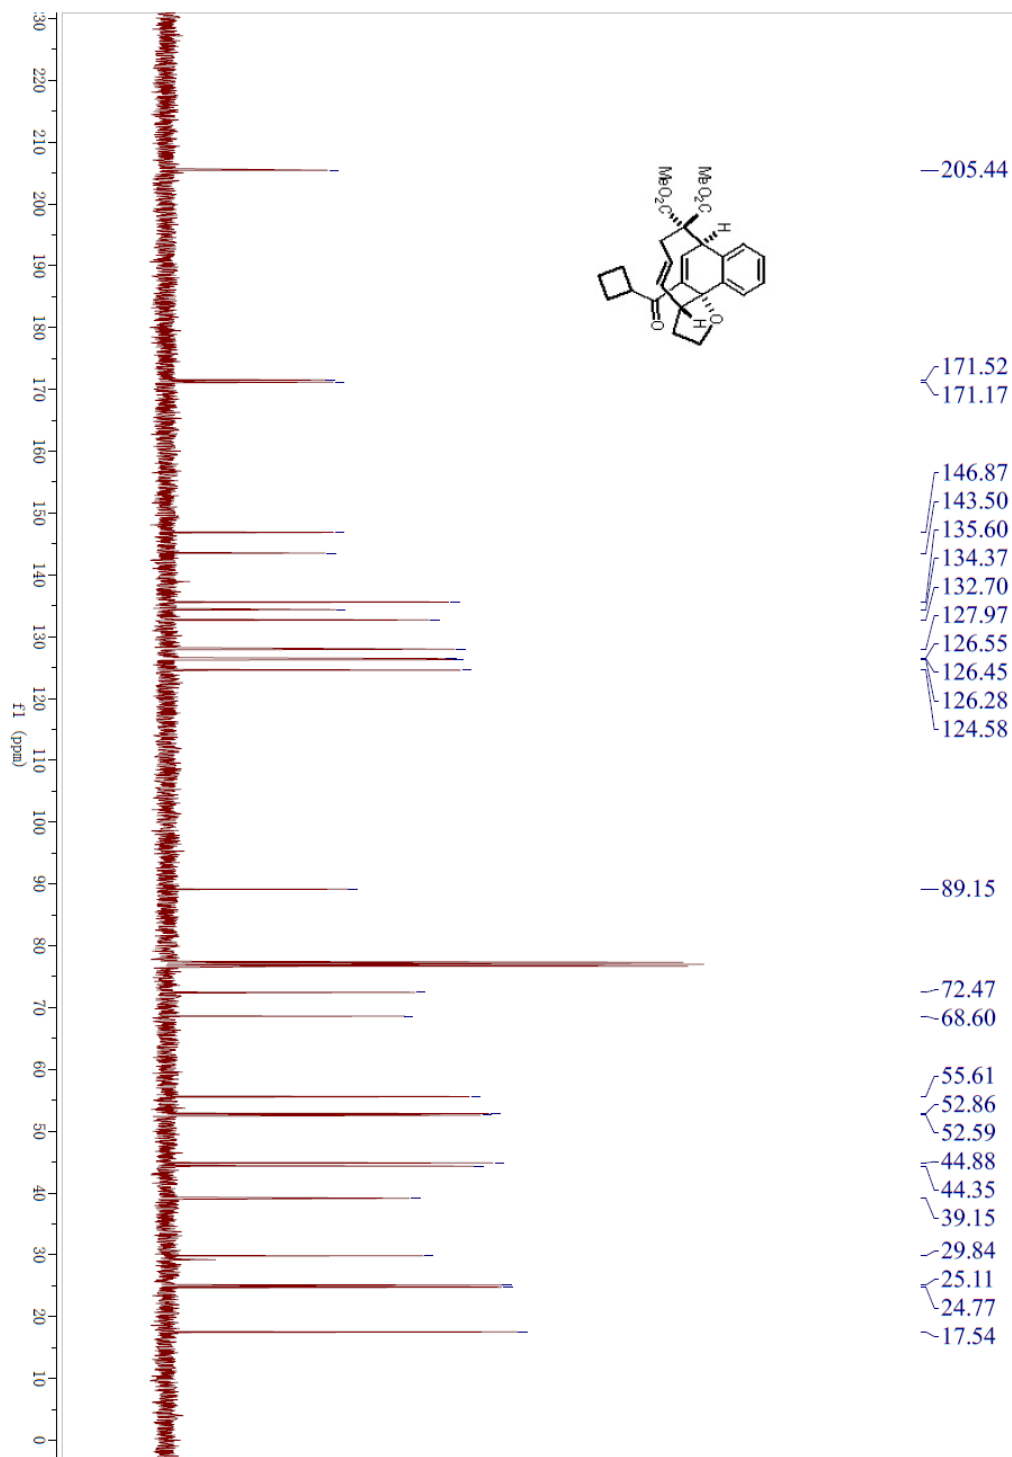

<sup>1</sup>H NMR Spectrum (400 MHz, CDCl<sub>3</sub>) of *E*-2d

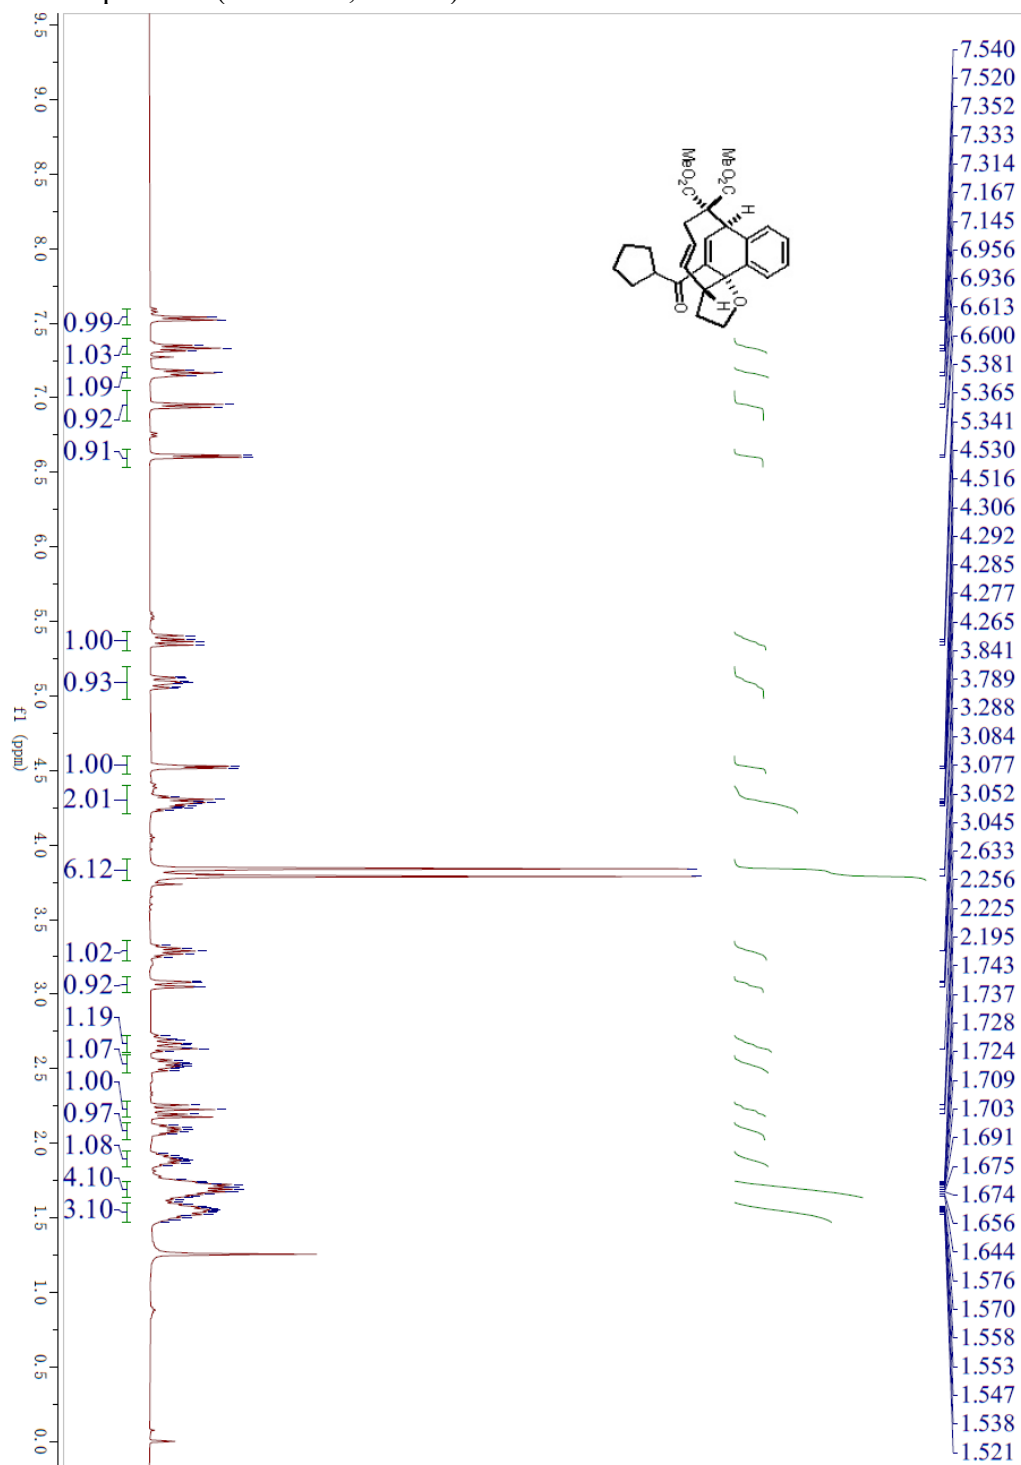

<sup>13</sup>C NMR Spectrum (100 MHz, CDCl<sub>3</sub>) of *E*-2d

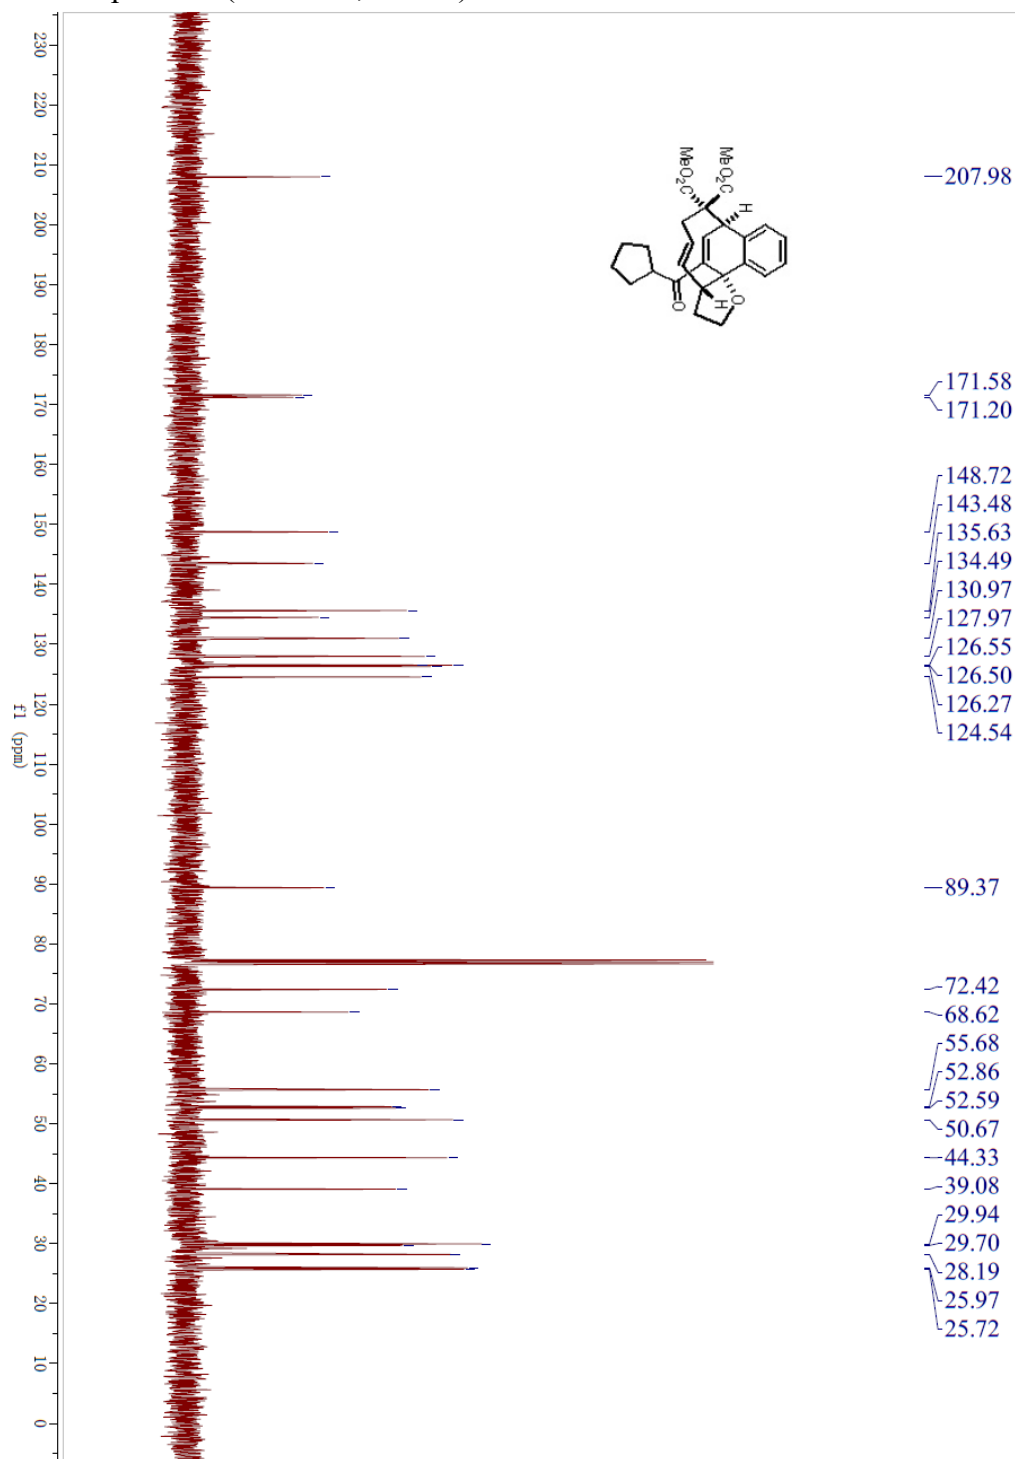



<sup>1</sup>H NMR Spectrum (400 MHz, CDCl<sub>3</sub>) of *E-2e*

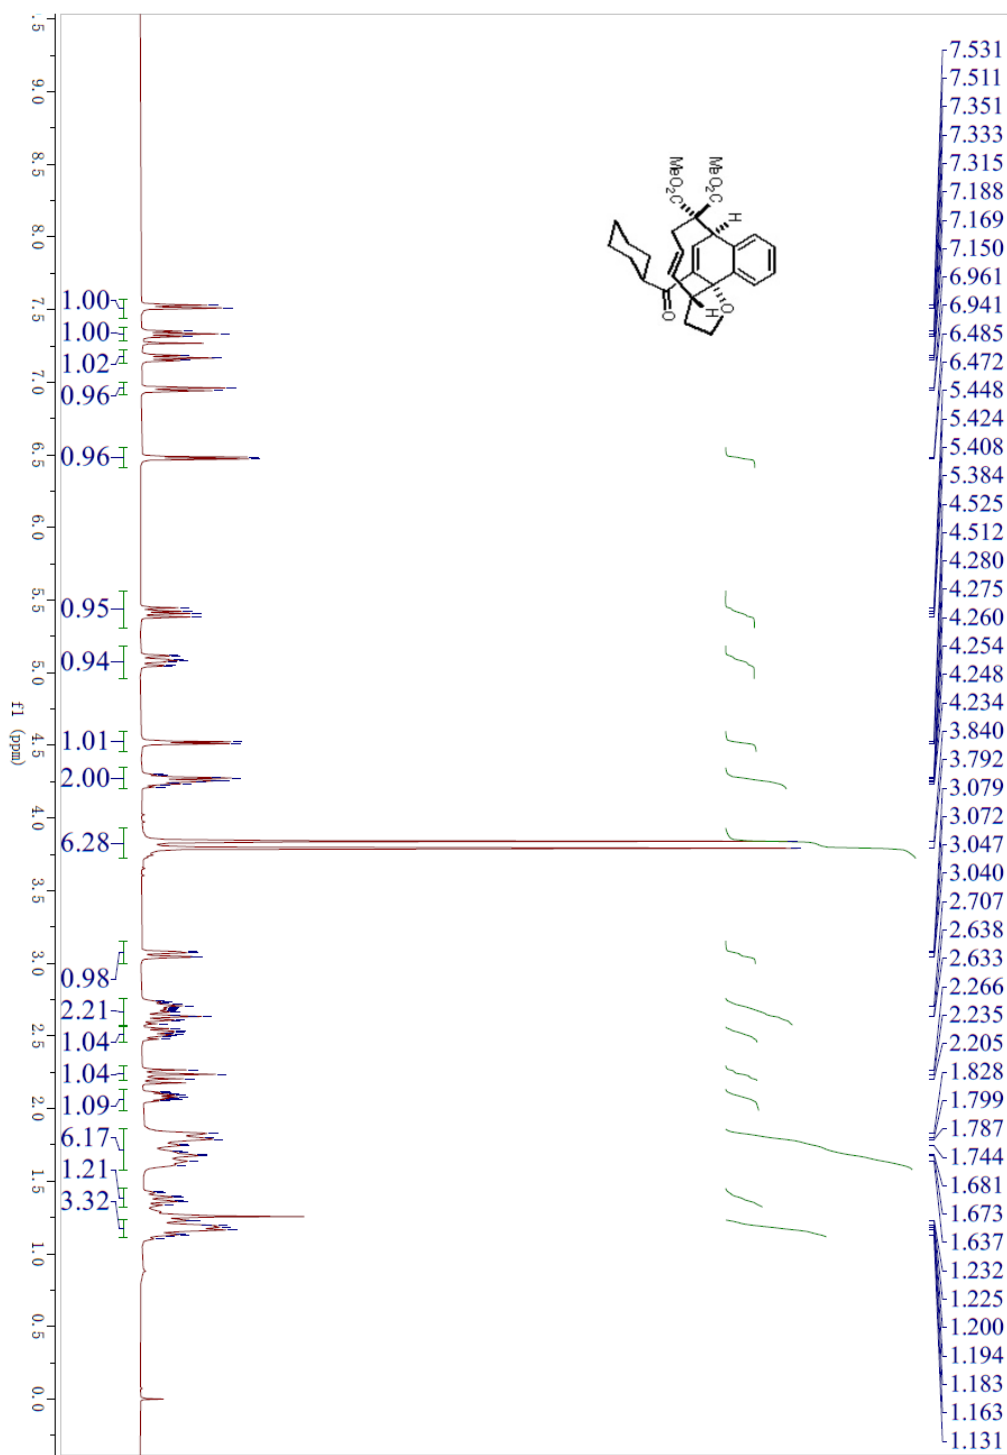

<sup>13</sup>C NMR Spectrum (100 MHz, CDCl<sub>3</sub>) of *E-2e*

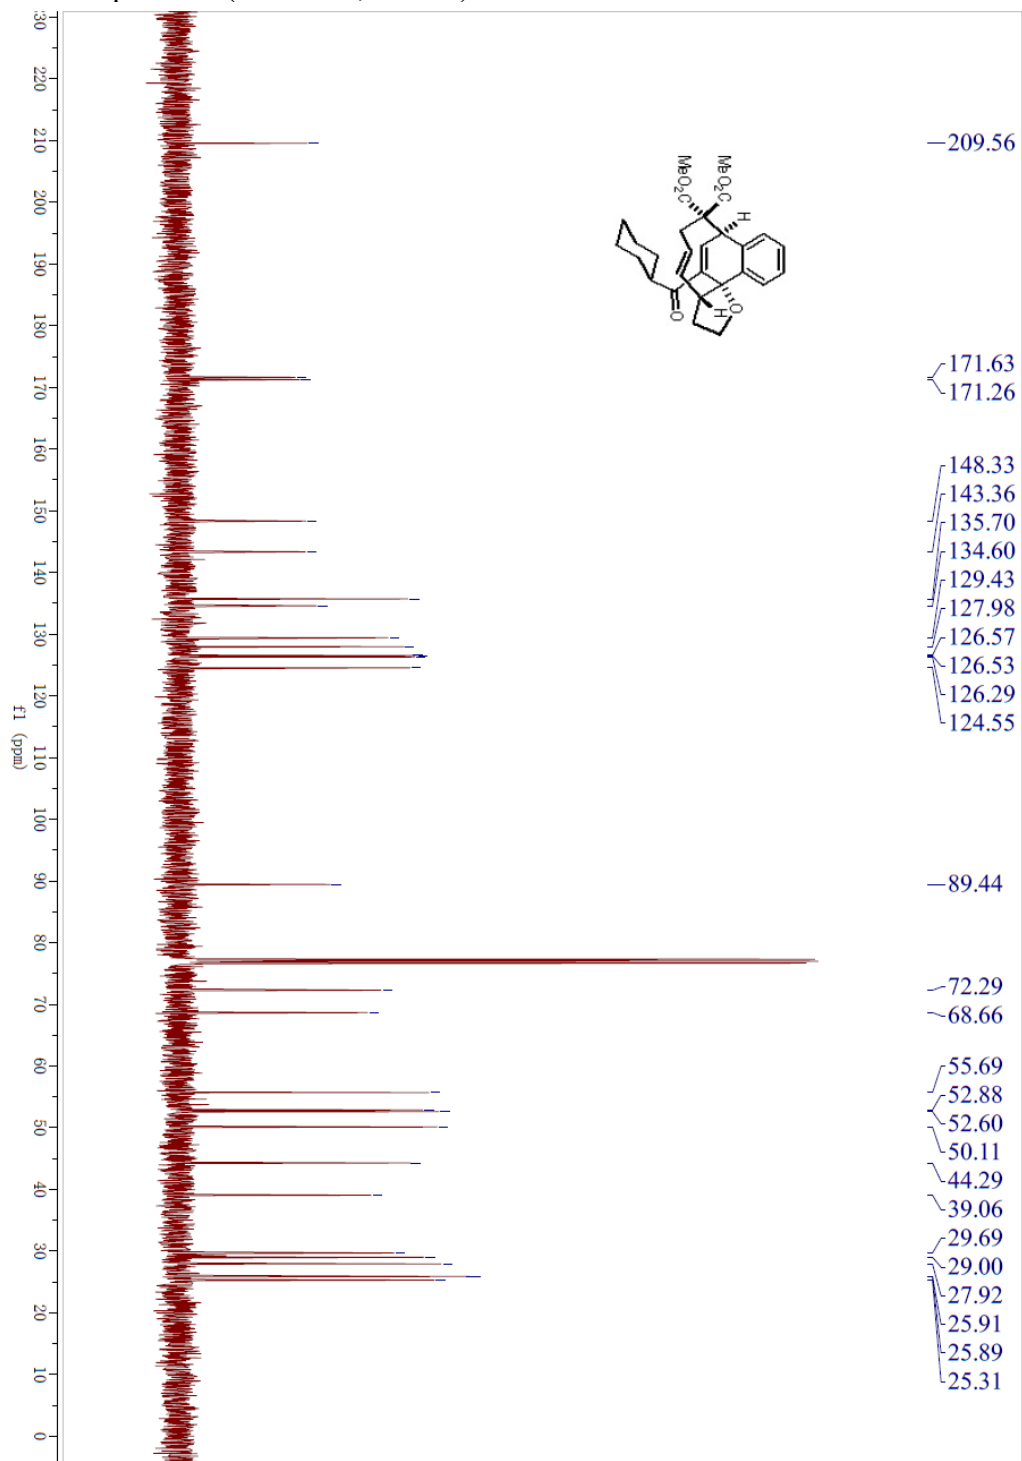

<sup>1</sup>H NMR Spectrum (400 MHz, CDCl<sub>3</sub>) of *E*-2f

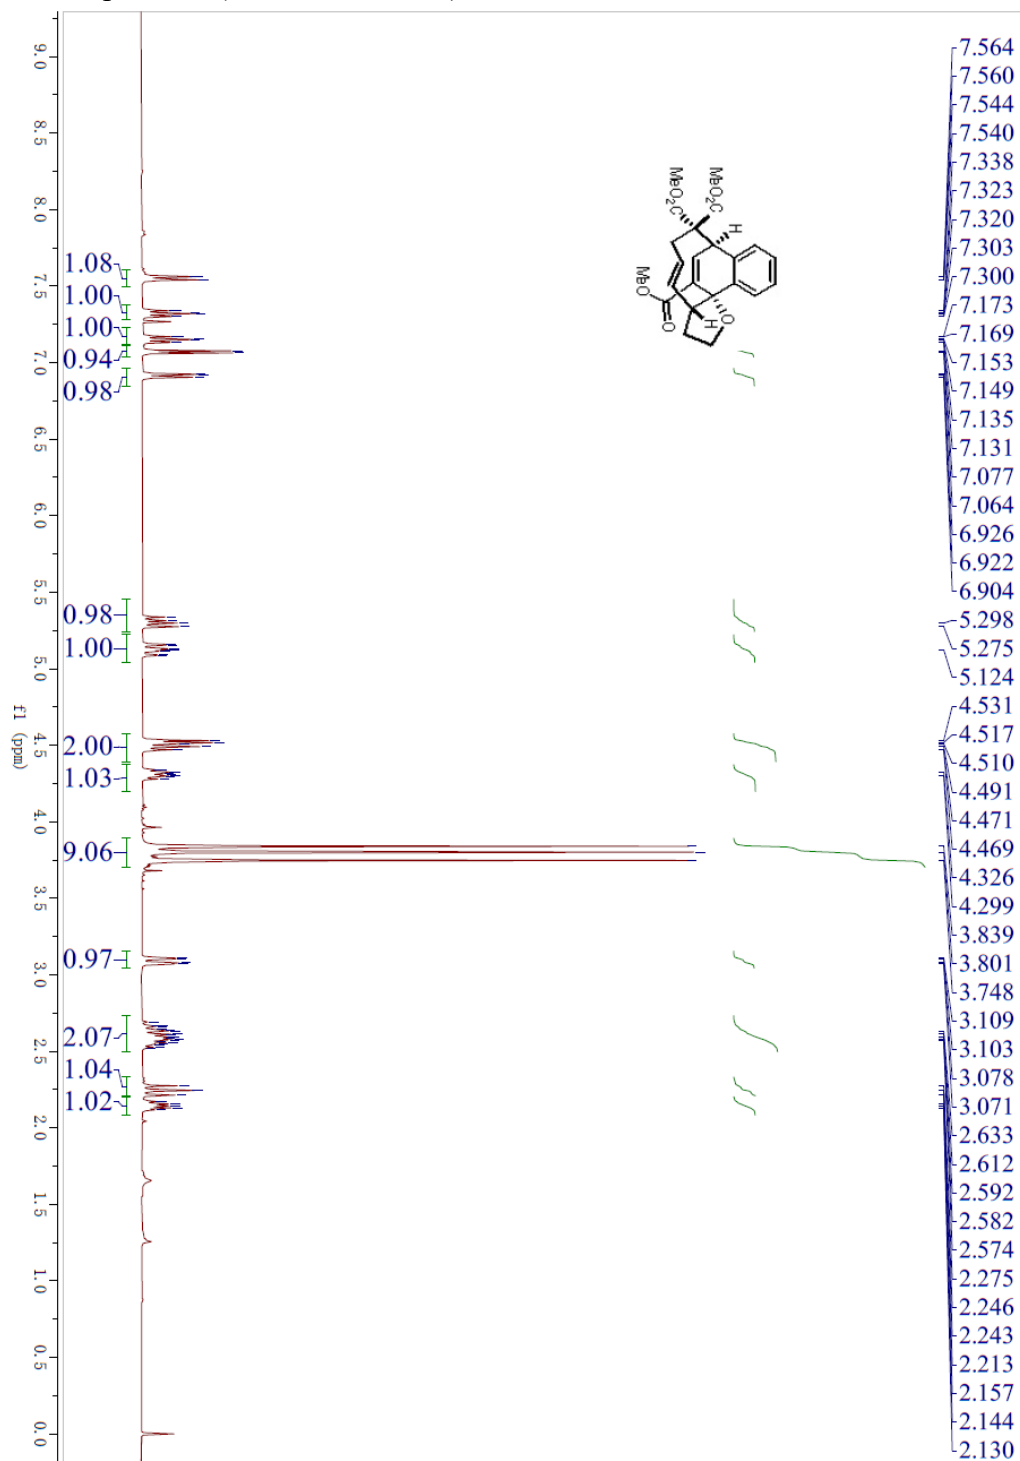

<sup>13</sup>C NMR Spectrum (100 MHz, CDCl<sub>3</sub>) of *E*-2f

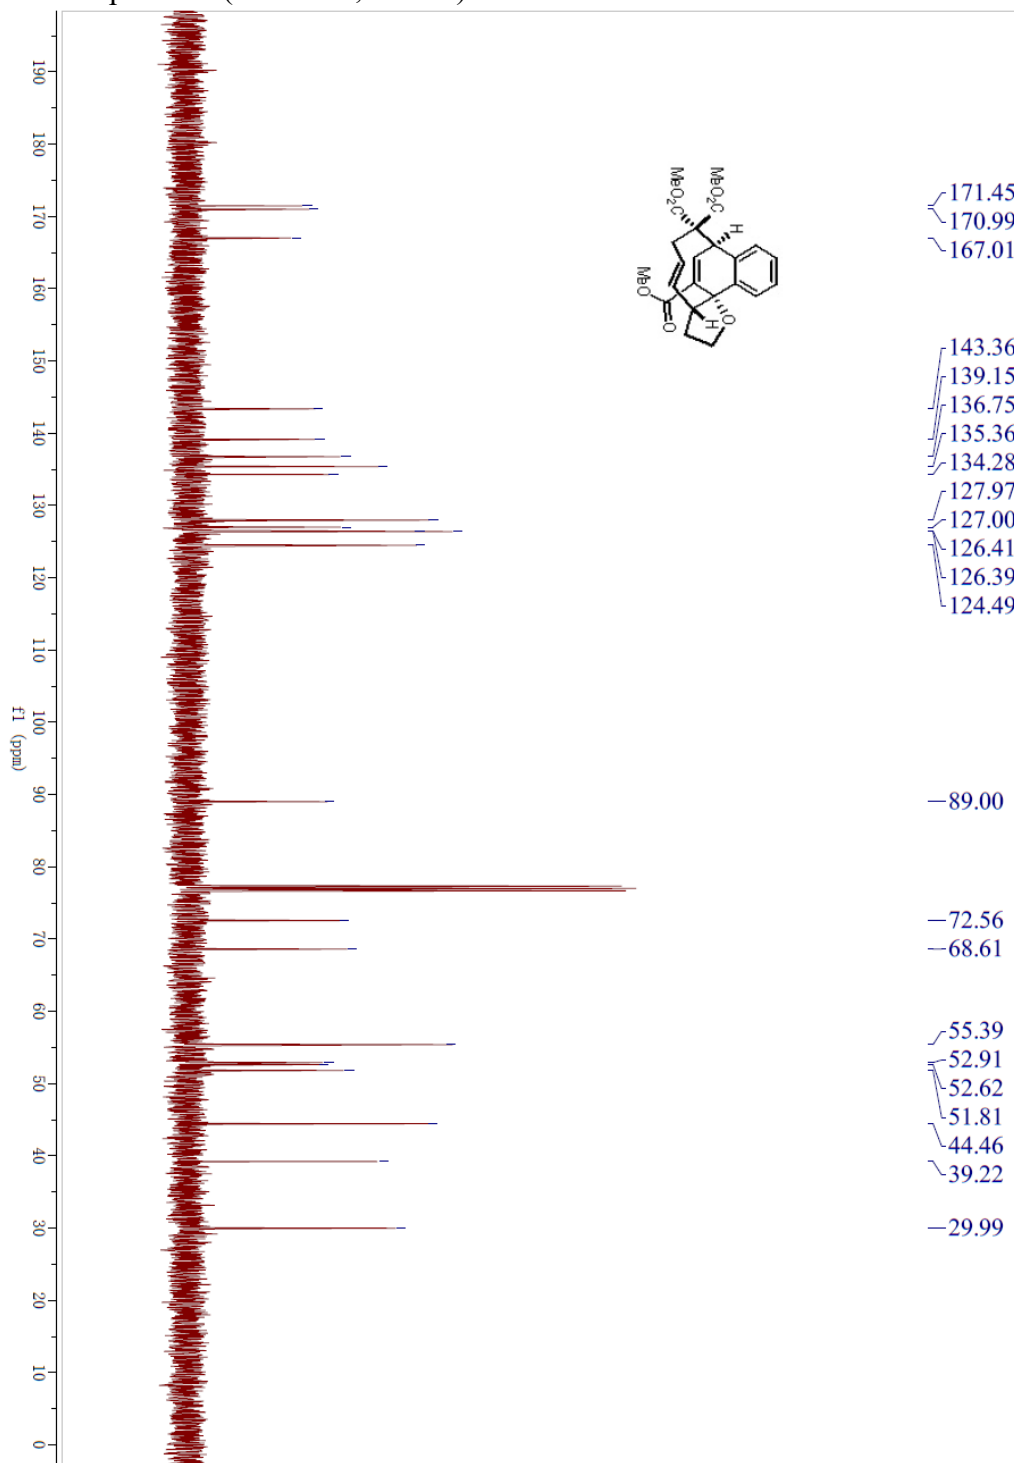

<sup>1</sup>H NMR Spectrum (400 MHz, CDCl<sub>3</sub>) of *E*-2g

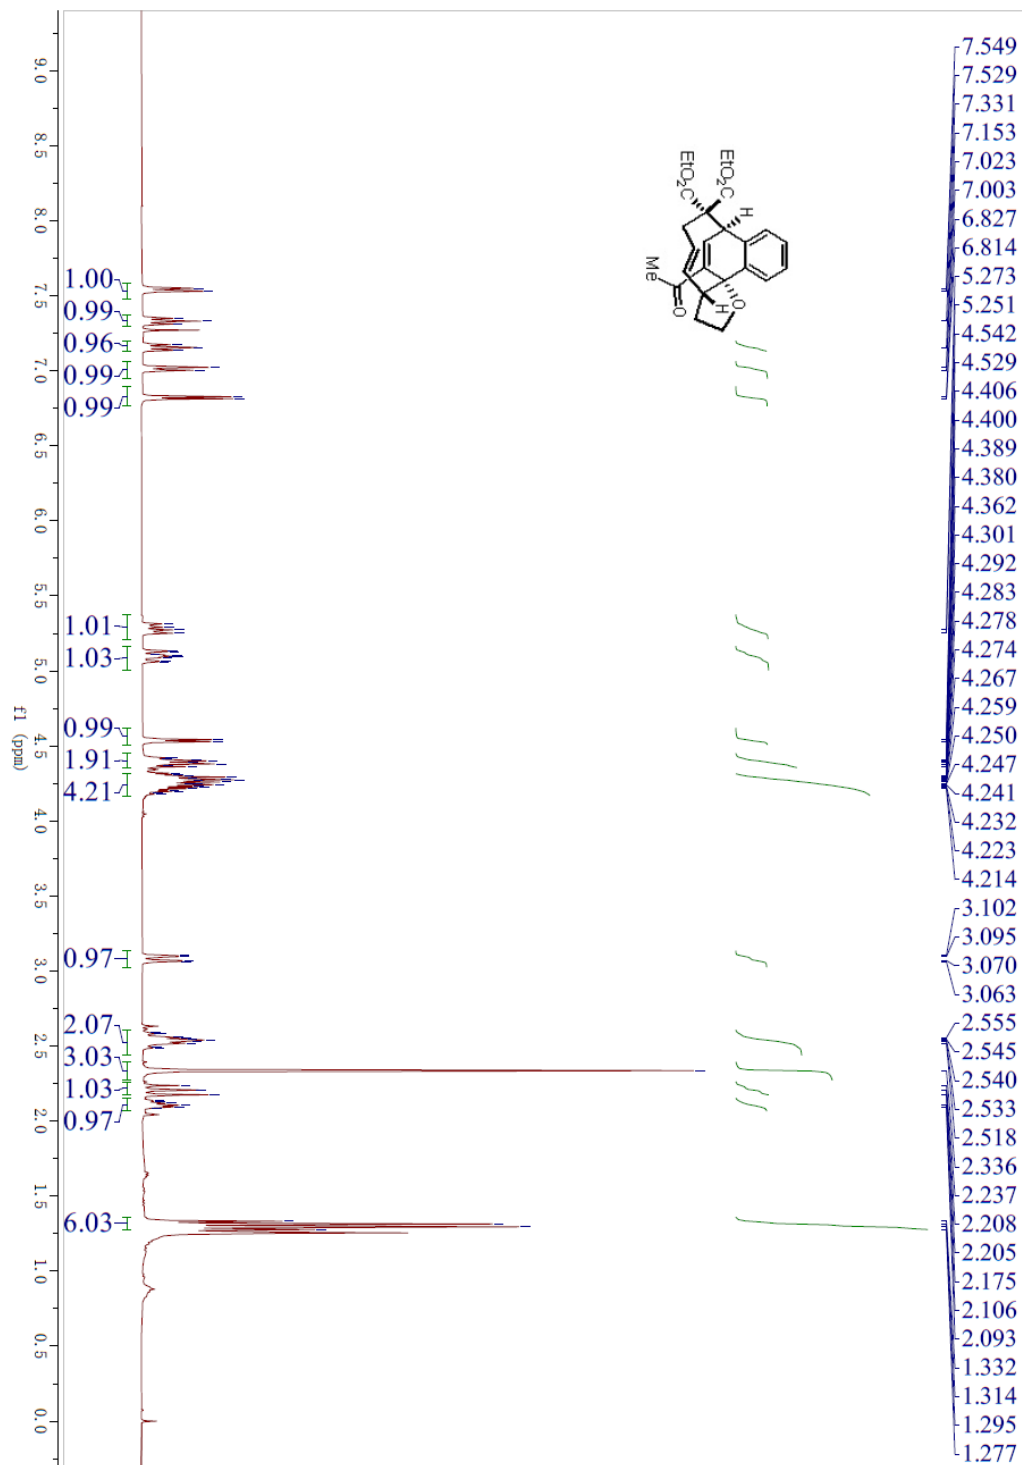

<sup>13</sup>C NMR Spectrum (100 MHz, CDCl<sub>3</sub>) of *E*-2g

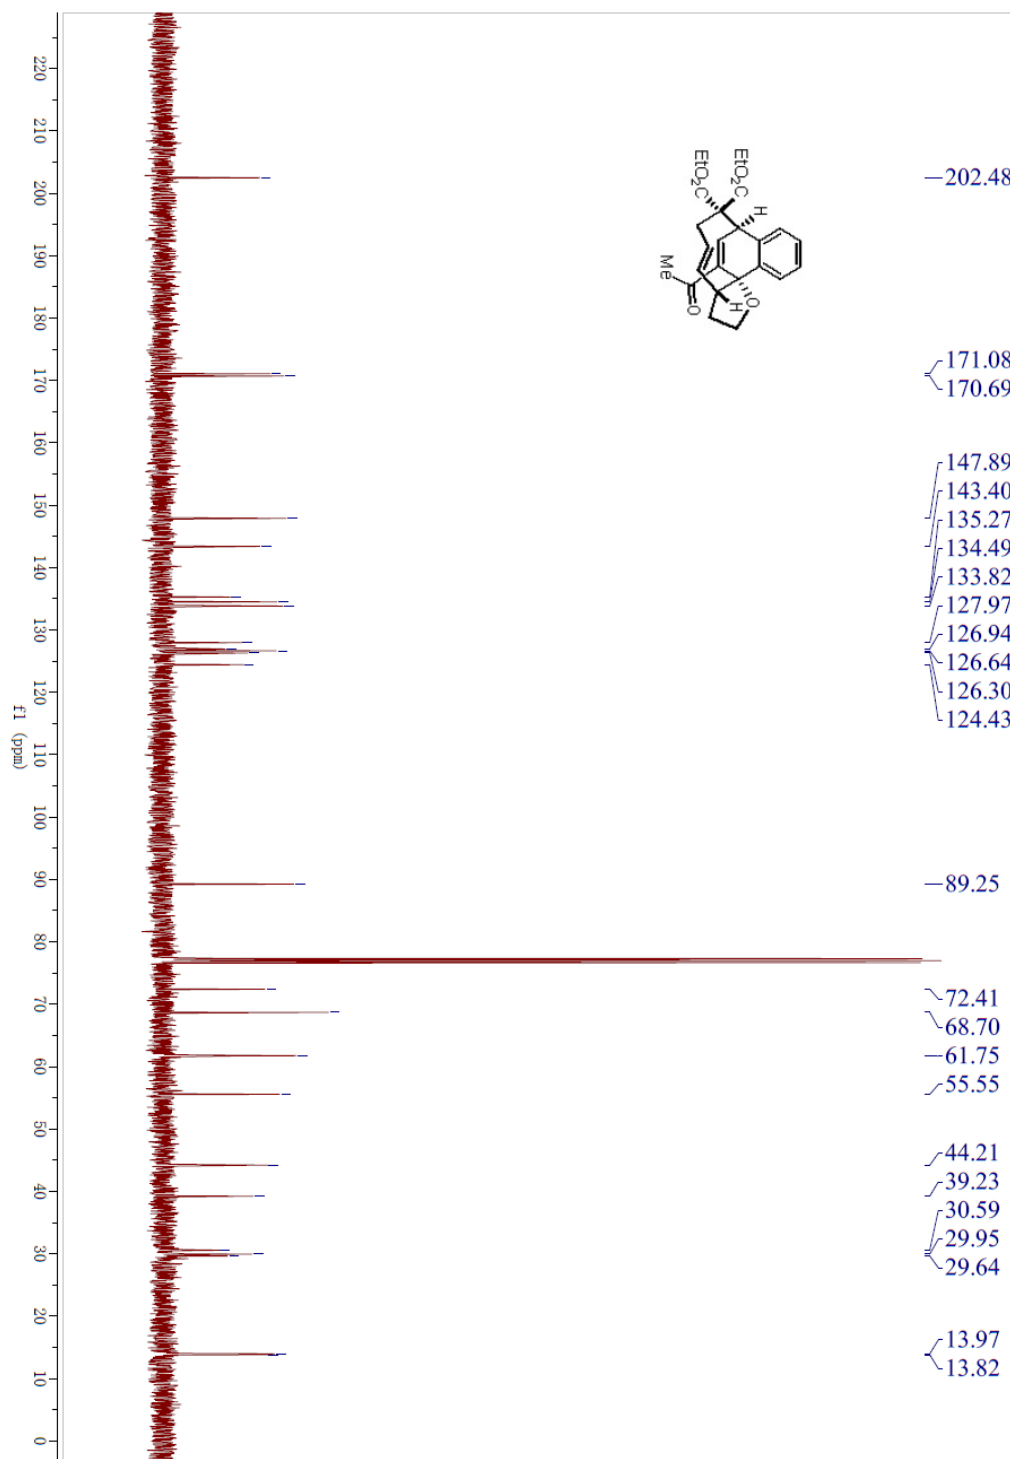

<sup>1</sup>H NMR Spectrum (400 MHz, CDCl<sub>3</sub>) of *E-2h*

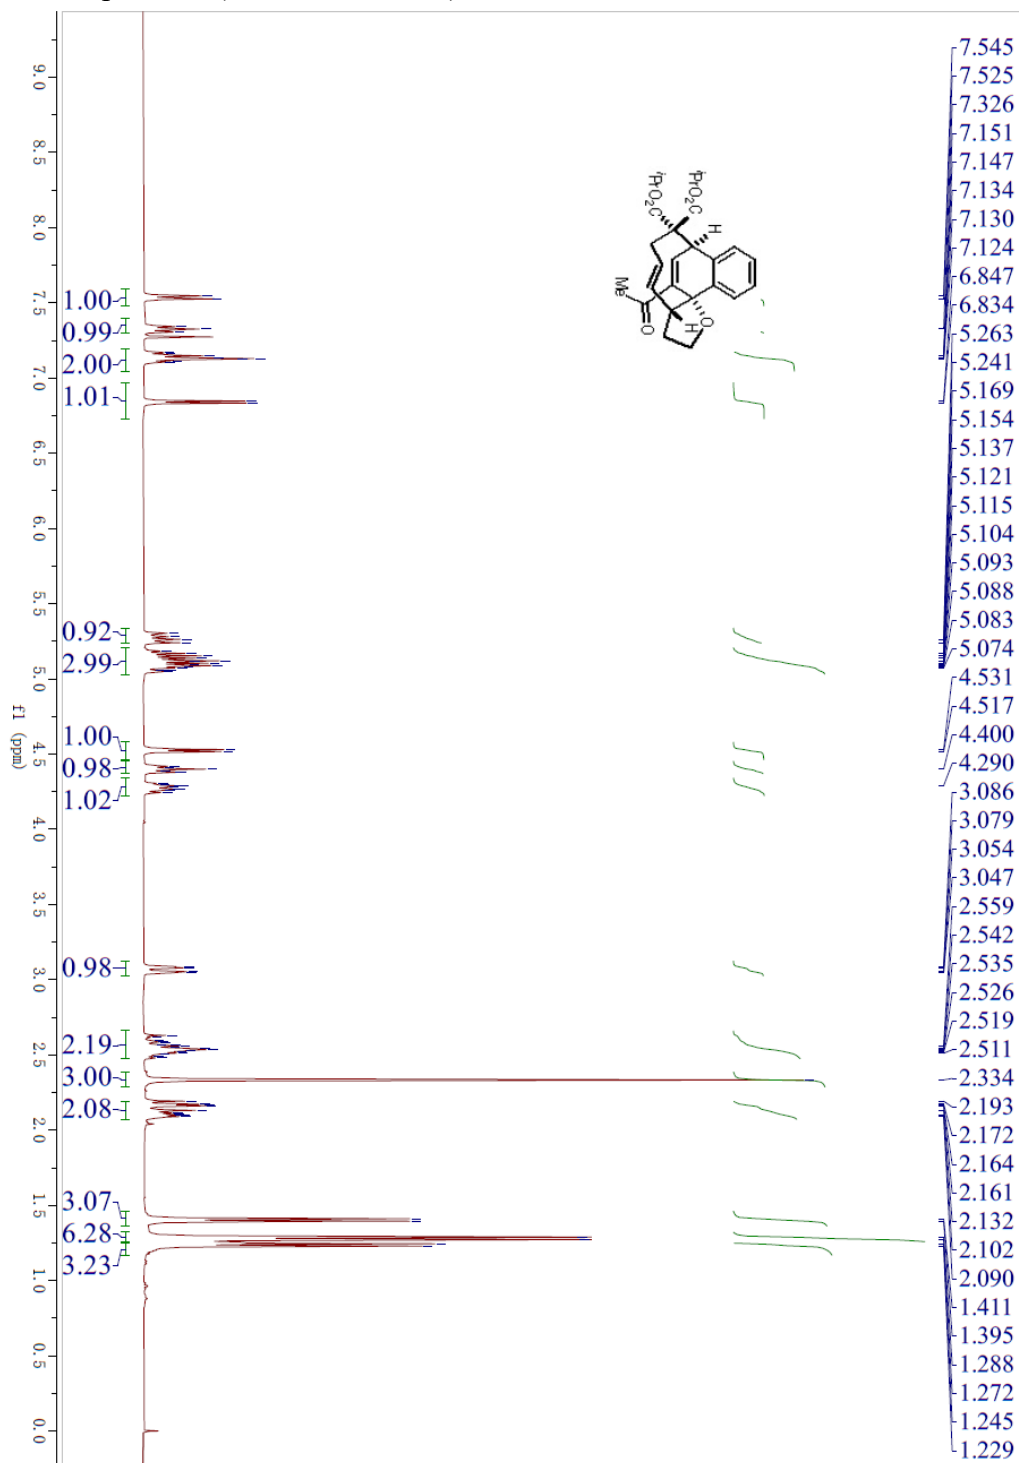

<sup>13</sup>C NMR Spectrum (100 MHz, CDCl<sub>3</sub>) of *E*-2h

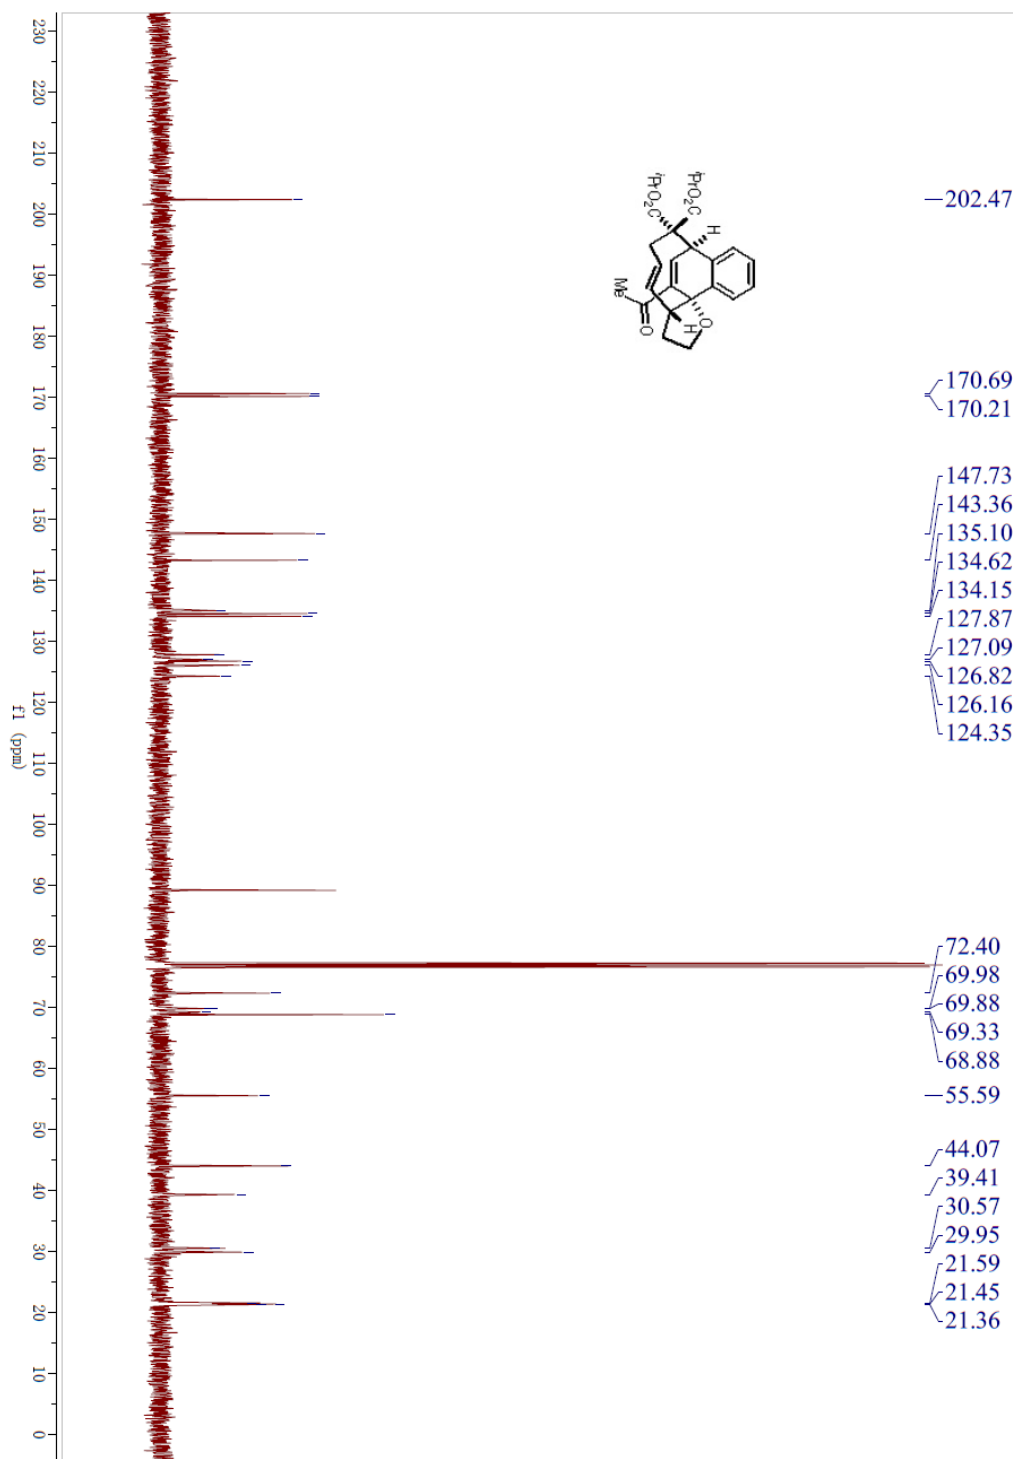



<sup>1</sup>H NMR Spectrum (400 MHz, CDCl<sub>3</sub>) of *E-2i*

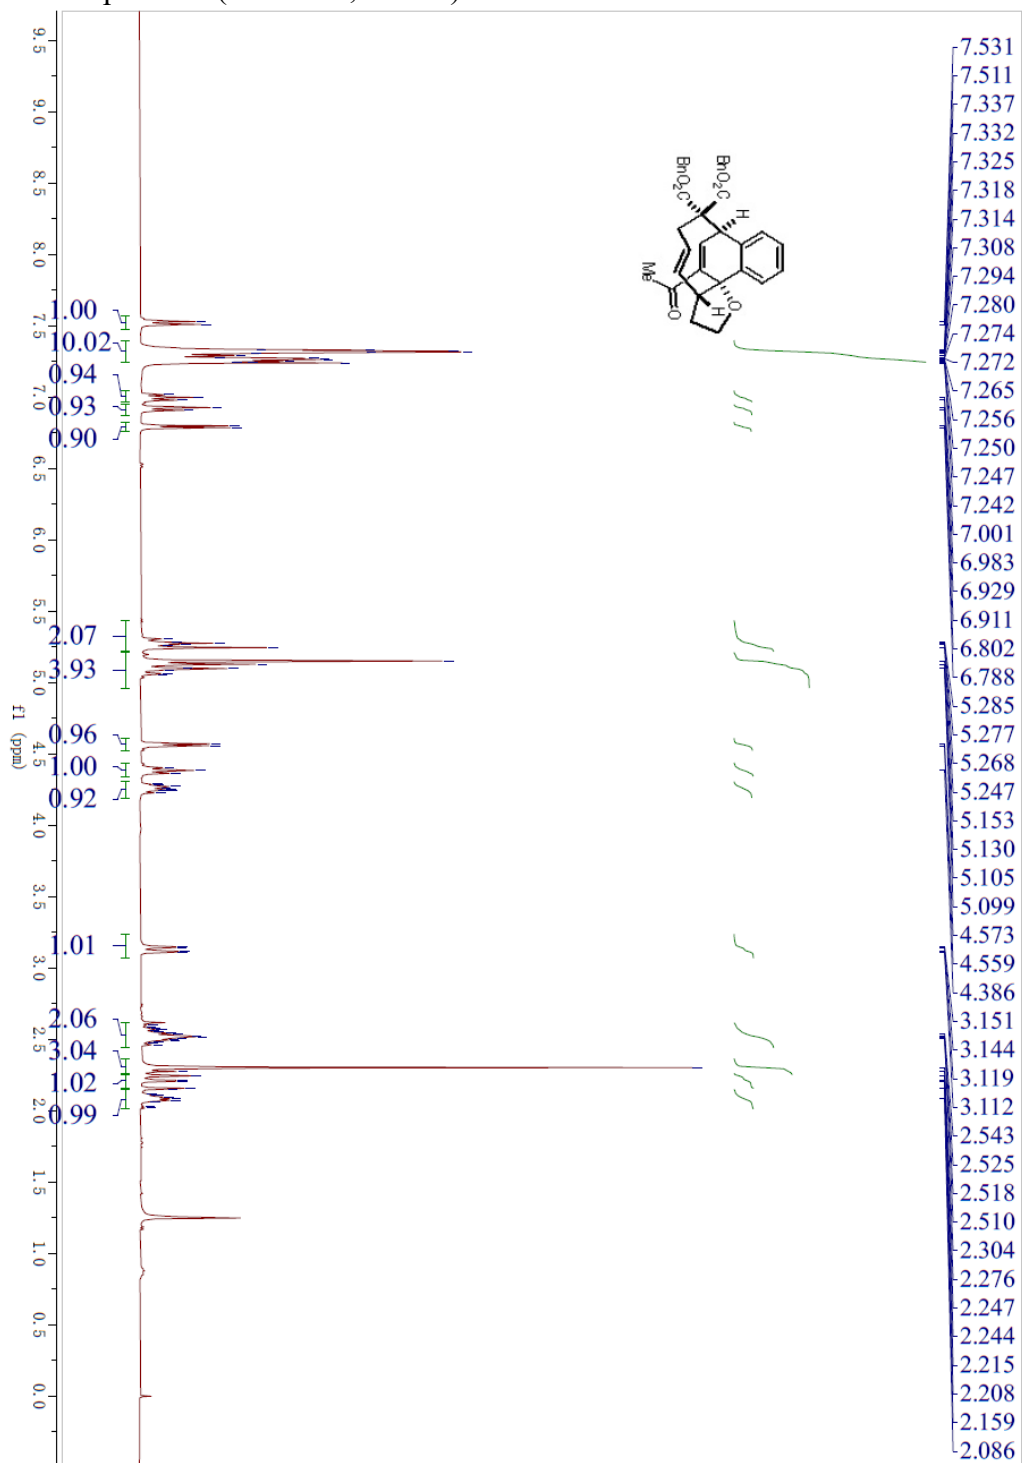

<sup>13</sup>C NMR Spectrum (100 MHz, CDCl<sub>3</sub>) of *E*-2i

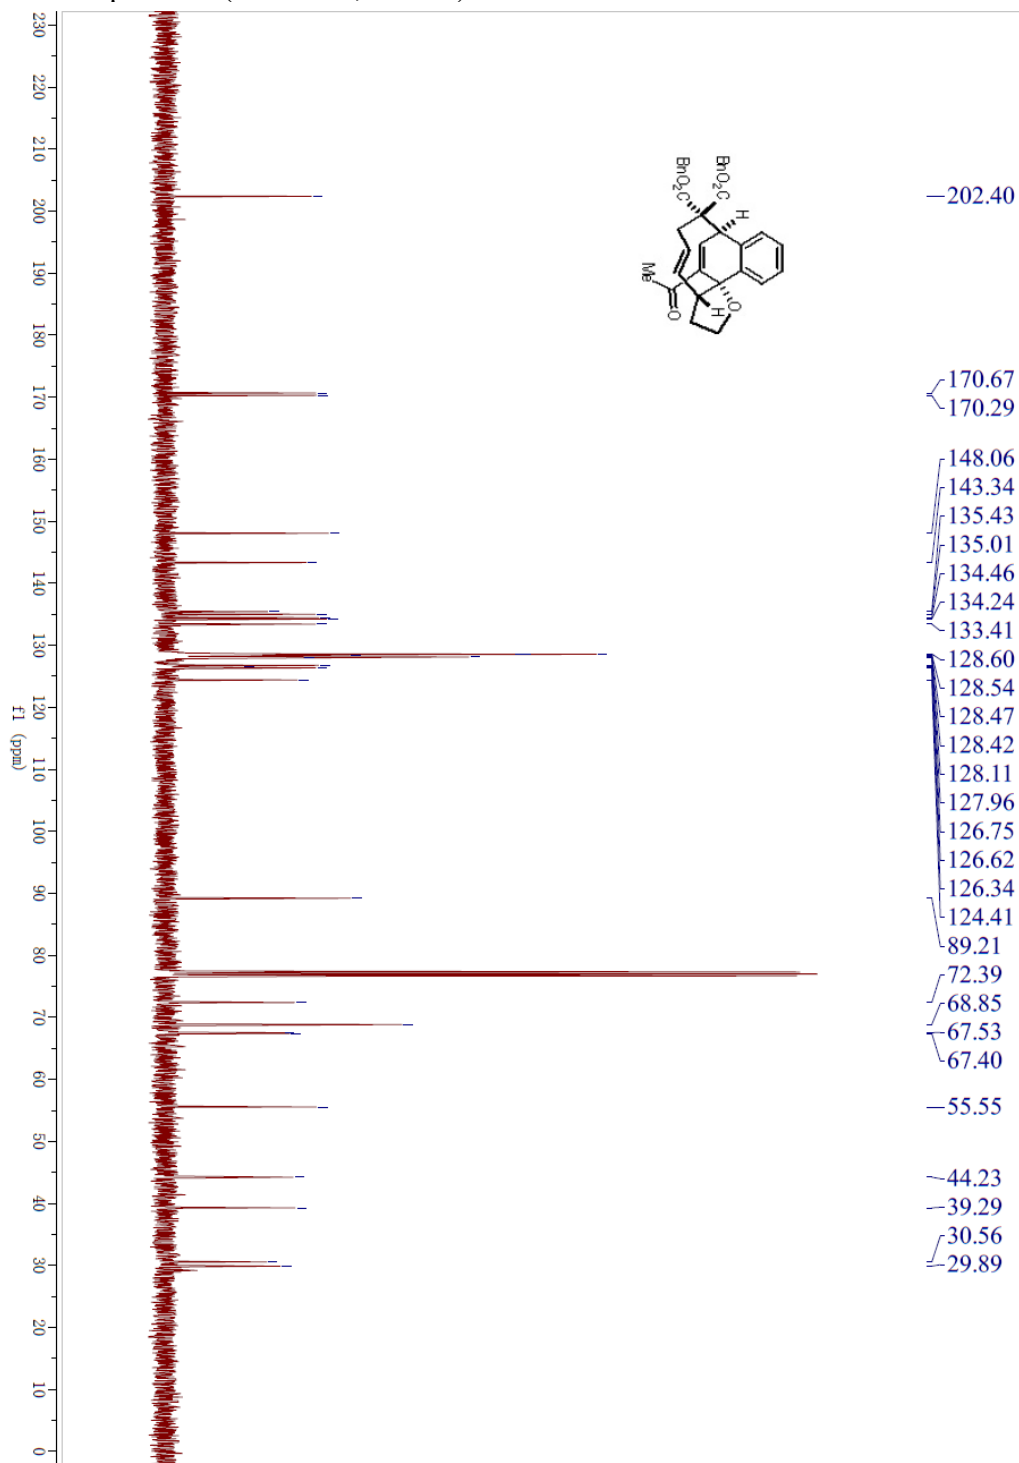

<sup>1</sup>H NMR Spectrum (400 MHz, CDCl<sub>3</sub>) of *E-2j*

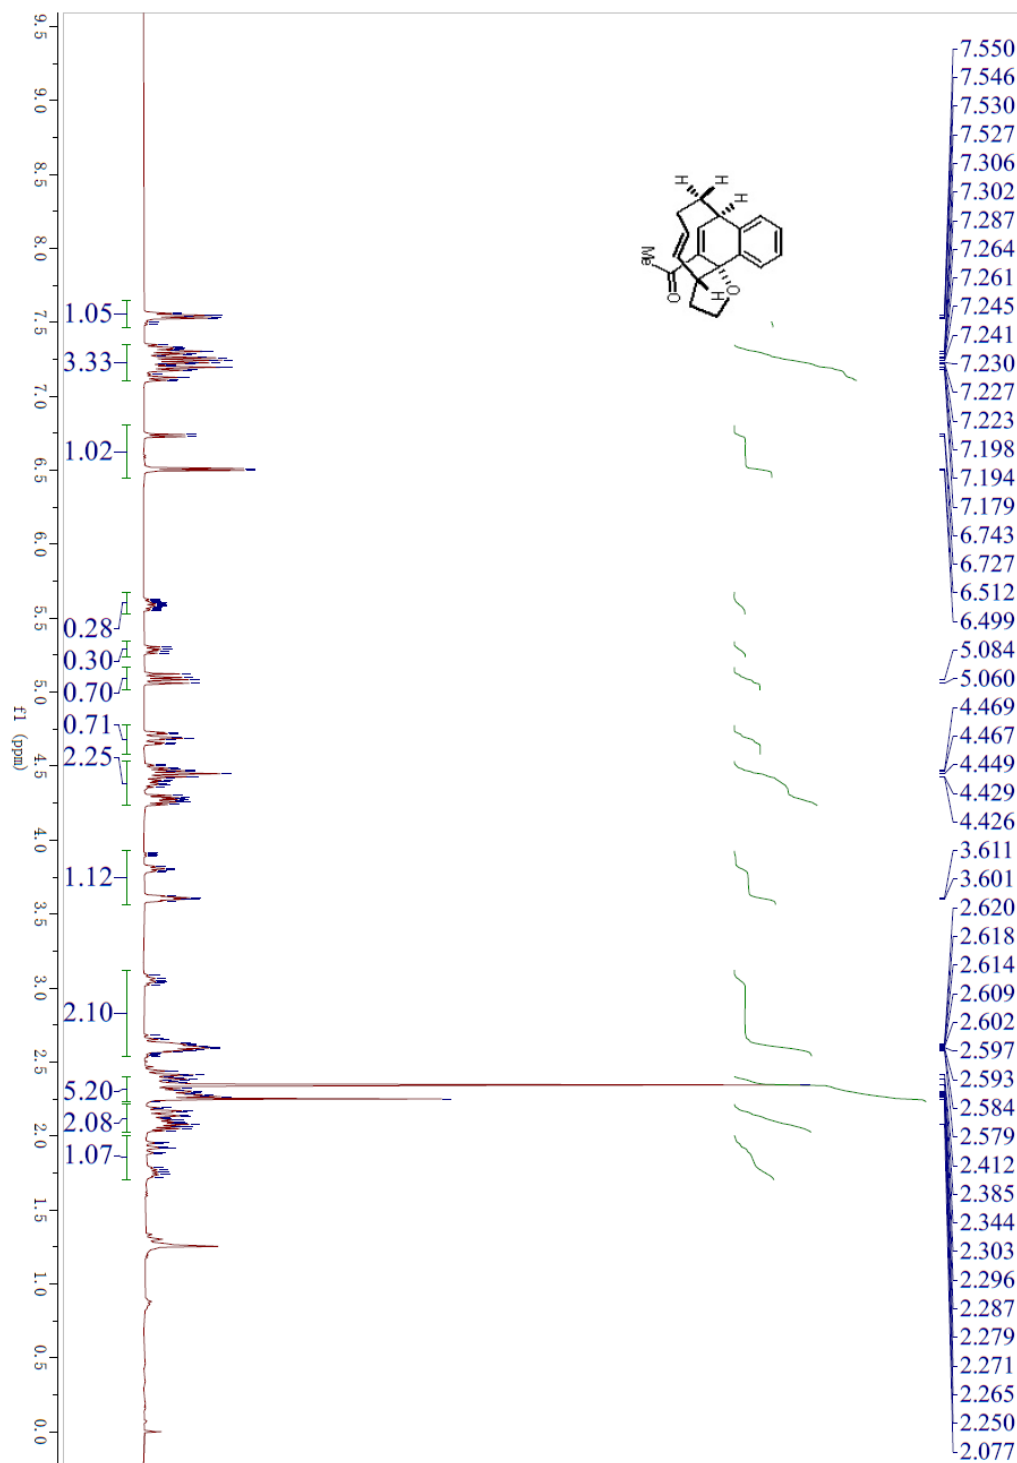

<sup>13</sup>C NMR Spectrum (100 MHz, CDCl<sub>3</sub>) of *E*-2j

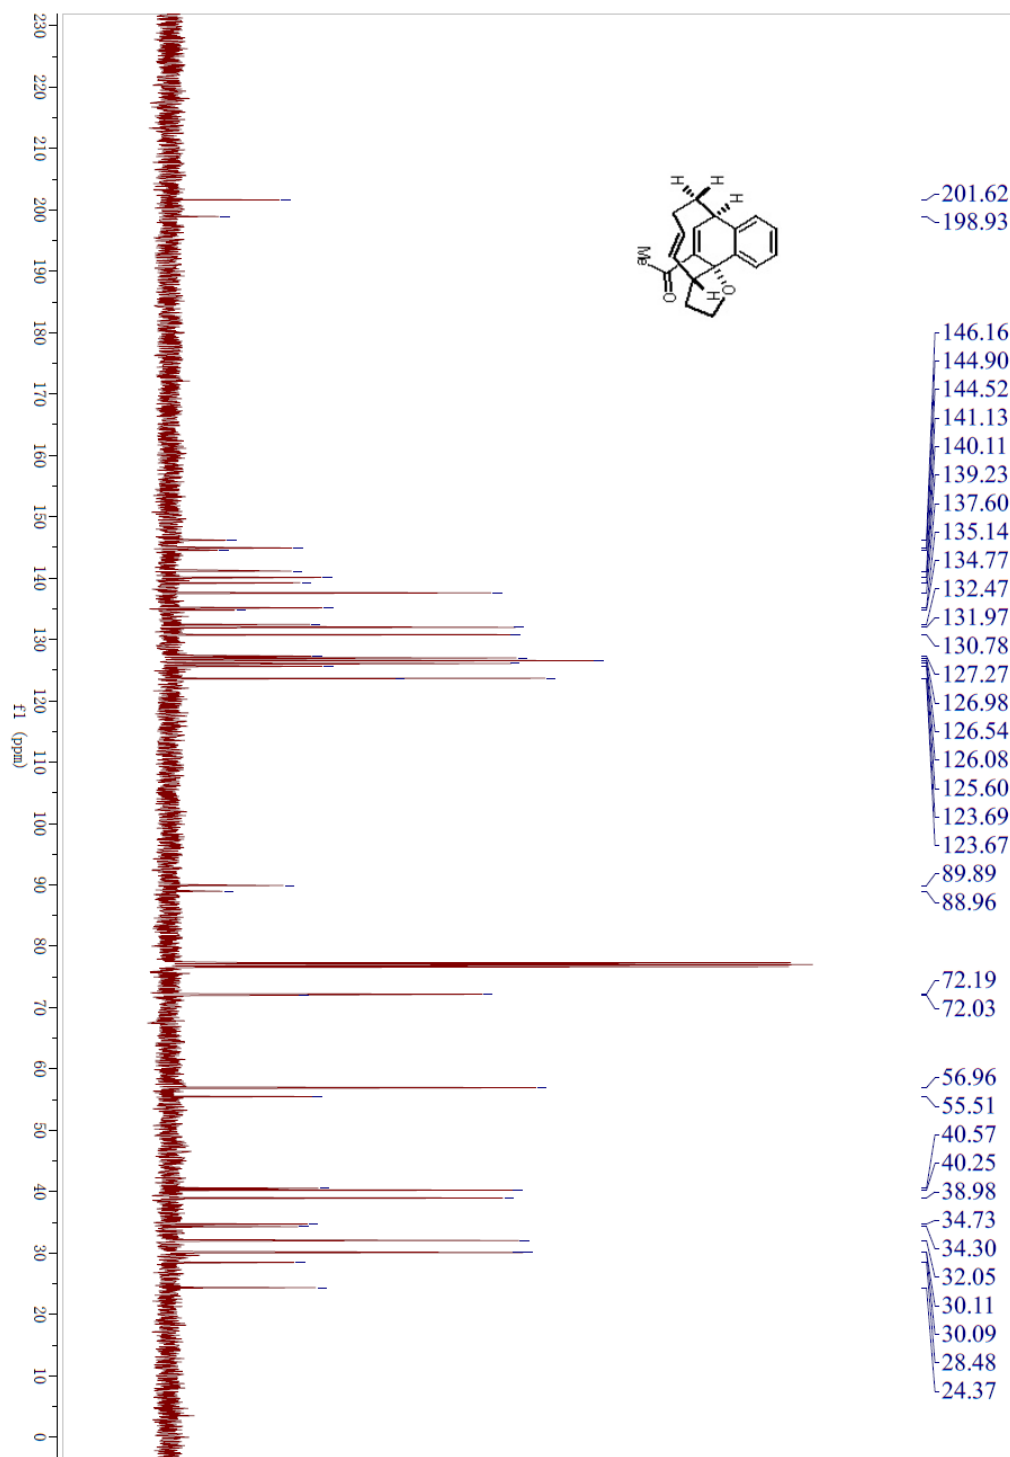

<sup>1</sup>H NMR Spectrum (400 MHz, CDCl<sub>3</sub>) of *E-2k*

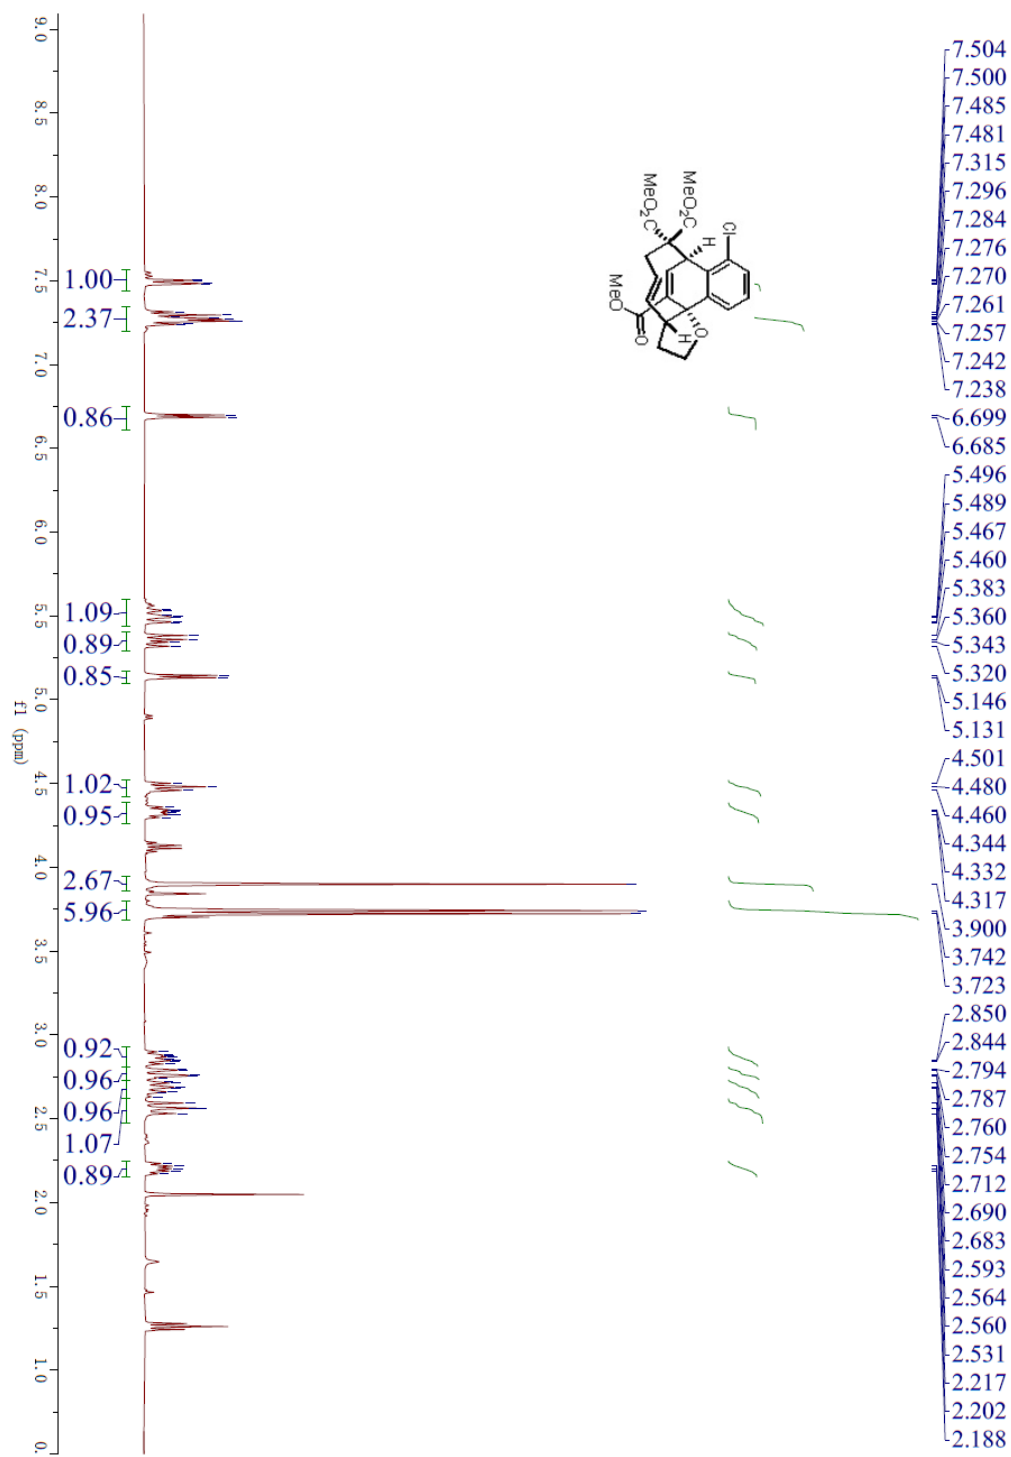

<sup>13</sup>C NMR Spectrum (100 MHz, CDCl<sub>3</sub>) of *E*-2k

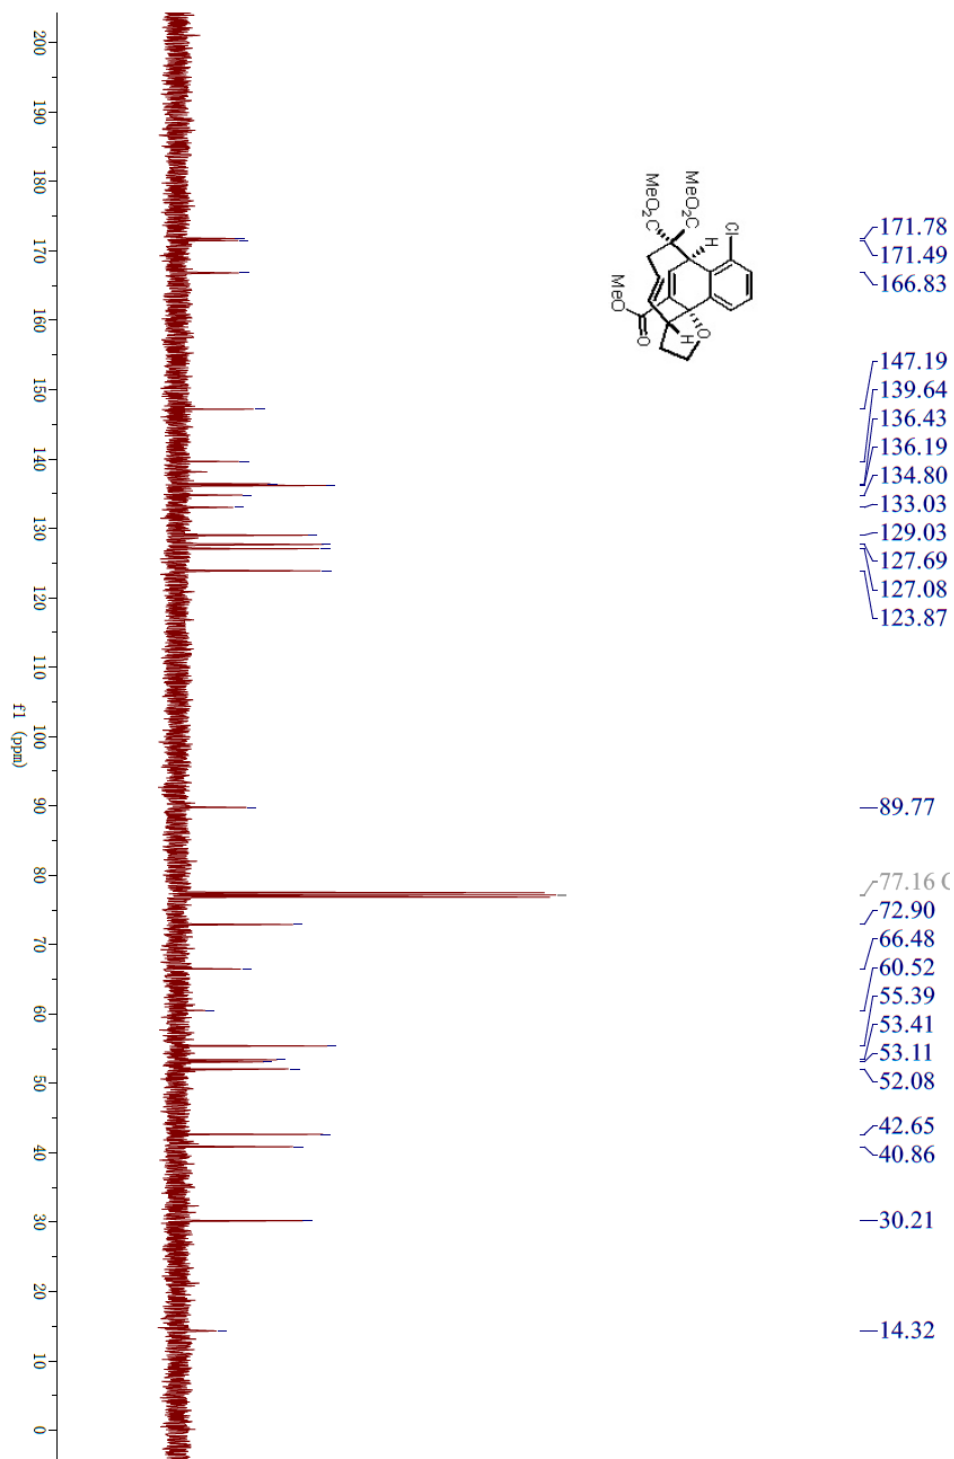

<sup>1</sup>H NMR Spectrum (400 MHz, CDCl<sub>3</sub>) of *E*-21

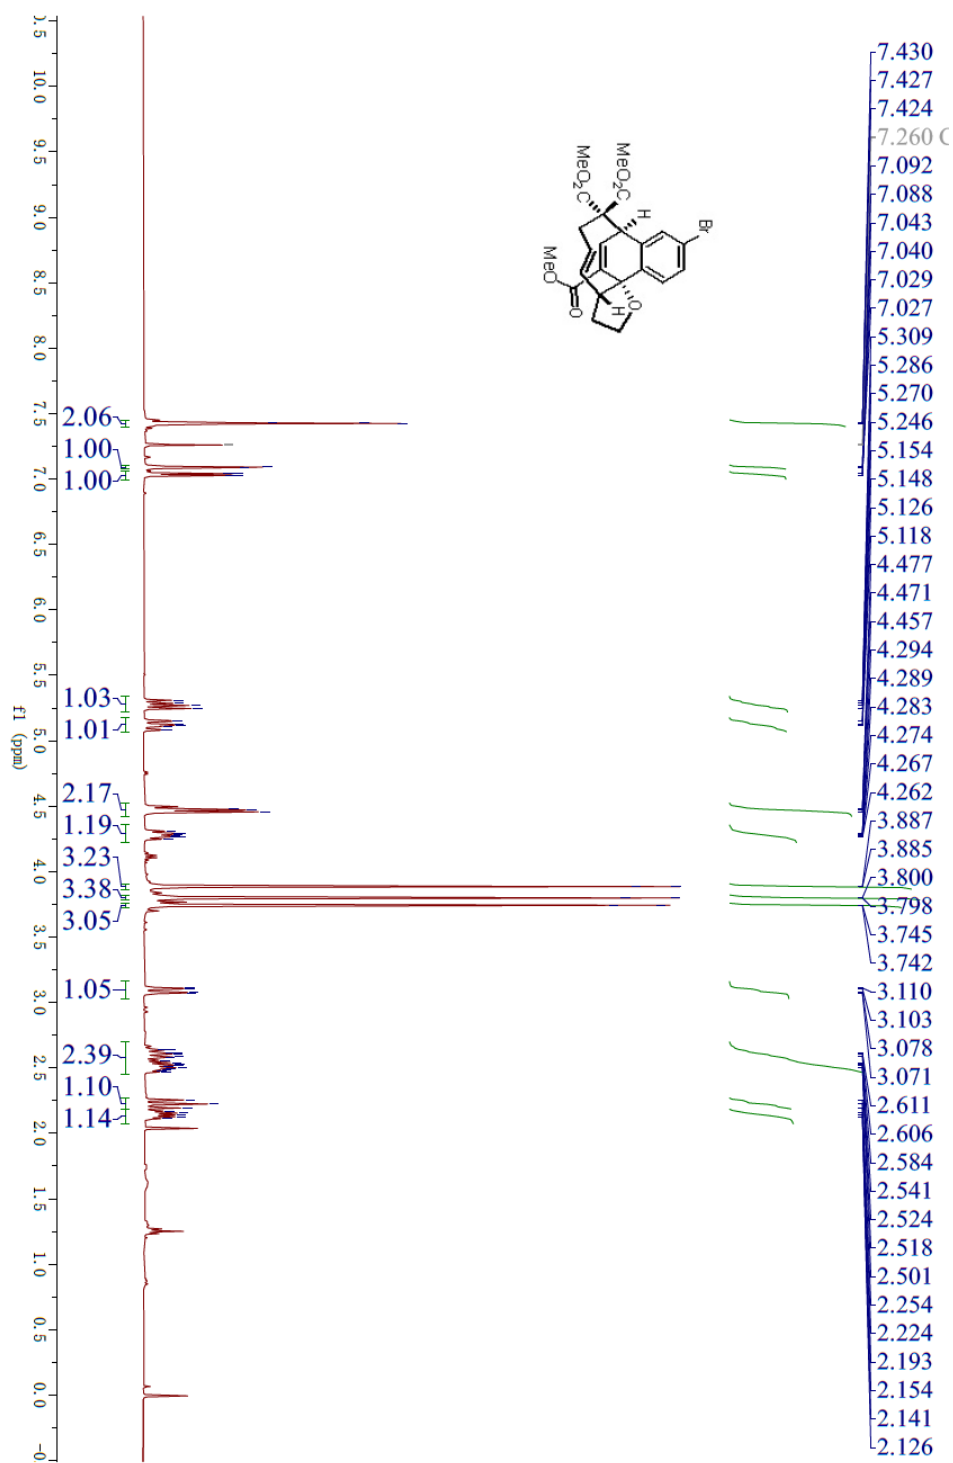

<sup>13</sup>C NMR Spectrum (100 MHz, CDCl<sub>3</sub>) of *E*-21

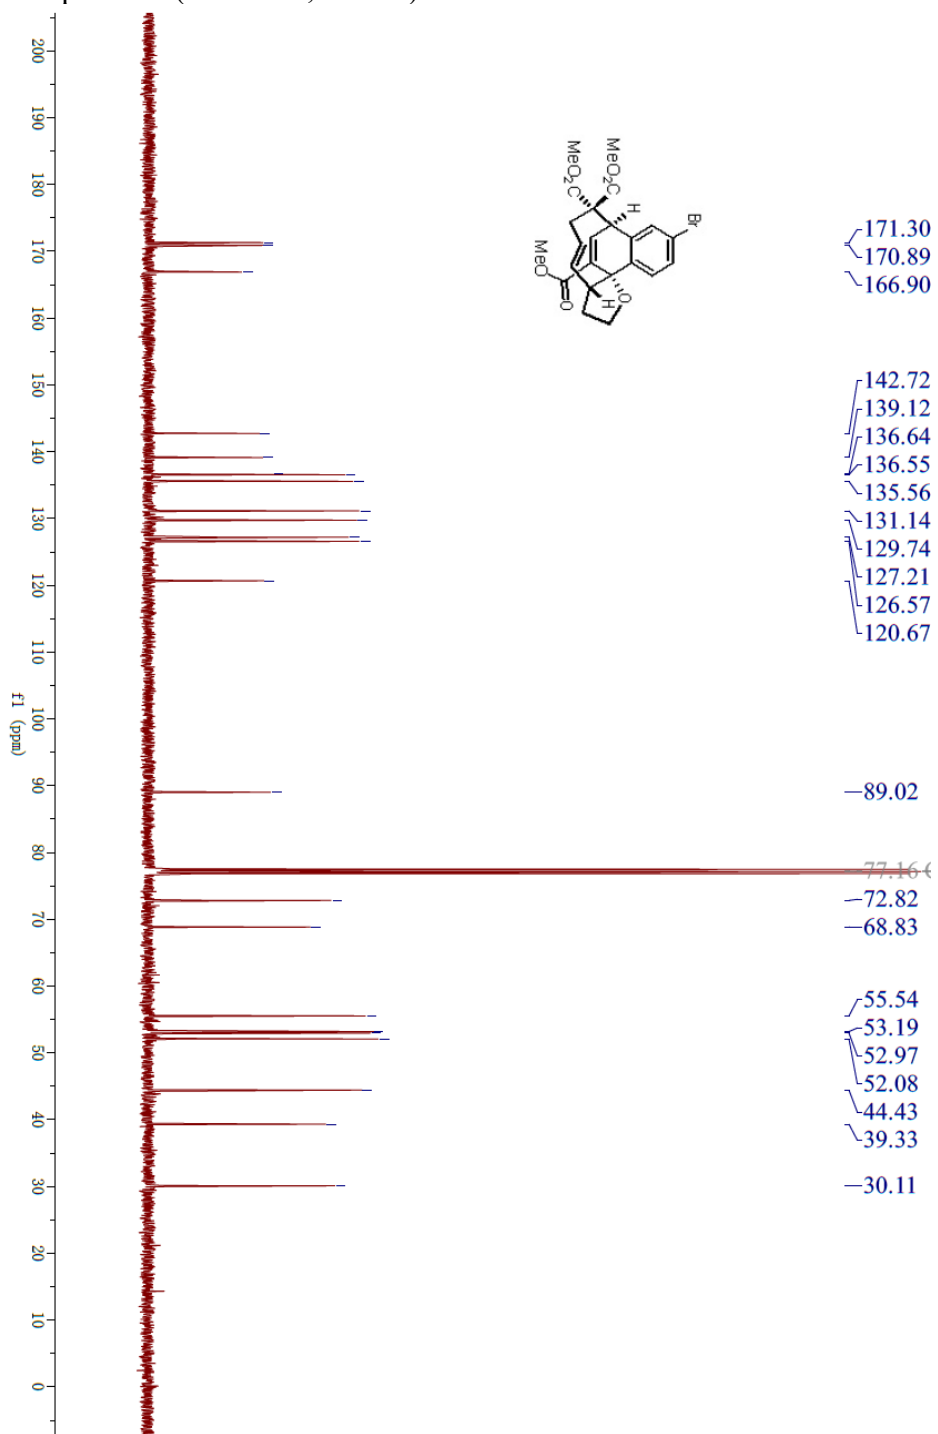



<sup>1</sup>H NMR Spectrum (400 MHz, CDCl<sub>3</sub>) of *E*-2m

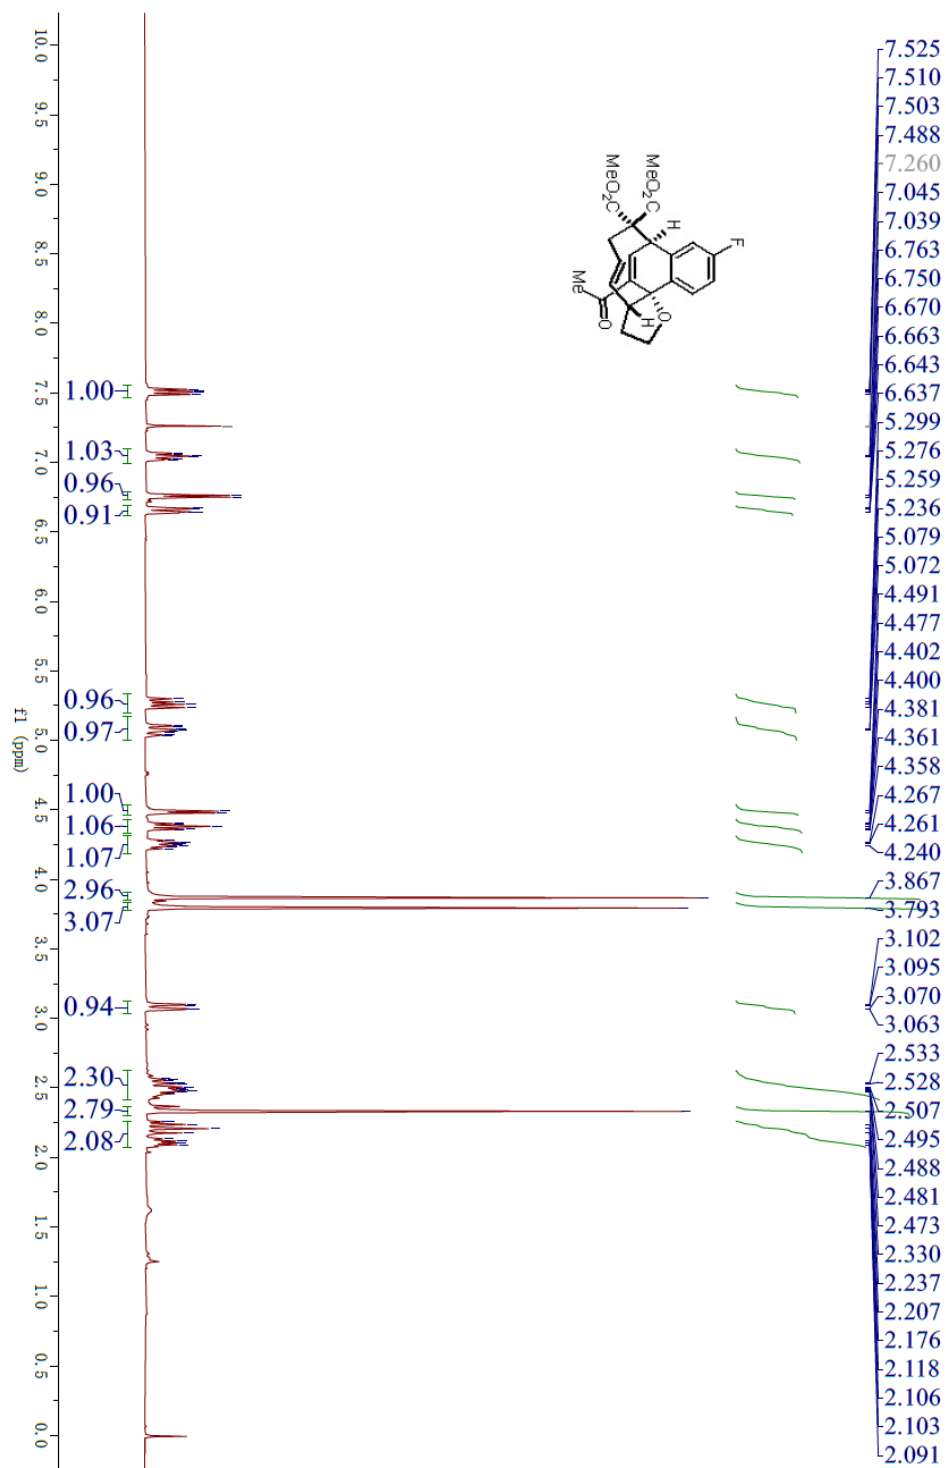

<sup>13</sup>C NMR Spectrum (100 MHz, CDCl<sub>3</sub>) of *E-2m*

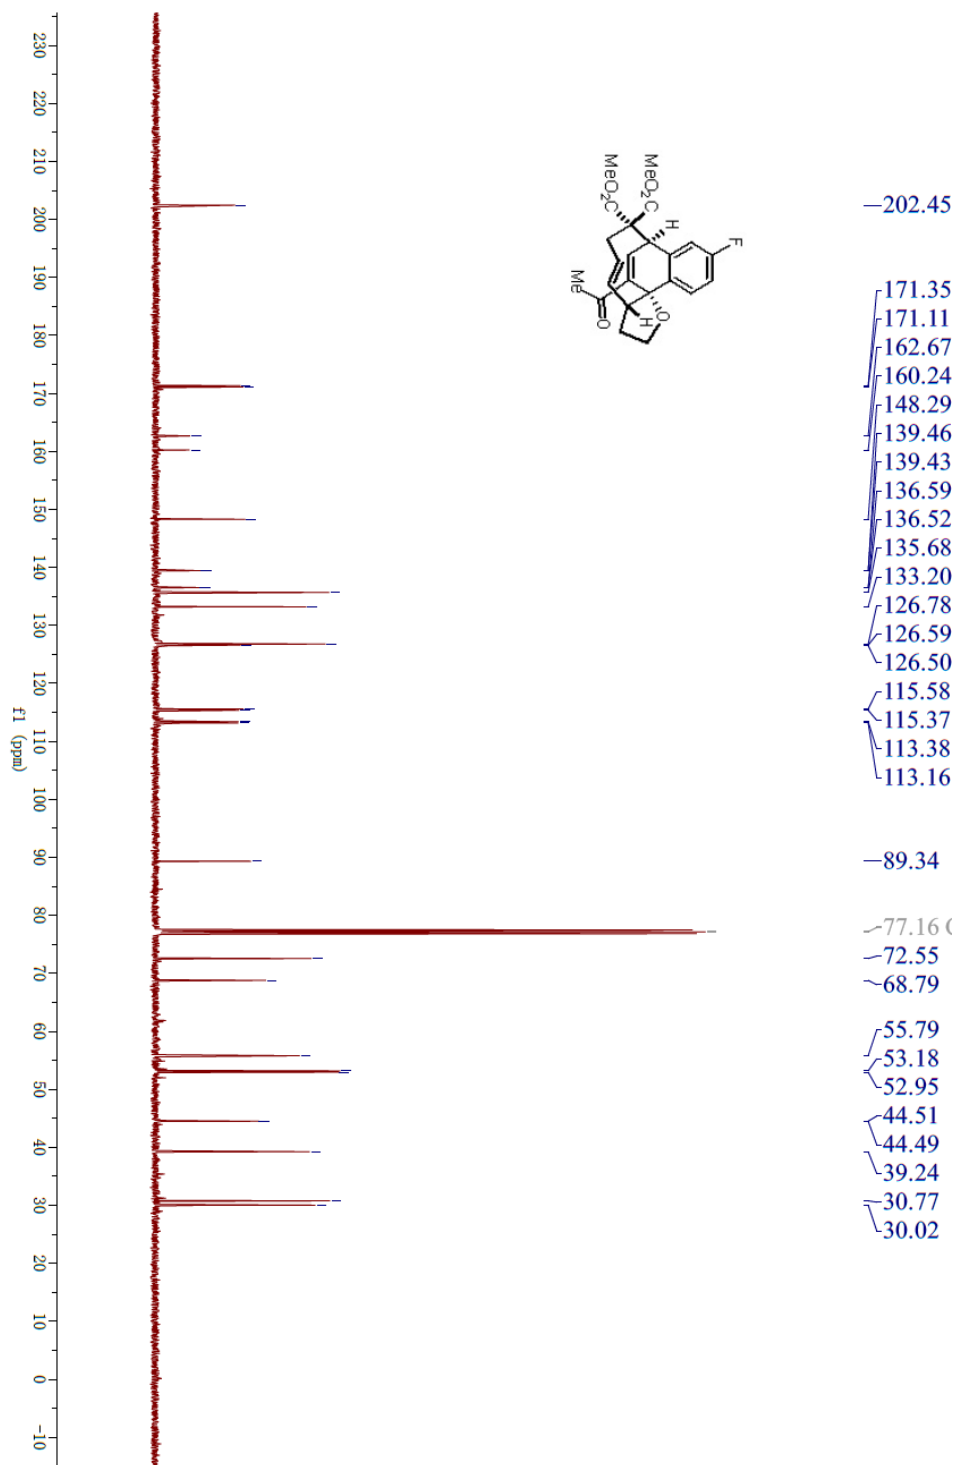

<sup>19</sup>F NMR Spectrum (376 MHz, CDCl<sub>3</sub>) of *E-2m*

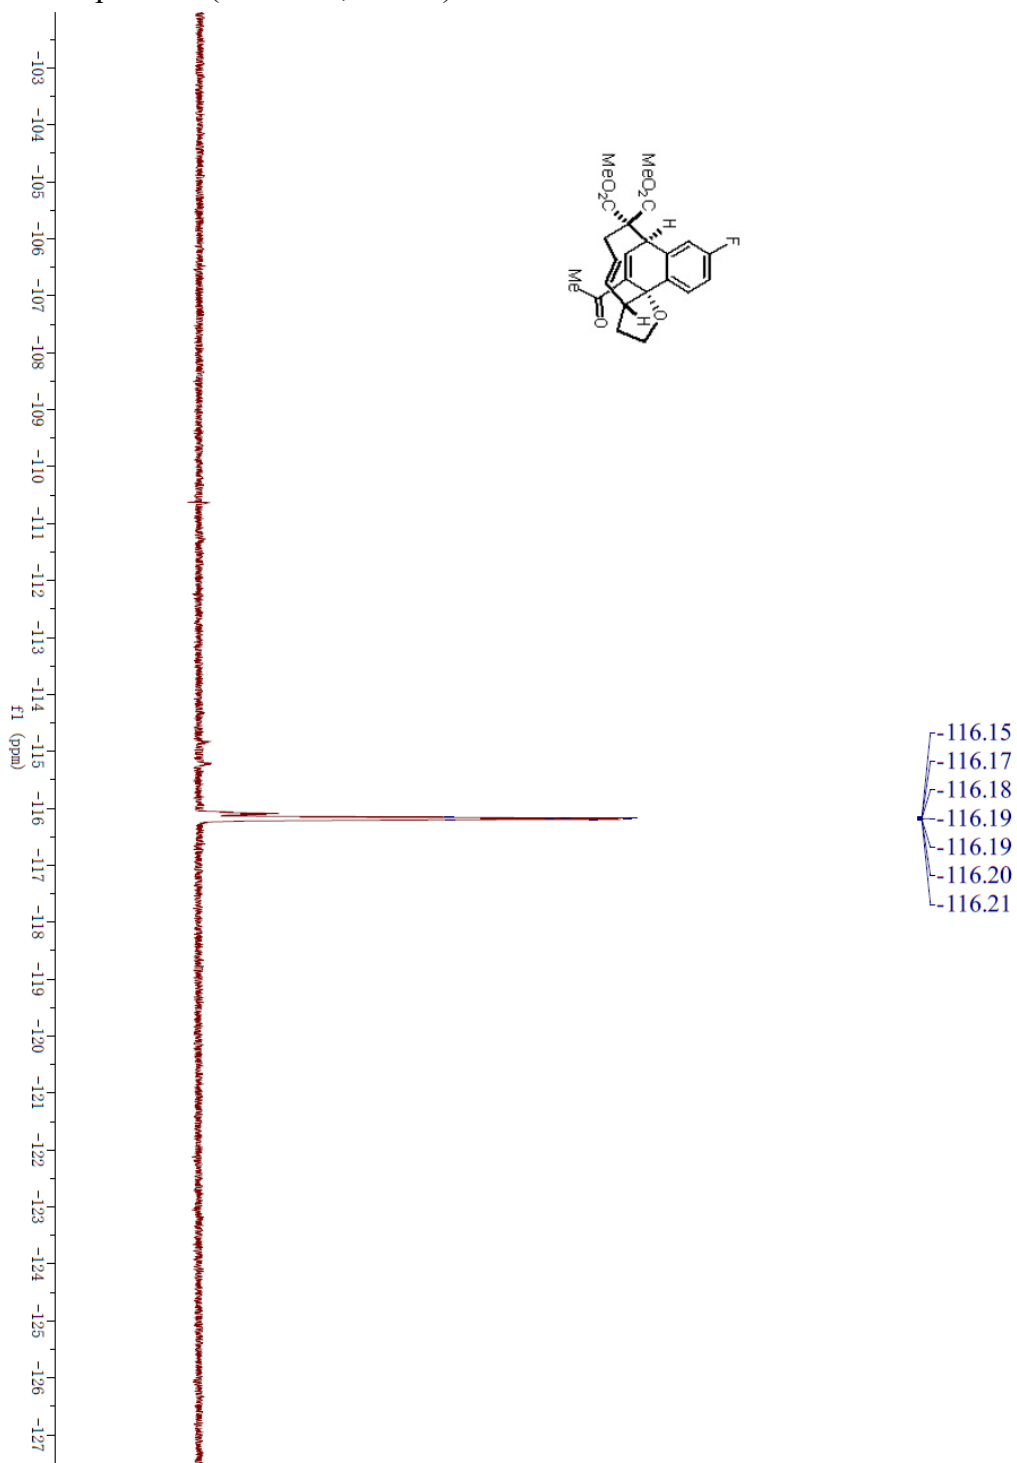

<sup>1</sup>H NMR Spectrum (400 MHz, CDCl<sub>3</sub>) of *E*-2n

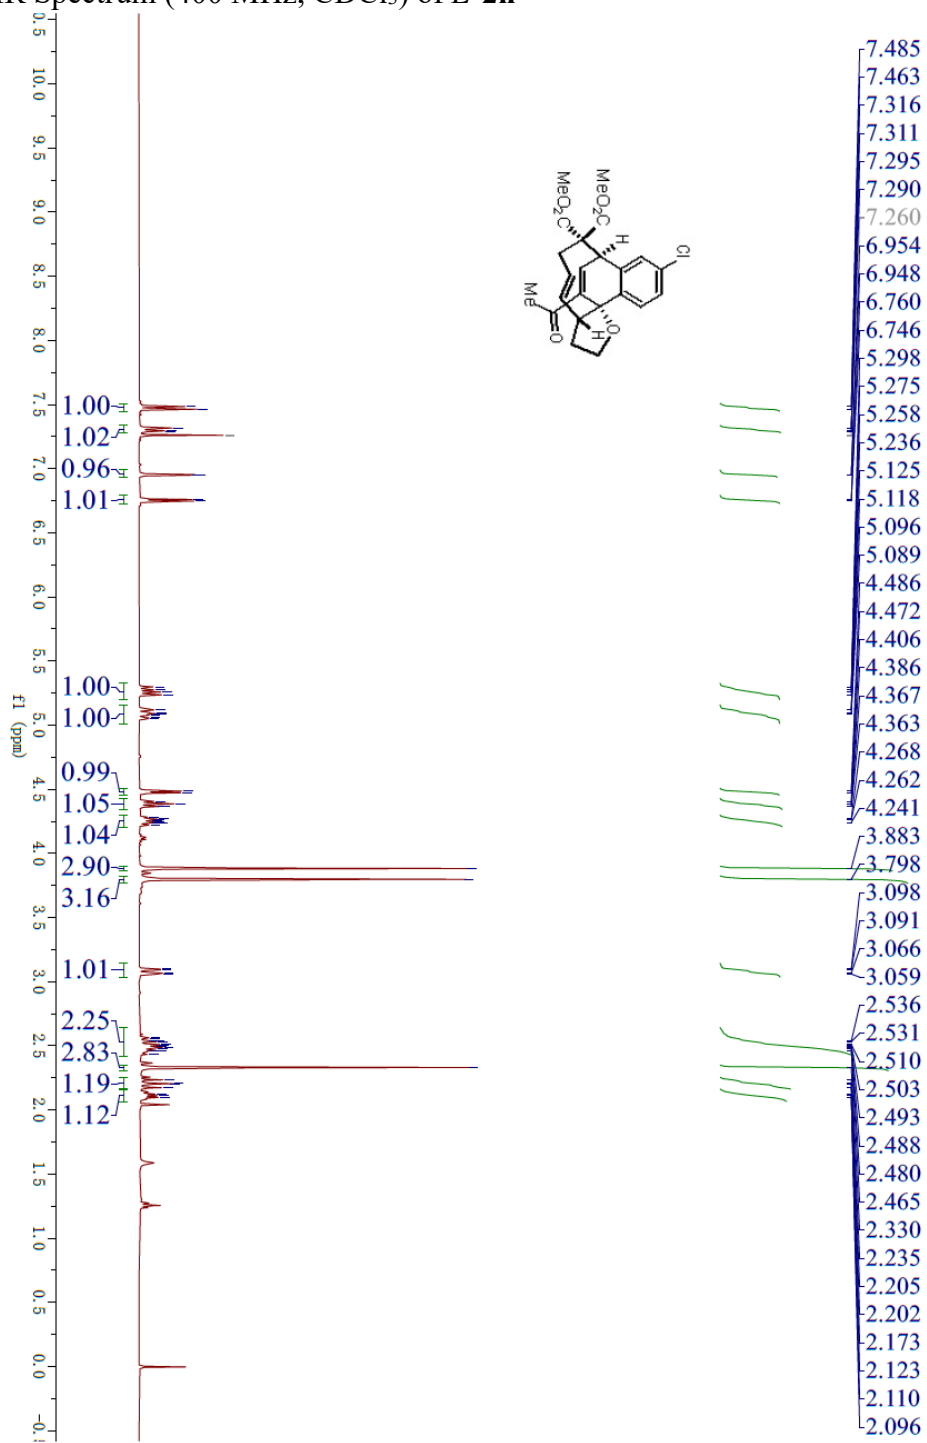

<sup>13</sup>C NMR Spectrum (100 MHz, CDCl<sub>3</sub>) of *E*-2n

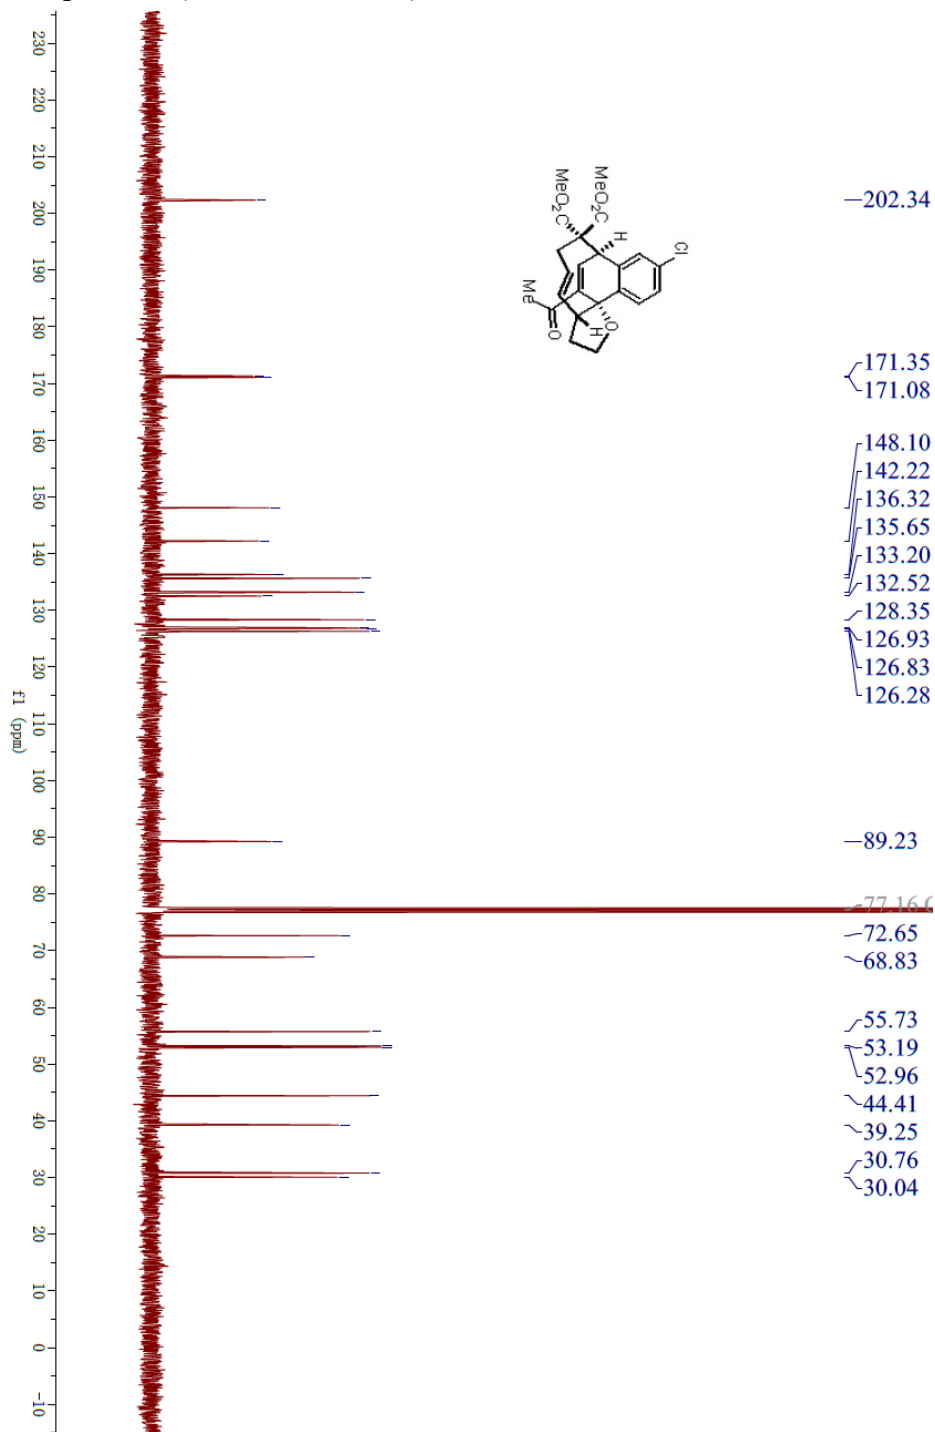

<sup>1</sup>H NMR Spectrum (400 MHz, CDCl<sub>3</sub>) of *E*-2o

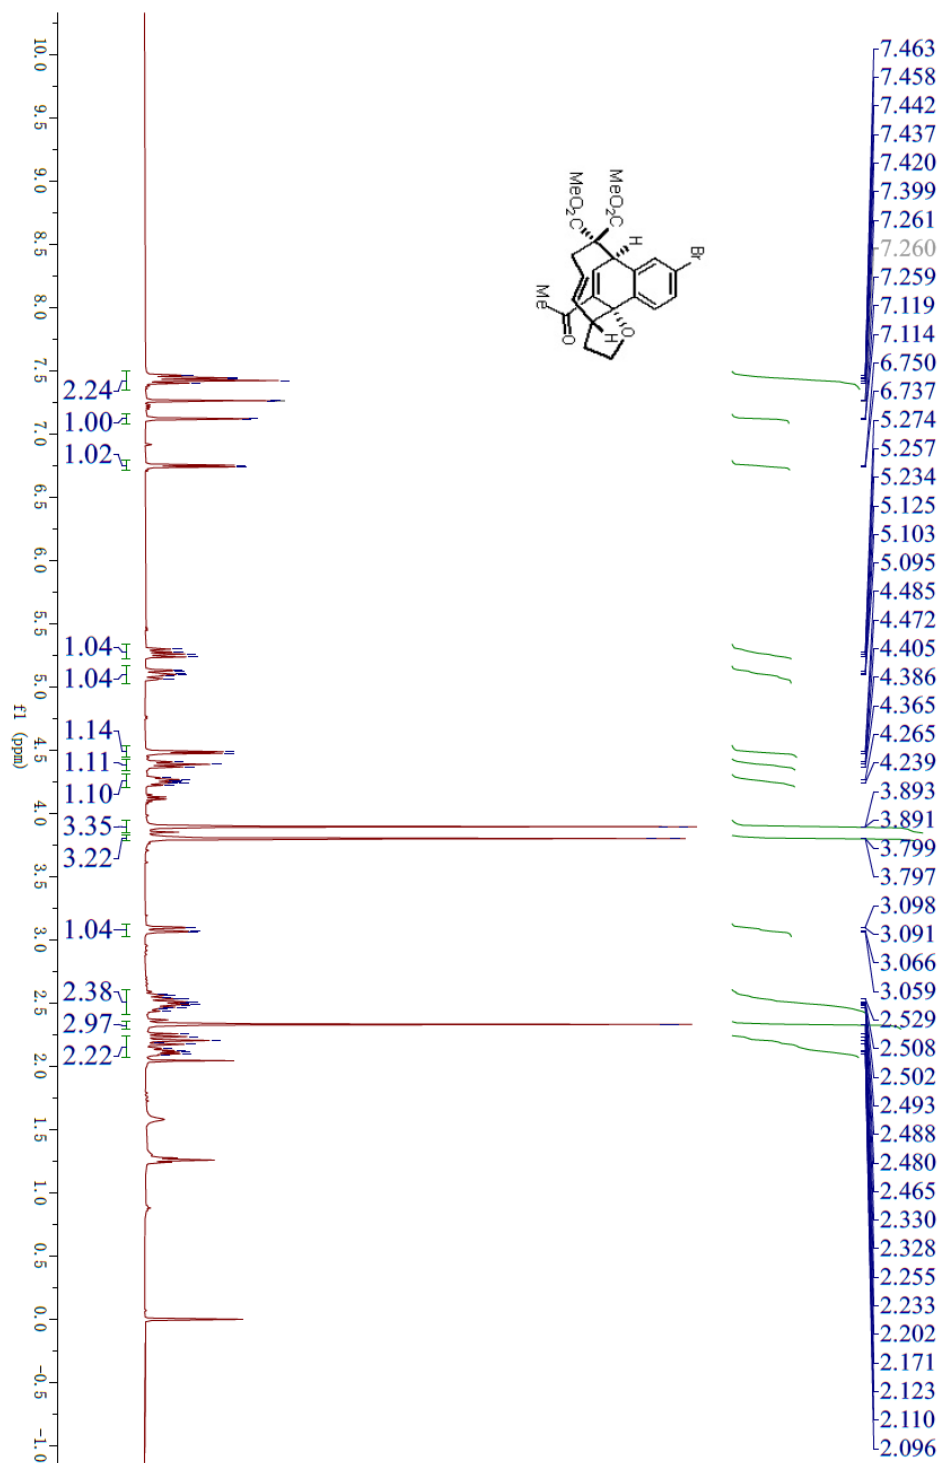

<sup>13</sup>C NMR Spectrum (100 MHz, CDCl<sub>3</sub>) of *E*-2o

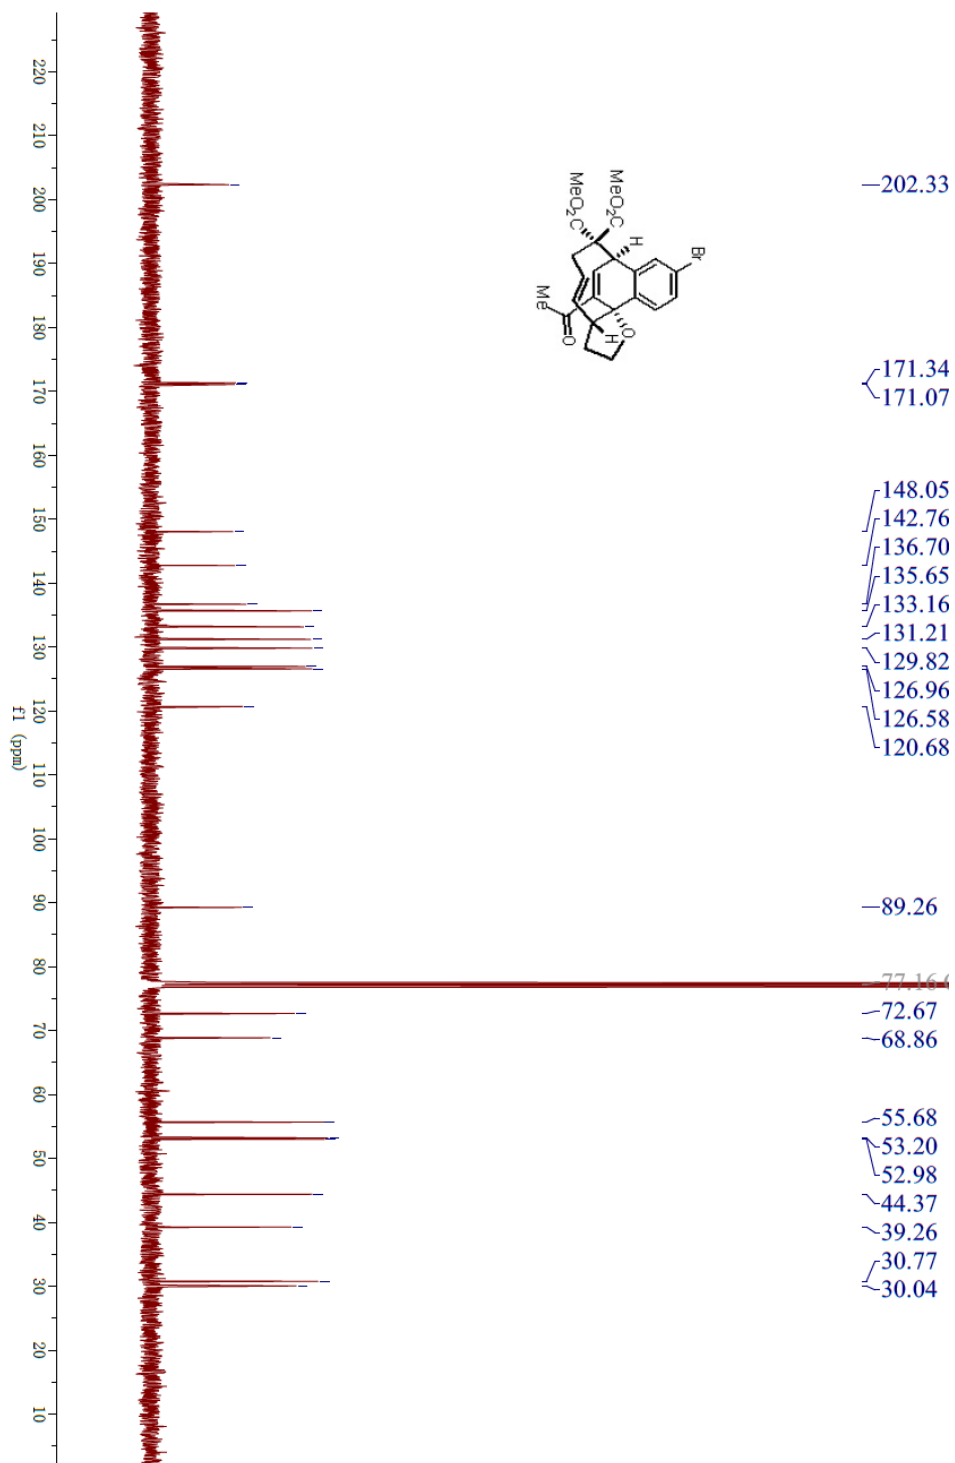

$^1\text{H}$  NMR Spectrum (400 MHz,  $\text{CDCl}_3$ ) of *E*-2p

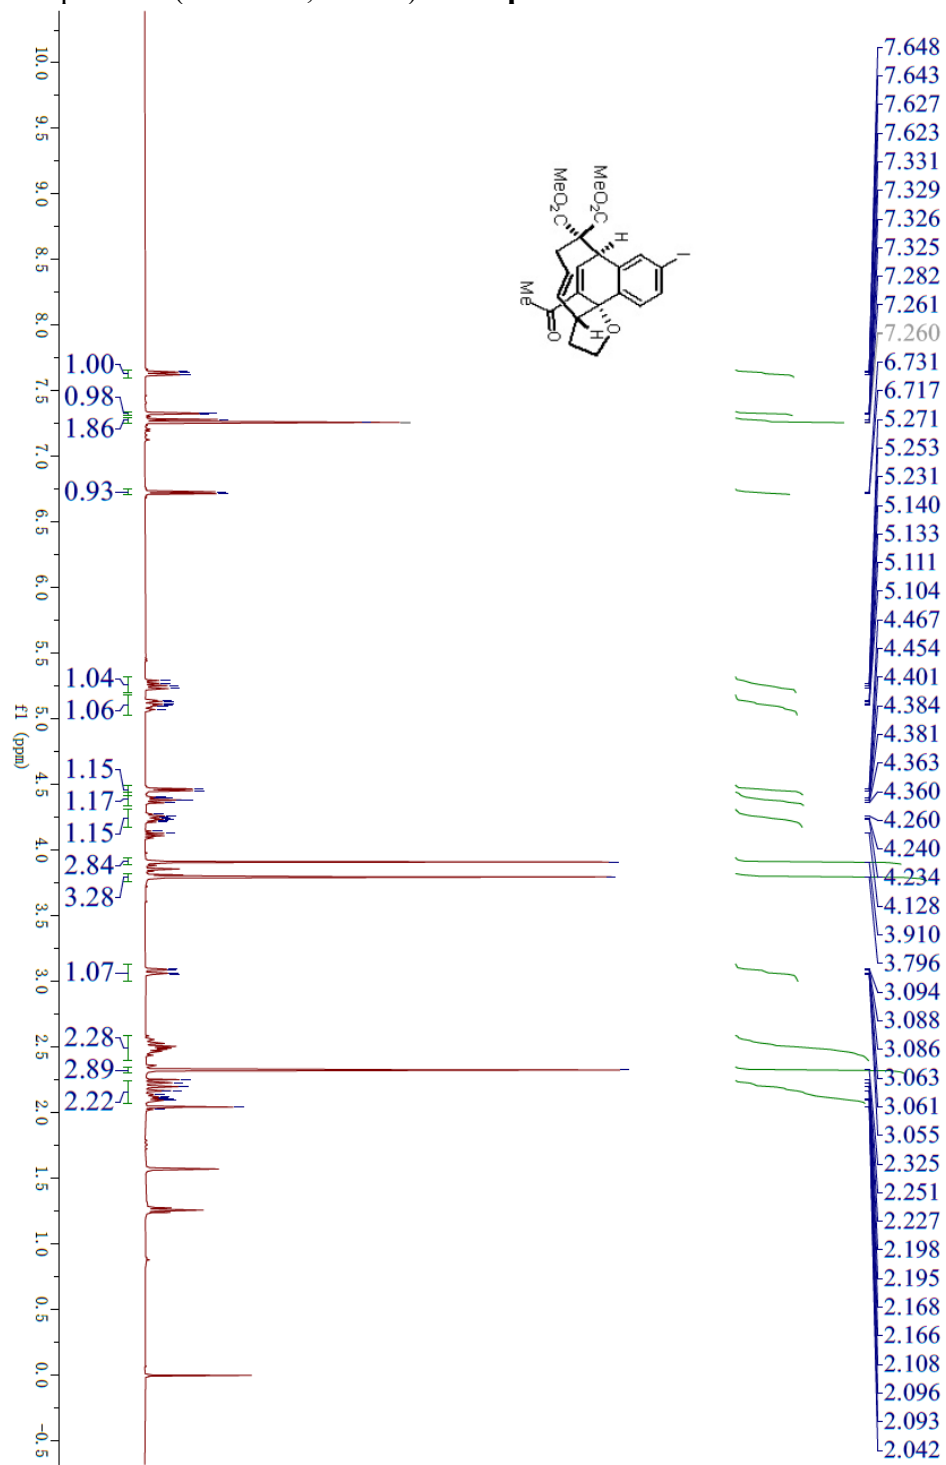



<sup>13</sup>C NMR Spectrum (100 MHz, CDCl<sub>3</sub>) of *E*-2p

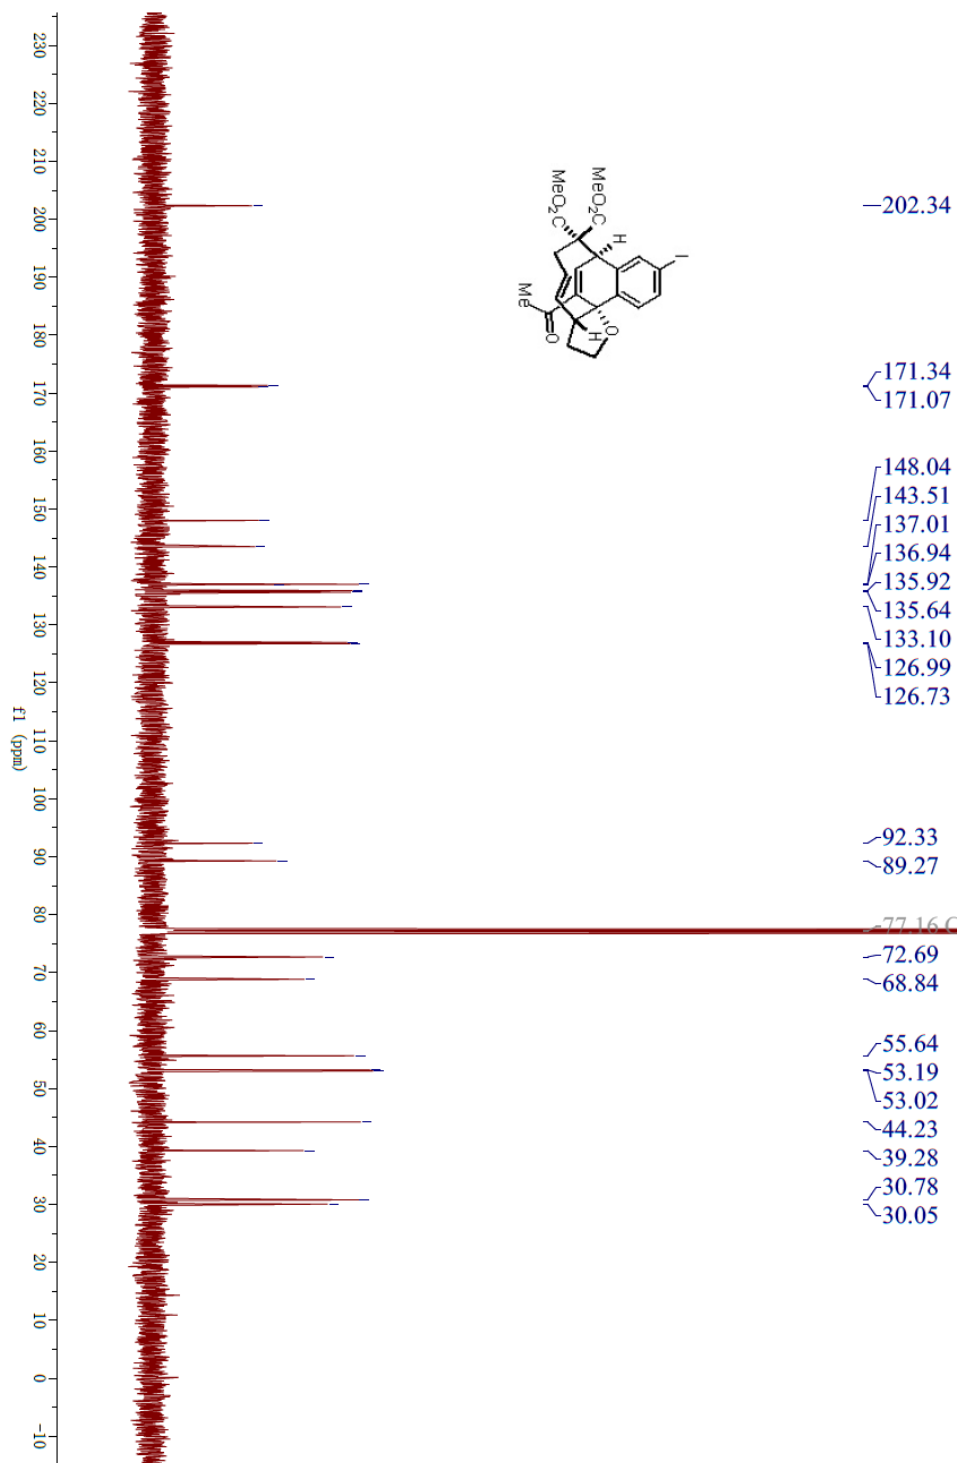

<sup>1</sup>H NMR Spectrum (400 MHz, CDCl<sub>3</sub>) of *E*-2q

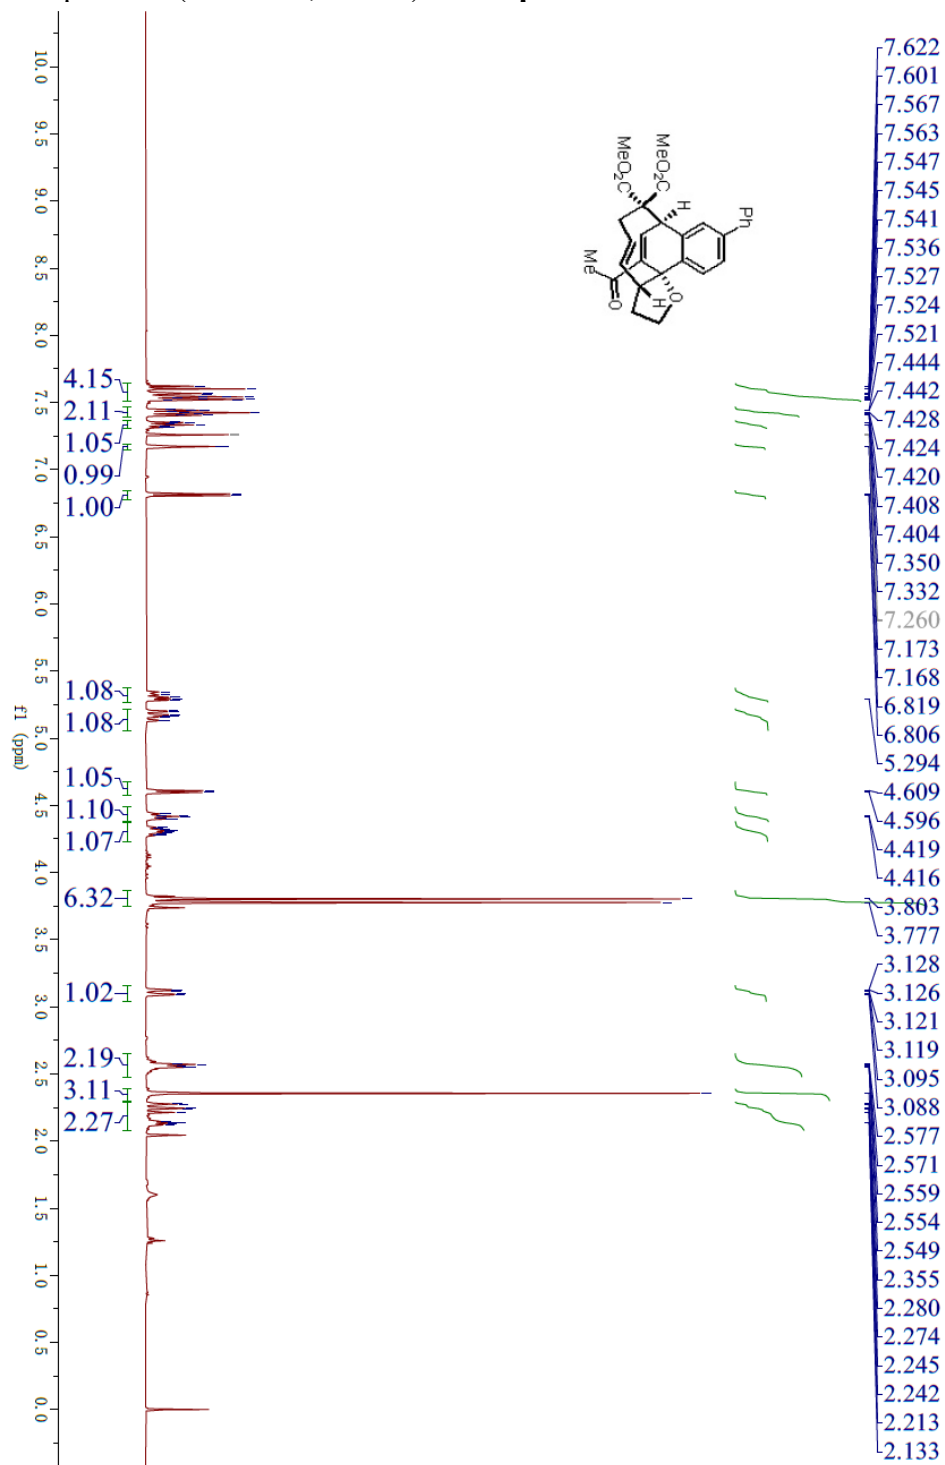

<sup>13</sup>C NMR Spectrum (100 MHz, CDCl<sub>3</sub>) of *E*-2q

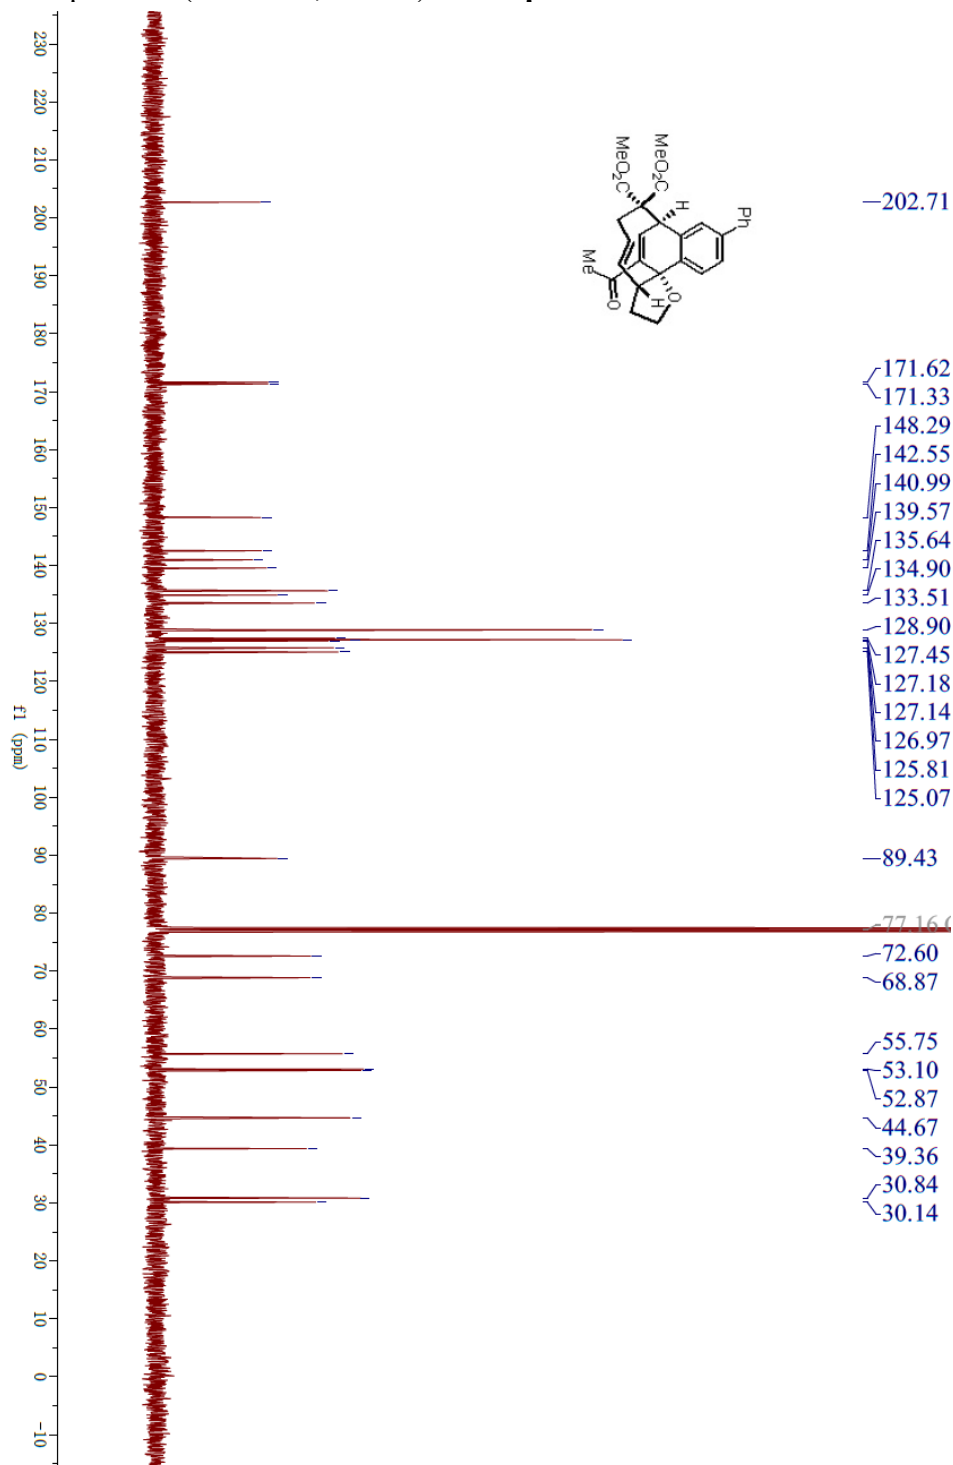

<sup>1</sup>H NMR Spectrum (400 MHz, CDCl<sub>3</sub>) of *E*-2r

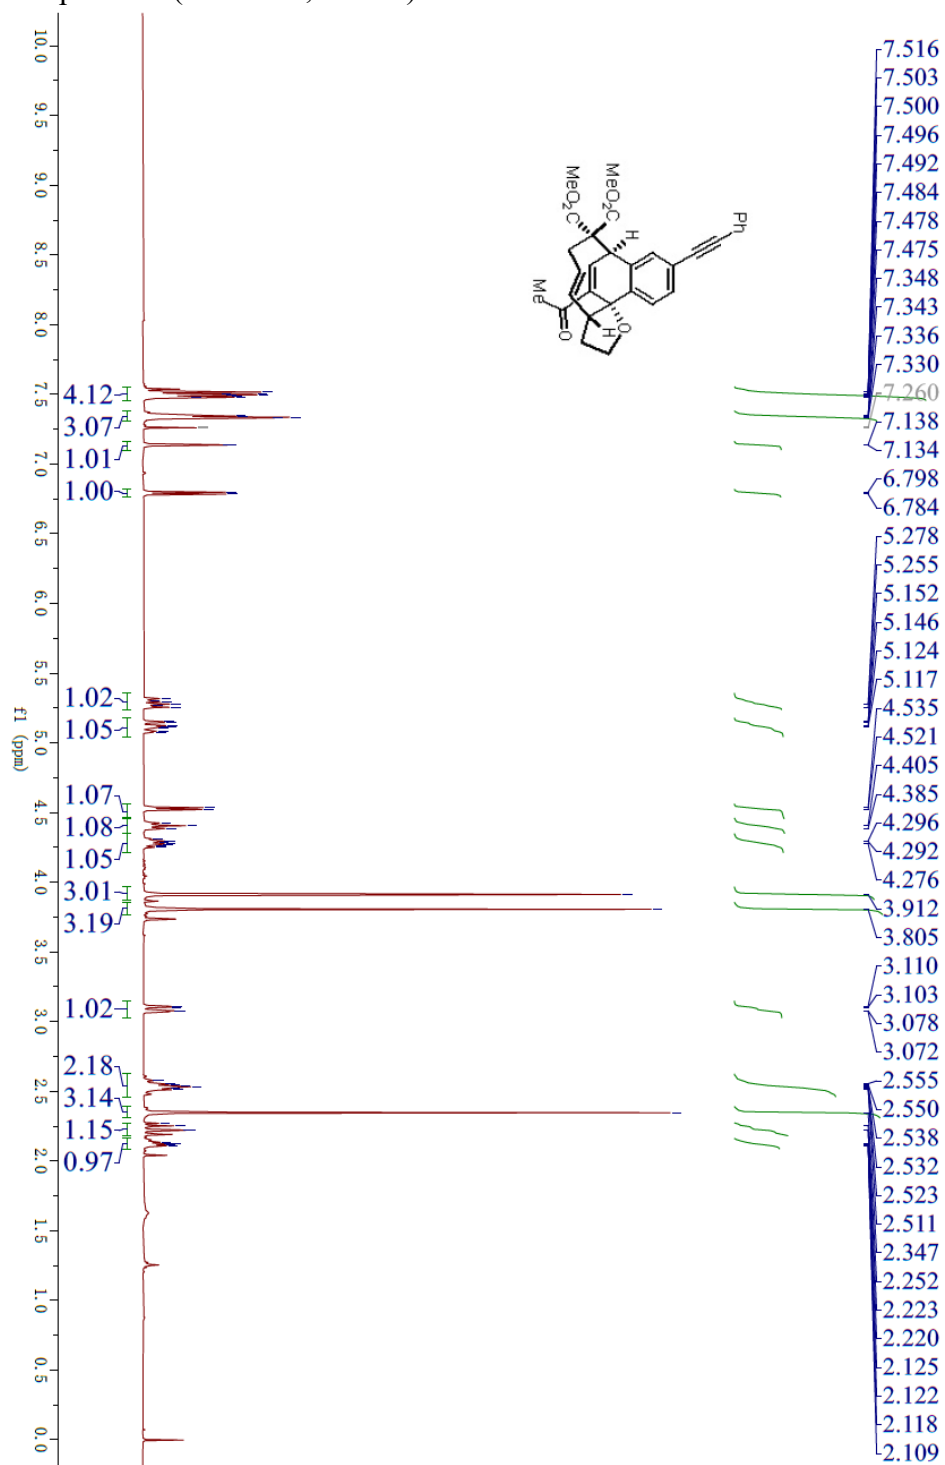

<sup>13</sup>C NMR Spectrum (100 MHz, CDCl<sub>3</sub>) of *E*-2r

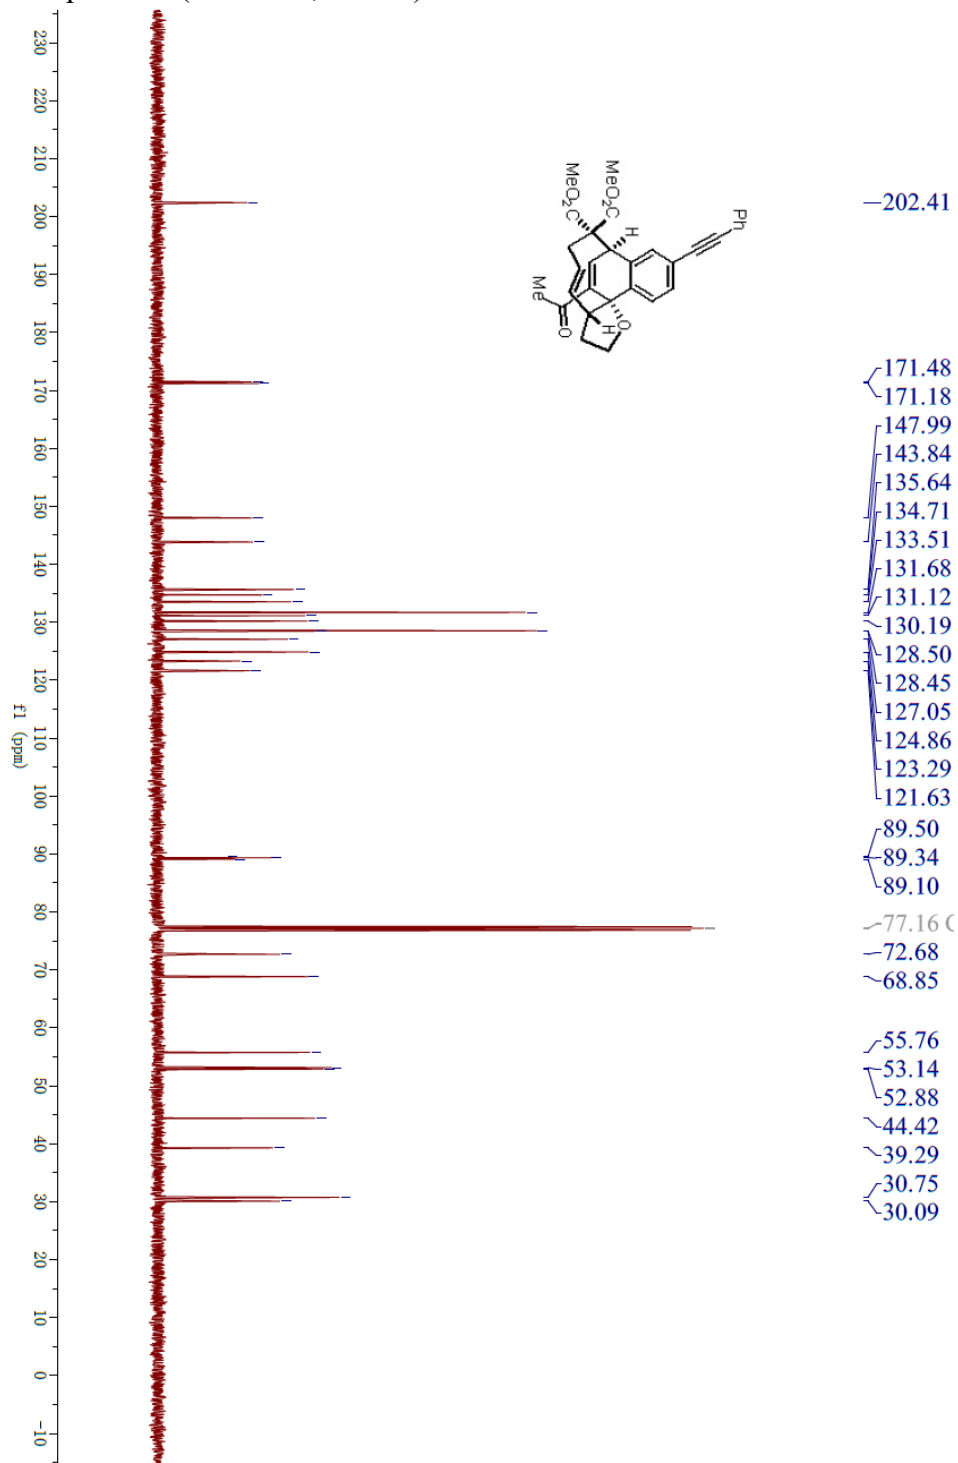

<sup>1</sup>H NMR Spectrum (400 MHz, CDCl<sub>3</sub>) of *E*-2s

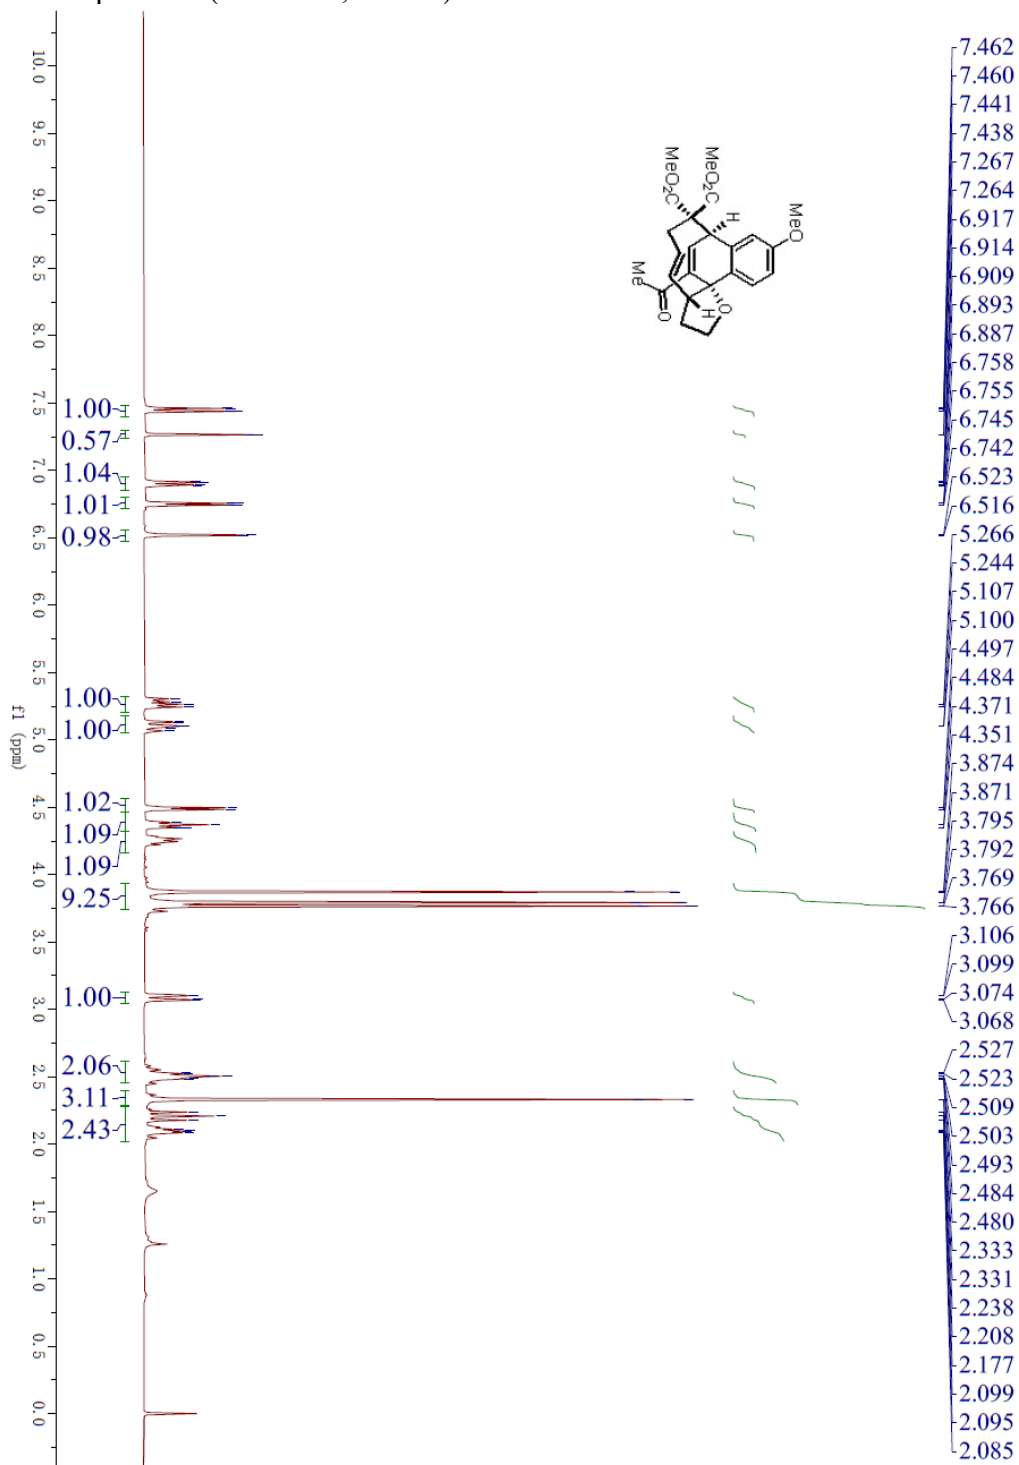

<sup>13</sup>C NMR Spectrum (100 MHz, CDCl<sub>3</sub>) of *E*-2s

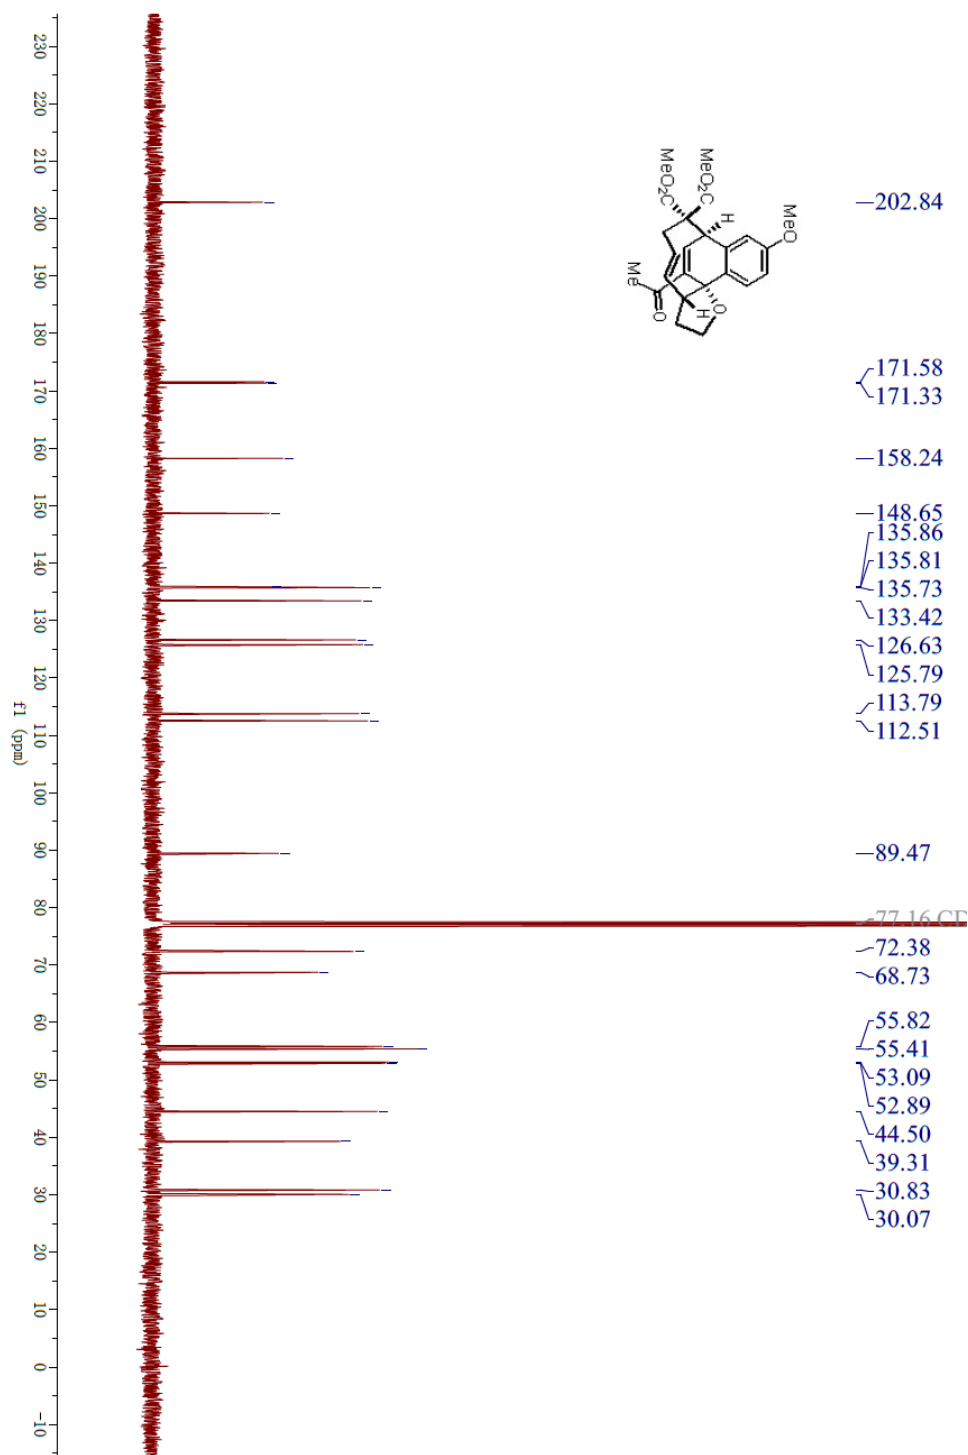

<sup>1</sup>H NMR Spectrum (400 MHz, CDCl<sub>3</sub>) of *E*-2t

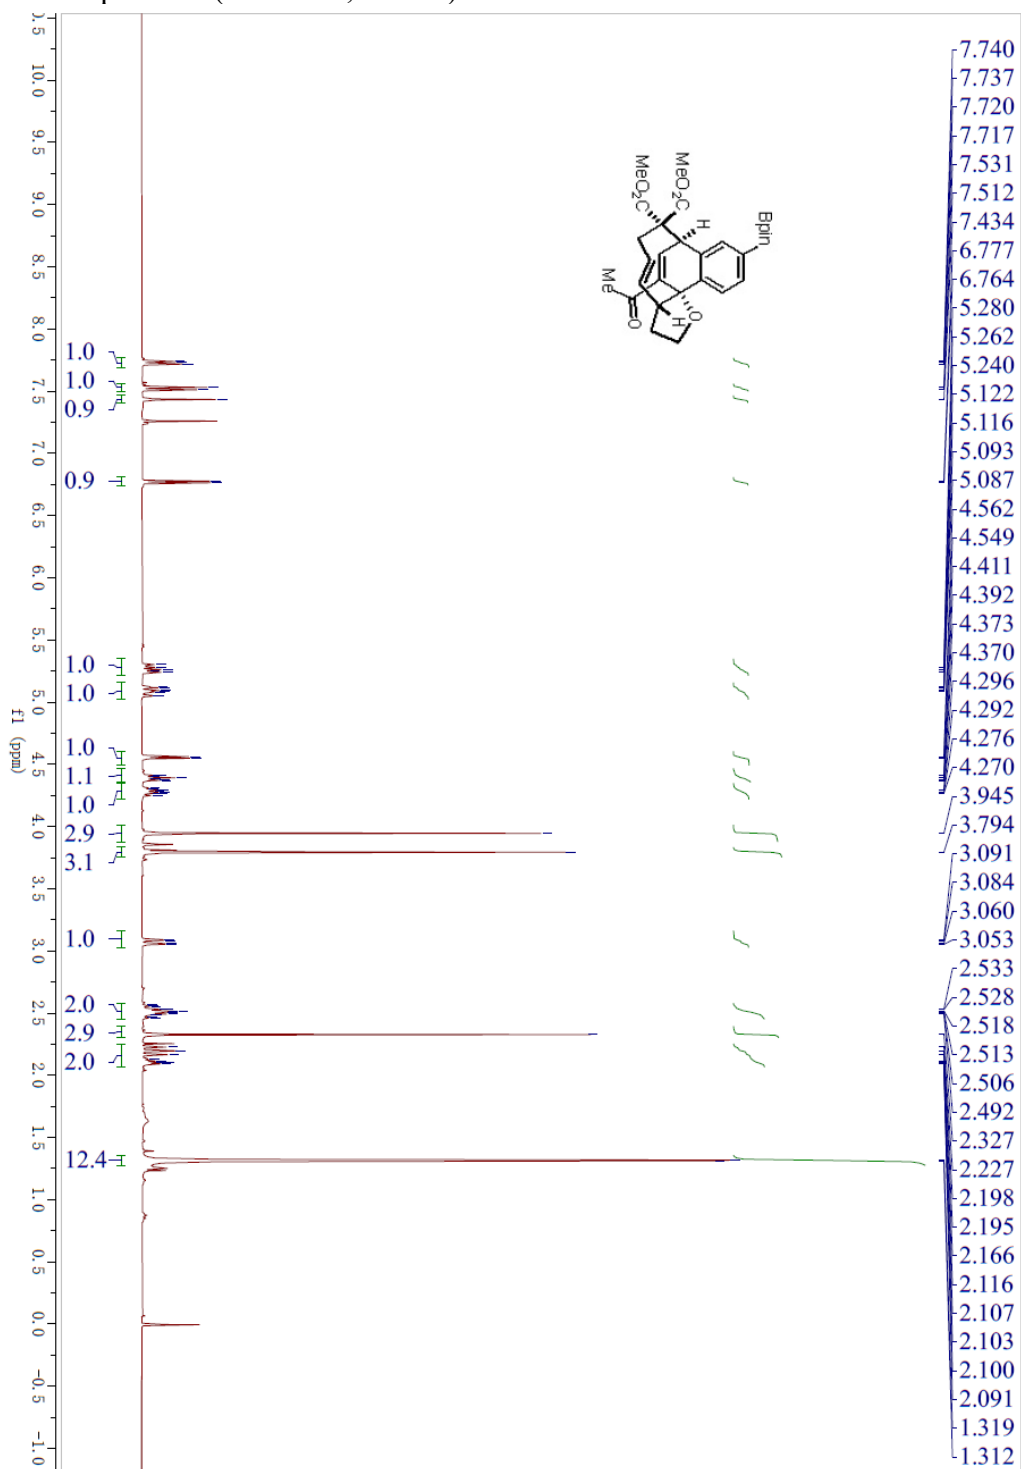



<sup>13</sup>C NMR Spectrum (100 MHz, CDCl<sub>3</sub>) of *E*-2t

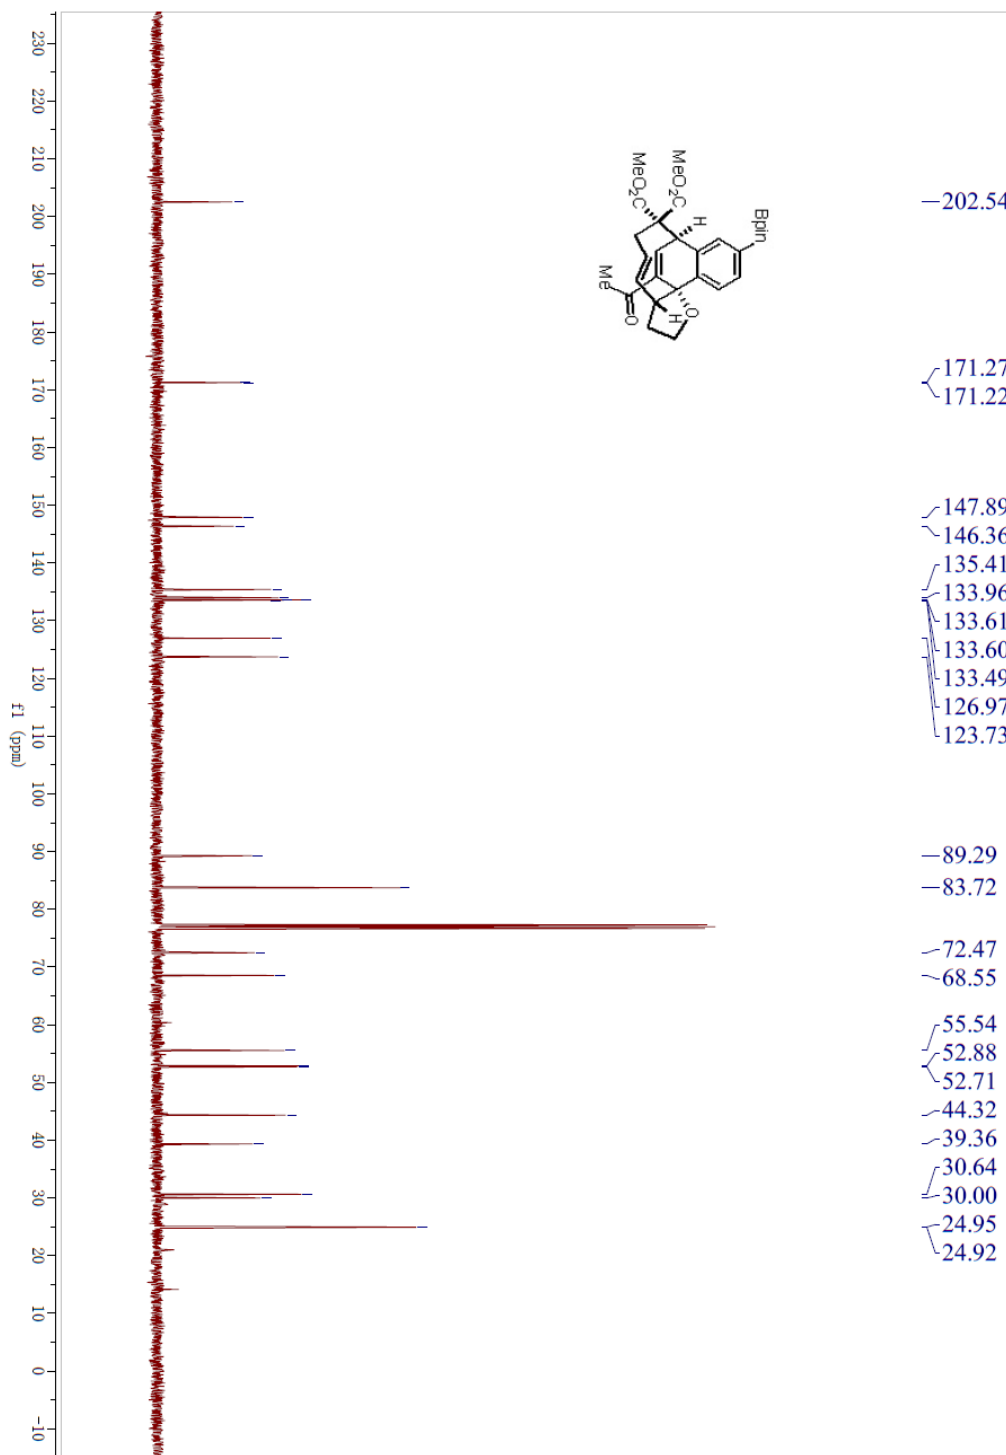

<sup>1</sup>H NMR Spectrum (400 MHz, CDCl<sub>3</sub>) of **10a**

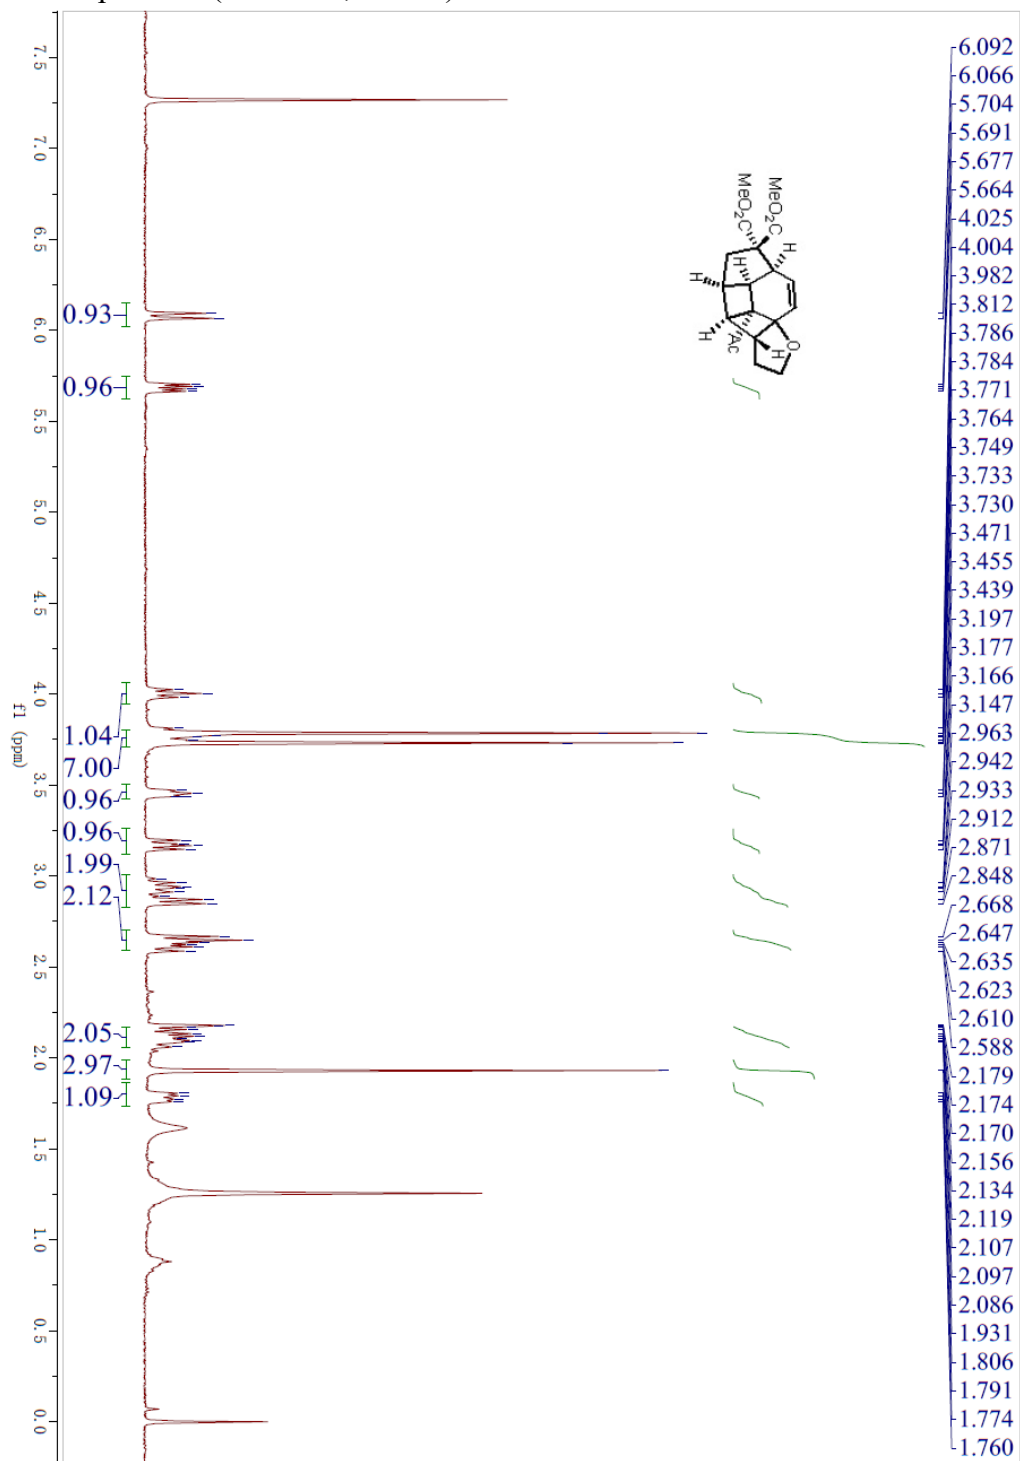

$^{13}\text{C}$  NMR Spectrum (100 MHz,  $\text{CDCl}_3$ ) of **10a**

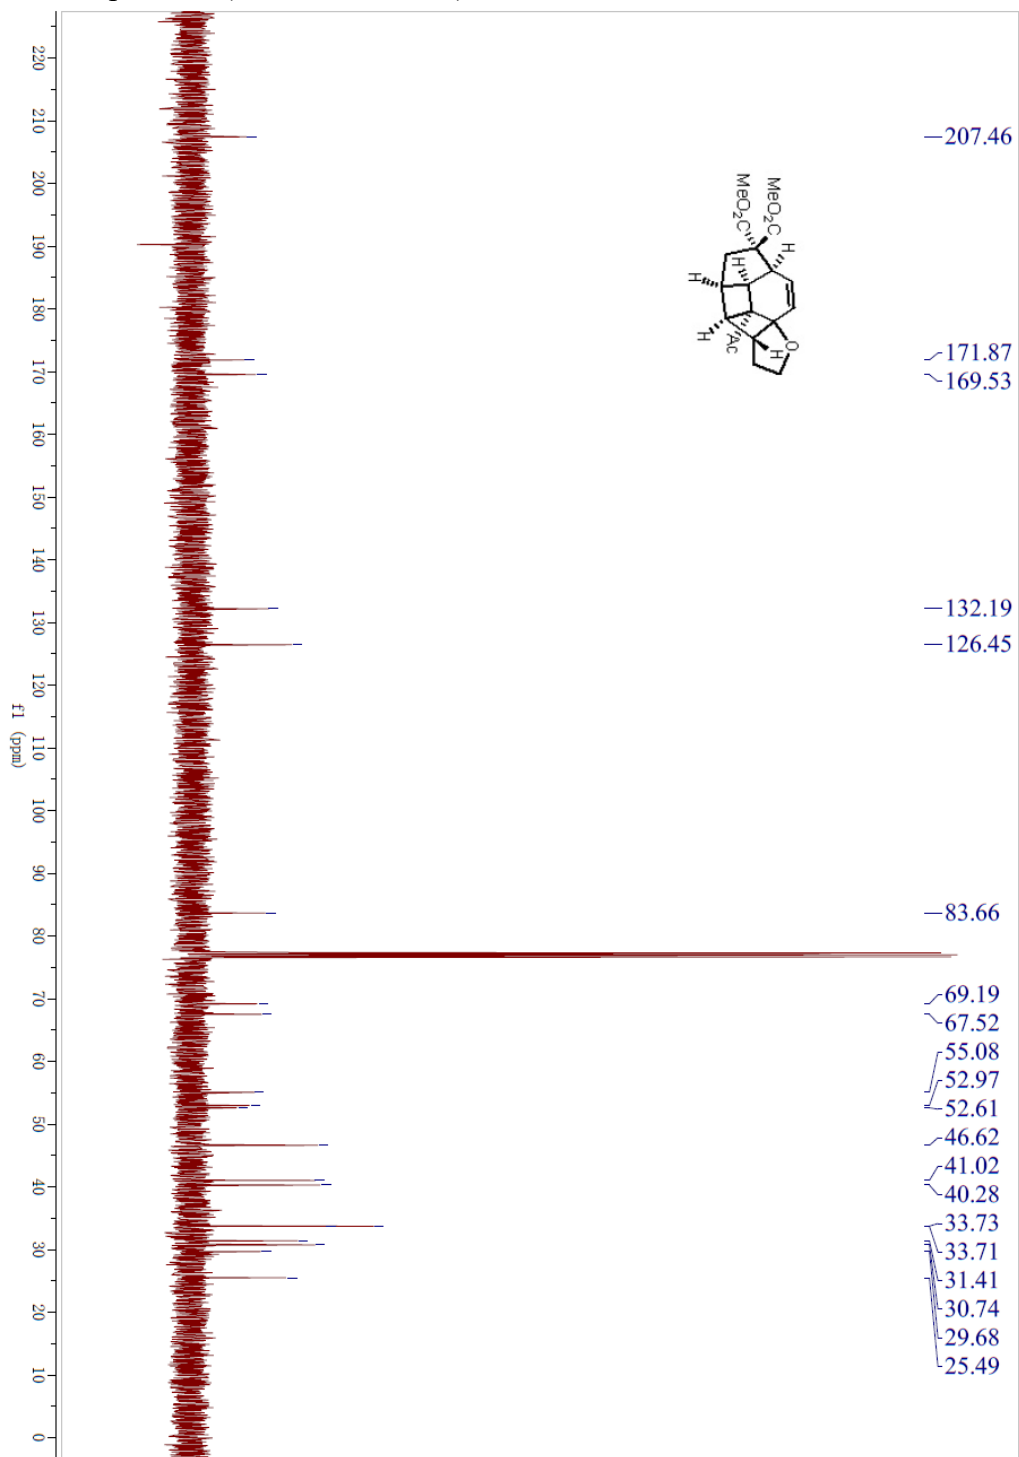

<sup>1</sup>H NMR Spectrum (400 MHz, CDCl<sub>3</sub>) of **10b**

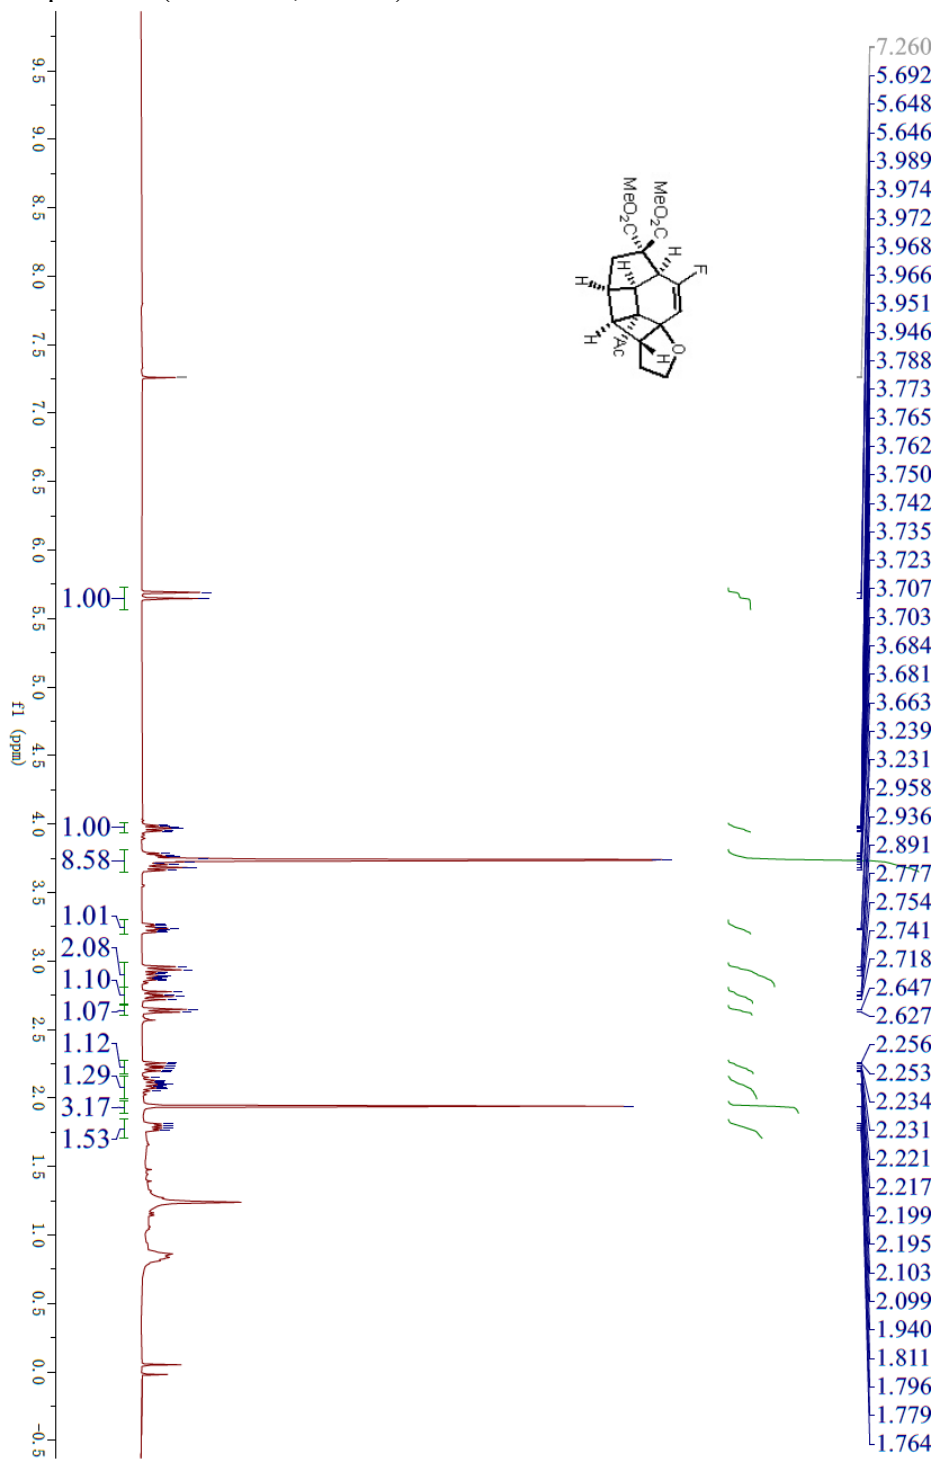

<sup>13</sup>C NMR Spectrum (100 MHz, CDCl<sub>3</sub>) of **10b**

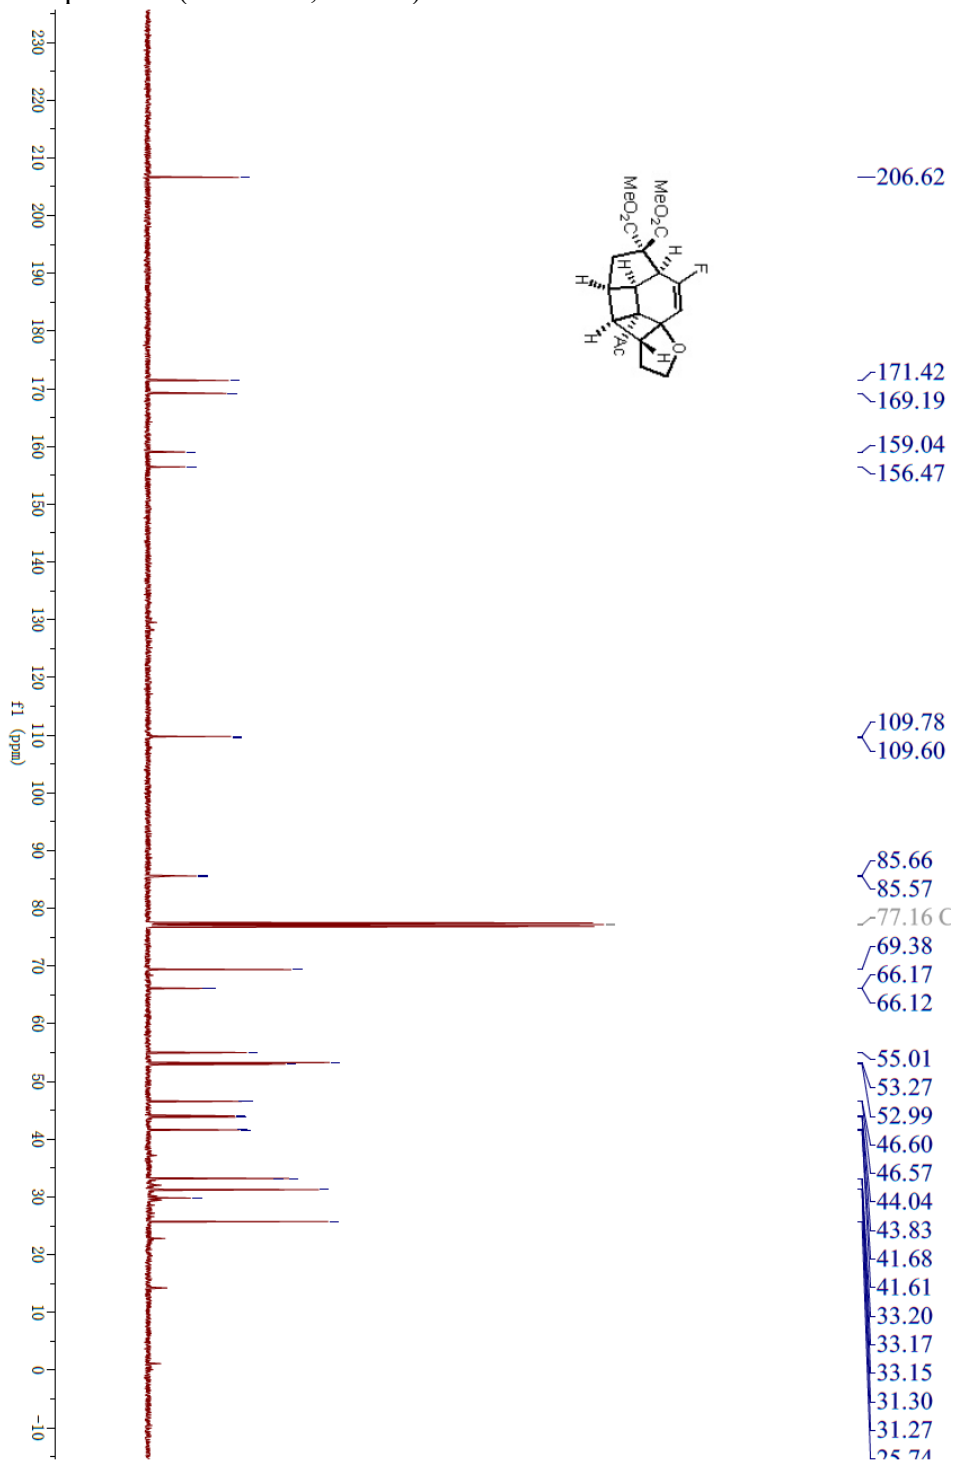

<sup>19</sup>F NMR Spectrum (396 MHz, CDCl<sub>3</sub>) of **10b**

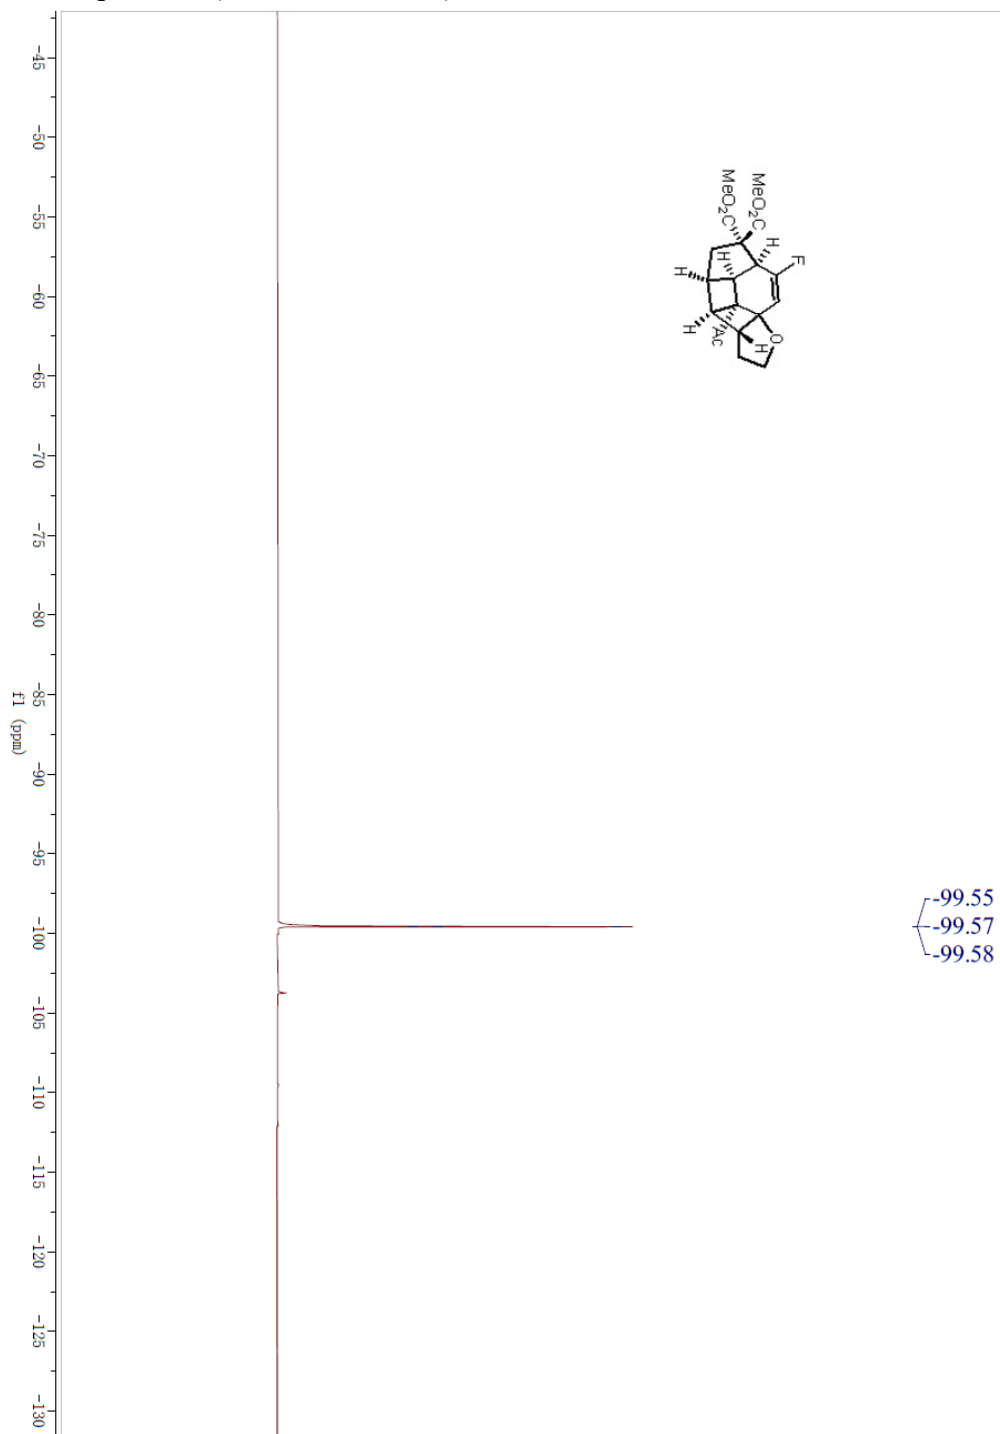

<sup>1</sup>H NMR Spectrum (400 MHz, CDCl<sub>3</sub>) of **3**

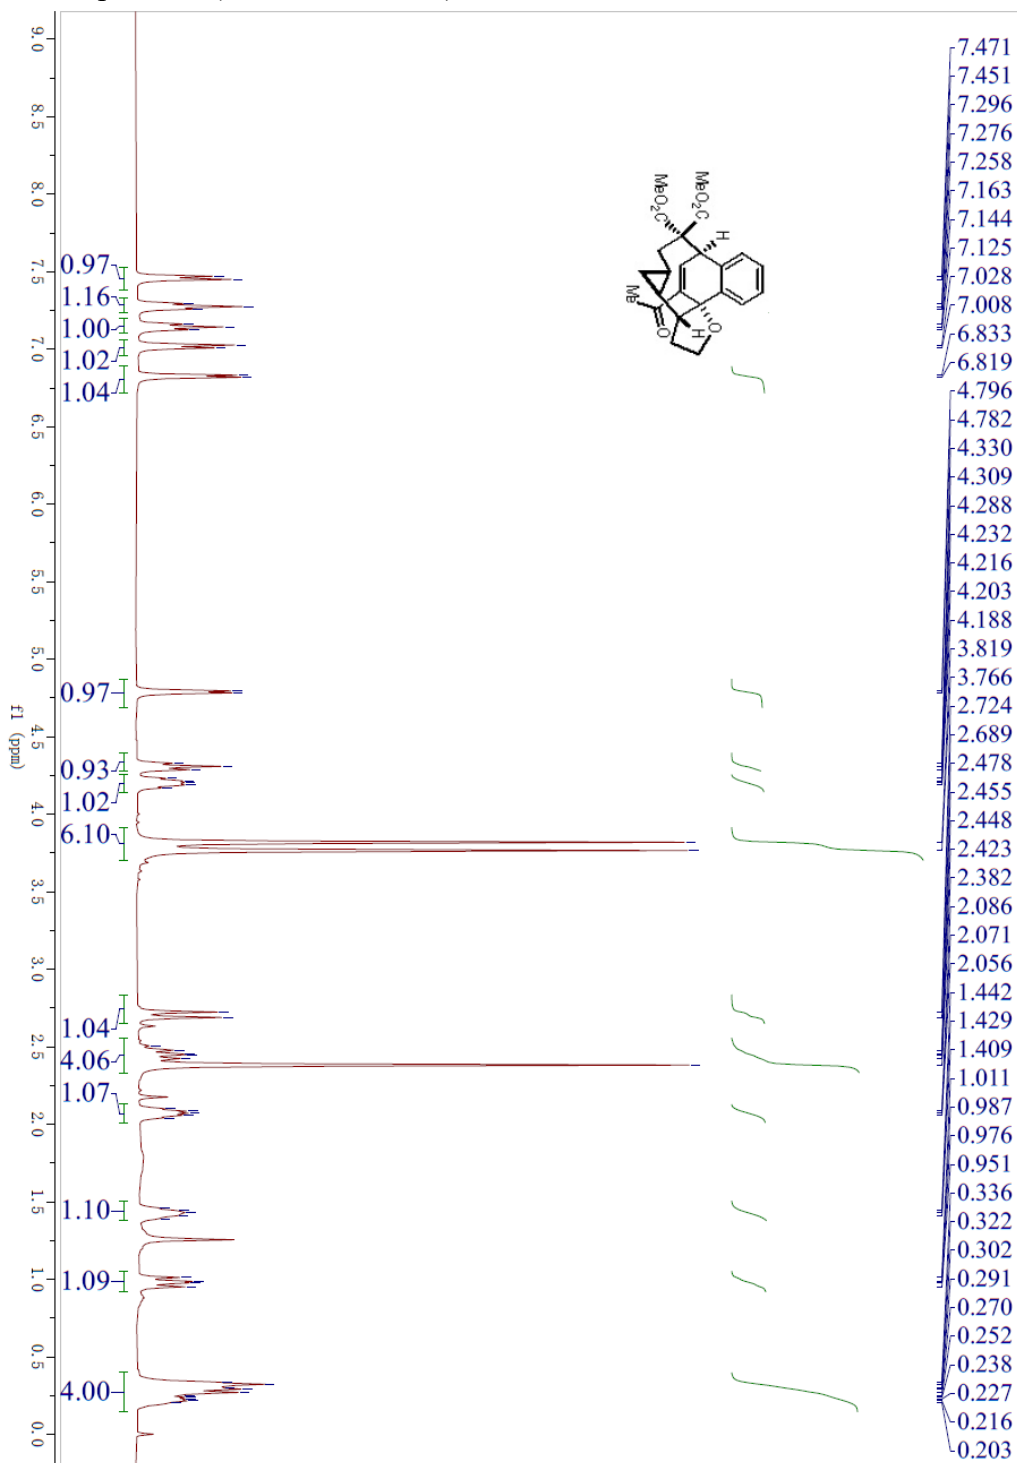

<sup>13</sup>C NMR Spectrum (100 MHz, CDCl<sub>3</sub>) of **3**

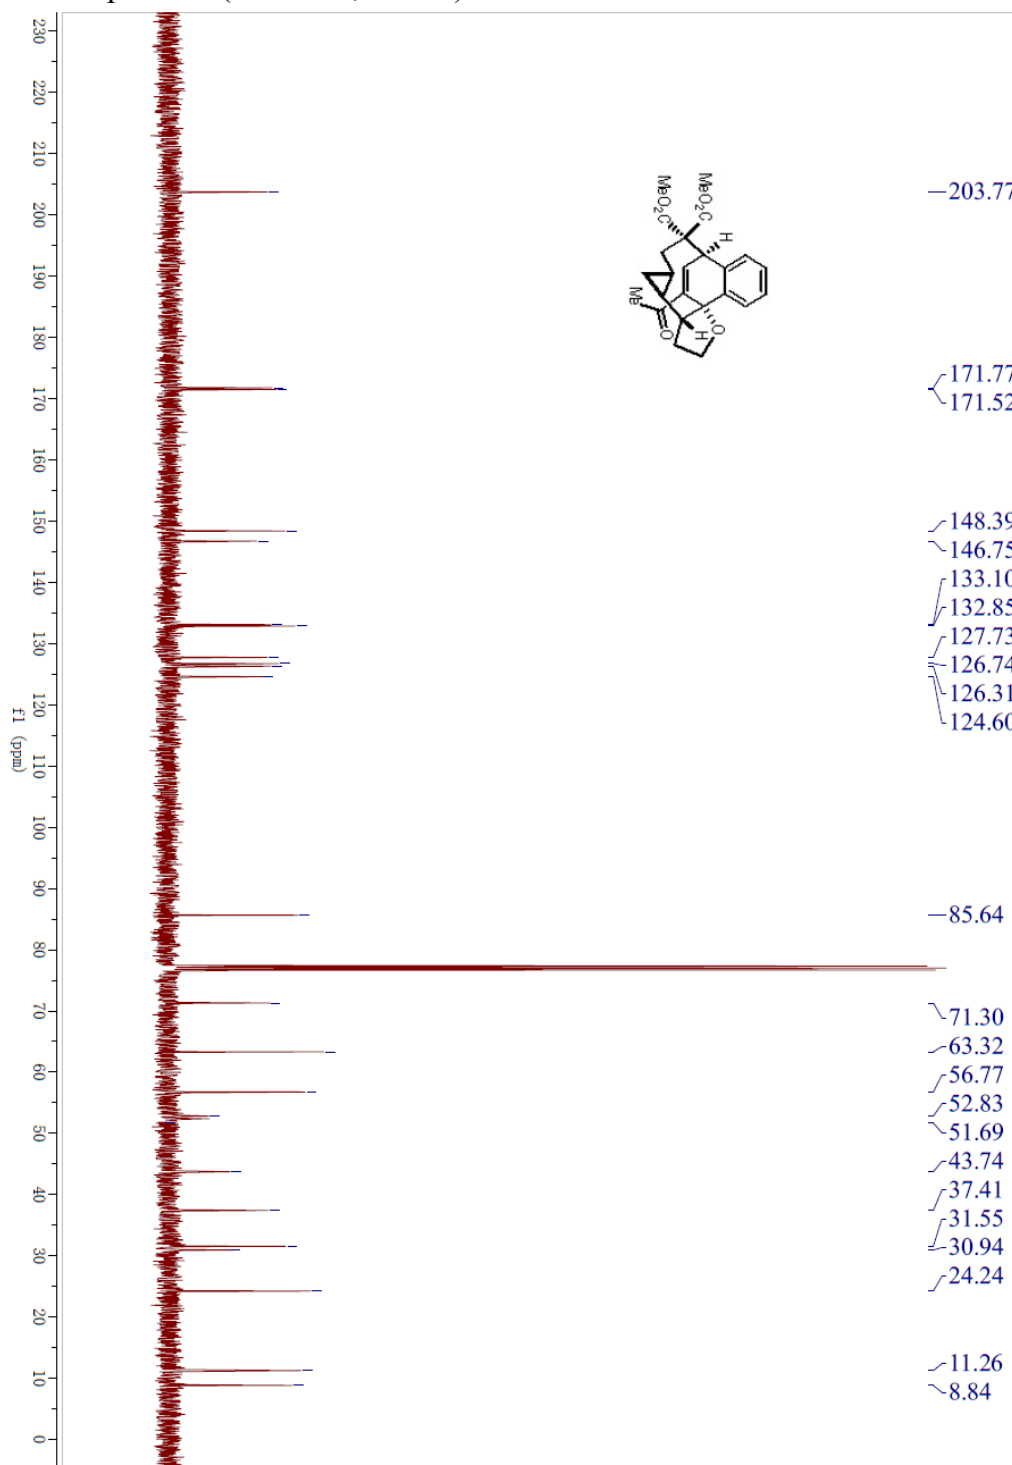



<sup>1</sup>H NMR Spectrum (400 MHz, CDCl<sub>3</sub>) of 4

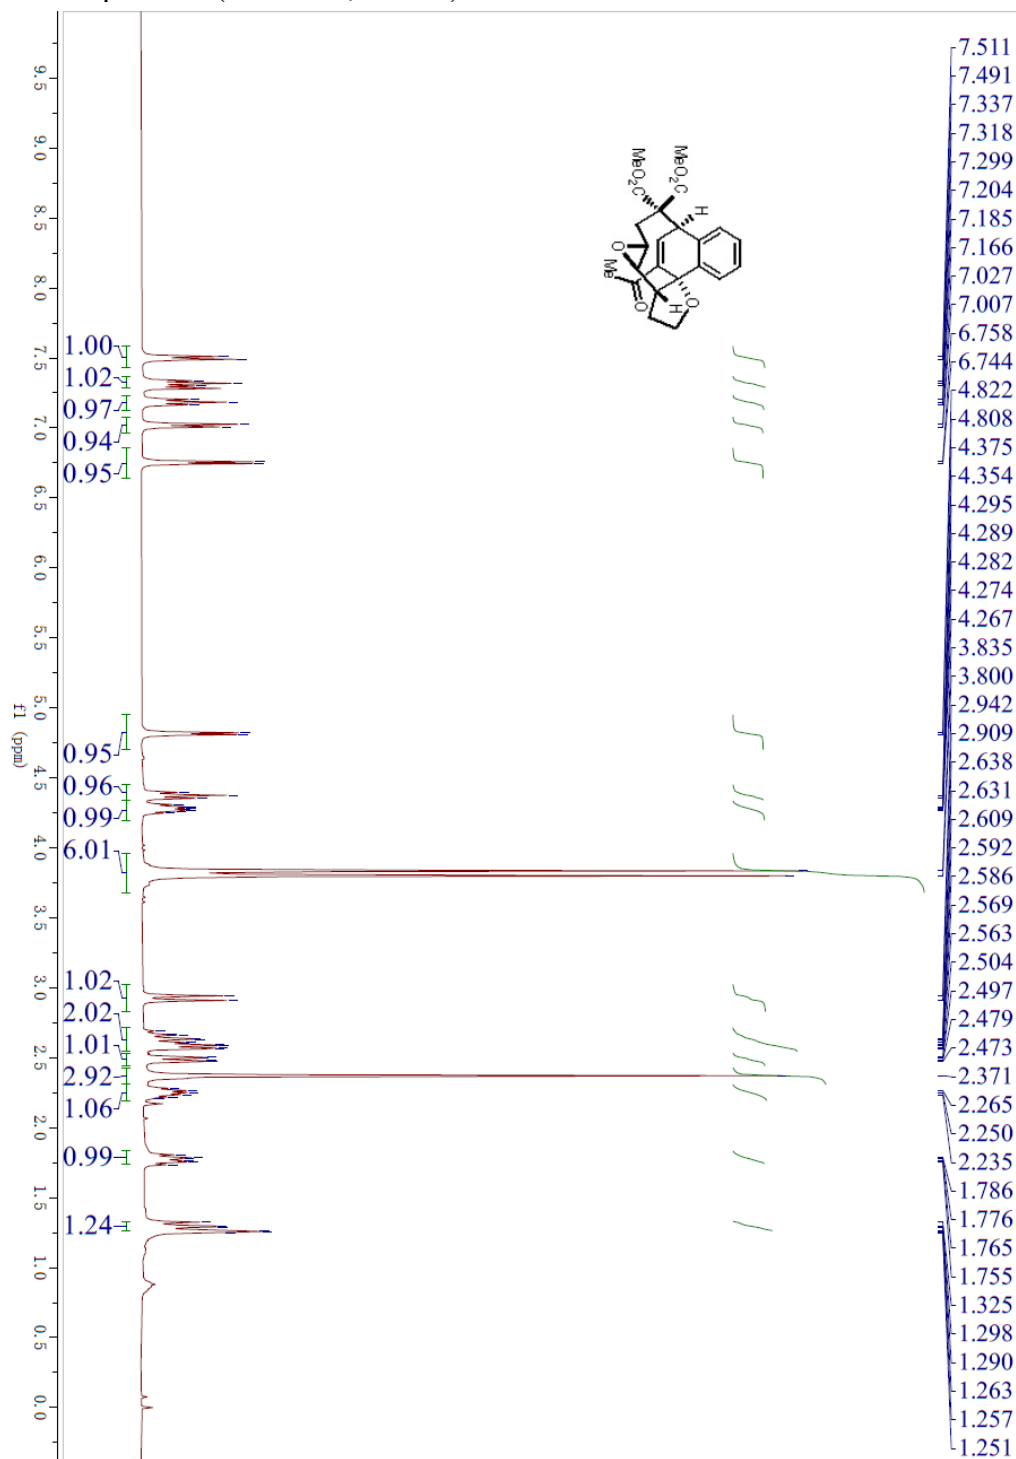

<sup>13</sup>C NMR Spectrum (100 MHz, CDCl<sub>3</sub>) of 4

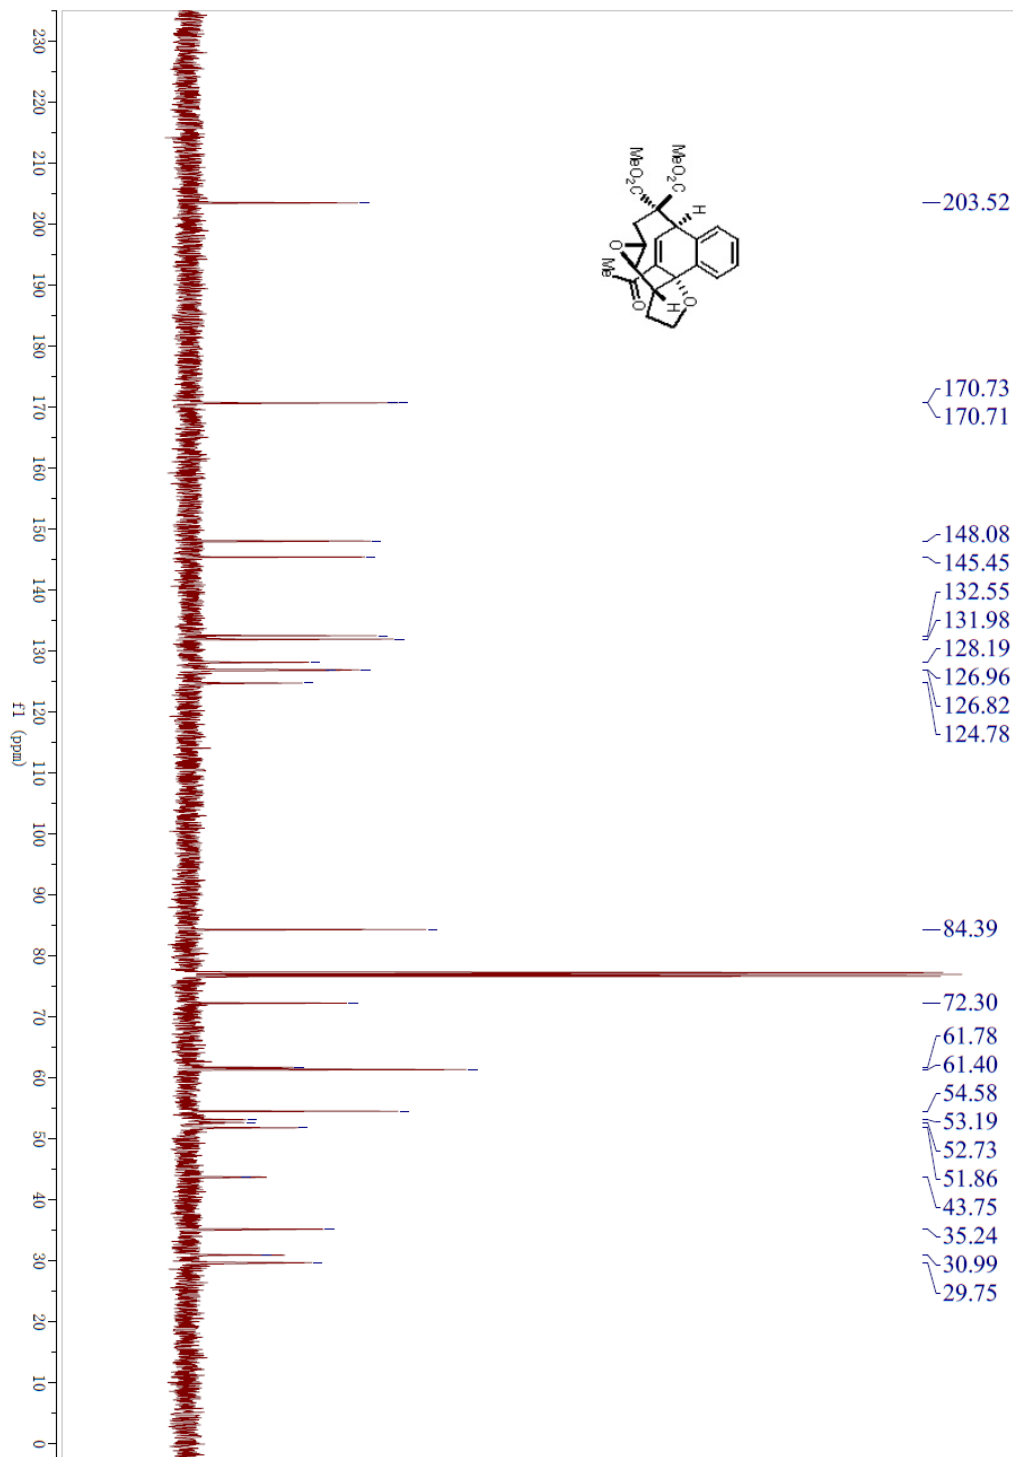

<sup>1</sup>H NMR Spectrum (400 MHz, CDCl<sub>3</sub>) of **5**

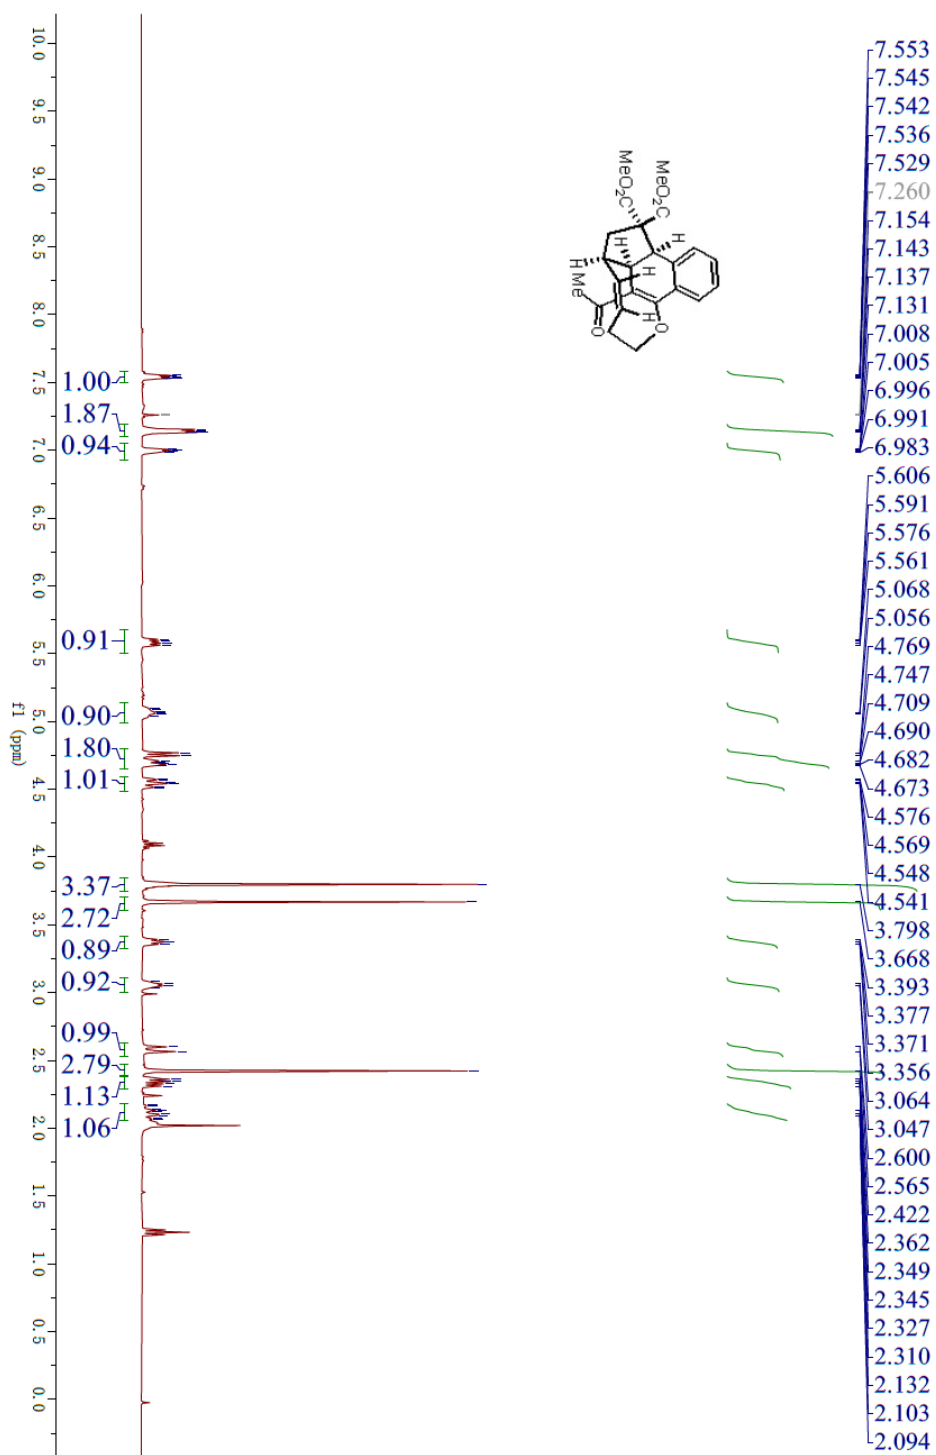

<sup>13</sup>C NMR Spectrum (100 MHz, CDCl<sub>3</sub>) of **5**

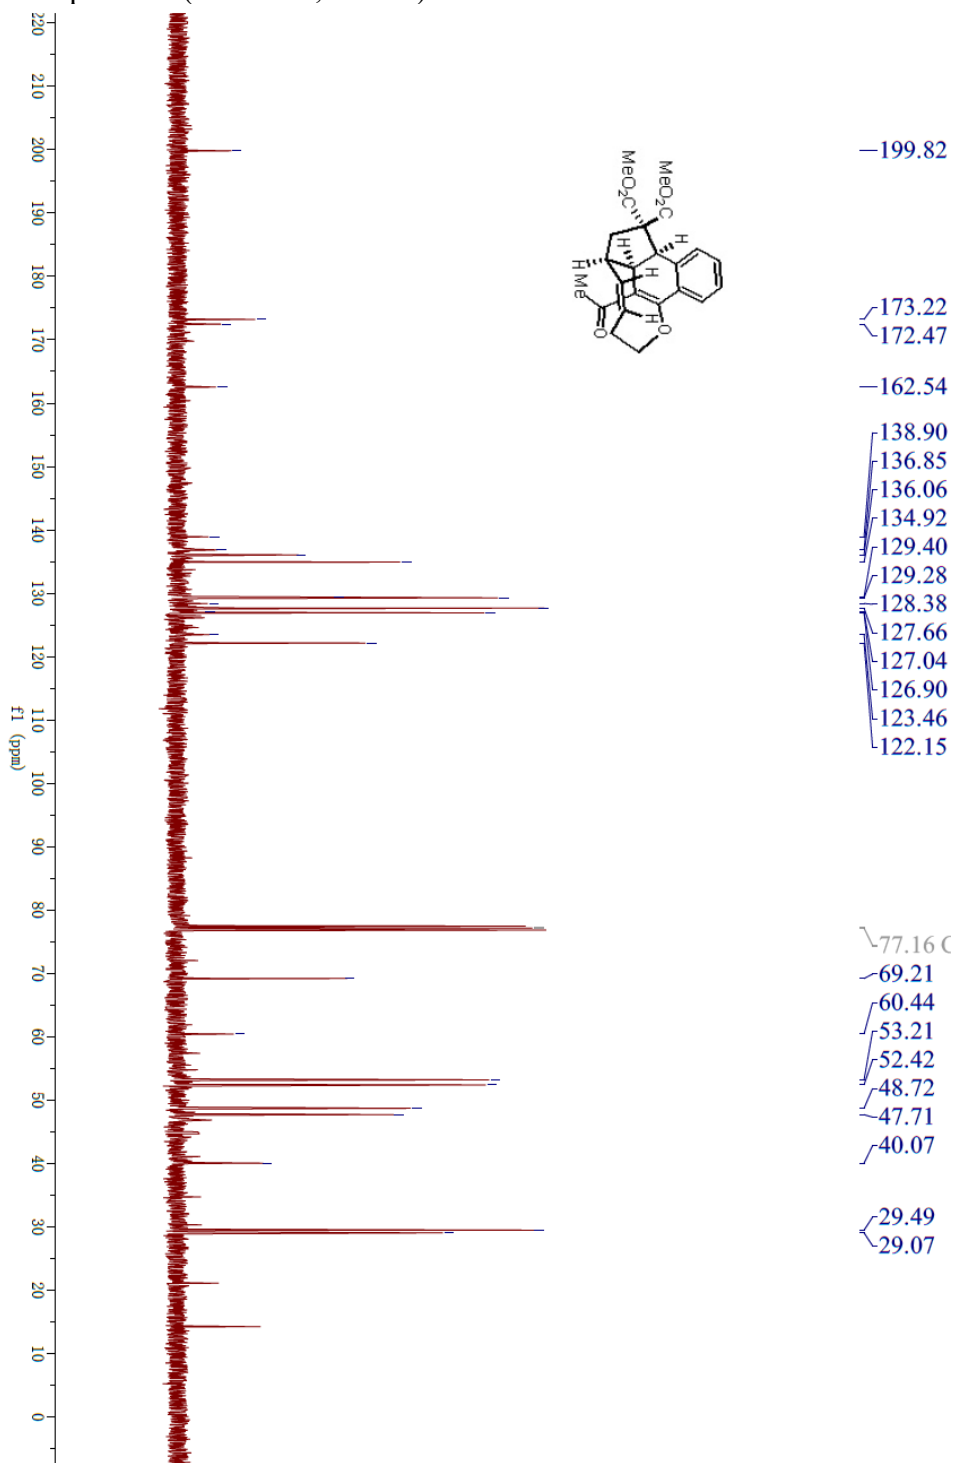

<sup>1</sup>H NMR Spectrum (400 MHz, CDCl<sub>3</sub>) of **6**

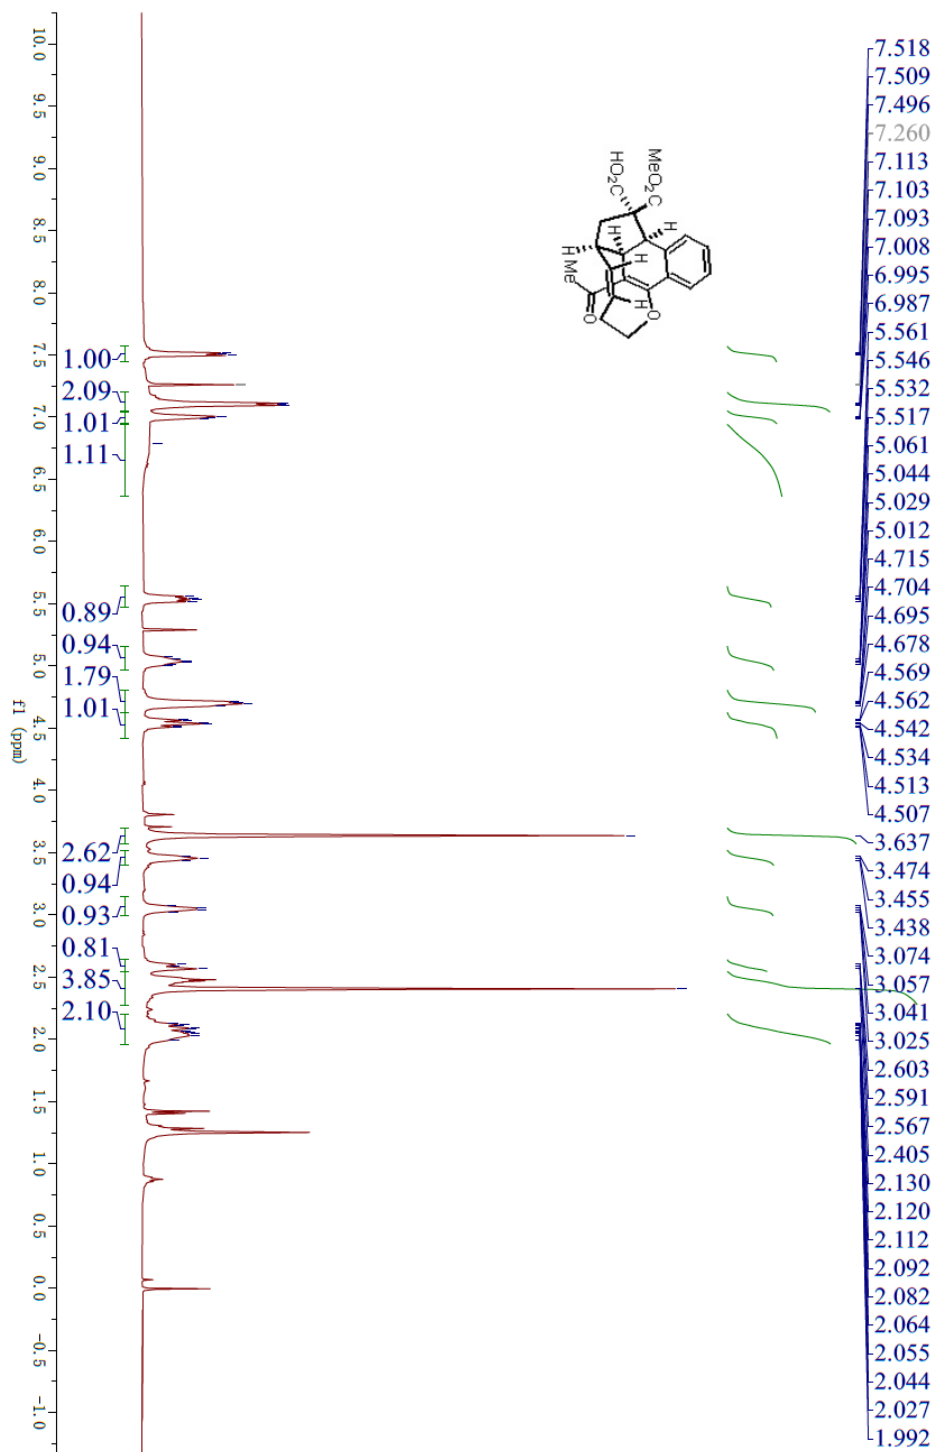

<sup>13</sup>C NMR Spectrum (100 MHz, CDCl<sub>3</sub>) of 6

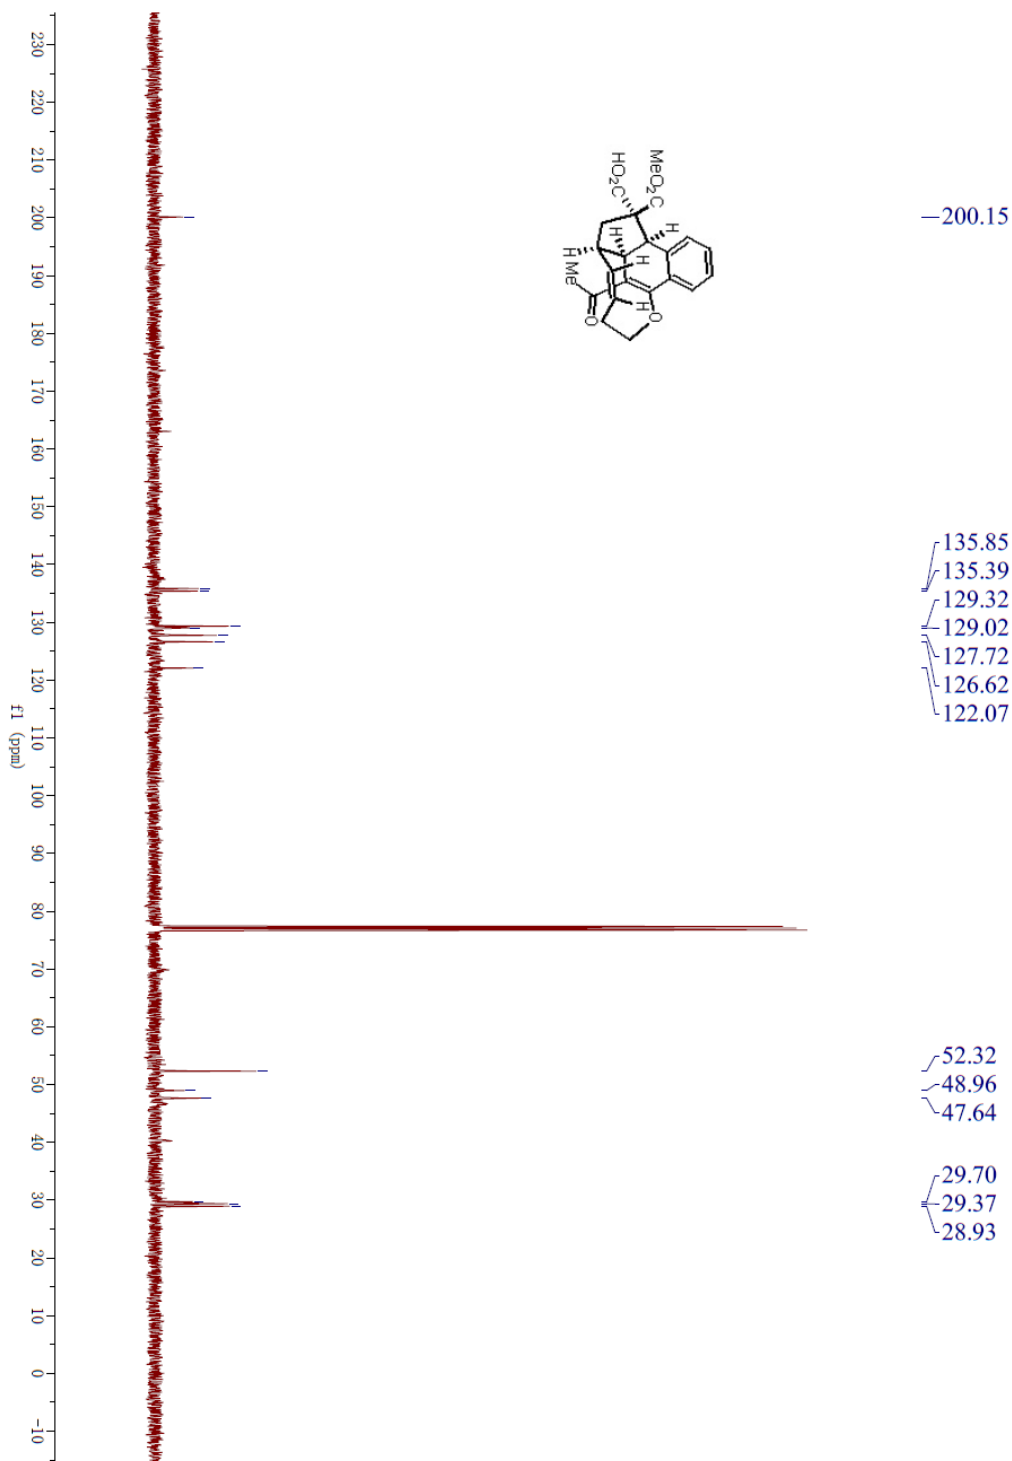

<sup>1</sup>H NMR Spectrum (400 MHz, CDCl<sub>3</sub>) of 7

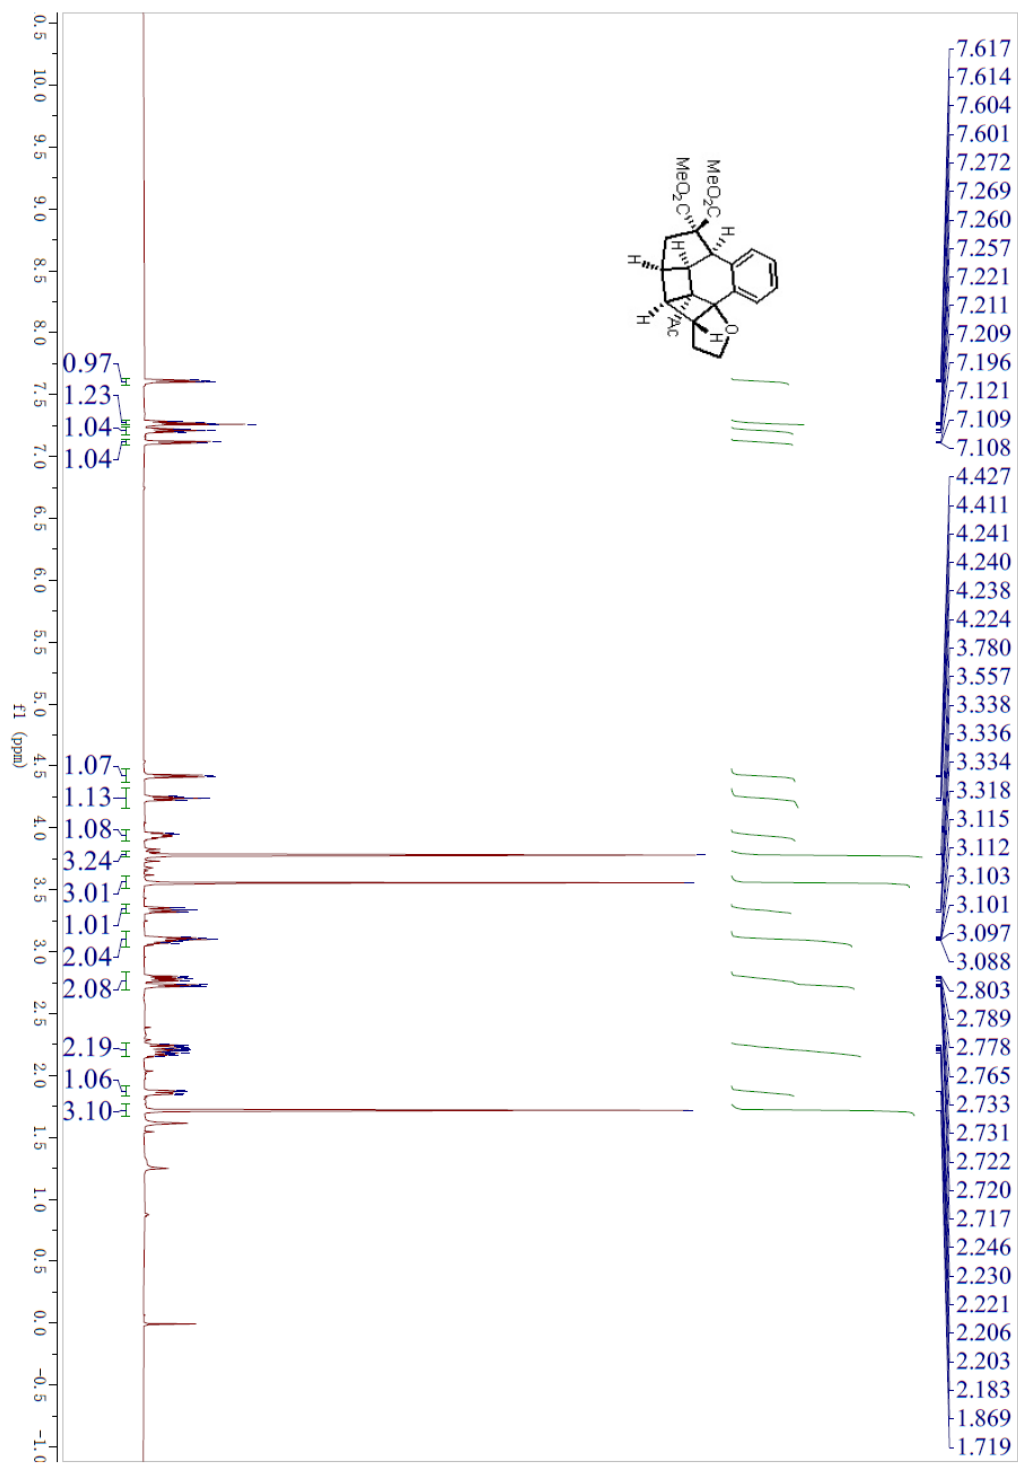

<sup>13</sup>C NMR Spectrum (100 MHz, CDCl<sub>3</sub>) of 7

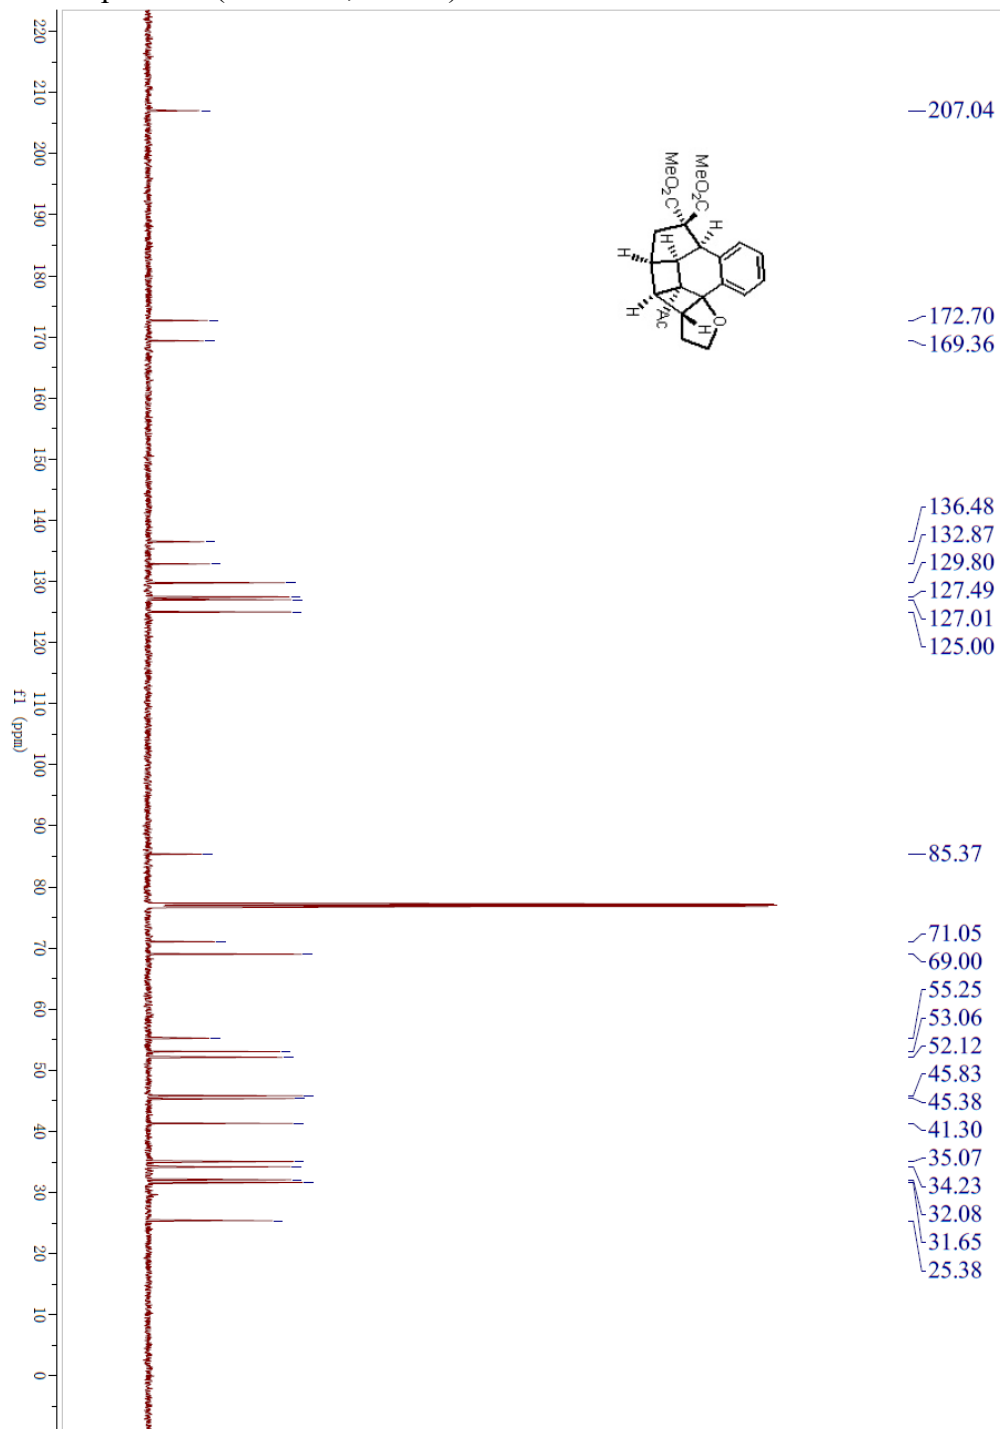



<sup>1</sup>H NMR Spectrum (400 MHz, CDCl<sub>3</sub>) of **8**

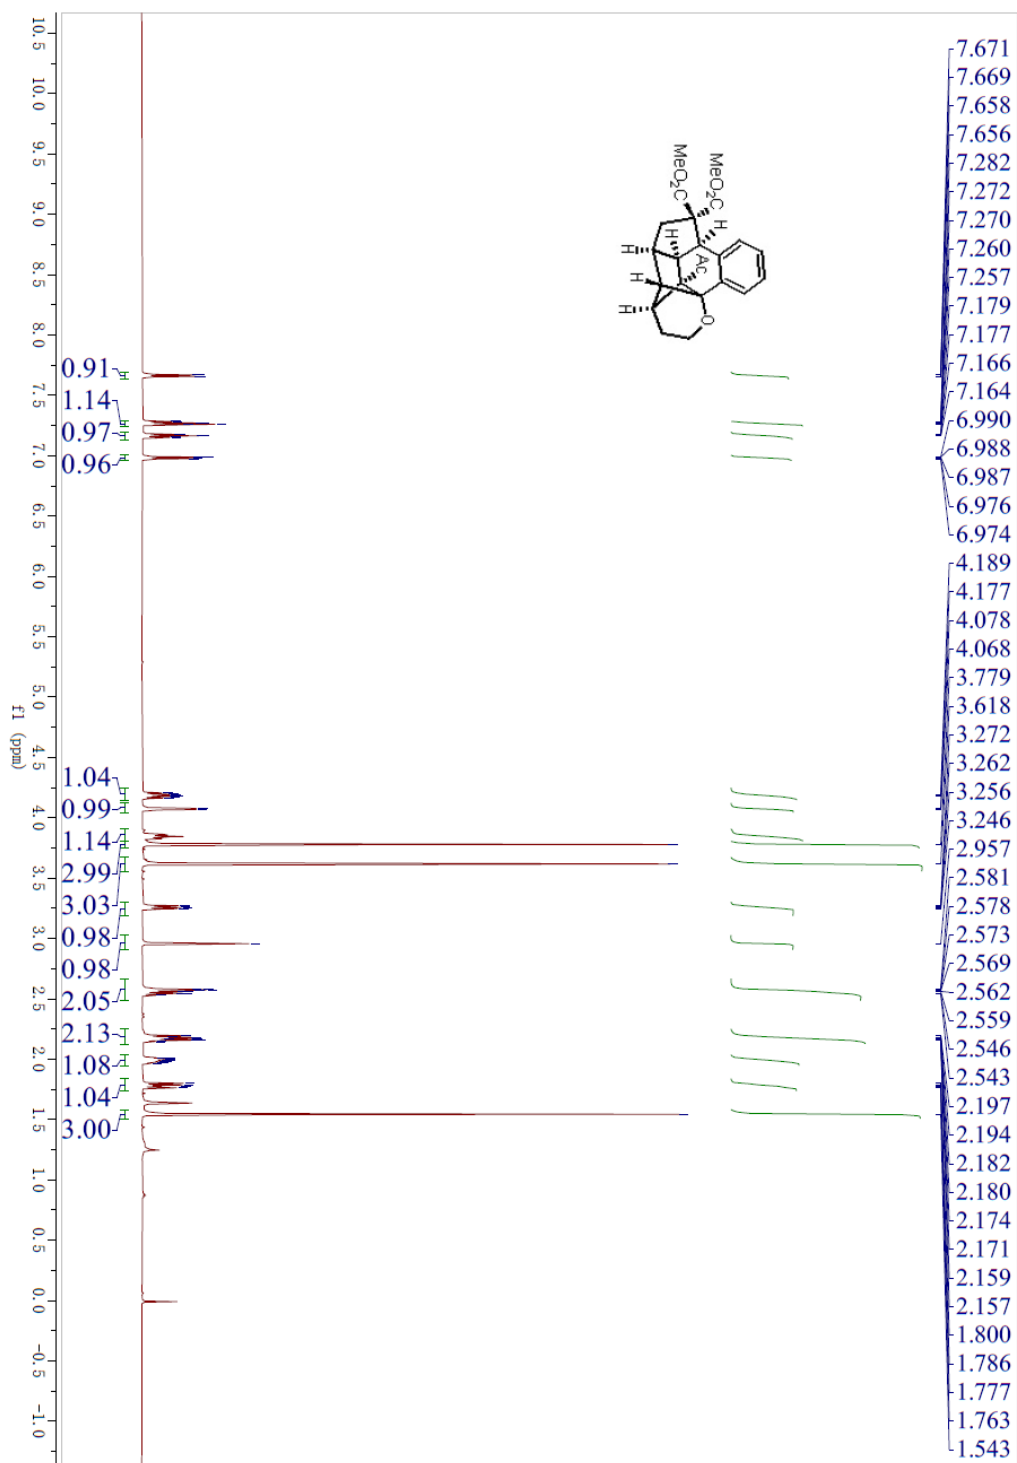

$^{13}\text{C}$  NMR Spectrum (100 MHz,  $\text{CDCl}_3$ ) of **8**

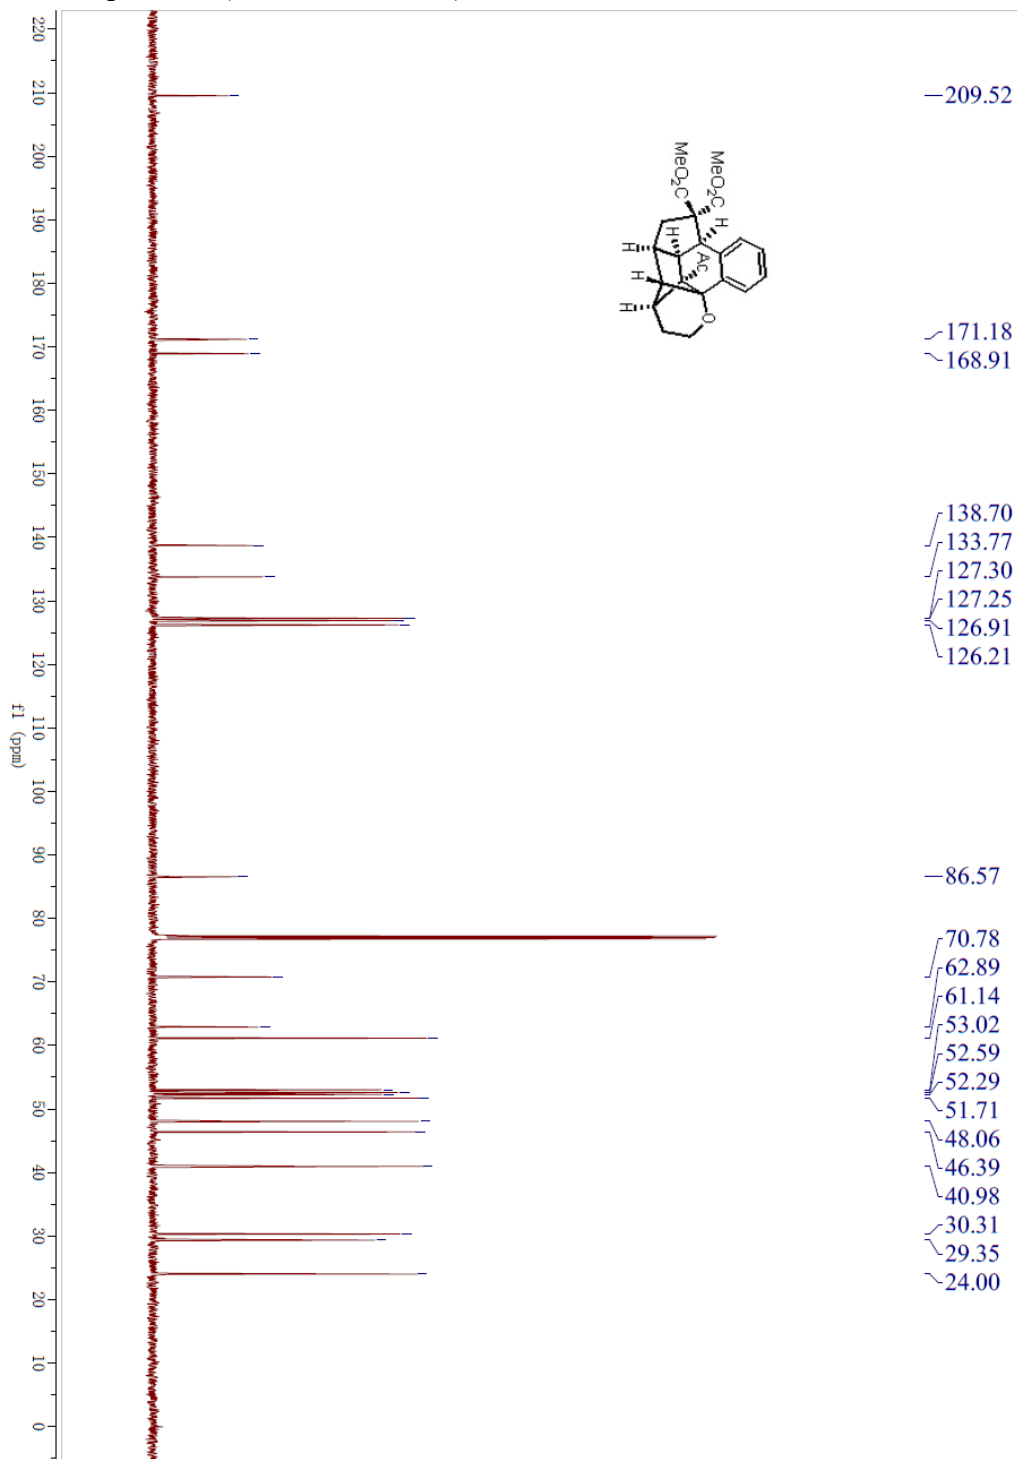

## 7. Unsuccessful Substrates

The unsuccessful substrates for the desired intramolecular dearomatization reactions are listed in Supplementary Figure 9.

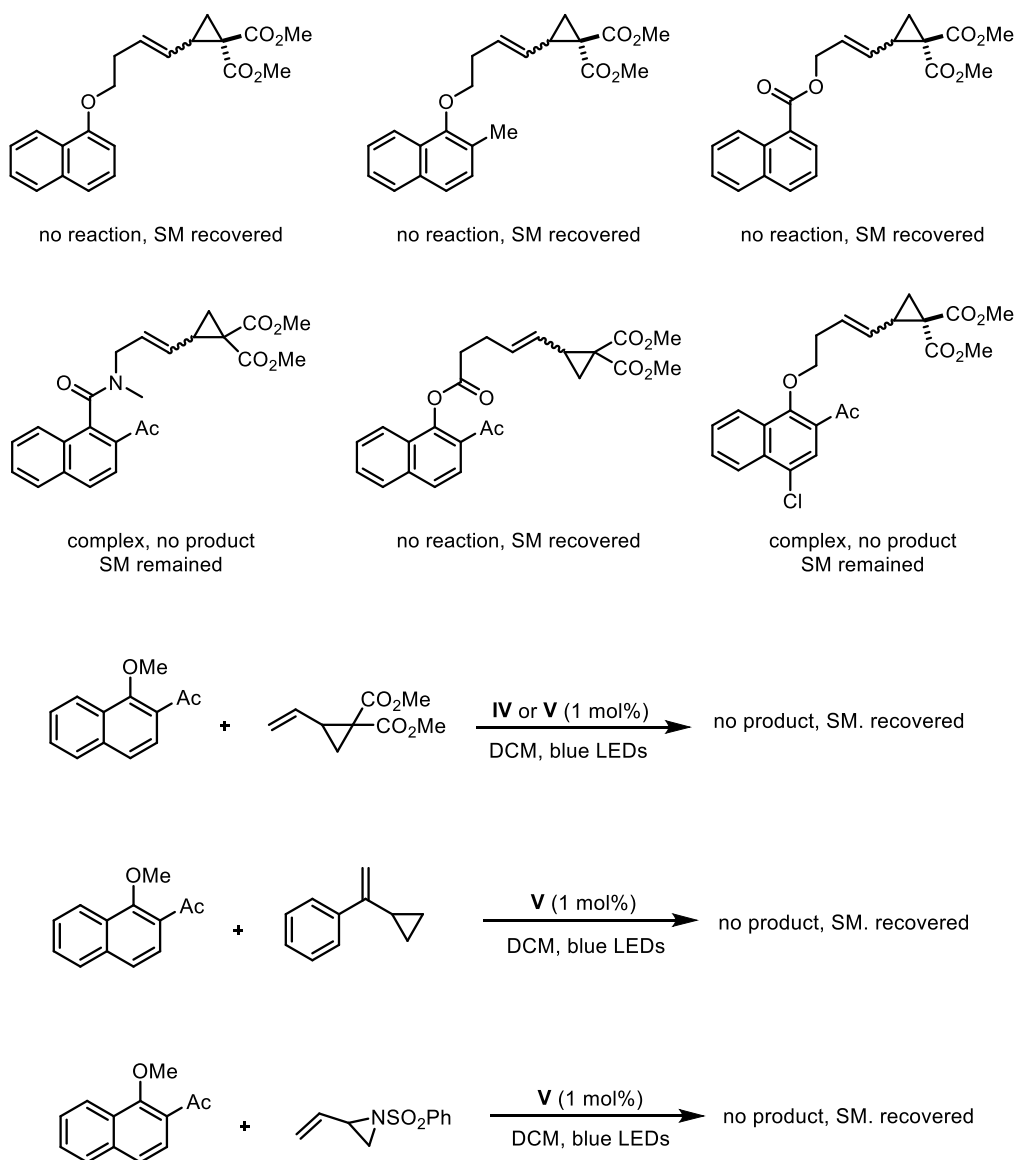

**Supplementary Figure 9.** Unsuccessful substrates for the desired intramolecular dearomatization reactions.

## 8. References

- [1] Feng, Y. *et al.* Synthesis of antitricyclic morpholine derivatives through iodine(III)-mediated intramolecular umpolung cycloaddition of olefins. *J. Org. Chem.* **85**, 4500–4506 (2020).
- [2] James, M. J., Schwarz, J. L., Strieth-Kalthoff, F., Wibbeling, B. & Glorius, F. Dearomative cascade photocatalysis: divergent synthesis through catalyst selective energy transfer. *J. Am. Chem. Soc.* **140**, 8624–8628 (2018).
- [3] Montalti, M., Credi, A., Prodi, L. & Gandolfi, M. T. *Handbook of Photochemistry*, 3<sup>rd</sup> ed, Ed.; CRC, Taylor & Francis Group, Boca Raton, FL, (2006).
- [4] Frisch, M. J. *et al.* Gaussian 16, Revision A.03, Gaussian, Inc., Wallingford CT, 2016.
- [5] Becke, A. D. Density–functional thermochemistry. III. The role of exact exchange. *J. Chem. Phys.* **98**, 5648–5652 (1993).
- [6] Lee, C., Yang, W. & Parr, R. G. Development of the Colle–Salvetti correlation-energy formula into a functional of the electron density. *Phys. Rev. B* **37**, 785–789 (1988).
- [7] Stephens, P. J., Devlin, F. J., Chabalowski, C. F. & Frisch, M. J. *Ab Initio* calculation of vibrational absorption and circular dichroism spectra using density functional force fields. *J. Phys. Chem.* **98**, 11623–11627 (1994).
- [8] Grimme, S., Ehrlich, S. & Goerigk, L. Effect of the damping function in dispersion corrected density functional theory. *J. Comp. Chem.* **32**, 1456–1465 (2011).
- [9] Grimme, S., Antony, J., Ehrlich, S. & Krieg, H. A consistent and accurate *ab initio* parametrization of density functional dispersion correction (DFT-D) for the 94 elements H–Pu. *J. Chem. Phys.* **132**, 154104 (2010).
- [10] Weigend, F. & Ahlrichs, R. Balanced basis sets of split valence, triple zeta valence and quadruple zeta valence quality for H to Rn: Design and assessment of accuracy. *Phys. Chem. Chem. Phys.* **7**, 3297–3305 (2005).
- [11] Weigend, F. Accurate Coulomb-fitting basis sets for H to Rn. *Phys. Chem. Chem. Phys.* **8**, 1057–1065 (2006).
- [12] Marenich, A. V., Cramer, C. J. & Truhlar, D. G. Universal solvation model based on solute electron density and on a continuum model of the solvent defined by the

bulk dielectric constant and atomic surface tensions. *J. Phys. Chem. B* **113**, 6378–6396 (2009).

[13] Harvey, J. N., Aschi, M., Schwarz, H. & Koch, W. The singlet and triplet states of phenyl cation. A hybrid approach for locating minimum energy crossing points between non-interacting potential energy surfaces. *Theor. Chem. Acc.* **99**, 95–99 (1998).

[14] Lu, T. sobMECP program; <http://sobereva.com/286>.
